# Supplementary material
Source: Research Square preprint supplement (doi:10.21203/rs.3.rs-9540613/v1)
Supplement: Supplementary file 1 [file 0d9bb5ad71d7f872a113114e.xlsx]

## Sheet: Sheet1
Word	Length	Count	Weighted Percentage (%)	Similar Words
msa	3	496	1.85	msa
tongue	6	1223	1.75	arabic, delivery, egyptian, language, latin, speaking, speech, tongue
arabic	6	867	1.62	arab, arabic
exp	3	426	1.59	exp
student	7	685	1.53	intellectual, major, master, student, students, students'
yrs	3	409	1.4	period, years, yrs
education	9	2619	1.28	academic, acquisition, assimilation, create, derivation, derivations, educated, education, educational, educators, foundation, informed, instruction, knowing, learned, learning, lesson, make, master, mastering, pedagogical, pedagogically, pedagogy, phonics, prepare, professional, school, see, talk, teacher, teaching, train
dialectal	9	439	1.25	accent, accents, dialect, dialectal, 'dialectal, dialects, idiom, idioms
abstract	8	2879	1.19	ability, absent, abstract, access, accuracy, activity, age, asset, background, brief, chance, clarity, communication, complexity, comprehensibility, concept, conduct, construct, content, credibility, depth, difference, difficulty, distinction, due, entity, equivalent, expressiveness, feel, feeling, form, general, generally, good, group, heritage, ideal, identity, information, judgment, knowledge,…
change	6	2664	1.18	access, action, adapt, add, address, affect, age, aid, alienate, align, appreciate, appreciation, approach, approaching, articulation, attachment, back, become, benefit, better, boost, breathe, bring, broadening, build, carry, change, changes, clarification, clear, close, closing, code, comfort, coming, compare, compound, concrete, confuse, confusion, conjugation, connection, construct, content, …
people	6	1805	1.08	academia, audience, business, class, domain, english, french, inhabit, live, living, people, poor, rich, world, young
national	8	1744	1.06	change, countries, english, french, national, people, position, power, state, states, status
concept	7	2289	1.04	abstract, access, aspect, basics, basis, complex, compound, concept, concepts, constant, construct, construction, constructively, creativity, designed, due, end, factor, feature, form, foundation, framework, given, hypothetical, idea, kind, law, like, make, model, one, part, perception, point, right, rule, section, teacher, term, theory, thing, thought, type, value, variety, way, whole
teacher	7	1805	1.03	abstract, teacher, teacher', teachers, teachers'
thought	7	2489	0.98	abstract, address, beauty, complex, compound, concept, constant, construct, content, end, error, example, factor, fallacy, feature, feeling, form, framework, hypothetical, idea, ideal, ideas, kind, law, meaning, mistake, model, part, pattern, perception, presence, program, reaction, reflective, right, rule, section, significance, source, standard, system, teacher, term, theory, thing, thought, va…
demonstrative	13	1855	0.91	demonstrate, demonstrated, demonstrates, demonstrating, demonstrative, expression, illustrate, illustrating, manifest, pronoun, proving, reflect, show, showed, showing, shows, support, teacher
adults	6	1829	0.87	academic, adults, beauty, case, elder, key, name, professional, sister, teacher, type
professional	12	1840	0.87	academic, change, key, master, mastering, professional, professionalism, teacher
acts	4	2157	0.77	absence, acquisition, action, activity, acts, aid, application, assessment, attempt, attention, balancing, bank, battle, best, book, boost, business, causing, change, class, collection, comfort, conduct, confusion, convention, corrections, cover, dealing, decision, delivery, departure, derivation, development, drill, education, effort, emphasizing, encouragement, engagement, entry, error, essay, …
linguistic	10	294	0.77	dialectology, grammar, linguistic, linguistically, linguistics, morphology, phonology, pragmatics, sociolinguistics, syntax
actively	8	1958	0.74	action, actively, activities, activity, adherence, aid, aim, analysis, application, attachment, attempt, attention, back, battle, best, boost, boring, bridge, building, business, change, class, collection, comfort, conduct, construction, cover, development, drill, drilling, dynamic, education, effort, encouragement, end, endorsement, engagement, essay, exercise, fighting, fire, first, fitting, fl…
latin	5	913	0.68	french, latin, translate
shorten	7	931	0.68	change, french, reduce, reduction, short, shorten
used	4	933	0.64	activity, address, application, applied, apply, consume, dedicate, development, employ, exercise, exercises, follow, function, functional, functions, give, habit, habits, habitual, habitually, help, influence, misused, move, practical, practice, practiced, practices, practicing, promote, purpose, purposes, role, service, take, task, usage, use, used, useful, uses, using, utility, work
language	8	904	0.57	accent, argumentation, audience, basic, chat, conversation, dialect, discussion, egyptian, exchange, expression, idiom, interrogative, interview, language, 'language, language', languages, phrase, pronunciation, question, reading, saying, sentence, session, slang, speech, talk, text, tongue, usage, vernacular, word, words
varieties	9	521	0.53	change, changes, collection, difference, diverse, diversity, form, forming, forms, kind, like, make, model, nature, range, review, show, type, variation, varieties, variety, version
informal	8	1135	0.52	account, background, basics, book, brief, case, change, clarifying, clear, collection, colloquial, common, communicate, confidence, content, convey, cover, curriculum, daily, demonstrate, demonstrative, demystify, describe, develop, direct, drill, easing, educated, educational, everyday, example, explain, expose, familiar, fear, general, give, ground, informal, information, informed, informs, inp…
subject	7	1045	0.51	affect, case, content, dependency, dependent, depending, depends, dialectology, domain, english, expose, give, history, impact, issue, issues, judgment, law, linguistics, literature, major, master, national, object, open, opening, openly, opens, personal, pragmatics, problem, question, relationship, sociolinguistics, sociology, studies, study, subject, term, thing, topic, topics
expressions	11	1017	0.48	accent, account, add, affect, articulation, ask, aspect, aspects, background, breathe, carries, carry, carrying, communicate, communicating, communication, communicative, construct, construction, constructively, convey, conveyed, conveying, emphasize, explain, explicit, explicitly, express, expressed, expresses, expressing, expression, expressions, expressive, expressiveness, face, faced, fast, g…
making	6	903	0.48	access, action, add, attempt, become, bring, build, building, builds, carry, causing, change, chart, clear, clearly, compound, conduct, confuse, constitutes, construct, construction, constructively, cover, create, created, creates, creating, develop, direct, 'do, 'do', double, encourage, engage, ensure, evolve, express, facilitate, fashioned, fashioned', find, fingerprint, fire, follow, form, for…
strategies	10	128	0.47	game, strategies
yes	3	200	0.47	yes, 'yes
content	7	1410	0.46	abstract, account, acknowledgement, address, affirmation, agreement, application, appreciation, approach, argumentation, argumentative, basics, book, challenge, collection, concept, confidence, construct, content, core, curriculum, derivation, difference, encouragement, endorsement, engagement, entry, error, example, experience, explanation, expression, fallacy, feedback, feeling, fire, fostering…
structures	10	570	0.46	back, backbone, barrier, bridge, building, case, classroom, complex, compound, construct, construction, constructively, form, foundation, framework, framing, functional, guide, hurdle, integral, integrate, integrates, integrating, integration, integrity, interference, keep, knowledge, level, linguistics, morphology, mouth, obstacle, opening, pattern, pen, root, school, spot, still, stop, structur…
communication	13	1227	0.45	account, acknowledge, address, agreement, apply, articulation, ask, brief, carry, challenge, change, chat, common, communicate, communicating, communication, communicative, communicators, communities, community, connection, continue, convey, conveyed, conveying, coo, cover, day, dedicate, demonstrate, describe, desire, develop, direct, discourse, discuss, discussion, drill, explain, expose, expre…
english	7	834	0.44	aave, american, english, 'english, englishes, englishes'
german	6	892	0.44	american, applicability, english, german, relevant, usage
human	5	924	0.44	change, dialectology, english, history, human, humanizes, law, linguistics, literature, methodology, study, subject, world
domains	7	875	0.41	domain, domains, egypt, english, history, linguistics, major, set, study, subject
american	8	887	0.4	aave, american, assimilation, change, english, expression, usage
knowledge	9	1259	0.38	ability, acquisition, attention, background, case, cognitive, concept, construct, content, convention, core, creativity, difficulty, equivalent, example, experience, feeling, form, general, habit, hand, heritage, idea, ideal, influence, information, initial, initially, input, instance, interpretation, issue, knowing, knowledge, language, lead, learning, lexicon, life, literacy, living, love, mean…
responded	9	202	0.38	acknowledge, agree, allow, clear, give, let, mention, notice, pass, replied, reply, responded, stand, state, support
different	9	392	0.37	balance, change, contrast, contrasting, contrastive, deny, departure, deviation, deviations, differ, difference, differences, different, differently, differs, disconnect, distinct, distinction, divergences, diverse, gap, number, several, variation, variety, various, vary, words
word	4	794	0.37	adjective, adverb, article, articulated, articulation, ask, book, books, 'books, books', connective, demonstrative, difference, express, expression, form, information, intelligibility, language, modifier, noun, order, particle, phrase, phrases, phrasing, plural, preposition, pronoun, root, show, singular, speech, statement, term, verb, word, words
practical	9	777	0.36	activity, applied, convention, 'do, 'do', drill, drilling, drills, engage, exercise, exercises, functional, good, 'good, habit, heritage, knowledge, learn, much, normal, pattern, patterns, practical, practice, practiced, practices, practicing, pragmatics, preparation, proficiency, proficient, read, review, rule, skill, skills, study, take, training, usage, use, using, utility
verb	4	201	0.34	infinitive, modal, participle, verb, verbs
class	5	775	0.32	academia, case, class, 'class', classes, classifying, collection, conjugation, courses, domain, education, families, feminine, future, gender, group, instruction, masculine, number, past, patient, pedagogy, people, perfect, person, pick, present, refresher, separate, separately, separation, society, teaching, tense, world
correct	7	323	0.32	align, balance, carry, change, correct, correct', 'correct', corrected, correcting, correction, corrections, correctly, 'correctness', cover, focus, key, penalize, precise, right, 'right, service, set, setting, settings, strict, time
'he	3	88	0.32	'he, 'he', letter
helps	5	337	0.32	activity, adherence, aid, aids, appreciation, associate, attachment, auxiliary, benefit, better, boost, comfort, encourage, encouragement, endorsement, facilitate, facilitates, facilitators, guide, hand, help, helpful, helping, helps, improve, look, model, piece, promote, provide, reinforcement, resource, second, see, serve, served, serves, service, support, supportive, supports, tend, utility, w…
instead	7	109	0.32	alternative, alternatives, instead, rather
'old	4	269	0.32	age, familiar, must, 'old, past, preceding, used
part	4	883	0.32	assets, attachment, attempt, audio, backbone, balance, basis, bit, change, compound, concept, consonant, construct, context, departure, disconnect, discourse, divide, drill, effort, end, ending, environment, factor, fitting, form, formative, going, handle, highlight, input, interest, language, leave', line, making, memory, move, name, object, part, particular, piece, place, point, position, prepo…
often	5	93	0.31	frequency, frequent, frequently, much, often
teaching	8	801	0.31	activity, class, develop, drill, educated, education, educational, educators, ground, instruction, learn, learned, learning, lesson, pedagogy, phonics, prepare, refresher, reinforce, talk, teach, teaching, 'teaching, train
address	7	590	0.3	access, address, addressed, addressing, aim, align, apply, approach, ask, code, communicate, cover, covered, dealing, delivery, direct, directions, directly, discourse, discuss, employ, handle, handled, handling, instruction, place, point, present, question, reading, recognize, referring, speak, speaking, speaks, speech, talk, target, treating, use, welcome, wish
errors	6	126	0.3	confusion, deviation, error, error', 'error', errors, 'errors', literal, mistake, 'mistake', mistakes, 'mistakes, 'mistakes', slip, spot
initial	7	554	0.3	address, attempt, cover, discourse, discuss, first, found, handle, include, initial, initially, introduce, letter, make, people, prepare, set, spark, student
regional	8	372	0.3	areas, balance, clear, common, community, dependency, depth, development, domain, egypt, end, environment, finish, goal, hand, key, limit, lot, open, outside, part, place, possession, quick, range, regional, regionalisms, regionally, regions, section, separation, setting, slip, sole, space, state, zone
school	6	716	0.3	building, education, high, instruction, pedagogy, period, preparation, school, teaching, training
utility	7	250	0.3	change, exchange, program, service, used, utility
affirmed	8	179	0.29	affirmation, affirmed, judgment, maintain, positive, statement, statements, take, validate, yes
non	3	79	0.29	non, 'non
speakers	8	99	0.29	speaker, speaker', speakers, utterance, utterances, verbal
accents	7	355	0.27	accent, accents, action, background, emphasis, emphasize, emphasized, emphasizing, emphatic, express, focus, highlight, importance, masculine, pronounce, pronunciation, show, stress
good	4	439	0.27	acceptable, advantage, basic, beneficial, benefit, better, change, close, dependency, dependent, depending, depends, 'effect', effective, effectively, effectiveness, feature, full, future, good, 'good, great, honor, hot, intellectual, interest, irregular, line, load, near, number, respect, respected, respectful, respectfully, respecting, respective, right, 'right, safe, second, solid, sound, soun…
lesson	6	607	0.27	example, examples, exercise, instruction, lesson, lessons, meaning, pedagogy, significance, teaching
master	6	422	0.27	controlled, dominance, education, key, know, master, mastering, origins, perfect, student, subject
methods	7	179	0.27	methodology, methods, pedagogy, playing, program, system, vocabulary
rules	5	240	0.27	concept, construct, convention, conventions, dominance, find, finding, instruction, judge, judgment, law, limit, normal, normalize, normalizes, normally, order, pattern, patterns, powerful, practice, prescriptive, prevailing, principles, process, pronounce, regulated, regulations, rule, rules
'je	3	73	0.27	'je
major	5	422	0.26	age, better, leading, major, number, student, study, subject
positive	8	737	0.26	address, adjective, advantage, advantages, adverb, aim, align, attitude, back, balance, business, confident, confirmed, cover, develop, direct, end, even, first, formal, formation, front, function, ground, insist, introduce, job, landscape, lead, level, line, list, load, move, order, part, perspective, place, placement, places, 'plus, point, pose, position, positioned, positioning, positive, posi…
discuss	7	612	0.25	address, argumentation, audience, communicating, communication, cover, discourage, discourse, discuss, discussing, discussion, discussions, handle, interview, language, lead, participant, recognition, see, session, speech, talk, word, words
extensive	9	601	0.25	big, education, extensive, instruction, large, large', largely, largely', 'largely', meaning, pedagogy, referring, teaching, wide, widely
intellectual	12	393	0.25	good, intellectual, master, mind, reflective, student
job	3	637	0.25	activity, application, book, business, difficulty, education, employ, engage, engagement, game, instruction, job, law, line, literature, pedagogy, place, position, post, problem, production, service, situation, spot, task, tasks, teaching, walk, work
process	7	862	0.25	acquisition, activity, affect, alternative, appreciation, assessment, attention, awareness, breathing, citation, connection, construction, culture, developing, development, distinction, education, explanation, feeling, handle, impact, integration, judgment, know, knowing, knowledge, language, learning, manage, memorization, memory, notice, perception, phenomenon, pick, preparation, prepared, proc…
provide	7	245	0.25	allow, allowing, allows, careful, carry, connection, engage, equip, give, help, key, leave', long, lot, offer, offered, offering, offers, open, power, prepare, provide, provided, provides, providing, range, ready, serve, set, support, tool
cultural	8	173	0.24	appreciation, attitude, cultural, culturally, culture, cultures, finish, finished, polite, politely, politeness, social, society
meaning	7	381	0.24	aim, apply, associate, based, close, closing, connect, content, convey, core, express, get, idea, identify, implied, implies, importance, important, intending, lesson, link, list, mean, meaning, meanings, means, mention, name, necessitate, norm, normal, nuance, number, point, poor, purpose, recall, relate, remember, represent, sense, significance, significant, significantly, state, subtlety, thin…
modules	7	659	0.24	ability, attention, change, correct, delivery, focus, focusing, intonation, language, memory, modules, mouth, power, regulated, regulations, retention, sense, sensitivity, set, speak, speech, study, talk, tone, transition, understanding, vary
formal	6	289	0.23	convention, conventions, formal, 'formal, formal', formality, formalized, formally, literary, nominal, official, pattern, positive, practice, state, states, valid, validate, validated, validates, validating, validation, validity
standard	8	505	0.23	acceptable, activity, assess, baseline, basic, benchmark, changer, classical, common, currency, exchange, ideal, modifier, norm, normal, normalize, normalizes, normally, post, regular, similar, similarities, standard, standard', 'standard', standardisms, standardization, standards, status, textbook, value
training	8	594	0.23	activity, address, aim, conditional, contain, develop, developed, developing, development, direct, directions, directly, drill, educated, education, educational, educators, exercise, learn, level, place, point, position, practice, preparation, prepare, prepared, prepares, preparing, read, review, school, study, take, takes, target, teach, train, trained, training
understanding	13	540	0.23	agreement, agreements, appreciate, appreciation, believe, clarity, clear, clearly, coherence, comprehend, comprehensibility, comprehensible, comprehension, convention, find, focus, follow, get, grasp, guess, intelligibility, interpretation, knowing, perceive, perceived, read, reading, realized, reasoning, recognition, see, seeing, sense, statement, take, tendency, translate, translated, translati…
works	5	812	0.23	acquisition, action, activity, acts, aid, analysis, application, apply, attention, become, bring, business, comparing, comparison, complex, create, difficulty, effort, employ, engagement, exchange, exercise, exercises, experiment, fatigue, function, get, guess, handle, handling, help, job, learning, line, make, manage, move, output, part, place, playing, plays, position, practical, prepare, produ…
common	6	498	0.22	class, common, commonly, everyday, familiar, frequent, general, informal, mutual, normal, normalize, normalizes, normally, popular, shared, standard, usually, vernacular
direct	6	519	0.22	address, aim, attitude, conduct, content, create, dealing, direct, directions, directly, empowerment, give, guidance, guide, guided, guides, guiding, hand, handle, handling, immediate, immediately, instruction, lead, leading, leads, make, manage, managed, management, managing, move, name, navigate, now, order, organizations, point, pointing, points, primary, rule, sheer, show, subject, take, take…
forms	5	448	0.22	ability, become, build, building, builds, change, class, 'class', classes, core, courses, figuring, form, forming, forms, framed, framing, influence, mode, model, organizations, pattern, patterns, person, plural, point, root, section, shapes, singular, state, structure, variants, way, word, work, works
functions	9	390	0.22	exercise, formal, formality, function, functional, functions, identity, map, official, opening, performance, practical, serve, served, serves, translation, useful, work, works
mood	4	128	0.22	imperative, indicative, interrogative, modal, mode, mood, moods, subjunctive
nuances	7	101	0.22	meaning, nuance, nuanced, nuances, significance, subtlety
variations	10	163	0.22	activity, change, departure, deviation, difference, idea, inversion, replacement, switch, thing, type, variants, variation, variations, version
writing	7	820	0.22	access, activity, acts, address, analysis, article, book, brief, close, closing, code, communicate, correction, create, credential, describe, development, end, ending, essay, form, hand, instruction, issue, job, judgment, key, language, law, lead, letter, line, literature, make, manifest, mark, natural, note, notice, opening, order, orthography, paragraph, pen, place, point, power, program, prove…
bored	5	99	0.21	bored, boring, boring', 'boring', drill, drilling, drills, production, tired, tired'
context	7	131	0.21	context, contexts, discourse, set, setting, settings
need	4	194	0.21	ask, asked, asking, demanding, essential, inevitably, involves, lack, motivate, motivating, motivation, necessarily, necessary, necessitate, necessity, need, needed, needs, require, required, requirements, requires, requiring, take, takes, want, 'want, want', wanted
sound	5	342	0.21	audio, consonant, coo, deep, dental, depth, full, go', going, going', good, guttural, heavy, intelligibility, look, looked, music, nasal, prepare, pronounce, reasoning, register, safe, seem, solid, sound, sounded, sounding, 'sounding, sounds, speak, stop, strength, strong, tone, valid, voice, vowel
workshops	9	69	0.21	class, work, workshops
judge	5	708	0.2	abstract, acknowledge, align, allow, anticipate, appreciate, assess, bank, believe, book, buy, challenge, clear, construct, deny, develop, discourage, doubt, embrace, except, feel, find, guess, identify, ignore, include, internalize, judge, 'judge', judgment, know, like, make, mark, mind, object, official, order, place, prioritize, promote, pronounce, range, recognize, recommend, rely, respect, r…
materials	9	181	0.2	action, activity, complex, compound, crucial, desire, end, felt, filler, ground, happened, happens, information, issue, manifest, materials, outcome, particle, pass, preparation, real, 'real', reality, relevance, tapestry, train
think	5	744	0.2	abstract, acknowledge, add, agreement, aim, align, allow, analysis, anticipate, argumentation, assess, associate, believe, book, change, chart, class, compare, connect, construction, derivation, differentiate, direct, discourage, divide, embrace, experiment, explanation, factor, feel, figuring, find, focus, give, guess, hear, idea, identify, ignore, integrate, internalize, interpretation, introdu…
whole	5	639	0.2	access, approach, article, balance, basic, bridge, build, building, case, complex, compound, concept, connection, connective, construct, construction, cover, entire, face, felt, form, full, future, gap, good, ground, guide, individual, integral, issue, lead, leading, level, life, line, load, master, means, mouth, native, object, one, opening, pattern, person, piece, production, range, relative, r…
influences	10	410	0.19	backbone, carry, causing, determiners, exposure, form, grasp, impact, influence, influenced, influences, influencing, issue, make, outcome, power, regulated, regulations, shapes, support, time, use, variation, work, works
like	4	334	0.19	careful, carefully, comparative, comparatives, compare, compared, comparing, comparison, desire, form, kind, like, 'like, like', likely, love, please, potential, potentially, prefer, preference, prospective, see, similar, similarities, tendency, variety, view, want, wish
organizations	13	337	0.19	activity, bank, business, class, community, core, foundation, game, handle, hands, individual, law, lingua, manage, management, native, opening, order, organizations, person, relative, school, section, service, shift, society, state, structure, structured, system, tongue, tool, university, young
critical	8	374	0.18	analysis, correct, correction, critical, critically, crucial, decision, fire, important, judge, notice, pan, pick, professional, review, slang, speech, static, vital, writing
development	11	521	0.18	age, arising, become, better, broadening, build, change, cohesion, create, culture, develop, developed, developing, development, differentiate, evolution, evolve, evolved, evolving, exercise, find, follow, get, getting, habit, improve, improved, make, modern, origins, pass, phenomenon, produce, progress, root, section, usage, use
move	4	813	0.18	access, acts, affect, 'affect', affecting, affects, aim, alienate, anticipate, approach, approaching, associate, attach, attempt, boost, bring, carry, chance, change, close, closing, clue, coming, communicate, conduct, connect, continue, convey, decision, develop, direct, disconnect, divide, double, drill, engage, essay, exchange, exclude, express, face, filter, fire, flow, get, give, ground, han…
acceptable	10	594	0.17	acceptable, accepted, acknowledge, acknowledged, acquisition, agree, allow, attitude, bank, believe, buy, clear, embrace, get, give, good, have', 'have', honor, judge, know, let, look, okay, open, pass, receptive, recognition, recognize, recognized, rely, sense, situation, stand, standard, support, take, takes, understand, welcome
also	4	45	0.17	also, 'too
application	11	425	0.17	action, applicability, applicable, application, applications, cover, covered, effort, exercise, job, practical, program, relevance, relevant, usage, use
challenge	9	132	0.17	challenge, challenges, challenging, difficult, hard, king, object, question, situation
controlled	10	624	0.17	account, accounts, activity, aim, conduct, contain, controlled, direct, dominance, dryness, embrace, ensure, essay, fast, grasp, guidance, guide, handle, keep, lead, manage, master, mind, possession, power, process, register, retention, rule, see, standard, subject, switch, tend, tool, train, try, work
features	8	87	0.17	article, aspect, attention, carry, faced, feature, feature', features, featuring, hand, have', 'have', read, take
fitting	7	404	0.17	able, acceptable, activity, adapt, agree, competence, correct, cover, fits, fitting, form, function, just, making, meeting, meets, mode, point, serve, set, suitable, way
acknowledging	13	156	0.16	accepted, acknowledge, acknowledged, acknowledgement, acknowledges, acknowledging, appreciate, appreciation, citation, communicate, content, given, greeting, hello, know, know', knowing, mention, mentions, note, notice, noticed, pass, recognition, recognize, recognized, referring, response, welcome, wish
alternatives	12	311	0.16	alternative, alternatives, change, exchange, learn, memorize, replacement, secondary, substitute, substitutions, switch, switched, switching, vary
auxiliary	9	311	0.16	aid, aids, auxiliaries, auxiliary, help, secondary, supportive
colloquial	10	120	0.16	colloquial, 'colloquial', colloquialisms, conversation, conversely, expression, informal, information, informed, informs
diversity	9	272	0.16	activity, deviation, deviations, different, diverse, diversity, fair, fun, game, interest, phrase, presentation, show, showing, variation, various
formation	9	365	0.16	action, activity, bank, change, constitutes, deep, formation, formative, information, initial, initially, line, mouth, organizations, placement, point, range, secondary, set, shapes, uphill
go'	3	580	0.16	address, agree, approach, back, become, belonging, bridge, carry, change, clear, close, compare, continue, correct, cover, departure, double, fits, fitting, follow, function, functional, functions, get, getting, go', going, going', journey, lead, leading, leads, leave', live, lived, lives, living, 'living', make, move, near, open, overhaul, pan, pass, post, process, progress, range, recognize, sc…
grammatical	11	44	0.16	grammatical, grammatically
period	6	305	0.16	age, bit, daily, day, end, ending, even, full, hour, issue, life, may, moment, number, pass, past, period, piece, review, rhythm, rule, school, second, sentence, session, shift, term, time, times, value, years
pronouns	8	70	0.16	demonstrative, pronoun, pronouns, reflexive
secondary	9	298	0.16	alternative, auxiliary, formation, indirect, minor, secondary, substitute, utility
see	3	586	0.16	abstract, appreciate, associate, believe, carry, case, comprehend, considered, considering, contrast, encounter, examining, experience, experiences, experiment, fear, feel, figuring, find, finding, identify, include, interpretation, know, like, live, look, looked, make, meeting, meets, notice, perceive, perception, read, regarding, respect, review, search, see, seeing, take, tend, think, understa…
social	6	127	0.16	change, cultural, fostering, interact, international, meeting, nature, prepare, ready, set, social, socially, societal
substitutions	13	320	0.16	artificial, change, cover, double, equivalent, exchange, peer, reduce, replacement, secondary, shift, substitute, substitutions, utility, work
bien'	5	44	0.16	bien, bien'
ability	7	570	0.15	abilities, ability, acquisition, attention, competence, creativity, depth, form, grasp, hand, judgment, knowledge, language, literacy, memory, methodology, mind, pedagogy, power, powerful, proficiency, range, resource, retention, sense, sensitivity, skill, speech, strength, system, understanding, voice
adjectives	10	90	0.15	adjective, adjectives, comparative, modifier, positive
authentic	9	53	0.15	authentic, authentic', authenticity, credibility, demonstrate, documents, legitimacy, manifest, mark, marking, validation
indirect	8	280	0.15	indirect, process, secondary
internalize	11	200	0.15	acquisition, foreign, global, incorporate, incorporating, internal, internalize, internalizing, internally, international, internationally, learning, national, outside, range, work, world
minor	5	304	0.15	age, 'child', 'childs', minor, number, secondary
particularly	12	272	0.15	careful, detailed, focus, focusing, highlight, part, particular, particularly, primary, specialized, specializing, specific
present	7	271	0.15	attitude, currency, current, demonstrate, demonstrated, demonstrates, demonstrating, demonstrative, existing, exposure, face, faced, give, gives, immediate, interpretation, introduce, moment, mouth, now, performance, place, playing, pose, position, present, presentation, presentation', presentations, presented, presenting, production, program, recognize, represent, represents, set, short, shortly…
pronunciation	13	415	0.15	accent, articulation, language, pronunciation, pronunciations, speech, utterance
syntax	6	107	0.15	grammar, syntax, system
tenses	6	115	0.15	affect, change, future, past, perfect, present, stress, tense, tenses, tone
c'est	5	40	0.15	c'est, 'c'est, 'c'est'
'they	5	41	0.15	'they, 'they'
articulation	12	193	0.14	articulated, articulation, articulatory, connect, connection, fluent, lingua, link, pronunciation, provide, speaker, state, stifle, tongue
attitude	8	275	0.14	address, attention, attitude, attitudes, culture, devices, landscape, perspective, pose, position, positioned, positioning, positive, positively, preference, prejudice, presentation, recognition, respect, set, stand, tendency, understanding, view
believe	7	498	0.14	abstract, anticipate, appreciate, authenticity, bank, believe, buy, carry, considered, considering, credibility, fear, feel, identify, include, judge, legitimacy, like, likely, look, make, rely, respect, see, think, 'think, 'think', thinking, understand, validity, value, view
books	5	236	0.14	acts, book, books, 'books, books', collection, engage, engaged, engagement, engaging, fine, guide, job, lexicon, mark, production, proverbs, register, scenario, script, section, text, textbook, vocabulary, volume, work
comparative	11	163	0.14	adjective, adverb, analyze, comparative, comparatives, compare, compared, comparing, comparison, contrast, equivalent, equivalents, relatable, relate, related, relating, relation, relative, relatively, relativity, study
drill	5	335	0.14	develop, drill, drilling, drills, learn, preparation, prepare, teach, tool, train, trained, training
focus	5	335	0.14	accent, adapt, align, clarity, correct, direct, directions, directly, emphasis, focus, focused, focuses, focusing, hear, point, recall, set, stress, think
know	4	431	0.14	anticipate, appreciation, awareness, comprehension, differentiate, experience, experiences, experiment, feel, find, grasp, informed, intention, intentionally, know, know', knowing, knowledge, live, lived, lives, living, 'living', love, master, recall, recognition, recognize, remember, see, sense, separate, take, think, understanding
object	6	441	0.14	article, audio, backbone, bit, challenge, communicating, communication, concrete, construction, content, except, filler, good, handle, input, judgment, life, line, lot, love, making, mind, neutral, object, objective, objects, opening, part, piece, real, resistance, section, segment, slip, structure, thing, way, whole
patterns	8	377	0.14	agree, designed, example, figuring, mark, marking, model, modeled, modeling, modelled, models, pattern, patterns, pinpoint, program, spot, standard
perception	10	284	0.14	appreciate, appreciated, appreciation, appreciative, aspect, background, contrast, culture, exposure, feeling, finish, ground, knowledge, listening, look, music, notice, noticed, perception, perceptions, seeing, sense, sensitivity, sound, subtle, tangible, tone, understanding, view
phonemes	8	84	0.14	phonemes, phonological, phonology, sound
register	8	141	0.14	affect, book, entry, list, post, read, reading, register, 'register', registers, review, show, showed, showing, shows, tone
resources	9	91	0.14	aid, asset, assets, help, keep, living, resource, resources, support
action	6	399	0.13	action, actionable, actions, actively, activities, activity, application, approach, approaching, attention, battle, broadening, change, closing, coming, connection, decision, effort, emphasizing, ending, engagement, entry, exchange, feedback, finish, flow, formation, going, increase, intention, interaction, interplay, inversion, move, opening, pass, performance, pick, placement, playing, politene…
advanced	8	337	0.13	advanced, advantage, approach, approachable, approaches, approaching, better, boost, carry, clear, develop, development, encourage, encouraged, encouragement, encourages, encouraging, foster, front, gentle, get, help, high, improve, increase, later, lead, make, move, overhaul, pass, prefer, process, progress, promote, promotes, promoting, set, support, walk
areas	5	264	0.13	areas, classroom, clear, compound, construction, core, countries, domain, domains, front, issue, keep, key, open, pen, place, safe, section, see, separation, slip, space, spheres, structure, study, subject, topic, well
conditional	11	332	0.13	absence, acquisition, anxiety, better, case, clear, conditional, dependency, dependent, desire, improve, information, inversion, learning, mode, participation, pass, place, position, process, provide, purity, roots, shapes, situation, standardization, statement, status, term, terms, way
connected	9	293	0.13	adhere, applicability, articulation, attach, attached, attachment, bridge, close, code, coherence, cohesion, communication, compound, comprehension, confuse, conjunctions, connect, connected, connecting, connection, connections, connective, continue, continued, continuous, cover, encounter, engaged, fair, ground, input, interact, introduce, know, link, linking, love, mark, meeting, online, piece,…
continue	8	395	0.13	activity, book, carry, coherence, cohesion, constant, continue, continued, continuous, cover, covered, habit, keep, long, maintain, make, move, period, persistent, recurring, remains, repeated, repetition, rule, script, speak, take, talk, usage, use, value
frequent	8	250	0.13	common, frequent, frequently, prevailing, prevalent, regular, support, verb
happened	8	465	0.13	anticipate, approach, approaching, associate, background, bit, case, chance, change, coo, decision, delivery, departure, develop, development, deviation, difference, easing, encounter, end, ending, engagement, error, example, experience, finish, fire, flow, flowing, give, going, happened, happens, impact, increase, instance, interference, inversion, issue, meeting, mix, open, opening, outcome, pa…
'inferior	9	184	0.13	common, disadvantage, 'inferior, less, low, small, utility
learners	8	50	0.13	assimilation, learner, learners, study
relative	8	260	0.13	affect, akin, apply, associate, associated, attach, attached, balance, comparative, connect, connected, connecting, connection, connections, connective, dealing, formation, identify, interact, interest, issue, link, linking, list, mean, mention, name, placement, position, possession, referring, relatable, relate, related, relating, relation, relative, relatively, relativity, remember, root, siste…
sentence	8	171	0.13	interrogative, life, question, sentence, sentences, term, time, times
settings	8	476	0.13	action, activity, assess, background, change, collection, conjugation, contrast, core, correct, determiners, differentiate, 'do, 'do', domain, environment, equip, exercise, fits, fitting, group, guess, hard, identify, judge, know, local, lot, make, mark, marked, marking, place, placement, places, pose, position, positioning, prepare, present, range, ready, represent, right, rigid, 'rigid', rigidl…
statement	9	364	0.13	abstract, account, affirmation, agreement, brief, citation, clarification, construction, content, derivation, error, explanation, expression, feedback, idea, input, interpretation, literal, mention, mistake, negation, note, notice, particular, program, reading, reply, response, review, statement, statements, term, thing, understanding, version, word
university	10	175	0.13	collection, content, convention, exist, existence, existing, general, generally, nature, normal, pattern, rule, universally, university, world, 'world
media	5	34	0.13	media
towards	7	35	0.13	toward, towards
'alive'	7	108	0.12	actively, activities, activity, 'alive, 'alive', aware, existence, existing, life, live, lived, lives, living, 'living', sensitive, vital
articles	8	68	0.12	article, articles, feature, lead, personal, piece, section, separate, service
comprehension	13	185	0.12	accessible, approachable, comprehend, comprehensibility, comprehensible, comprehension, extensive, full, general, inclusive, large, large', largely, largely', 'largely', understandable, understanding, wide
conjugations	12	74	0.12	change, class, compound, conjugation, conjugations, conjunctions, mix, paired, pairs, service, set
discourse	9	210	0.12	address, chat, context, conversation, conversely, discourse, interview, question, speak, speech, talk
ensuring	8	108	0.12	controlled, cover, ensure, ensures, ensuring, make, see, seeing
explain	7	116	0.12	clear, demystify, explain, explained, explaining, illustrate, instance, interpretation, state
just	4	166	0.12	fair, fairly, fitting, good, 'good, hard, just, precise, right, 'right, simply
plays	5	534	0.12	action, activity, acts, apply, approach, attempt, back, change, cover, develop, double, effort, employ, exercise, follow, fun, game, games, interference, lead, move, natural, pass, pick, playing, plays, promote, register, repeat, see, serve, service, set, show, sound, starting, switch, take, takeaway, tongue, try, usage, use, vice, walk, work
preparation	11	298	0.12	activity, agreement, change, compound, create, equipped, homework, homework', make, organizations, plans, preceding, preparation, preparatory, prepare, prepared, preparedness, prepares, preparing, provide, ready, set, setting, settings, sound, thinking, thought, willing, work
right	5	328	0.12	abstract, access, appropriate, change, due, far, hand, interest, just, law, legitimate, outside, place, position, power, powerful, right, 'right, truly, use
signs	5	521	0.12	address, balance, benchmark, citation, communicate, communicative, construction, experience, honor, initial, input, language, letter, mark, marking, mention, notice, number, output, part, place, pose, position, post, recall, set, signs, spot, structure, target, type, validate, write
specific	8	130	0.12	limited, particular, particularly, specific, specifically
styles	6	430	0.12	accent, address, analysis, appreciation, classical, create, delivery, emphasis, expression, fluency, form, idiom, instruction, intonation, inversion, kind, make, name, note, phrasing, poetry, process, repetition, rhythm, speech, stress, styles, tone, tongue, tool, variety, write
tired'	6	66	0.12	bored, consume, fatigue, tired, tired'
want	4	224	0.12	absent, desire, desired, hot, lack, lacked, like, long, need, please, private, privately, search, want, 'want, want', wanted, wish
associated	10	185	0.11	associate, associated, class, connect, connected, connecting, connection, connections, connective, familiar, interact, memory, order, participant, peer, relationship, remembering, see, sister, society, walk
basic	5	403	0.11	basic, basics, essential, essentially, first, good, primary, standard
clarified	9	131	0.11	change, clarified, clarifying, clear, demystify, describe, explain, illustrate, instance
especially	10	39	0.11	especially, except, exceptions, particular, particularly, specialized, specializing
essential	9	181	0.11	essential, essentially, importance, must, necessary, necessity, need, primary, require, required, requirements, requires, requiring, vital, want
existing	8	161	0.11	actual, actually, breathe, effective, exist, existence, existing, flow, historical, inhabit, life, live, lived, lives, living, 'living', objective, presence, present, real, 'real', reality
give	4	529	0.11	accent, acknowledge, aim, allow, apply, appropriate, back, bank, breathe, buy, carry, change, communicate, consume, convey, create, dedicate, emphasize, equip, express, get, give, gives, guess, hand, help, introduce, judge, key, lead, leave', let, look, lot, make, mean, move, offer, offering, open, pass, phrase, pick, place, power, present, provide, range, recognize, represent, serve, set, show, …
importance	10	331	0.11	accent, account, big, crucial, emphasis, essential, focus, foreign, good, great, heavy, importance, important, key, main, master, mean, moment, primary, significance, stress, transfer, value
interrogative	13	189	0.11	ask, examining, interrogative, interview, mode, mood, question, questions, sentence
less	4	51	0.11	less, 'less
negation	8	99	0.11	demonstrate, deny, differ, negation, negations, negative, negatively, negatives, neutral, 'neutral', show, statement, tendency, vary
others	6	162	0.11	difference, different, distinct, distinction, distinctions, new, others, past, separate, separately, separation
shows	5	372	0.11	benefit, bit, conduct, demonstrate, designed, direct, expose, exposure, face, fair, feature, give, guide, illustrate, indicative, interpretation, lead, manifest, map, model, number, open, performance, point, pointing, points, pose, present, presentation, produce, production, program, proving, read, reflect, register, represent, review, show, showed, showing, shows, take, variety, view, viewing, v…
sociolinguistics	16	61	0.11	linguistics, sociolinguistic, sociolinguistics
texts	5	324	0.11	book, filler, language, letter, line, note, speech, text, textbook, textbooks, texts, words
transfer	8	447	0.11	acknowledge, acquisition, alienate, allow, apply, bank, bring, buy, carry, change, changes, clear, communicate, connection, convey, conveyed, conveying, dealing, delivery, equip, exchange, express, get, give, hand, help, key, learning, let, load, lot, move, offer, pass, pick, post, power, present, process, provide, register, second, serve, service, shift, shifting, shifts, slip, substitute, suppo…
utterance	9	201	0.11	accent, articulation, coo, interjection, low, pronunciation, repeat, speaking, speech, utterance, utterances
world	5	126	0.11	academia, class, domain, domains, global, globalized, globally, group, human, humanizes, international, part, people, piece, realities, reality, world, 'world
absolutely	10	101	0.1	absolutely, abstract, arbitrary, direct, dominance, limit, living, perfect, 'perfect', perfectly, sheer, utterance, utterances
accessible	10	276	0.1	access, accessible, accessing, acquisition, address, agreement, approach, approachable, approaches, approaching, code, coming, comprehensible, entry, find, gateway, increase, make, opening, right, way
'an'	4	29	0.1	'an, 'an', ans', associate
ask	3	293	0.1	address, ask, asked, asking, challenge, communicate, direct, expectations, expected, interview, notice, offer, order, phrase, question, recall, requests, require, required, requirements, requires, requiring, wish, word
collection	10	234	0.1	book, case, class, collection, conjugation, content, core, due, fair, gender, get, hand, information, law, lot, number, person, pick, post, range, repertoire, set, stand, take, tense, train, variety
conventions	11	163	0.1	community, convention, conventions, formal, meeting, traditional
effectively	11	265	0.1	action, actual, carry, change, core, 'effect', effective, effectively, effectiveness, feeling, get, impact, influence, issue, issues, make, mark, meaning, move, outcome, power, reaction, response, resulting, significance, strength, validity, variation
egyptian	8	66	0.1	african, cairene, egyptian
entity	6	314	0.1	chance, change, communication, content, depth, entity, filler, form, group, heritage, individual, knowledge, lot, motivation, need, object, part, person, phenomenon, position, possession, process, relation, space, state, subject, thing, time, whole, world
friends	7	94	0.1	associate, connection, familiar, friends, friends', informal, social
heritage	8	242	0.1	acquisition, background, education, heritage, practice, training
interested	10	116	0.1	benefit, consume, engage, fascinating, fire, interest, interested, interesting, interesting', interests, involves, part, power, pursuits, relate, right, thing, world
leading	7	283	0.1	activity, advantage, boost, direct, discuss, encourage, get, give, guidance, guiding, lead, leading, leads, leave', major, make, mean, move, necessitate, place, position, preceding, promote, resulting, section, slip, tracks
learning	8	311	0.1	acquisition, assimilation, conditional, determiners, drill, educated, education, exercise, find, hear, know, know', knowing, knowledge, learn, learned, learning, letter, mastering, memorable, memorization, memorize, practice, prepare, read, reading, rote, school, see, seeing, studies, study, take, takes, train, transfer, work
limited	7	211	0.1	content, determiners, disadvantage, end, ending, limit, limitations, limited, minor, modified, modifier, name, number, range, reduce, rule, select, set, setting, settings, small, specialized, specializing, specific, take, view
modeling	8	235	0.1	beauty, example, examples, expose, form, framework, frameworks, guide, help, ideal, kind, model, modeled, modeling, modelled, models, pattern, pose, represent, theory, variety, work
nouns	5	30	0.1	gerund, noun, nouns
's'	3	31	0.1	letter, 's', second
saying	6	317	0.1	account, add, chance, convey, explain, express, feature, give, introduce, maintain, mention, move, note, notice, present, read, reading, recommend, register, reply, represent, 'say', saying, sentence, show, state, states, support, take, 'tell'
support	7	295	0.1	accompanied, activity, adherence, agree, aid, allow, appreciation, attachment, auxiliary, back, backbone, based, boost, bridge, carry, dependent, documents, embrace, encourage, encouraging, endorsement, foster, foundation, frequent, friends, friends', give, help, influence, lead, let, look, part, post, promote, provide, reinforcement, represent, rest, second, see, serve, stand, support, supportiv…
'ah	3	28	0.1	'ah
background	10	133	0.09	accent, aspect, background, backgrounds, emphasize, ground, heritage, information, interference, set, setting, settings, showcase, stress, view
better	6	229	0.09	advanced, aid, benefit, best, better, 'better, better', 'better', build, change, close, comfort, develop, enhance, enrich, fitting, good, help, improve, improved, improving, major, perfect, piece, point, set, shift, sole
connectors	10	58	0.09	attachment, backbone, connect, connected, connecting, connection, connections, connective, connectors, ground, lead, line, point, short
facts	5	203	0.09	basics, book, case, concept, construct, facts, general, information, particular, point, reality, respect, specific
ideal	5	393	0.09	abstract, appreciation, beauty, example, idea, ideal, 'ideal', idealized, model, pattern, perfect, see, standard, thought, value, view
institutions	12	167	0.09	bank, bring, constitutes, create, found, foundation, institutions, make, order, pen, school, service, university, utility
large	5	87	0.09	big, big', bigger, bigly', deep, double, extensive, great, huge, immense, important, large, large', largely, largely', 'largely', larger, monolithic, mostly, prominent, rhetorical, significant, vast, wide
level	5	213	0.09	aim, balancing, building, construction, depth, direct, emphasis, even, high, level, levels, low, point, pointing, points, setting, speak, stand, strength, structure, take, talk, train
life	4	182	0.09	account, existence, history, life, period, sentence, spark, time, years
might	5	49	0.09	might, power, powerful, strength
natural	7	185	0.09	adapt, born, change, courses, entry, existence, explain, foreign, natural, naturally, nature, normal, pattern, practice, quiet, resistance, spontaneous, success, type, willingness, world
nominal	7	182	0.09	case, constitutes, formal, minimal, name, nominal, phrase, status
notice	6	176	0.09	asking, attention, 'comment, correct, mark, marked, marking, mention, mind, note, notes, notice, noticed, official, pan, pick, post, pronounced, remarks, review, strong
offer	5	187	0.09	attempt, content, effort, give, go', going, going', move, offer, offered, offering, offers, pass, produce, provide, question, try
official	8	168	0.09	business, change, confirmed, elder, formal, formalized, judge, official, performance, prescribers, regular
phrasal	7	25	0.09	phrasal
points	6	372	0.09	address, advantage, aim, back, cairo, close, core, deep, derivation, detailed, direct, end, ending, factor, finish, first, focus, front, ground, high, indicative, lead, limit, line, mark, meaning, meeting, moment, object, objective, part, period, pinpoint, place, point, pointing, points, position, post, preposition, relevance, respect, right, root, second, setting, show, significance, situation, …
production	10	280	0.09	book, boring, culture, double, drilling, feature, good, irregular, issue, job, line, load, making, number, outcome, output, pick, presentation, production, rich, second, set, volume, work
reading	7	376	0.09	anticipate, indicative, interpretation, language, mouth, read, reading, see, speak, speaking, take, takes, talk, understand, version
reasoning	9	369	0.09	account, add, analysis, anticipate, argumentation, assess, causing, class, derivation, differentiate, divide, explanation, factor, fair, fairly, feel, find, give, ground, group, guess, integrate, judge, line, make, place, present, process, reasoning, represent, separate, set, sound, support, think, thinking, thought
referring	9	322	0.09	action, apply, benchmark, book, class, direct, express, give, guide, identify, lexicon, list, mark, mean, meaning, name, number, pen, recall, recommendation, referring, separate, significance, source, state, subject, target, term, vocabulary, write
speaking	8	309	0.09	address, chat, communicate, continue, coo, discourse, discuss, interview, lead, level, mouth, place, present, question, read, reading, slang, sound, speak, speaking, speaks, speech, talk, tone, utterance, utterances, verbal
state	5	142	0.09	diversity, explicit, expressed, face, feeling, fluency, form, professionalism, proficiency, solid, state, states
strength	8	49	0.09	might, power, strength, validity
system	6	198	0.09	general, lan, line, link, order, organizations, program, structure, syntax, system, systematically, systemic, systems, vocabulary
take	4	388	0.09	abstract, action, apply, appropriate, attach, become, bring, buy, carry, change, clear, conduct, contractions, convey, conveyed, conveying, cover, dedicate, delve, employ, erase, experience, filled, films, find, follow, get, getting, ground, limit, mark, move, name, pick, recall, root, select, selecting, selections, set, stop, take, takes, use, work
thing	5	281	0.09	abstract, action, aim, articulation, back, behind, change, content, entity, feature, object, objective, process, situation, small, statement, structure, subject, system, target, thing, things, variation
usage	5	467	0.09	habit, language, pattern, practice, usage, use
varied	6	94	0.09	adapt, change, changes, deviation, deviations, differ, divergences, move, multifaceted, pass, varied, varies, various, vary, varying, versatile
très	4	24	0.09	très, 'très
voudrais'	9	25	0.09	voudrais, voudrais'
without	7	23	0.09	without
acquisition	11	128	0.08	ability, acquisition, aid, buy, enrichment, getting, heritage, literacy, offering, possessive, power, present, skill, skills
carry	5	299	0.08	appropriate, balance, boost, bring, carries, carry, carrying, communicate, conduct, contain, continue, convey, conveyed, conveying, correct, encourage, feature, follow, ground, include, influence, move, pass, pose, post, produce, promote, range, shift, support, take, takes, transfer, work
choices	7	91	0.08	action, alternative, alternatives, choices, decision, default, fine, intention, move, opening, options, pick, preference, recognition, select, selecting, selections, way, willing, wish
clear	5	252	0.08	allow, benefit, change, clarification, clarity, clear, clearly, comprehensibility, create, distinct, distinction, distinctions, fair, focus, improved, judge, let, make, okay, open, opening, openly, opens, overhaul, pass, perfect, pronounce, take
coherence	9	91	0.08	adhere, adherence, coherence, coherent, cohesion, cohesive, comprehensibility, connection, consistent, consistently, link, order, stick, sticking
consonants	10	84	0.08	consistent, consonant, consonants, dental, guttural, letter, nasal, sound, stop
contrastive	11	150	0.08	comparing, comparison, contrast, contrasting, contrastive, differ, different, differentiate, distinction, line, range, seeing, separate
distinction	11	237	0.08	clarity, classifying, clear, contrast, difference, different, differentiate, differentiated, distinct, distinction, distinctions, distinguishes, distinguishing, focus, king, line, note, notes, separate, separately, separation, specialized, specializing, typically
feel	4	264	0.08	awareness, believe, comprehend, experience, experiences, experiment, feel, feeling, feels, find, finding, flavors, idea, look, looked, perceive, perception, presence, search, see, seem, sense, sensitivity, slip, state, think, thought, tone, touched
framed	6	261	0.08	application, build, construct, exposure, framed, framework, framing, make, part, phrase, section, system, vocabulary, word
happy	5	36	0.08	belonging, happy, happy', willing
include	7	107	0.08	add, carry, comprehend, contain, cover, embrace, include, includes, including, incorporate, rest, see, view
infinitive	10	114	0.08	infinitive, space, uncountable, verb
'it	3	21	0.08	'it, it', 'it'
many	4	21	0.08	many
number	6	234	0.08	acts, add, balance, bit, book, comes, coming, constant, difference, factor, figuring, find, first, frequency, game, identify, issue, issues, lead, limit, list, love, make, name, nine, number, one, performance, prevalence, real, root, single, three, two, unity
participant	11	119	0.08	actively, activities, activity, associate, back, end, engage, engaged, engagement, engaging, hand, involves, king, move, participant, participate, participation, status, young
piece	5	178	0.08	article, bit, compound, confuse, create, end, feature, helping, king, lead, make, music, part, personal, phrase, piece, separate, study, time, train, transition, upper
plural	6	159	0.08	dual, form, pattern, plural, plurals, practice, structure
post	4	363	0.08	collection, communicating, communication, delivery, express, list, mark, place, position, post, register, standard, transfer
prepositions	12	26	0.08	place, position, preposition, prepositional, prepositions
programs	8	103	0.08	application, curriculum, game, idea, information, job, pattern, performance, plans, program, programs, show, system, thought, utility
pronounced	10	168	0.08	accent, articulated, articulation, clear, find, judge, 'judge', mark, marked, marking, pronounce, pronounced, rule, 'say', saying, sound, stress, tout, voice
rather	6	46	0.08	prefer, preference, preferred, prefers, quite, rather
regular	7	306	0.08	balance, even, frequent, normal, official, regular, regularly, regulated, regulations, rhythm, standard, status, system
replied	7	63	0.08	feedback, mouth, replied, reply, response, responses, statement
respect	7	170	0.08	attitude, content, fear, honor, individual, point, politeness, regarding, respect, respected, respectful, respectfully, respecting, respective, see, several, single, solid, value, valued, values, valuing, various, view
service	7	194	0.08	activity, aid, conjugation, functional, help, practical, service, setting, useful, utility, work
shared	6	309	0.08	apply, common, communicate, dealing, divide, employ, get, mutual, offering, shared, use
sometimes	9	41	0.08	'old, past, sometimes
'stiff'	7	152	0.08	formal, 'stiff', strong
validates	9	114	0.08	change, confirmed, credibility, finding, legitimate, robust, sound, strength, support, supportive, valid, validate, validated, validates, validating, validation, validity
various	7	130	0.08	different, varied, various, versatile
diglossia	9	22	0.08	diglossia, 'diglossia'
goes	4	21	0.08	goes
'a'	3	22	0.07	'a', letter
across	6	18	0.07	across
applied	7	145	0.07	applied, apply, cover, enforcers, give, gives, implementing, lot, practical, relate
appreciate	10	248	0.07	acknowledge, appreciate, appreciated, appreciation, appreciative, comprehend, grasp, grasped, increase, recognize, see, sense, understand, understanding, understood, value, valued, values, valuing, view
classical	9	273	0.07	change, classical, definitely, standard
classroom	9	50	0.07	classroom, classrooms
confused	8	83	0.07	change, confuse, confused, confusion, disconnect, disconnected, error, get, mistake, 'mistake', mistakes, 'mistakes, 'mistakes', piece, pose, similar, stick
consistent	10	77	0.07	adherence, agree, coherence, cohesion, consistent, consistently, consonant, exist, fluidity, retention, systematically
devices	7	214	0.07	action, audio, back, bridge, changer, cover, devices, emphasis, filter, first, hand, high, inversion, key, lead, level, line, link, load, low, master, memory, objective, pattern, pick, register, reinforcement, repetition, resistance, rest, safe, second, spot, stand, stop, support, switch, sword, tendency, third, video, works
emphatic	8	47	0.07	definitely, emphasize, emphasized, emphasizing, emphatic
expectations	12	160	0.07	anticipate, believe, big, big', bigly', carries, carry, carrying, construct, develop, due, expectations, expected, great, greatly, 'greatly', guess, heavy, judge, large, large', largely, largely', 'largely', look, mean, prospective, see, think, view
fair	4	115	0.07	beauty, clear, comes, coming, fair, fairly, feminine, just, show
familiar	8	157	0.07	close, closing, common, conversation, conversely, everyday, experience, familiar, information, informed
general	7	198	0.07	common, currency, general, generally, idea, mostly, mouth, overall, popular, prevalence, rule, speak, systemic, talk, thought, transfer
get	3	362	0.07	access, acquisition, address, benefit, buy, carry, clear, communicate, engage, express, feel, find, get, getting, hear, heritage, honor, letter, make, pinpoint, source, take, understand, welcome
highly	6	66	0.07	advanced, extremely, full, high, higher, highly, level, nasal, place, rich, richness, spot, upper
increase	8	176	0.07	add, age, appreciate, appreciation, boost, broadening, build, change, compound, deepen, develop, differentiate, double, enhance, enrich, evolve, exaggerated, focusing, full, give, include, increase, increases, mark, mix, progress, root
intimidating	12	24	0.07	daunting, discourage, discouraging, fear, intimidate, intimidating
managing	8	122	0.07	achieving, build, careful, carefully, conduct, dealing, direct, 'do, 'do', guide, handle, handled, handling, lead, manage, managed, management, managing, mind, move, process, realized, tend, work
norm	4	266	0.07	mean, mode, norm, norms, standard
omitted	7	29	0.07	dropping, except, exceptions, exclude, forget, omit, omits, omitted, overlooked
participle	10	110	0.07	participle, participles, verb
past	4	86	0.07	attach, cover, gone, historical, history, past, period, preceding, recent, stick, tense
perfect	7	147	0.07	aspect, better, clear, completed, completely, culture, finish, ideal, idealized, improve, perfect, 'perfect', perfectly, purely, tense, utterance, utterances
pragmatics	10	144	0.07	linguistics, practical, pragmatics
primarily	9	23	0.07	main, mainly, primarily
purely	6	86	0.07	clear, fine, honor, native, purely, purity, purity', rub, sheer, status, strict, strictly, theoretical
regulated	9	301	0.07	dominance, limit, official, register, regulated, regulations, rule, standard
reinforce	9	149	0.07	built, improved, input, learn, line, reinforce, reinforced, reinforcement, reinforcing, strong, support, supportive, supports, teach
remember	8	151	0.07	associate, connect, connection, differentiate, identify, identity, know, link, mark, memory, mention, mind, mistake, name, recall, recognition, recognize, relate, remember, 'remember, remembered, remembering, review, think, 'think, 'think', thinking, type
repeated	8	68	0.07	abstract, double, move, pass, piece, recurring, repeat, repeated, repeatedly, repetition, rephrase, translate
reported	8	56	0.07	account, accounts, cover, covered, describe, describing, essay, information, relation, reported, studies, study, talk
response	8	143	0.07	domain, greeting, hands, imperative, issue, job, mode, outcome, phrase, reaction, receptive, respect, response, responses, sensitive, sensitivity, way
root	4	240	0.07	based, become, delve, derivation, development, form, number, origins, point, relation, relative, root, roots, set, solutions, source, stemming, structure
significant	11	98	0.07	implications, importance, important, large, meaning, moment, significance, significant, significantly
skills	6	142	0.07	ability, fluency, good, hot, mean, power, practiced, precise, professionalism, proficiency, proficient, skill, skills, state, versatile
talk	4	241	0.07	address, conversation, discourse, discussion, expose, learn, speech, talk, teach
term	4	200	0.07	life, name, period, point, position, sentence, session, status, subject, term, terms, time, word
'to	3	19	0.07	'to, to', 'to'
tool	4	127	0.07	bit, drill, means, pick, process, provide, tool, tools, way, work
touched	7	309	0.07	adhere, affect, attach, bank, case, change, communicating, communication, comprehend, connect, consume, cover, engage, feel, flow, full, get, handle, handling, manage, meeting, meets, mix, mode, mouth, move, perceive, pick, rub, spot, stick, take, tongue, touched, understand, way, work
transition	10	133	0.07	bring, change, convey, journey, pass, passages, shift, switch, take, transition, verb
verbal	6	89	0.07	communicative, mouth, phrasing, speak, spoken, talk, verbal
meant	5	18	0.07	meant
'the'	5	19	0.07	'the'
'this	5	19	0.07	'this
'you	4	19	0.07	'you, 'you'
align	5	266	0.06	address, agree, align, community, conjunctions, correct, encounter, focus, meeting, placement, set, stand
analyze	7	85	0.06	analyses, analyze, analyzed, analyzing, compare, complex, examining, follow, map, name, review, search, studies, study, view
assessment	10	81	0.06	appreciate, assess, assessing, assessment, guess, judge, judgment, mark, marking, promote, recommend, review, set, value, valued, values, valuing
attention	9	130	0.06	aid, aids, attention, careful, carefully, focus, focusing, mind, notice, regarding, study, tend, tends, thought, work
awareness	9	158	0.06	aware, awareness, careful, conscious, consciously, feel, knowing, mind, mindful, sense
baseline	8	252	0.06	baseline, line, standard
bombards	8	258	0.06	bombards, fire, language
close	5	131	0.06	approach, approaching, belonging, careful, close, closing, coming, completed, completely, end, ending, engage, familiar, final, fine, finish, good, hot, immediate, move, near, next, private, short, stop
confidence	10	92	0.06	certain, confidence, confident, convincing, expose, give, hand, pass, position, positioned, positioning, positive, positively, sure
conversely	10	299	0.06	change, chat, conversation, conversely, exchange, figuring, language, shift, speech, talk, transition
convey	6	230	0.06	accent, acknowledge, aim, appreciate, ask, background, breathe, convey, conveyed, conveying, delivery, emphasize, express, get, give, limited, local, look, mean, phrase, recognize, represent, show, smile, stress, train, transfer, word
dealing	7	227	0.06	agreement, building, business, carry, conduct, construction, conveying, dealing, delivery, exchange, give, hand, handling, lot, move, outcome, pass, relation, transfer, understanding
dedicated	9	222	0.06	affirmation, apply, content, dedicate, dedicated, employ, engagement, give, gives, use, word
demanding	9	260	0.06	activity, ask, challenge, demanding, require, strict, use, want
difficult	9	65	0.06	awkward, challenging, difficult, difficulties, difficulty, hard, subtlety, tough, tricky, trying
elf	3	15	0.06	elf
examples	8	113	0.06	bit, case, example, examples, exercise, exercises, illustrate, illustrating, information, instance, lesson, piece, represent, represents, sample, time
expose	6	135	0.06	affect, expose, exposed, exposes, exposing, exposure, face, impact, model, open, opening, openly, opens, pose, produce, show, subject, talk
follow	6	295	0.06	accompanied, analyze, apply, carry, comes, coming, cover, develop, follow, followed, move, people, practice, pursuits, regular, select, study, substitute, take, understand, use
foreign	7	44	0.06	abroad, alienate, alienating, foreign, 'foreign', 'foreignness', international, outside
ground	6	211	0.06	attachment, connect, connection, connective, ground, information, lead, learn, link, make, perception, place, pose, position, set, teach, tongue, validation
identity	8	51	0.06	identities, identity, individual, recognition, unity, 'very
idioms	6	112	0.06	expression, idiom, idioms, mode, order, phrase, phrases, phrasing, saying, way
improving	9	125	0.06	attachment, better, broadening, built, clarification, correction, developed, development, enrichment, improve, improved, improving, overhaul, progress, reinforced, service
indicative	10	163	0.06	account, baseline, benchmark, case, clue, fingerprint, hand, history, indicative, level, line, mark, mode, mood, present, read, register, represent, show, statement, target
interactions	12	160	0.06	action, address, associate, attach, connect, handle, interact, interacting, interaction, interactions, interacts, interfere, interplay, move, mutual, placement, relate, relation, see, wrong
introduce	9	75	0.06	attach, connect, give, input, introduce, introduced, introducing, place, pose, position, preceding, present, presentation, presentation', presentations, presented, presenting, set, slip, state
letter	6	143	0.06	consonant, culture, honor, initial, learning, letter, line, note, text, vowel, write, writing
line	4	204	0.06	aim, approach, baseline, communicating, communication, connection, connective, cover, divide, face, formation, front, liaison, line, link, mark, note, notes, parallel, pattern, pick, position, prompt, prompting, reinforce, speech, tendency, text, tightrope, way, words
markers	7	22	0.06	mark, marked, markers, marking, spot
memorization	12	108	0.06	acquisition, learner, learning, memorable, memorization, memorize, rote, study
music	5	265	0.06	activity, acts, article, book, classical, close, closing, development, end, ending, idea, intonation, job, lead, line, mark, music, opening, part, phrase, piece, place, preparation, proverbs, section, slide, sound, spot, statement, study, support, text, transition, variation, voice
navigate	8	138	0.06	direct, guidance, guide, journey, navigate, navigating, point, work
order	5	263	0.06	agreement, asking, community, current, direct, exclude, flow, idiom, judge, line, make, opening, order, phrase, place, places, position, prescribers, prioritize, quiet, range, recall, regular, regularly, regulated, regulations, require, rule, 'say', saying, set, society, status, 'tell', train, wish, word, zone
peer	4	78	0.06	associate, contemporary, double, look, participant, peer, peers, replacement, sister, substitute
perceived	9	204	0.06	comprehend, feel, find, get, hear, notice, perceive, perceived, see, sense, spot, understand
please	6	169	0.06	easy, encouraged, good, like, please, wish
politeness	10	86	0.06	action, activity, attention, polite, politely, politeness, respect
primary	7	144	0.06	basic, direct, essential, important, main, mainly, master, mastering, particular, primary
question	8	151	0.06	ask, asking, case, challenge, discourse, doubt, interview, problem, question, questions, reflect, speaker, subject, topic
sense	5	174	0.06	appreciation, awareness, find, grasp, judgment, meaning, notice, perceive, perception, seeing, sense, sensitivity, significance, understand
several	7	156	0.06	critical, different, differentiate, difficulty, divide, part, separate, separation, several, strict
suitable	8	102	0.06	appropriateness, desire, desired, making, suitable
superlatives	12	59	0.06	adjective, adverb, level, point, superlatives
textbook	8	252	0.06	standard, textbook, textbooks
try	3	160	0.06	activity, attempt, attempts, battle, best, chance, consume, difficult, effort, end, essay, essays, examining, fitting, hard, hear, judge, 'judge', move, offer, part, pass, proving, risk, sample, stress, struggle, take, try, 'try, trying
vowel	5	73	0.06	letter, pronounce, sound, vowel, vowels
way	3	262	0.06	access, aim, approach, construction, direct, directions, directly, entry, fashioned, fashioned', form, gateway, idiom, journey, line, mode, opening, order, part, pick, response, shortcut, status, structure, styles, tendency, throat, walk, way, ways
bon'	4	17	0.06	bon, bon'
vous	4	15	0.06	vous, 'vous, 'vous'
academic	8	92	0.05	academia, academic, domain, theoretical, world
adapting	8	124	0.05	ability, adapt, adapting, change, flexible, focus, modified, vary, version, writing
adverb	6	68	0.05	adverb, adverbs, comparative, modifier, positive
aim	3	135	0.05	aim, get, getting, guidance, mean, way
already	7	13	0.05	already
approach	8	109	0.05	access, accessible, address, approach, approachable, approaches, approaching, close, closing, comes, coming, future, move, near
asset	5	206	0.05	account, advantage, aid, asset, assets, bank, good, help, interest, keep, lead, leverage, line, living, means, part, piece, 'plus, preference, resource, right, strength, support, way
attendees	9	61	0.05	attendees, participant
balancing	9	188	0.05	account, balance, balanced, balancing, carry, correct, cover, difference, part, placement, rest
beginners	9	24	0.05	beginners, initial, initially, learner
bridge	6	101	0.05	bridge, bridges, bridging, connection, construction, cover, link, structure, support
building	8	230	0.05	better, build, building, builds, business, construct, construction, constructively, create, deepen, develop, found, ground, improve, increase, make, manage, progress, school, structure
business	8	103	0.05	aim, boring, building, business, construction, drilling, engaged, express, issue, leverage, leveraging, object, objective, output, people, playing, production, target, work
case	4	66	0.05	case, causing, framework, patient, possessive, problem, showcase, showcases, showcasing, slip, statement, type
competence	10	76	0.05	ability, able, competence, develop, double, effective, place, proficiency, show, walk
conduct	7	73	0.05	appropriateness, conduct, dealing, formality, handle, manage, management, politeness, presence, respect, spark
confirmed	9	156	0.05	affirmation, affirmed, agreement, back, confirmed, cover, demonstrate, ensure, explain, information, legitimate, maintain, mark, official, reinforcement, see, show, source, support, supportive, supports, validate
conscious	9	52	0.05	aware, awareness, conscious, consciously, self
constant	8	59	0.05	always, constant, constantly, continuous, number
contextual	10	13	0.05	contextual, contextualization, contextualize, contextually
cover	5	230	0.05	apply, back, bank, bridge, case, change, comfort, concrete, correct, cover, covered, empower, ensure, face, felt, finish, fire, flow, ground, habit, line, overall, pass, see, separate, substitute, take, tongue, tracks, walk
crucial	7	77	0.05	critical, crucial, essential, essentially, importance, important
dependent	9	58	0.05	bank, certain, conditional, dependency, dependent, depending, depends, habitual, habitually, look, looked, reliance, rely, sure
emotional	9	39	0.05	affect, 'affect', affecting, affects, anxiety, comfort, emotion, emotional, fear, little, love, represent, state
encourage	9	127	0.05	aid, boost, encourage, encouraged, encouragement, encourages, encouraging, foster, fostering, get, help, make, support, supportive, supports
endings	7	140	0.05	action, adhere, change, close, closing, coming, completed, completely, decision, end, ended, ending, endings, finish, finished, goal, interrupt, judge, limit, outcome, overly, part, pause, period, place, point, section, separation, spot, stand, stop, stops, suffix, train
entire	6	48	0.05	all', completed, completely, entire, entirely, full, integral, integrate, integrates, integrating, integration, integrity, sole, solely, whole, works
figuring	8	202	0.05	add, allow, assess, comprehend, differentiate, divide, factor, figuring, form, give, grasp, guess, idea, integrate, judge, make, model, nine, one, parallel, perception, place, process, set, single, three, two, unity
find	4	321	0.05	access, add, address, change, collection, comprehend, determiners, feel, find, finding, get, getting, hear, judgment, learn, make, notice, noticed, number, perceive, pinpoint, see, sense, support, take, translate, validation
foster	6	47	0.05	boost, encourage, encouragement, foster, fostering, fosters, promote, support
gently	6	29	0.05	easy, gentle, gently, kind, promote, quiet, softly, still
habitual	8	130	0.05	change, habitual, habitually, regular, regularly, teach
have'	5	269	0.05	carry, consume, deny, experience, finish, get, getting, have', 'have', interact, keep, know, love, maintain, pick, piece, produce, range, sample, save, take, takes, try, use
historical	10	69	0.05	historical, important, past, real
idiomatic	9	13	0.05	idiomatic
imperative	10	66	0.05	imperative, insist, instance, mode, mood
incorrect	9	59	0.05	deviation, error, 'false, incorrect, incorrectly, wrong, 'wrong, 'wrong'
intelligibility	15	94	0.05	ability, born, comprehensibility, information, intelligibility, mind, natural, power, quick, ready, reasoning, think, 'think, 'think', thinking
involves	8	84	0.05	attached, complex, comprehension, connection, engage, engaged, include, interested, involves
judgment	8	138	0.05	affirmation, decision, finding, judgment, mind, mindful, sense, sentence, thought, view
modified	8	95	0.05	add, adjective, adverb, change, comparative, compare, dilute, factor, load, modified, modifier, positive
normalize	9	83	0.05	change, changer, mean, modal, modifier, natural, normal, normalize, normalizes, normally, regular
perhaps	7	13	0.05	maybe, perhaps
phonetics	9	16	0.05	phonetics, phonics
popular	7	133	0.05	common, hot, interpretation, music, popular
possessive	10	78	0.05	controlled, feature, have', 'have', possession, possessive, possessives, relation, retention
prefers	7	126	0.05	advantage, alternative, like, prefer, preference, preferred, prefers, promote, wish
relationship	12	61	0.05	account, assimilation, confidence, liaison, relationship, society
relevant	8	51	0.05	applicability, applicable, connection, point, relevance, relevant
requests	8	201	0.05	application, apply, ask, challenge, collection, communicate, content, desire, direct, keep, offer, order, pass, place, question, recall, requests, require, save, want, wish
review	6	136	0.05	analyze, assessment, 'comment, drill, exercise, judge, notice, practice, recall, refresher, remember, review, reviewing, study, think, variety
section	7	221	0.05	acts, article, book, citation, class, close, closing, corrections, development, divide, end, ending, form, front, job, landscape, lead, local, mark, music, opening, part, place, presence, proverbs, section, segment, separate, separation, spot, text, transition, writing
speech	6	213	0.05	accent, address, delivery, emphasis, intonation, line, note, prompt, prompting, rhythm, speaking, speech, stress, tone, tongue, utterance, word, words
spoken	6	43	0.05	expressed, oral, spoken, verbal
spontaneously	13	33	0.05	intuitive, natural, spontaneous, spontaneously
struggle	8	99	0.05	attempt, battle, effort, encounter, essay, fighting, impact, stand, struggle, struggled, struggles, struggling, try
success	7	104	0.05	achieving, acquisition, action, activity, goal, great, made, mark, natural, opening, order, pass, strength, success
target	6	175	0.05	address, aim, business, direct, directions, directly, end, goal, mark, marked, marking, object, objective, objects, place, places, point, pointing, points, spot, take, target, targeted, thing, train
tendency	8	157	0.05	attitude, desire, devices, leans, preference, prejudice, set, tendency, understanding, way
theoretical	11	83	0.05	abstract, academic, hypothetical, theoretical
time	4	203	0.05	approach, approaching, bit, case, coming, correct, currency, day, example, experience, hour, influence, instance, lead, moment, period, piece, priority, regular, second, set, time, times
type	4	218	0.05	case, face, form, identify, kind, modern, nature, shift, space, type, variation, variety, version, write, writing
variants	8	115	0.05	departure, deviation, difference, different, variants
vast	4	37	0.05	big, 'enormous', great, greatly, 'greatly', huge, 'huge', immense, large, vast, wide, widely
willing	7	55	0.05	aim, give, happy, intention, leave', pick, prepared, present, purpose, ready, willing, willingly
years	5	69	0.05	age, class, 'class', classes, day, life, period, years
among	5	14	0.05	among
biggest	7	14	0.05	biggest
'feu'	5	13	0.05	'feu'
franca	6	14	0.05	franca, franca'
français	8	13	0.05	français, français'
francophone	11	13	0.05	francophone
parle	5	14	0.05	parle, 'parle
qaf	3	13	0.05	qaf, 'qaf, 'qaf'
versus	6	14	0.05	versus
account	7	155	0.04	account, accounts, assess, balance, business, clarification, compound, construction, derivation, entry, explanation, explanations, ground, importance, interpretation, job, letter, line, reading, register, relationship, review, statement, system, version
advantage	9	124	0.04	account, advantage, advantages, asset, beneficial, benefit, good, lead, leverage, point, positive, prefer, preference
all'	4	11	0.04	all', every
appropriate	11	65	0.04	allow, allowing, allows, appropriate, 'appropriate', appropriately, appropriateness, carry, fits, fitting, getting, right, 'right, suitable
'bigger	7	19	0.04	big, bigger, 'bigger, 'bigger', large, larger
carefully	9	100	0.04	aid, aware, careful, carefully, certain, close, detailed, help, look, love, mind, mindful, overhaul, particular, see, service, sure, tend
causing	7	214	0.04	causing, exposure, factor, impact, individual, influence, person, use
colored	7	134	0.04	affect, artificial, change, colored, deep, form, impact, influence, interest, kind, pick, rich, richness, tone, variety, vibrant, work
complex	7	103	0.04	complex, complexities, complexity, compound, construction, intricate, still, structure, tapestry, whole, works
considering	11	126	0.04	abstract, compare, considered, considering, dealing, discuss, factor, reflect, see, studies, study, take, takes, view
designed	8	255	0.04	address, advantage, aim, create, designed, direct, exchange, fashioned, finding, gentle, intending, intention, intentionally, make, mean, name, number, place, post, prefer, promote, reduce, second, study, task, term, think, transfer
desperately	11	52	0.04	critical, desperately, imperative
divergences	11	113	0.04	difference, different, divergences, move, separate, separation
documents	9	212	0.04	account, attachment, book, brief, credential, documents, form, judgment, law, manifest, note, order, pass, process, program, register, source, statement, study, support, transfer, well, writing
dominance	9	56	0.04	controlled, dominance, influence, note, possessive, tone, work
engaging	8	161	0.04	action, battle, business, close, connected, consume, employ, engage, engaged, engagement, engaging, fighting, get, interest, job, meeting, move, offer, practice, provide, switch, take, takes
enrich	6	59	0.04	add, better, enrich, enriches, enriching, enrichment, improve
equip	5	101	0.04	bit, equip, equipped, equipping, equips, fits, fitting, game, goal, piece, prepared, provide, set, stick, still, target
exams	5	61	0.04	communicating, communication, examining, exams, final, oral
excellent	9	38	0.04	excellent, feature, pass, richness
goal	4	86	0.04	aim, business, end, ended, ending, endings, finish, finished, goal, goals, idea, intention, mind, object, objective, point, purpose, target, thing, view
grasp	5	165	0.04	comprehend, embrace, grasp, grasped, influence, range, understand, understanding
guide	5	150	0.04	construction, direct, example, guide, guided, guides, guiding, leading, model, pass, rub, structure
habit	5	49	0.04	alexandrian, american, development, german, habit, habits, inhabit, latin, parisian
hard	4	46	0.04	difficulty, hard, harshly, heavily, heavy, set, several, solid, 'stiff', strong, strongly, tough
implicitly	10	21	0.04	implicitly, silent, understood
interference	12	72	0.04	background, hinder, hindering, hinders, impede, interact, interfere, interference, save, static
later	5	43	0.04	advanced, dominance, later, move, pass, subsequent
literal	7	83	0.04	educated, error, explicit, literal, literary, mistake, see, tendency
love	4	106	0.04	attached, emotion, like, love, object, preferred, wanted
maintaining	11	53	0.04	continue, explain, insist, keep, legitimate, maintain, maintaining
masculine	9	78	0.04	change, development, gender, masculine
native	6	40	0.04	change, delivery, native, 'native
next	4	40	0.04	close, follow, followed, future, next
one	3	51	0.04	identity, one, ones, single, singling, unity
origins	7	112	0.04	ability, creativity, derivation, example, factor, first, line, model, name, new, origins, people, power, primary, source
parallels	9	39	0.04	agree, change, line, parallel, parallels, place, pose, position, set
penalizing	10	136	0.04	correct, correction, music, penalize, penalizing, stick
performance	11	177	0.04	action, activity, acts, benefit, bit, business, conduct, follow, give, heavy, interpretation, intonation, king, lead, move, number, part, performance, playing, plays, presentation, program, read, role, show, voice, young
person	6	139	0.04	build, form, heavy, identity, individual, part, person, personal, playing, private, role
plans	5	176	0.04	aim, book, chart, designed, direct, introduce, map, mean, offer, plans, preparation, program, rhythm, system, think, time
poor	4	89	0.04	mean, need, people, poor, want
precise	7	140	0.04	accurately, clarity, correct, fine, precise, right
proficiency	11	41	0.04	competence, proficiency, proficient, techniques
purposes	8	71	0.04	aim, designed, determiners, end, goal, idea, intention, intentionally, mean, mind, purpose, purposes, think, view
'r'	3	25	0.04	constant, letter, 'r'
real	4	51	0.04	actual, actually, concrete, literal, real, 'real', realities, reality, really, tangible, 'very
recommendations	15	25	0.04	change, recommend, recommendation, recommendations
rephrased	9	29	0.04	paraphrasing, repeat, rephrase, rephrased, rephrasing, translate, translation
represent	9	203	0.04	acts, add, affect, chart, constitutes, describe, express, form, illustrate, interpretation, king, make, map, mean, model, mouth, playing, plays, pose, present, range, represent, represents, rule, show, support
role	4	93	0.04	activity, back, end, first, function, functional, functions, heavy, part, place, position, role, second, short, third
search	6	168	0.04	activity, feel, look, looked, search, search', searched, see, want
seem	4	194	0.04	apparent, feel, look, looked, make, seem, seemed, sound
serves	6	128	0.04	aid, bank, delivery, 'do, 'do', facilitate, function, help, let, move, pass, provide, serve, served, serves, service, stand, work
situations	10	89	0.04	balance, challenge, difficulty, environment, map, place, position, situation, situations, thing
subtly	6	11	0.04	subtly
theory	6	86	0.04	basis, concept, construct, foundation, framework, given, hypothetical, model, relativity, theory
treating	8	176	0.04	analyze, correct, give, present, provide, treating
value	5	87	0.04	account, appreciate, assess, assessment, ideal, importance, moment, relation, richness, set, significance, value, valued, values, valuing
view	4	118	0.04	aim, analyze, aspect, aspects, background, considered, considering, content, decision, exposure, ground, guess, idea, intention, judgment, look, mind, position, prospective, purpose, range, study, thought, view, viewing, views
voice	5	116	0.04	articulated, articulation, express, expression, interpretation, means, mouth, passive, represent, represents, softly, sound, voice, way
waited	6	31	0.04	anticipate, expectations, expected, look, looked, move, pause, ready, table, waited, work
within	6	12	0.04	within
'fuh	4	12	0.04	'fuh, 'fuh'
something	9	10	0.04	something
'these	6	11	0.04	'these, 'these'
translanguaging	15	10	0.04	translanguaging
'tu'	4	12	0.04	'tu, 'tu'
veux'	5	12	0.04	veux'
actual	6	103	0.03	actual, actually, create, current, existence, express, make, real, reality, realized, really, represent
acutely	7	53	0.03	accent, acutely, critical, sensitivity
add	3	171	0.03	add, breathe, bring, change, compound, enrich, factor, form, include, increase, make, mark, mix, number, state
affect	6	114	0.03	affect, 'affect', affecting, affects, artificial, attachment, change, mouth, register, respect, subject, tense, touched, unnatural
agree	5	86	0.03	adhere, agree, agree', 'agree', align, approach, clear, cover, fits, fitting, look, parallel, pattern, recall, serve, support
alienating	10	71	0.03	action, affect, alienate, alienating, change, foreign, isolation, move, transfer
argumentative	13	121	0.03	address, argumentation, argumentative, case, discussion, line, reasoning, statement, statements, word
'artificial'	12	13	0.03	artificial, 'artificial', colored, near, substitute, unnatural
assimilation	12	79	0.03	adapt, assimilation, change, education, learn, open, receptive, relationship
attuned	7	110	0.03	attuned, correct, set
based	5	103	0.03	based, basic, basis, build, compound, found, ground, number, part, piece, stand, support, third, wrong
beyond	6	9	0.03	beyond
certain	7	42	0.03	careful, certain, confident, positive, sure
code	4	154	0.03	access, address, application, code, function, instruction, link, mark, program, statement, utility, writing
cohesion	8	56	0.03	cohesion, cohesive, development
comfortable	11	82	0.03	aid, belonging, comfort, comfortable, easing, easy, gentle, help, keep, living, quiet, rich, richness, still, support, wide
completed	9	129	0.03	completed, completely, full, good, integrity, perfect, realized, sheer, sound, unity, works
compound	8	83	0.03	account, add, attachment, complex, compound, confusion, conjugation, deepen, deepens, enhance, incorporate, increase, integrate, integration, mix, piece, preparation, whole
contain	7	117	0.03	bank, case, contain, controlled, form, pan, safe, showcase, stop, stops, system, take, takes, well
deepen	6	58	0.03	build, deepen, deepens, development, evolution, increase
definitely	10	46	0.03	account, certain, definitely, determiners, distinct, explanation, explicit, expressed
derivations	11	80	0.03	account, comes, coming, compound, derivation, derivations, differentiate, differentiated, evolve, explanation, root, source, word
describe	8	55	0.03	construct, describe, describing, distinguishes, distinguishing, identified, identify, identifying, key, letter, line, mark, name, represent, set, write
differentiate	13	77	0.03	contrast, develop, difference, differentiate, differentiated, distinguishes, distinguishing, evolve, hinder, identify, know, mark, marked, marking, place, separate, separately, separation, several, specialized, specializing, 'tell'
dropping	8	86	0.03	change, consume, correction, dropping, express, fatigue, fire, flattened, formation, job, move, place, take
easy	4	22	0.03	comfortable, conduct, easy, simple, simplified, softly
essay	5	99	0.03	attempt, attempts, effort, essay, essays, try, writing
exercises	9	195	0.03	apply, effort, employ, exercise, exercises, set, tone, train, use
explicit	8	32	0.03	clarity, explicit, explicitly, literal
factors	7	77	0.03	add, bring, factor, factors, modifier, number, part, point, section, study
feminine	8	41	0.03	fair, feminine, gender
fire	4	122	0.03	confuse, consume, cover, create, encourage, ending, engage, fire, interest, intimidate, make, stress, try
given	5	28	0.03	acknowledged, given, mind, mindful, tend, tends
greatly	7	93	0.03	big, good, great, greatly, 'greatly', importance, important, large, success
hands	5	158	0.03	ability, aid, collection, conduct, dealing, direct, give, gives, guide, hand, hands, help, lead, pass, power, right, script, slip, take, transfer, writing
history	7	37	0.03	account, accounts, continuum, history, life, past
however	7	10	0.03	however, still
identifying	11	125	0.03	associate, confuse, connect, contrast, differentiate, identified, identify, identifying, know, link, list, mistake, name, number, place, places, recognize, relate, see, separate, set, type, view
'il	3	9	0.03	'il
impact	6	93	0.03	affect, 'affect', affecting, affects, change, expose, fighting, impact, impacting, impacts, influence, issue, outcome, prejudice, process, subject, touched
implementing	12	114	0.03	adhere, bit, core, drill, finish, helpful, implementing, key, means, pen, pick, practice, stick, tool, voice, way
incorporate	11	61	0.03	compound, contain, include, incorporate, incorporating, integral, integrate, integrates, integrating, integration, integrity
interpretation	14	82	0.03	account, clarification, construction, explain, explanation, interpretation, letter, performance, program, reading, understood, version
invited	7	102	0.03	asking, challenge, fire, interact, invited, letter, question, see, welcome
let	3	124	0.03	allow, allowing, allows, clear, get, getting, give, have', 'have', let, 'let, letting, make, okay, pass, serve, service, stand, support
leveraging	10	27	0.03	advantage, leverage, leveraging
lives	5	64	0.03	current, hot, hot', inhabit, keep, life, live, lived, lives, living, 'living', move, people, resource, support, supportive, supports, vital
marked	6	126	0.03	accent, add, assess, attach, baseline, book, change, clue, code, construct, describe, fingerprint, letter, line, mark, marked, marking, pattern, period, pinpoint, point, post, signs, spot, stop, success, 'tick', value, write
mention	7	76	0.03	acknowledge, honor, input, mean, mention, mentions, name, note, notes, notice, pick, referring, remarks, remember, speaker, state
mini	4	8	0.03	mini
modal	5	33	0.03	modal, mode, normal, seeing, sense
modern	6	66	0.03	advanced, contemporary, currency, modern, new, overhaul, pattern, practice, version
'more	5	15	0.03	convention, 'more, 'more', normal, pattern, rule
motivation	10	77	0.03	driven, dynamic, idea, make, motivate, motivating, motivation, move, pattern, prompt, prompting
open	4	84	0.03	alternative, chance, entry, expose, first, found, gap, gaps, give, gives, initial, initially, issue, mouth, move, open, opening, openly, opens, outside, point, section, shift, space, starting, throat, wide
opportunities	13	80	0.03	audience, chance, day, good, opening, opportunities, right
pass	4	163	0.03	allow, bridge, change, clear, cover, end, extremely, gap, let, make, move, overhaul, pass, passages, progress, reaction, response, serve, success, take, transcends, walk, work
passages	8	132	0.03	citation, delivery, mouth, opening, passages, phrase, piece, place, section, slide, structure, text, throat, transition, way, well
placement	9	106	0.03	activity, balance, formation, hour, piece, placement, position, positioned, positioning, positive, positively, separation, set, way
preceding	9	63	0.03	activity, example, instance, law, preceding, preparatory, subject, topic
prestige	8	8	0.03	prestige, 'prestigious'
promotes	8	39	0.03	change, content, encouraging, endorsement, progress, promote, promotes, promoting
reducing	8	59	0.03	abbreviations, change, contractions, dilute, diluting, divide, exchange, limit, low, part, reaction, reduce, reduces, reducing, reduction, separate, shorten, small, substitute
repertoire	10	14	0.03	collection, repertoire, repertoires
'so	3	8	0.03	hence, 'so, 'then, therefore, thus
space	5	139	0.03	gap, hour, key, lead, mouth, opening, piece, place, placement, places, pose, position, separation, set, shift, space, type, variation, way
sparingly	9	162	0.03	give, sparingly, use
starting	8	137	0.03	advantage, create, entry, first, formation, foundation, get, getting, initial, initially, introduce, line, make, move, opening, origins, point, set, springboard, starting, starts
subsequent	10	28	0.03	later, outcome, subsequent
task	4	60	0.03	business, chance, effort, experiment, homework, lesson, preparation, risk, task, tasks, work
'tell'	6	118	0.03	abstract, breathe, carry, convey, effective, expose, express, give, guess, issue, look, mark, mean, notice, point, relate, repeat, rephrase, show, talk, 'tell', translate
translation	11	67	0.03	change, find, interpretation, move, program, repeat, rephrase, shift, transfer, translate, translated, translating, translation, translations, version
tricky	6	32	0.03	complexity, difficult, hard, tricky
usually	7	19	0.03	habitual, regular, usually
'why	4	9	0.03	ground, 'why, 'why'
written	7	11	0.03	codified, script, written
'wrong	6	20	0.03	handle, inappropriate, inappropriately, wrong, 'wrong, 'wrong'
broader	7	7	0.03	broader
hādhā	5	8	0.03	hādhā, 'hādhā'
socio	5	9	0.03	socio
suis	4	8	0.03	suis
svo	3	8	0.03	svo
uktub	5	8	0.03	uktub, 'uktub
viens	5	8	0.03	viens
went	4	8	0.03	went
wider	5	7	0.03	wider
yashtari	8	9	0.03	yashtari, 'yashtari, 'yashtari'
'ق'	3	9	0.03	'ق'
'لا'	4	7	0.03	'لا'
agreement	9	75	0.02	agreement, agreements, community, endorsement, pass, preparation, second, takeaway
'air'	5	109	0.02	'air', carry, expose, idea, inversion, issue, line, music, note, part, pass, slide, statement, support, variation, voice
antonyms	8	41	0.02	antonyms, contrastive, word
anxiety	7	20	0.02	anxiety, anxious, emotion, fear
arrived	7	28	0.02	action, arrive, arrived, comes, coming, entry, get, getting
attached	8	68	0.02	adhere, attach, attached, attachment, code, connect, connection, connective, ground, input, introduce, link, mark, point, post, prefix, relate, stick, suffix, take
away	4	18	0.02	absence, absent, away
awkward	7	32	0.02	awkward, difficult, disadvantage, hard, 'stiff'
back	4	45	0.02	back, backbone, cover, covered, endorsement, game, games, hinder, hindering, hinders, move, place, position, reinforcement, resource, second, shift, support, supportive, supports, switch
'bad'	5	24	0.02	'bad', disadvantage, hard, negative, poor, several, tough, worse
become	6	140	0.02	become, comes, coming, develop, follow, form, make, root, seem, seemed
benefit	7	137	0.02	advantage, aid, benefit, clear, get, good, help, interest, performance
broadens	8	50	0.02	broadening, broadens, change, development, increase, vary
buy	3	34	0.02	believe, buy, buy', get, take
calmly	6	16	0.02	affect, calmly, comfort, gentle, quiet, still
cognates	8	68	0.02	cognates, related, relation, relationship, relative, word
collocations	12	41	0.02	collocations, group, placement, position, positioning
comes	5	136	0.02	address, approach, arrive, become, change, close, comes, coming, experience, get, lead, move, near, pass, present, recognize, see, welcome, wish
'comment	8	50	0.02	account, citation, 'comment, explain, input, mention, note, remarks, statement, talk
concrete	8	69	0.02	action, activity, change, concrete, conjugation, cover, objective, real, solid, tangible
constitutes	11	77	0.02	constitutes, essential, framework, ingrained, law, legitimate, official, organizations, recognized, structure, walk
construction	12	106	0.02	construct, construction, constructively, describe, formative, interpretation, line, make, positive, thinking, thought
contemporary	12	38	0.02	contemporary, current, generated, generations, modern, peer, people
contractions	12	115	0.02	bridge, change, contractions, employ, engage, getting, initial, provide, reduce, reduction, signs, word
countries	9	18	0.02	countries, egypt, france, state, states
courses	7	70	0.02	action, courses, cover, current, filter, flow, flowing, line, move, tracks, way
current	7	25	0.02	actual, contemporary, currency, current, flow, flowing, line, live, online
default	7	11	0.02	absence, alternative, default, defaulting
demystifies	11	7	0.02	demystifies, demystify, demystifying
desire	6	98	0.02	desire, desired, good, love, preferred, tendency, want, wanted, wish
determiners	11	99	0.02	article, backbone, clear, decision, dedicate, determiners, driven, follow, guide, influence, judgment, limit, mind, move, name, pick, purpose, recognition, rule, select, set, statement, support, take
dialogues	9	63	0.02	book, dialogues, discussion, recognition, script, talk, word
difficulty	10	47	0.02	barrier, difficulties, difficulty, effort, hurdle, job, obstacle, problem, rub, situation, stress
'do	3	116	0.02	activity, acts, carry, comes, coming, conduct, direct, 'do, 'do', lead, make, move, performance, practice, slight
'does	5	5	0.02	'does
effort	6	63	0.02	application, causing, difficulty, double, effort, exercise, hard, heavy, set, single, struggle
elision	7	7	0.02	elision, elisions, except, exceptions
embrace	7	50	0.02	comprehend, cover, covered, embrace, embraces, grasp, include
empowered	9	9	0.02	cover, empower, empowered, empowering
encounter	9	46	0.02	chance, connection, encounter, face, fighting, find, finding, front, happened, happens, meeting, meets, playing, plays
endorsement	11	61	0.02	agreement, endorsement, okay, second, support
enhance	7	51	0.02	attention, better, compound, deepen, enhance, improve
environment	11	23	0.02	bank, case, environment, environments, scenario, setting, situation
equivalent	10	38	0.02	equivalent, equivalents, knowledge, position, replacement, status, substitute
extremely	9	86	0.02	end, extremely, face, finish, goal, hand, level, limit, outside, part, range, right, stick, view
face	4	72	0.02	application, case, cover, encounter, expose, face, faced, front, line, look, looked, modern, type
facilitators	12	83	0.02	aid, easing, facilitate, facilitates, facilitators, help, helpful, make
fallacy	7	18	0.02	fallacy, fallacy', incorrect, wrong
'false	6	21	0.02	artificial, 'false, incorrect, 'sour', unrealistic, wrong
fascinating	11	13	0.02	fascinating, interest, interesting, work
fashioned	9	91	0.02	designed, fashioned, fashioned', make, modern, pattern, popular, practice
fast	4	27	0.02	express, fast, 'fast, fastly', hot, immediate, keep, prompt, quick
fear	4	46	0.02	anxiety, careful, carefully, emotion, fear, fearing, respect, value
fighting	8	44	0.02	battle, encounter, fighting, impact, opposed, stand, struggle
films	5	108	0.02	create, feature, films, make, negative, object, positive, show, take
first	5	40	0.02	basic, best, first, initial, initially, low, opening, position
fluency	7	23	0.02	articulated, articulation, fluency
forget	6	15	0.02	forget, forget', forgetting, leave', omit, short, shortly, slip
foundation	10	44	0.02	based, basis, education, found, foundation, ground, initial, initially, institutions, origins, support
frameworks	10	68	0.02	case, framework, frameworks, framing, setting, structure
future	6	96	0.02	approaching, coming, future, good, perspective, position, prospective, tense, view
'g'	3	18	0.02	constant, 'g', letter, 'm'
generated	9	88	0.02	create, develop, generated, generations, get, getting, give, gives, make, period, produce, production, source
greeting	8	93	0.02	acknowledgement, address, communicate, greeting, greetings, hello, present, recognize, recognized, response, welcome, wish
group	5	69	0.02	activity, class, collection, group, 'group', phrasing, separate, separation, set, world
'h'	3	7	0.02	'h', letter
handled	7	45	0.02	dealing, handle, handled, handling, interact, manage, management, mix, stop, treating, work, wrong
heavy	5	77	0.02	big, difficulty, full, heavy, important, lower, lowers, part, role, 'thick'
hesitant	8	12	0.02	hesitant, pause, reluctant
highlighting	12	8	0.02	highlight, highlighting, highlights, particular
hinder	6	35	0.02	barrier, difficulty, hinder, hindering, hinders, hurdle, impede, impedes, interfere, keep, obstacle, rub
hot	3	73	0.02	close, fast, good, hot, hot', near, new, popular, wanted
idea	4	98	0.02	aim, figuring, guess, idea, ideas, intention, inversion, line, mind, mindful, purpose, statement, thought, variation, view
ignoring	8	10	0.02	ignore, ignoring, slight, 'unlearn'
immediate	9	66	0.02	close, direct, fast, immediate, immediately, instance, present, prompt, prompting, quick
implications	12	16	0.02	affect, implications, lead
'in	3	6	0.02	'in, 'in'
insist	6	27	0.02	imperative, insist, maintain
inspiring	9	79	0.02	breathe, encourage, foster, get, idea, inspiring, make, production, prompt, prompting, source, support, thought
integrate	9	34	0.02	constitutes, embedded, inherently, integral, integrate, integrates, integrating, integration, integrity, interconnected, mix, unity, whole, works
intention	9	52	0.02	end, goal, intention, intentionally, meaning, significance, willing
interrupt	9	30	0.02	breathe, end, fits, fitting, gap, gaps, interjection, interrupt, pause, rest, stop
intuitively	11	16	0.02	comprehend, feeling, grasp, intuitive, intuitively, spontaneous
issue	5	50	0.02	communicate, content, issue, issues, opening, relation, relative, take, takes, write
keep	4	87	0.02	contain, cover, deny, exclude, hands, hinder, impede, interfere, keep, maintain, make, manifest, mark, possession, post, prepare, ready, retention, save, take, train
key	3	75	0.02	explanation, important, key, list, master, provide, shift, space
kind	4	132	0.02	action, address, gentle, good, kind
law	3	48	0.02	basics, collection, concept, construct, law, legitimacy, regular, rule, validity
liaison	7	25	0.02	involves, liaison, 'liaison', line, link, linking
linking	7	53	0.02	attach, bridge, connected, instruction, link, linking, statement
listening	9	74	0.02	comprehend, focus, hear, listening, mind, mindful, perceive, perception
load	4	52	0.02	dilute, diluting, full, handling, imposition, live, load, place, pose, position, rich, set, 'stiff', transfer
lot	3	66	0.02	allow, apply, appropriate, collection, dealing, divide, give, load, lot, object, present, separate, strength, success
memory	6	144	0.02	address, construction, content, memory, recognition, retention, speak, structure
mind	4	69	0.02	handle, intellectual, knowledge, manage, mind, mindful, notice, object, recall, remember, subconscious, tend
moment	6	48	0.02	importance, important, moment, present, significant
mostly	6	8	0.02	almost, 'almost, mostly, near
'ne'	4	14	0.02	'ne, 'ne', point
online	6	23	0.02	connected, current, online
opposed	7	68	0.02	challenge, contrast, face, move, opposed
overlooked	10	13	0.02	dominance, high, overlooked, overshadow, place, spot
pairs	5	39	0.02	cover, know, love, paired, pairs, serve, service, set, stand, take, two
paragraph	9	57	0.02	divide, paragraph, pen, separate, write, writing
pas'	4	7	0.02	pas, pas', 'pas'
pause	5	19	0.02	breathe, hesitant, interrupt, pause, paused, rest
persistent	10	30	0.02	continue, continued, continuous, follow, persistent, prevailing, purpose, remains, stick, strength
phrase	6	81	0.02	construction, expression, nominal, order, phrase, phrases, phrasing, response
place	5	85	0.02	end, high, job, knowledge, move, order, place, places, point, position, post, situation, space, spot, status, stop, target, zone
pose	4	57	0.02	affect, 'affect', affecting, affects, 'air', attitude, carry, conduct, confuse, get, getting, move, person, personal, pose, position, stick, sticking
potentially	11	24	0.02	chance, enhance, grasp, potential, potentially, range
power	5	74	0.02	dominance, effectiveness, grasp, influence, interest, load, power, powerful, provide, state, strength, strong
praised	7	28	0.02	assess, praised, promote, recommend, recommendation, value
prevalent	9	46	0.02	currency, dominance, frequent, number, prevailing, prevalence, prevalent
principles	10	31	0.02	basics, explanation, law, principles, relation, rule, value
produce	7	104	0.02	apple, carry, create, expose, make, offer, post, produce
progress	8	50	0.02	advanced, increase, increases, modern, progress, tense
rapport	7	6	0.02	rapport
reaction	8	51	0.02	fire, idea, reaction, reducing, reduction, resistance, response, thought
realized	8	93	0.02	piece, realized, recognition, tangible, understanding
recall	6	82	0.02	asking, focus, memory, mind, recall, remembering, take
recognized	10	77	0.02	confuse, honor, identify, know, mistake, realized, recall, recognize, recognized, remember, think, type
regarding	9	28	0.02	affect, 'affect', affecting, affects, considered, considering, greeting, involves, look, regarding, relate, respectful, wish
remarks	7	29	0.02	important, notice, remarks, significant
requires	8	36	0.02	demanding, exclude, order, require, required, requirements, requires, requiring
rich	4	46	0.02	comfort, comfortable, deep, easy, full, people, production, rich, richness, robust, tone, valuable, value
rigid	5	11	0.02	rigid, 'rigid', rigidly, 'stiff', strict, strictly
risks	5	51	0.02	attempt, chance, double, essay, risk, risks, try
save	4	132	0.02	action, good, keep, maintain, manifest, mark, post, register, save, sparingly, take, write
semantic	8	51	0.02	linguistics, meaning, semantic
separately	10	49	0.02	article, change, detached, disadvantage, distinct, divide, filter, isolation, lot, outcome, pan, paragraph, prejudice, separate, separately, separation, several, space, zone
shifts	6	76	0.02	back, change, exchange, fitting, key, move, shift, shifting, shifts, slip, substitute, switch, switched, switching, transfer, transition, translation, type
short	5	92	0.02	brief, close, concise, create, lack, little, make, poor, position, short, shortly, want
showcase	8	35	0.02	background, setting, showcase, showcases, showcasing
simple	6	12	0.02	easing, easy, simple
single	6	36	0.02	individual, respective, separate, separately, separation, several, single, singling, singular, sole, various
sizes	5	62	0.02	class, filler, large, number, regular, separate, situation, sizes, small
slight	6	13	0.02	ignore, little, slight, slightly, small
slip	4	75	0.02	error, forget, give, hand, introduce, lead, leading, mistake, move, pass, slide, slip
small	5	28	0.02	fine, limited, little, low, minor, slight, small, young
solid	5	121	0.02	concrete, good, hard, line, point, retention, solid, sound, state, tongue
songs	5	54	0.02	buy, piece, songs, sound
specialized	11	54	0.02	asset, change, differentiated, offer, offering, specialized, specializing, strength, vary, work
spot	4	62	0.02	change, error, find, fingerprint, mark, marking, mistake, nine, pinpoint, section, spot
static	6	36	0.02	interference, static, still
strong	6	70	0.02	hard, irregular, power, powerful, reinforced, robust, solid, sound, 'stiff', strong, strongly
switch	6	69	0.02	change, engage, exchange, replacement, substitute, substitutions, switch, switched, switching, variation
'there	6	5	0.02	presence, 'there, 'there'
tone	4	131	0.02	delivery, exercise, note, notes, register, richness, sound, speech, tone
topic	5	53	0.02	accent, current, emphasis, emphasize, interest, local, stress, topic, topics
tough	5	40	0.02	'bad', difficult, difficulty, hard, strength, tough
triggers	8	14	0.02	causing, initial, initially, triggers
understood	10	17	0.02	appreciated, silent, understood
well	4	35	0.02	advantage, advantages, comfort, comfortable, easily, source, well
younger	7	6	0.02	younger
abḥath	6	5	0.02	abḥath, 'abḥath
children	8	5	0.02	children, 'children, 'children'
'connaître'	11	5	0.02	'connaître'
destigmatize	12	6	0.02	destigmatize
'did'	5	6	0.02	'did, 'did'
don't'	6	5	0.02	don't'
enchaînement	12	6	0.02	enchaînement, 'enchaînement'
forgot	6	5	0.02	forgot, 'forgot, forgot'
'heure'	7	6	0.02	'heure'
'limaadha	9	5	0.02	'limaadha
metalinguistic	14	6	0.02	metalinguistic
'savoir'	8	5	0.02	'savoir'
seen	4	6	0.02	seen
'she	4	5	0.02	'she
'that	5	6	0.02	'that
unidiomatic	11	5	0.02	unidiomatic
'هذا'	5	6	0.02	'هذا'
abbreviations	13	51	0.01	abbreviations, brief, form, reduce, short, shorten
accompanied	11	64	0.01	accompanied, associate, background, move, resulting, rule, see, subsequent, walk
accurately	10	16	0.01	accurately, close, right
achieving	9	48	0.01	achieving, action, coming, effort, going, manage, mark, pass, performance, success, walk
adherence	9	19	0.01	adhere, adherence, agree, attach, attached, attachment, stick, sticking, support
age	3	21	0.01	age, change, develop, elder, must
akin	4	8	0.01	akin, cognates, related, similar
allows	6	42	0.01	allow, allowing, allows, give, let, part
along	5	4	0.01	along, 'on'
alongside	9	2	0.01	alongside
anticipate	10	47	0.01	anticipate, expected, guess, know, look, move, pass, read, reasoning
'ara'	5	3	0.01	ara, 'ara'
'are'	5	2	0.01	'are'
aspect	6	26	0.01	aspect, aspects, feature, hand
audience	8	10	0.01	audience, audiences, chance, hear, interview, people
bank	4	27	0.01	bank, believe, cover, give, look, rely, relying
barrier	7	8	0.01	barrier, barriers, hurdle, obstacle
beauty	6	44	0.01	beauty, example, fair, model
beneficial	10	16	0.01	beneficial, process
big'	4	20	0.01	adults, 'bad', big, big', bigly', give, gives, heavy, important
bit	3	69	0.01	bit, case, example, instance, minutes, moment, part, piece, second, spot, time
breathing	9	23	0.01	breathe, breathing, convey, exist, express, live, pause, rest
brief	5	25	0.01	abstract, brief, concise, short
bring	5	85	0.01	bring, change, convey, conveyed, conveying, get, getting, make, process, serve, transfer
centric	7	2	0.01	centric
chance	6	8	0.01	chance, potential, prospective, risk
chart	5	9	0.01	chart, charts, map, represent
'child'	7	12	0.01	'child', 'childs', issue, young
classifying	11	41	0.01	classifying, sensitive, word
compromising	12	15	0.01	agree, compromising, expose
'cool	5	12	0.01	change, 'cool, 'cool', 'coolness'
counterparts	12	18	0.01	counterparts, equivalent
curated	7	12	0.01	application, curated
currency	8	26	0.01	change, currency, note, prevalence, real
day	3	24	0.01	chance, day, even, period, time
deep	4	58	0.01	big, deep, depth, heavy, large, low, sound, 'thick', wide
deeply	6	3	0.01	deep, deeply
depth	5	33	0.01	deep, depth, level, part, sounding
detached	8	26	0.01	detached, disconnect, divide, isolation, part, separate, separation
detailed	8	28	0.01	careful, detailed, discourse, discussion, information
deviation	9	34	0.01	deviation, deviations, error, unnatural
'devoir'	8	18	0.01	'devoir', politeness
diagnostic	10	2	0.01	diagnostic
disadvantage	12	16	0.01	'bad', disadvantage, negative, prejudice, separate
discarded	9	2	0.01	discarded
disconnect	10	25	0.01	disconnect, disconnected, divide, part, separate, separation
distinguishes	13	16	0.01	distinguishes, distinguishing, important, imposing, mark, recognize, recognized, spot
divide	6	66	0.01	construction, disconnected, divide, line, structure
doors	5	74	0.01	access, construction, doors, entry, structure
double	6	20	0.01	big, double, dual, function, large, substitute, work
due	3	29	0.01	due, expected, referring, right
dynamic	7	25	0.01	activity, change, dynamic, strength
ed'	3	31	0.01	ed', system
either	6	2	0.01	either
empathetic	10	2	0.01	empathetic
empathy	7	4	0.01	empathy
employ	6	18	0.01	employ, engaged, master
enabling	8	15	0.01	change, enabling, equip
enforcers	9	33	0.01	enforcers, help, implementing, imposing, imposition
entry	5	26	0.01	access, approach, content, entry, gateway, opening
'er'	4	2	0.01	'er'
etc	3	2	0.01	etc
even	4	40	0.01	change, day, even, level, period, regular, regularly, still
exaggerated	11	45	0.01	exaggerated, increase, make, tout
examining	9	27	0.01	comparing, comparison, contrast, examining, question, review, search, study
except	6	31	0.01	example, except, exceptions, instance, object
experience	10	35	0.01	change, experience, experiences, experiment, get, getting, have', 'have', practiced, take, time
explanations	12	27	0.01	explanation, explanations, interpretation, key, thinking, thought
exposure	8	46	0.01	aspect, expose, exposure, influence, presentation, still, view
families	8	28	0.01	families, line, name, people, relation, relative
fatigue	7	4	0.01	fatigue, tired, tiredness
feedback	8	38	0.01	action, activity, feedback, reply, response
filled	6	70	0.01	change, close, consume, employ, engage, filled, flow, full, line, load, meeting, meets, people, pick, provide, replacement, sister, take
final	5	17	0.01	close, closing, decision, end, ending, final, finish, ultimately
fine	4	27	0.01	book, close, fine, precise, small
finish	6	39	0.01	action, adhere, close, closing, completed, completely, end, ended, ending, final, finish, finished
flattened	9	42	0.01	flattened, form
flavors	7	66	0.01	flavors, form, kind, variety
flexible	8	3	0.01	compromising, flexible
flow	4	43	0.01	action, activity, current, exist, flow, flowing, move, period, replacement
front	5	46	0.01	advanced, domain, face, far, front, let, line, place, position, presence
full	4	27	0.01	change, filled, full, heavy, high, increase, rich, sounding, wide, widely
game	4	38	0.01	activity, bridge, business, game, games, job, line, stops
gap	3	32	0.01	difference, gap, gaps, open, opening, pass
gentil'	7	3	0.01	gentil'
guess	5	80	0.01	anticipate, assess, give, guess, idea, judge, 'judge', make, place, read, set, view, work
guidelines	10	9	0.01	guidelines, line, program, rule
guys	4	8	0.01	expose, guys, 'guys'
honor	5	44	0.01	associate, citation, first, honor, letter, mention, name, 'prestigious', recognize, respect, right, take
'hotel	6	21	0.01	building, 'hotel
hour	4	17	0.01	hour, minutes, period, shift, time
ideologies	10	25	0.01	abstract, ideologies, reaction
implied	7	44	0.01	carry, express, feature, implied, implies, involves, show
inadvertently	13	2	0.01	inadvertently
inclusive	9	11	0.01	inclusive, increase, situation
incredibly	10	4	0.01	fantastic, incredibly
individual	10	70	0.01	change, differentiate, form, independent, individual, person, personal, private, privately, separate
ing	3	2	0.01	ing, ing'
input	5	26	0.01	business, information, input, introduce, load, reinforcement
instruction	11	64	0.01	brief, code, direct, instruction, link, order, statement, statements
intending	9	8	0.01	attached, conscious, intending, knowing
intonation	10	40	0.01	intonation, judge, mouth, music, pronounce, speak, talk, tone
invaluable	10	16	0.01	invaluable, valuable, value
irregular	9	17	0.01	deviation, irregular, 'irregular', second, strong, unnatural
'j'	3	4	0.01	'j', letter
journey	7	38	0.01	journey, move, navigate, way
king	4	12	0.01	distinction, king, note, power, powerful
lack	4	30	0.01	exclude, lack, lacked, want
leans	5	28	0.01	bank, leans, list, move, place, poor, pose, position, rely, set, slight, sparingly, tendency
leave'	6	47	0.01	expose, get, lam, leave', let, move, part, pass
led	3	2	0.01	led
legitimate	10	22	0.01	change, law, legitimate, legitimize, valid
local	5	24	0.01	finding, front, landscape, local, place, places, presence, section
long	4	29	0.01	desire, far, long, want
look	4	51	0.01	agree, convey, look, looked, peer, perception, search, view
main	4	7	0.01	independent, main, mainly
map	3	27	0.01	chart, map, process, represent, represents, show
meeting	7	45	0.01	convention, engagement, experience, interact, manage, meeting, meets, see, session
mid	3	3	0.01	mid
minimal	7	17	0.01	minimal, nominal, note, reduction, tone
minutes	7	28	0.01	careful, little, minutes, moment, note, pinpoint, point, second, small, time
mistakes	8	20	0.01	confuse, identify, interpretation, mistake, 'mistake', mistakes, 'mistakes, 'mistakes', slip
mohammed	8	2	0.01	mohammed, mohammed'
mouth	5	30	0.01	affect, bit, formation, gap, mouth, opening, voice
much	4	11	0.01	lot, much
name	4	30	0.01	analyze, decision, designed, endorsement, figuring, limit, list, name, recognition, set, study, term
nasal	5	20	0.01	articulation, consonant, high, nasal, pronounce, tone
neutral	7	18	0.01	change, neutral, 'neutral', objective, reaction
new	3	17	0.01	age, hot, new, recent, young
occasionally	12	8	0.01	irregular, occasionally, period
'oh	3	3	0.01	'oh
okay	4	46	0.01	clear, cover, endorsement, fine, okay, okay', pass
'on'	4	10	0.01	connected, 'on'
outside	7	38	0.01	away, open, outside, part, right
overly	6	5	0.01	overly, 'too
overwhelming	12	15	0.01	cover, fire, overwhelming
'pa'	4	2	0.01	'pa'
parents	7	14	0.01	foster, parents
particle	8	5	0.01	particle, particles
prioritize	10	22	0.01	order, place, prioritize, prioritized, prioritizing, range
privately	9	8	0.01	close, isolation, personal, private, privately
problem	7	33	0.01	case, difficulty, problem, question
prominent	9	9	0.01	importance, prominent
prospective	11	21	0.01	future, likely, look, potential, prospective, search
proverbs	8	43	0.01	book, expression, proverbs, saying
proving	7	27	0.01	demonstrate, follow, proving, show
quick	5	9	0.01	fast, 'fast, fastly', prompt, prompting, quick, ready
quiet	5	25	0.01	order, quiet, rest, silent, softly, still
quite	5	6	0.01	quite, stop, stops
range	5	67	0.01	carry, contrast, formation, give, limit, move, range, represent, set, variety, view
ready	5	29	0.01	preparation, prepared, preparedness, prompt, ready, set, willing, willingness
really	6	4	0.01	really, truly
recent	6	26	0.01	new, past, recent
receptive	9	23	0.01	getting, open, opening, openly, opens, receptive, willingness
recurring	9	16	0.01	recall, recurring
redundant	9	4	0.01	redundant, repetition, sparingly
reflect	7	61	0.01	compare, demonstrate, factor, input, intellectual, manifest, point, question, reflect, reflective, reflects, show, study, think, thought
reflexive	9	17	0.01	reaction, reflexive, response
refresher	9	31	0.01	change, class, new, refresher
replacement	11	50	0.01	change, cover, exchange, follow, peer, place, pose, position, replacement, set, similar, substitute
resistance	10	33	0.01	action, demonstrate, impede, impedes, opposed, reaction, resistance, stand
rest	4	21	0.01	nod, pause, place, pose, position, rest, set, stand, support
resulting	9	40	0.01	follow, level, pass, point, resulting, solutions, statement
rhetorical	10	8	0.01	large, rhetorical, stylistic
rub	3	28	0.01	effort, guide, obstacle, pass, resistance, rub
rubrics	7	24	0.01	account, explanation, instruction, recognize, rubrics, rule
sample	6	32	0.01	core, example, instance, pick, sample
scenario	8	20	0.01	book, scenario, scenarios, script, setting
select	6	48	0.01	action, activity, citation, select, selecting, selections, variety
sensitive	9	28	0.01	ability, change, seeing, sense, sensitive, sensitively, sensitivity, work
sessions	8	9	0.01	meeting, session, sessions, term
similar	7	22	0.01	akin, approach, compare, comparison, parallel, similar, similarities
singular	8	57	0.01	form, individual, remarks, single, singular
slang	5	26	0.01	slang, speak, talk, vernacular
smiled	6	18	0.01	express, show, smile, smiled
softly	6	13	0.01	easy, gentle, little, low, quiet, small, softly
solely	6	13	0.01	single, sole, solely
source	6	35	0.01	action, activity, source, well
stamped	7	60	0.01	class, form, separate, solid, stamped, walk, work
stand	5	41	0.01	align, judge, landscape, list, move, place, pose, position, regular, rest, serve, service, set, stand, status, still, stop, support, table
still	5	32	0.01	change, comfort, easing, exposure, quiet, still, works
stop	4	30	0.01	breathe, close, end, ending, finish, impede, interrupt, pause, place, playing, rest, spot, stand, stop, stops
strictly	8	6	0.01	demanding, strict, strictly
studies	7	32	0.01	learn, major, memorize, piece, studies, study, think
suffix	6	11	0.01	ending, suffix, suffixes
summarizing	11	33	0.01	abstract, account, repeat, summarizing
synonyms	8	40	0.01	similar, synonyms, word
systematically	14	25	0.01	pattern, practice, systematically
tailored	8	5	0.01	adapt, tailored
teenagers	9	6	0.01	teenagers, young
tend	4	30	0.01	leans, look, mind, see, tend, tends
'th'	4	4	0.01	'th'
'then	5	26	0.01	past, point, 'then
though	6	3	0.01	though
'tick'	6	43	0.01	mark, sound, 'tick'
'tink'	6	42	0.01	sound, 'tink'
together	8	2	0.01	together
tracks	6	95	0.01	create, follow, introduce, make, switch, tracks
traditional	11	34	0.01	adherence, attachment, content, habit, practice, traditional
'u'	3	5	0.01	letter, 'u'
ultimately	10	25	0.01	final, level, point, ultimately
unattainable	12	2	0.01	unattainable
undeniably	10	16	0.01	positive, undeniably
undermine	9	3	0.01	undermine, undermining
unnatural	9	27	0.01	foreign, irregular, pose, unnatural
unrealistic	11	3	0.01	fantastic, unrealistic
valuable	8	15	0.01	invaluable, rich, valuable
'very	5	14	0.01	precise, 'very
videos	6	3	0.01	video, videos
visual	6	44	0.01	change, see, view, visual
vital	5	30	0.01	change, essential, live, spark, vital
volume	6	25	0.01	big, content, equipped, large, volume
walls	5	28	0.01	difficulty, formation, walls
welcome	7	9	0.01	greeting, recognize, take, welcome, welcoming
widely	6	26	0.01	big, comfortable, deep, large, open, wide, widely
wish	4	55	0.01	asking, desire, desired, express, order, preference, recognize, want, wish
young	5	18	0.01	age, little, new, small, young
'z'	3	10	0.01	ending, finish, letter, 'z'
zone	4	85	0.01	divide, order, part, place, separate, spot, structure, zone
aktub	5	2	0.01	aktub
allé'	5	4	0.01	allé'
aller'	6	2	0.01	aller'
'and	4	2	0.01	'and
'appropriacy'	13	3	0.01	'appropriacy'
arabizi	7	4	0.01	arabizi, 'arabizi'
ashtari	7	2	0.01	ashtari
ashuf	5	2	0.01	ashuf, 'ashuf'
aspiré'	7	2	0.01	aspiré'
ayyuha	6	2	0.01	ayyuha, 'ayyuha
beaucoup	8	3	0.01	beaucoup, 'beaucoup, 'beaucoup'
chaud'	6	4	0.01	chaud, chaud'
curricula	9	2	0.01	curricula
d'accord'	9	4	0.01	d'accord'
d'aller'	8	4	0.01	d'aller'
d'arriver'	10	4	0.01	d'arriver'
demotivate	10	3	0.01	demotivate, demotivating
dhalika	7	2	0.01	dhalika
diglossic	9	2	0.01	diglossic
esl	3	2	0.01	esl
êtes	4	2	0.01	êtes
fait	4	3	0.01	fait
fatigué	7	2	0.01	fatigué, fatigué'
'for'	5	4	0.01	'for'
'fow'	5	3	0.01	'fow'
francophonie	12	2	0.01	francophonie
got	3	2	0.01	got
hādhihi	7	4	0.01	hādhihi, 'hādhihi'
haqqan	6	2	0.01	haqqan
has'	4	4	0.01	has'
'i'raab'	8	2	0.01	'i'raab'
is'	3	2	0.01	is', 'is'
j'ai	4	4	0.01	j'ai, 'j'ai
mangé'	6	2	0.01	mangé'
m'appelle	9	2	0.01	m'appelle
metacognitive	13	3	0.01	metacognitive
neuf	4	3	0.01	neuf, 'neuf'
'ou	3	2	0.01	'ou, 'ou'
phenomena	9	3	0.01	phenomena
'pomme	6	2	0.01	'pomme, 'pomme'
pre	3	2	0.01	pre
que	3	3	0.01	que, que', 'que'
sais	4	4	0.01	sais
simpler	7	2	0.01	simpler
'since'	7	2	0.01	'since'
taller	6	4	0.01	taller, 'taller, taller', 'taller'
taught	6	3	0.01	taught
toolkit	7	2	0.01	toolkit
unless	6	4	0.01	unless
vais	4	2	0.01	vais
versa	5	4	0.01	versa
via	3	3	0.01	via
'what	5	2	0.01	'what, 'what'
'wlad'	6	2	0.01	'wlad'
yastatee'	9	2	0.01	yastatee', 'yastatee''
'أشتري'	7	2	0.01	'أشتري'
'أكتب	5	2	0.01	'أكتب, أكتب'
'ث'	3	2	0.01	'ث'
'حقاً	5	2	0.01	'حقاً
'ذلك'	5	2	0.01	'ذلك'
'س'	3	2	0.01	'س'
عن'	3	2	0.01	عن'
'هذه'	5	3	0.01	'هذه'
analytical	10	1	0	analytical
apparent	8	2	0	apparent, manifest
arising	7	16	0	arising, become, move, open, pass
ashamed	7	1	0	ashamed
aspectual	9	1	0	aspectual
'at'	4	1	0	'at'
ate	3	1	0	ate
avoid	5	1	0	avoid
backbone	8	22	0	backbone, connection, connective, part, support
belonging	9	3	0	belonging, letting, things
'borrowing'	11	5	0	'borrowing', dealing, get, take
boys	4	1	0	boys
'car'	5	1	0	'car'
'ce	3	1	0	'ce
changer	7	3	0	changer, modified, modifier
citation	8	12	0	citation, honor, process
conjunctions	12	16	0	conjunctions, connection, connective, point, short
consume	7	9	0	consume, engage, mouth, overwhelming, regular
core	4	12	0	content, core, sample, set
countable	9	1	0	countable
credibility	11	2	0	convincing, credibility
de'	3	1	0	de'
decades	7	2	0	decades, period
delivery	8	23	0	bring, conveying, delivery, post, save, service, transfer
'dew'	5	1	0	'dew'
'e'	3	3	0	'e', letter
easily	6	2	0	easily, easy
easing	6	19	0	change, comfort, easing, move, reduction, rest
edged	5	4	0	edged, line, progress
eradicated	10	1	0	eradicated
esp	3	1	0	esp
est'	4	1	0	est'
'eu'	4	1	0	'eu'
exchange	8	30	0	change, conversation, dealing, exchange, transfer, work
exclude	7	5	0	exclude, keep, lack
far	3	12	0	far, long, right
fingerprint	11	12	0	fingerprint, mark, process, spot
flaws	5	1	0	flaws
forgotten	9	1	0	forgotten
freely	6	1	0	freely
'gatekeeper'	12	1	0	'gatekeeper'
harshly	7	8	0	harshly, heavy, open
hear	4	10	0	comprehend, get, hear, perceive, range, session
hypothetical	12	7	0	hypothetical, theoretical, theory
impede	6	8	0	close, impede, impedes, stifle, stop
imposing	8	18	0	communicate, give, imposing, order, state, states
independent	11	7	0	independent, individual, several
ingrained	9	6	0	affect, ingrained, move
inherently	10	2	0	inherently, presence
inoffensive	11	1	0	inoffensive
interconnected	14	10	0	connect, connection, interconnected, link
isolation	9	33	0	class, divide, get, isolation, part, separate, separation
'la'	4	1	0	'la'
landscape	9	7	0	improved, landscape, stand
'le'	4	1	0	'le'
lenient	7	2	0	lenient, softly
low	3	15	0	deep, level, low, position, status
lower	5	17	0	change, lower, lowers, move, reduction
mode	4	6	0	mode, norm, status
multilingual	12	1	0	multilingual
near	4	3	0	artificial, close, near
necessitate	11	15	0	lead, mean, necessitate, poor
note	4	9	0	citation, mention, note, notes, tone
notoriously	11	1	0	notoriously
outcome	7	23	0	decision, ending, finish, outcome, resulting, separation, train
outdated	8	1	0	outdated
'p'	3	3	0	letter, 'p'
palatable	9	4	0	palatable, pronounce
pang	4	1	0	pang
parfait'	8	1	0	parfait'
pick	4	8	0	output, pick, piece, production, select, take
pluralistic	11	1	0	pluralistic
prescriptivism	14	1	0	prescriptivism
presence	8	5	0	existence, feeling, presence
prevailing	10	7	0	exist, prevailing
prior	5	1	0	prior
priority	8	3	0	preceding, priority
pursuits	8	9	0	interest, pursuits, search
'quitter'	9	1	0	'quitter'
remains	7	4	0	remains, rest, 'stiff'
repetition	10	3	0	insist, repetition
retention	9	3	0	long, retention
reticence	9	1	0	reticence
'roi'	5	1	0	'roi'
second	6	18	0	position, second, transfer
shapes	6	4	0	modeled, shapes
simplified	10	16	0	change, easy, reduce, simplified
snippets	8	2	0	piece, snippets
solutions	9	5	0	solutions, success
spheres	7	4	0	aspect, spheres
stemming	8	9	0	front, slip, stemming, stick, take
stifle	6	10	0	articulation, hot, impede, pass, stifle
thereby	7	1	0	thereby
'thick'	7	9	0	articulation, close, deep, heavy, little, short, 'thick'
trainers	8	1	0	trainers
transcends	10	4	0	existence, transcends
trente	6	1	0	trente
typically	9	5	0	normal, regular, typically
'un'	4	1	0	'un'
'uncreative'	12	1	0	'uncreative'
unfamiliar	10	1	0	unfamiliar
unintentionally	15	1	0	unintentionally
'unlearn'	9	4	0	forget, 'unlearn'
unprepared	10	1	0	unprepared
'v'	3	3	0	letter, 'v'
walk	4	18	0	associate, close, cover, move, process, walk
'académie	9	1	0	'académie
'ahlan	6	1	0	'ahlan
allez	5	1	0	allez
astatee'	8	1	0	astatee'
bidialectalism	14	1	0	bidialectalism
bikum	5	1	0	bikum
bil	3	1	0	bil
'boh	4	1	0	'boh
'bokoo'	7	1	0	'bokoo'
bolder	6	1	0	bolder
'bonjour	8	1	0	'bonjour
'ça	3	1	0	'ça
came	4	1	0	came
cefr	4	1	0	cefr
clearer	7	1	0	clearer
dataset	7	1	0	dataset
deeper	6	1	0	deeper
'deux'	6	1	0	'deux'
'doesn't	8	1	0	'doesn't
'dont'	6	1	0	'dont'
'duh	4	1	0	'duh
eap	3	1	0	eap
easier	6	1	0	easier
eaten	5	1	0	eaten
efl	3	1	0	efl
'eur	4	1	0	'eur
'everyone'	10	1	0	'everyone'
française'	10	1	0	française'
gama'a'	7	1	0	gama'a'
'ganna'	7	1	0	'ganna'
hādhirūn	8	1	0	hādhirūn
'his	4	1	0	'his
'how'	5	1	0	'how'
idhan	5	1	0	idhan
intercultural	13	1	0	intercultural
'janna'	7	1	0	'janna'
'j'avais	8	1	0	'j'avais
'j'irai'	8	1	0	'j'irai'
jussive	7	1	0	jussive
kha	3	1	0	kha
'les'	5	1	0	'les'
livre	5	1	0	livre
lvecq	5	1	0	lvecq
marhaban	8	1	0	marhaban
muet	4	1	0	muet
newer	5	1	0	newer
'otel'	6	1	0	'otel'
'où'	4	1	0	'où'
'parce	6	1	0	'parce
'partir'	8	1	0	'partir'
passé	5	1	0	passé
peux'	5	1	0	peux'
pourrais'	9	1	0	pourrais'
'pouvoir	8	1	0	'pouvoir
'puisque'	9	1	0	'puisque'
qalam	5	1	0	qalam
'qui'	5	1	0	'qui'
realia	6	1	0	realia
saad	4	1	0	saad
sa'aktub	8	1	0	sa'aktub
sa'idi	6	1	0	sa'idi
sawfa	5	1	0	sawfa
sociolects	10	1	0	sociolects
'soeur'	7	1	0	'soeur'
stronger	8	1	0	stronger
'suhr	5	1	0	'suhr
tha	3	1	0	tha
thalatha	8	1	0	thalatha
'their'	7	1	0	'their'
tilka	5	1	0	tilka
tullab'	7	1	0	tullab'
'une'	5	1	0	'une'
'vouloir	8	1	0	'vouloir
walakin	7	1	0	walakin
wrote	5	1	0	wrote
'ya	3	1	0	'ya
yabḥath	7	1	0	yabḥath
أَرىٰ	5	1	0	أَرىٰ
'أبحث	5	1	0	'أبحث
'إذًا'	6	1	0	'إذًا'
'أرى'	5	1	0	'أرى'
'استطيع	7	1	0	'استطيع
'أشوف'	6	1	0	'أشوف'
الحاضرون'	9	1	0	الحاضرون'
القلم'	6	1	0	القلم'
'أيها	5	1	0	'أيها
'بـ'	4	1	0	'بـ'
'تلك'	5	1	0	'تلك'
'ثلاثة'	7	1	0	'ثلاثة'
'خ'	3	1	0	'خ'
'سـ'	4	1	0	'سـ'
سأكتب	5	1	0	سأكتب
'سوف'	5	1	0	'سوف'
'ص'	3	1	0	'ص'
'لم'	4	1	0	'لم'
'لن'	4	1	0	'لن'
'لو'	4	1	0	'لو'
'مرحباً	7	1	0	'مرحباً
'و'	3	1	0	'و'
ولاد'	5	1	0	ولاد'
'ولكن'	6	1	0	'ولكن'
'يبحث	5	1	0	'يبحث
'يستطيع'	8	1	0	'يستطيع'
'يشترى'	7	1	0	'يشترى'
'يشتري'	7	1	0	'يشتري'
