# Supplementary material
Source: Research Square preprint supplement (doi:10.21203/rs.3.rs-9540613/v1)
Supplement: Supplementary file 2 [file 0e853776d942ee23eda9e1db.xlsx]

## Sheet: Sheet1
Gender	Teaching Specialization	Current Teaching Level	Years of Teaching Experience	Highest Educational	A1	A2	A3	A4	A5	total Arabic Language Attitudes	B1	B2	B3	B4	B5	total English Language Attitudes	C1	C2	C3	C4	C5	total French Language Attitudes	1. How often do you correct non-standard forms in students’ oral production?	1. How often do you incorporate discussions of linguistic variation (e.g., dialects, accents) into your lessons?	1. How often do you use non-standard language varieties in your teaching to illustrate cultural or contextual differences?	Reported Practices	Correcting non-standard language features improves students’ proficiency in the standard variety.	Incorporating diverse language varieties in lessons enhances student engagement.	Teaching cultural contexts alongside language varieties improves learning outcomes.	Perceived Effectiveness	1. How prepared do you feel to handle linguistic variation in your classroom?
1	1	1	1	1	4	5	5	5	4	23	5	4	3	3	4	19	5	4	4	4	4	21	3	4	5	12	5	4	3	12	4
1	1	1	1	1	5	5	5	5	5	25	5	4	5	4	5	23	5	5	5	5	5	25	5	5	5	15	4	5	4	13	4
1	1	1	1	1	5	5	5	5	5	25	5	5	5	5	5	25	5	5	5	5	4	24	5	5	5	15	5	5	5	15	5
1	1	1	1	1	5	5	5	5	5	25	4	5	4	5	4	22	5	5	5	5	5	25	5	5	5	15	5	5	5	15	5
1	1	1	1	1	5	4	5	5	4	23	5	5	3	5	4	22	5	5	5	5	4	24	4	4	5	13	4	4	4	12	5
1	1	1	1	1	5	5	5	5	5	25	5	5	5	5	5	25	5	5	5	5	5	25	5	5	5	15	5	5	5	15	5
1	1	1	1	1	5	5	5	5	5	25	5	5	5	5	5	25	5	5	5	5	5	25	5	5	5	15	5	5	5	15	5
1	1	1	1	1	3	2	3	2	5	15	1	3	1	2	3	10	2	3	3	2	3	13	3	2	3	8	2	1	2	5	1
1	1	1	1	1	3	2	3	2	5	15	1	3	1	2	3	10	2	3	3	5	3	16	3	2	2	7	2	5	2	9	5
1	1	1	1	1	1	2	1	1	1	6	1	2	2	1	2	8	2	1	2	2	1	8	1	3	1	5	2	1	1	4	1
1	1	1	1	1	1	2	1	1	1	6	2	2	1	2	2	9	1	2	2	2	1	8	2	3	2	7	2	1	1	4	1
1	1	1	1	1	4	4	5	5	3	21	5	3	5	4	5	22	5	4	3	4	4	20	5	4	5	14	4	5	3	12	5
1	1	1	1	1	4	4	5	5	3	21	5	3	5	4	5	22	5	4	3	4	4	20	5	4	5	14	4	5	3	12	5
1	1	1	1	1	5	5	5	5	4	24	4	5	4	5	5	23	4	5	4	5	5	23	5	5	4	14	5	5	4	14	5
1	1	1	1	1	2	4	2	2	4	14	2	2	2	2	2	10	4	4	2	2	4	16	4	2	4	10	4	4	2	10	2
1	1	1	1	1	5	5	4	4	4	22	5	5	4	5	4	23	4	4	4	4	5	21	5	5	5	15	5	5	5	15	5
1	1	1	1	1	4	4	4	4	4	20	4	4	4	4	4	20	4	4	4	4	4	20	4	4	4	12	4	4	4	12	4
1	1	1	1	1	4	5	5	4	5	23	5	5	4	5	3	22	4	5	3	5	5	22	3	5	3	11	5	4	5	14	5
1	1	1	1	1	4	4	4	4	4	20	4	4	4	4	4	20	4	4	4	4	4	20	4	4	4	12	4	4	4	12	4
1	1	1	1	1	4	4	4	4	4	20	4	4	4	4	4	20	4	4	4	4	4	20	4	4	4	12	4	4	4	12	4
1	1	1	1	1	4	4	5	5	4	22	5	4	4	4	4	21	5	4	5	4	5	23	5	4	4	13	4	5	4	13	4
1	1	1	1	1	5	5	5	5	5	25	5	5	5	5	5	25	5	5	5	5	5	25	5	5	5	15	5	5	5	15	5
1	1	1	1	1	5	5	5	5	5	25	4	4	4	4	4	20	5	4	4	4	5	22	5	4	4	13	5	4	5	14	4
1	1	1	1	1	5	4	4	4	3	20	5	5	4	5	4	23	3	4	4	5	3	19	5	4	4	13	5	3	4	12	5
1	1	1	1	1	4	4	4	4	4	20	4	4	4	4	4	20	5	4	4	4	4	21	4	4	4	12	4	4	4	12	4
1	1	1	1	1	4	4	4	4	4	20	4	4	4	4	4	20	4	4	4	4	4	20	4	4	5	13	4	4	4	12	4
1	1	1	1	1	4	4	4	5	4	21	4	4	5	4	4	21	5	4	4	4	4	21	4	4	4	12	5	4	4	13	4
1	1	1	1	1	4	4	4	4	4	20	5	4	4	4	4	21	4	4	4	4	4	20	4	4	4	12	4	4	4	12	4
1	1	1	1	1	4	4	4	4	4	20	4	5	4	4	4	21	4	4	4	4	4	20	4	4	4	12	5	4	4	13	4
1	1	1	1	1	4	4	4	4	4	20	4	4	4	4	4	20	4	4	4	4	4	20	4	4	4	12	4	4	4	12	4
1	1	1	1	1	4	4	4	4	4	20	4	4	4	4	4	20	4	4	4	4	4	20	4	4	4	12	4	4	4	12	4
1	1	1	1	1	4	4	5	4	4	21	4	4	4	4	4	20	4	4	4	4	4	20	4	4	4	12	4	4	4	12	4
1	1	1	1	1	5	4	5	4	2	20	3	5	4	5	4	21	5	5	5	4	4	23	4	4	4	12	3	3	3	9	3
1	1	1	1	1	4	5	4	4	4	21	5	4	4	4	5	22	4	4	4	4	4	20	4	4	4	12	5	5	4	14	5
1	1	1	1	1	4	3	4	4	5	20	4	3	4	3	3	17	4	3	4	3	4	18	3	3	3	9	3	4	4	11	4
1	1	1	1	1	4	4	4	4	4	20	4	4	4	4	4	20	4	4	4	4	4	20	4	4	4	12	4	4	4	12	4
1	1	1	1	1	5	4	4	4	5	22	4	4	5	4	4	21	5	4	5	4	5	23	5	5	4	14	5	5	5	15	5
1	1	1	1	1	4	5	5	2	5	21	5	5	4	5	5	24	5	5	4	4	5	23	5	4	5	14	5	5	5	15	5
1	1	1	1	1	5	4	4	4	5	22	4	4	5	4	4	21	5	4	5	5	5	24	5	5	4	14	5	5	5	15	5
1	1	1	1	1	1	1	1	1	1	5	1	1	1	1	1	5	1	1	2	1	2	7	1	1	2	4	2	2	2	6	1
1	1	1	1	1	2	2	2	2	2	10	2	2	2	2	1	9	2	1	2	2	2	9	2	2	2	6	2	2	2	6	1
1	1	1	1	1	5	4	4	4	5	22	4	5	4	4	3	20	5	4	4	5	5	23	3	3	4	10	5	5	3	13	4
1	1	1	1	1	5	4	4	4	5	22	4	4	5	4	4	21	5	4	5	5	5	24	5	5	4	14	5	5	5	15	4
1	1	1	1	1	5	4	4	4	5	22	4	4	5	4	4	21	5	4	5	5	5	24	5	5	4	14	5	5	5	15	5
1	1	1	1	1	5	5	5	4	4	23	5	5	5	4	5	24	5	5	4	5	5	24	5	5	5	15	4	4	4	12	5
1	1	1	1	1	5	5	5	4	5	24	4	4	4	4	4	20	5	5	5	4	4	23	4	4	5	13	5	5	4	14	4
1	1	1	1	1	4	5	5	5	4	23	4	5	4	5	4	22	5	5	4	5	4	23	5	4	4	13	5	4	4	13	4
1	1	1	1	1	4	3	5	5	3	20	3	3	3	4	3	16	5	4	4	4	3	20	5	4	5	14	2	3	3	8	3
1	1	1	1	1	4	5	5	4	5	23	4	5	5	5	5	24	4	5	4	5	4	22	5	5	5	15	5	4	4	13	4
1	1	1	1	1	4	5	5	5	4	23	5	5	4	4	5	23	5	5	5	5	4	24	4	5	4	13	5	5	5	15	5
1	1	1	1	1	4	5	5	4	5	23	5	4	5	5	5	24	4	5	4	5	4	22	4	5	5	14	4	5	4	13	4
1	1	1	1	1	4	5	5	5	4	23	5	4	5	4	4	22	4	5	4	5	4	22	4	4	5	13	4	5	4	13	5
1	1	1	1	1	4	4	5	5	5	23	5	4	5	4	5	23	5	4	5	5	4	23	5	5	5	15	4	5	4	13	4
1	1	1	1	1	5	5	5	4	4	23	5	4	4	5	5	23	5	5	5	5	5	25	4	5	5	14	5	4	5	14	4
1	1	1	1	1	5	5	5	5	5	25	5	5	5	5	5	25	5	5	5	5	5	25	5	5	5	15	5	5	5	15	5
1	1	1	1	1	4	4	5	4	4	21	4	5	4	4	4	21	4	4	4	4	4	20	4	4	4	12	4	4	4	12	4
1	1	1	1	1	3	5	3	3	4	18	4	5	4	3	4	20	4	4	4	4	3	19	4	5	5	14	4	5	3	12	5
1	1	1	1	1	4	5	4	5	4	22	5	4	5	3	3	20	3	3	3	5	5	19	5	5	3	13	5	4	3	12	4
1	1	1	1	1	4	4	4	4	4	20	4	4	4	4	4	20	5	5	5	5	5	25	5	5	5	15	5	5	5	15	5
1	1	1	1	1	4	5	5	4	4	22	5	4	4	5	5	23	4	5	4	5	5	23	5	5	5	15	4	5	5	14	5
1	1	1	1	1	4	5	5	5	5	24	3	3	3	5	5	19	4	5	4	4	5	22	4	4	5	13	4	4	5	13	4
1	1	1	1	1	5	5	5	3	2	20	4	2	2	1	2	11	3	2	2	5	5	17	5	5	5	15	5	5	5	15	5
1	1	1	1	1	4	4	4	5	5	22	4	4	4	5	5	22	4	4	4	4	5	21	4	4	4	12	5	5	5	15	4
1	1	1	1	1	5	5	5	5	4	24	4	5	4	4	5	22	5	5	5	4	5	24	4	3	5	12	5	5	3	13	4
1	1	1	1	1	5	4	5	4	4	22	4	5	4		5	18	4	5	4	5	4	22	4	5	4	13	4	3	3	10	4
1	1	1	1	1	5	5	5	5	5	25	5	5	4	4	5	23	5	5	4	5	5	24	5	5	4	14	4	4	4	12	5
1	1	1	1	1	5	3	4	5	4	21	3	4	4	5	3	19	4	5	5	2	5	21	5	4	3	12	4	5	3	12	4
1	1	1	1	1	4	4	4	5	5	22	5	4	4	5	5	23	5	5	4	4	4	22	5	4	4	13	4	3	4	11	4
1	1	1	1	1	5	3	4	5	4	21	2	3	3	4	4	16	5	5	5	2	5	22	5	4	4	13	3	3	5	11	5
1	1	1	1	1	5	4	4	3	4	20	5	5	4	5	4	23	3	4	4	5	2	18	5	4	4	13	3	2	4	9	5
1	1	1	1	1	5	5	5	4	4	23	5	4	4	5	5	23	4	5	4	5	4	22	4	4	5	13	4	5	5	14	4
1	1	1	1	1	4	5	4	4	4	21	4	4	3	4	4	19	4	4	4	5	4	21	4	4	4	12	4	3	4	11	5
1	1	1	1	1	4	5	5	4	5	23	5	4	5	4	5	23	5	4	4	4	5	22	5	4	5	14	4	5	4	13	4
1	1	1	1	1	4	5	5	5	5	24	5	5	5	5	5	25	5	4	5	5	5	24	5	5	5	15	5	5	5	15	5
1	1	1	1	1	5	5	5	5	4	24	4	4	4	4	3	19	5	4	5	5	4	23	5	4	5	14	4	4	4	12	5
1	1	1	1	1	5	5	5	5	4	24	4	4	4	4	3	19	5	4	5	4	5	23	5	5	4	14	5	5	5	15	5
1	1	1	1	1	4	5	5	4	5	23	4	5	5	5	5	24	5	5	4	4	4	22	4	4	3	11	4	5	4	13	5
1	1	1	1	1	4	4	4	4	4	20	5	4	4	4	5	22	5	4	5	5	5	24	5	5	5	15	5	5	5	15	4
1	1	1	1	1	5	3	4	5	5	22	5	5	5	5	4	24	5	5	4	4	4	22	5	4	5	14	5	5	5	15	5
1	1	1	1	1	5	5	5	5	5	25	5	5	5	5	5	25	5	5	5	5	5	25	5	5	5	15	5	5	5	15	5
1	1	1	1	1	4	4	4	4	4	20	4	5	3	3	5	20	4	5	3	4	4	20	4	5	4	13	3	3	3	9	5
1	1	1	1	1	5	5	4	4	4	22	5	5	4	4	5	23	5	5	5	4	5	24	5	5	4	14	5	4	4	13	5
1	1	1	1	1	5	5	4	5	5	24	4	5	5	5	4	23	5	4	5	5	5	24	5	4	5	14	5	4	5	14	4
1	1	1	1	1	5	5	5	5	4	24	5	5	5	5	4	24	5	5	5	5	5	25	5	4	4	13	5	5	5	15	5
1	1	2	1	1	4	5	5	4	4	22	5	4	4	5	5	23	4	4	4	5	4	21	5	4	4	13	5	5	4	14	4
1	1	2	1	1	4	4	4	4	5	21	5	4	4	4	5	22	5	4	4	4	5	22	5	5	5	15	5	5	5	15	5
1	1	2	1	1	5	5	5	5	5	25	5	5	5	5	5	25	5	5	5	5	5	25	5	5	5	15	5	5	5	15	5
1	1	2	1	1	5	5	5	4	5	24	5	4	5	5	4	23	4	5	5	5	4	23	5	4	5	14	5	4	5	14	5
1	1	2	1	1	5	4	4	5	4	22	4	3	4	4	4	19	4	4	4	5	5	22	4	4	5	13	4	4	5	13	5
1	1	2	1	1	5	5	5	5	5	25	5	5	5	5	5	25	5	5	5	5	5	25	5	5	5	15	5	5	5	15	5
1	1	2	1	1	4	4	4	4	4	20	4	4	4	4	4	20	4	4	4	4	4	20	4	4	4	12	4	4	4	12	4
1	1	2	1	1	5	5	5	4	5	24	5	4	4	3	4	20	5	5	4	4	4	22	5	5	5	15	5	5	4	14	5
1	1	2	1	1	5	5	5	5	5	25	5	5	5	5	5	25	5	5	5	5	5	25	5	5	5	15	5	5	5	15	5
1	1	2	1	1	4	4	4	4	4	20	4	4	5	5	5	23	4	4	4	4	5	21	4	4	5	13	5	5	5	15	4
1	1	2	1	1	5	5	4	4	4	22	4	4	4	5	5	22	4	4	4	4	4	20	4	4	5	13	5	5	3	13	4
1	1	2	1	1	4	5	5	4	5	23	5	4	4	3	5	21	4	5	5	5	5	24	5	4	4	13	3	4	5	12	4
1	1	2	1	1	5	4	4	5	4	22	5	3	5	5	4	22	5	5	5	5	5	25	5	5	5	15	5	4	5	14	3
1	1	2	1	1	4	4	5	5	4	22	4	4	5	5	5	23	4	4	3	5	5	21	4	4	4	12	4	5	4	13	4
1	1	2	1	1	4	5	5	4	5	23	5	4	4	4	4	21	5	5	5	5	4	24	4	3	4	11	5	5	3	13	5
1	1	2	1	1	5	4	4	5	4	22	5	4	4	3	4	20	3	3	3	4	5	18	4	5	4	13	3	3	3	9	4
1	1	2	1	1	4	5	5	5	5	24	4	5	5	5	5	24	5	5	5	5	5	25	5	5	4	14	4	4	5	13	4
1	1	2	1	1	4	4	5	5	4	22	5	5	5	3	4	22	4	3	5	5	5	22	4	4	4	12	4	4	4	12	4
1	1	2	1	1	4	4	4	4	4	20	4	4	4	4	4	20	4	4	4	4	4	20	5	4	4	13	5	5	4	14	5
1	1	2	1	1	5	5	5	5	5	25	5	5	5	5	5	25	5	5	5	5	4	24	5	4	5	14	5	5	5	15	4
1	1	2	1	1	4	5	4	4	4	21	4	5	4	5	5	23	4	4	5	5	5	23	5	4	4	13	4	4	5	13	5
1	1	2	1	1	5	4	4	4	5	22	5	4	5	5	4	23	5	5	4	4	5	23	4	5	4	13	5	4	4	13	4
1	1	2	1	1	4	4	4	4	4	20	4	4	4	4	4	20	4	4	4	4	4	20	4	4	4	12	4	4	4	12	4
1	1	2	1	1	5	5	5	5	4	24	5	5	4	5	5	24	5	4	5	5	5	24	5	4	5	14	5	4	3	12	5
1	1	2	1	1	1	5	5	1	5	17	5	5	5	5	5	25	5	5	1	5	1	17	5	1	5	11	5	5	1	11	5
1	1	2	1	1	4	5	4	3	5	21	4	4	4	3	3	18	4	3	4	5	3	19	4	3	4	11	5	5	5	15	4
1	1	2	1	1	5	5	5	4	5	24	5	5	5	5	5	25	5	5	5	4	5	24	5	5	5	15	5	4	5	14	5
1	1	2	1	1	5	5	4	5	5	24	4	4	4	4	5	21	5	5	4	4	5	23	5	5	5	15	4	4	4	12	4
1	1	2	1	1	4	5	3	4	4	20	5	5	5	2	4	21	5	5	3	5	3	21	5	3	5	13	3	5	3	11	5
1	1	2	1	1	4	5	4	5	4	22	4	3	4	3	4	18	5	5	4	4	4	22	5	5	4	14	5	4	3	12	4
1	1	2	1	1	5	4	4	4	4	21	4	4	4	4	5	21	5	5	5	4	4	23	4	4	4	12	5	4	4	13	4
1	1	2	1	1	4	4	4	4	4	20	4	5	5	4	5	23	4	5	5	5	4	23	4	4	4	12	4	5	5	14	4
1	1	2	1	1	4	4	4	4	4	20	4	4	4	4	4	20	4	4	4	4	4	20	4	4	4	12	4	4	4	12	4
1	1	2	1	1	4	4	4	4	4	20	4	4	4	4	4	20	5	4	4	4	4	21	4	4	4	12	4	4	4	12	4
1	1	2	1	1	4	5	4	5	4	22	4	5	4	4	4	21	4	5	4	4	4	21	5	5	5	15	4	5	5	14	4
1	1	2	1	1	4	4	4	4	4	20	5	4	4	4	5	22	4	5	5	5	1	20	3	5	4	12	3	4	5	12	5
1	1	2	1	1	4	4	5	5	4	22	5	5	4	4	4	22	4	4	4	4	4	20	4	4	4	12	5	4	4	13	4
1	1	2	1	1	4	5	5	5	4	23	4	5	5	5	5	24	5	4	5	4	4	22	4	4	4	12	5	4	5	14	5
1	1	2	1	1	5	5	5	5	5	25	4	5	5	5	5	24	5	4	5	5	5	24	5	5	4	14	5	5	5	15	4
1	1	2	1	1	5	5	4	5	4	23	5	4	5	5	5	24	4	3	4	5	5	21	4	4	4	12	5	4	4	13	4
1	1	2	1	1	5	5	5	5	4	24	5	5	5	5	5	25	5	5	5	4	5	24	5	5	4	14	5	5	4	14	4
1	1	2	1	1	4	4	4	5	4	21	4	4	4	4	5	21	5	4	4	5	4	22	4	5	4	13	5	4	4	13	5
1	1	2	1	1	5	3	4	4	5	21	5	5	3	4	4	21	4	3	4	4	5	20	4	4	5	13	4	4	3	11	5
1	1	2	1	1	4	4	4	5	5	22	5	4	5	5	4	23	5	4	4	5	5	23	4	5	5	14	4	4	5	13	4
1	1	2	1	1	4	5	5	5	4	23	3	5	3	5	3	19	5	4	5	4	4	22	5	5	5	15	4	5	5	14	5
1	1	2	1	1	5	4	5	5	5	24	5	5	5	5	5	25	5	5	5	5	4	24	5	5	5	15	5	5	5	15	5
1	1	2	1	1	4	4	4	5	5	22	5	5	5	4	5	24	4	5	5	5	5	24	4	5	5	14	4	5	4	13	5
1	1	2	1	1	5	5	5	5	5	25	5	5	5	5	5	25	5	5	5	5	5	25	4	4	5	13	5	5	4	14	4
1	1	2	1	1	5	5	5	5	5	25	5	5	4	5	4	23	4	4	5	5	5	23	5	5	5	15	4	4	4	12	5
1	1	2	1	1	5	5	5	5	5	25	5	5	5	5	5	25	5	5	5	5	5	25	5	5	5	15	5	5	5	15	5
1	1	2	1	1	5	5	5	5	4	24	5	4	5	5	5	24	5	5	5	4	5	24	5	4	5	14	5	4	5	14	5
1	1	2	1	1	4	4	5	4	4	21	4	4	5	5	4	22	4	5	5	4	4	22	5	4	4	13	4	5	4	13	5
1	1	2	1	1	4	4	4	4	4	20	5	5	3	5	3	21	4	4	4	5	4	21	4	5	5	14	4	4	5	13	5
1	1	2	1	1	4	5	5	4	5	23	5	4	5	5	4	23	5	5	4	5	4	23	4	5	5	14	5	5	4	14	5
1	1	2	1	1	5	5	4	5	5	24	4	5	4	5	4	22	5	5	5	5	5	25	4	5	5	14	5	5	4	14	5
1	1	2	1	1	4	4	4	4	4	20	4	4	4	5	3	20	3	4	3	3	4	17	3	3	3	9	5	5	4	14	4
1	1	2	1	1	4	3	4	4	4	19	5	4	4	5	5	23	4	3	4	4	5	20	4	4	3	11	4	4	3	11	4
1	1	2	1	1	5	5	5	5	5	25	5	5	5	5	5	25	5	5	5	5	5	25	5	5	5	15	5	5	4	14	4
1	1	2	1	1	5	4	4	4	5	22	5	4	4	5	4	22	4	4	4	5	5	22	5	4	4	13	5	5	5	15	5
1	1	2	1	1	5	5	4	4	4	22	4	4	4	4	5	21	4	5	5	5	5	24	4	5	5	14	5	5	5	15	5
1	1	2	1	1	5	5	5	5	5	25	5	5	5	5	5	25	5	4	5	5	5	24	5	4	5	14	5	4	5	14	5
1	1	2	1	1	4	5	5	4	5	23	4	4	4	5	5	22	4	5	5	5	4	23	4	5	4	13	5	4	5	14	5
1	1	2	1	1	5	5	5	5	5	25	5	5	5	3	2	20	3	3	3	3	3	15	5	5	4	14	4	3	2	9	4
1	1	2	1	1	5	5	5	5	4	24	4	5	4	4	4	21	4	4	5	5	5	23	5	4	5	14	5	4	5	14	5
1	1	2	1	1	5	5	5	5	4	24	5	4	5	4	5	23	5	4	5	5	5	24	5	4	4	13	5	4	5	14	5
1	1	2	1	1	5	5	5	5	5	25	5	5	5	5	5	25	5	5	4	4	4	22	5	5	5	15	5	5	4	14	5
1	1	2	1	1	4	5	4	5	4	22	5	4	5	5	4	23	5	5	4	5	4	23	4	5	5	14	5	4	5	14	4
1	1	2	1	1	5	4	5	5	4	23	5	4	4	5	5	23	4	4	4	5	5	22	4	5	4	13	5	4	4	13	4
1	1	2	1	1	5	5	5	4	5	24	5	5	4	5	5	24	5	5	4	4	4	22	5	4	5	14	4	4	3	11	5
1	1	2	1	1	5	5	5	5	5	25	5	5	5	4	4	23	4	4	4	4	5	21	5	4	4	13	5	5	5	15	4
1	1	2	1	1	4	4	4	4	4	20	4	4	4	4	4	20	4	4	4	4	4	20	4	4	4	12	4	4	4	12	4
1	1	2	1	1	4	5	4	4	5	22	5	5	5	5	3	23	3	3	3	4	4	17	4	3	3	10	3	3	3	9	5
1	1	2	1	1	5	5	5	4	4	23	5	5	3	3	5	21	5	4	5	3	3	20	3	3	4	10	2	2	5	9	5
1	1	2	1	1	4	4	4	4	4	20	2	2	2	2	2	10	3	3	4	4	4	18	4	4	4	12	4	5	5	14	5
1	1	2	1	1	5	5	4	4	4	22	3	5	5	5	4	22	5	4	4	4	5	22	4	4	5	13	5	4	5	14	3
1	1	2	1	1	5	4	4	5	4	22	5	4	4	5	4	22	5	4	5	5	4	23	4	4	4	12	5	3	5	13	4
1	1	2	1	1	4	5	4	5	4	22	5	3	4	4	5	21	4	5	3	2	4	18	5	4	4	13	3	3	5	11	4
1	1	2	1	1	5	4	5	5	5	24	5	5	5	5	5	25	5	5	5	5	5	25	5	5	5	15	5	5	5	15	5
1	1	2	1	1	4	5	4	5	4	22	4	5	4	5	4	22	4	5	4	5	4	22	4	5	4	13	4	5	4	13	4
1	1	2	1	1	4	4	4	5	5	22	4	4	5	4	5	22	4	5	4	5	5	23	5	4	5	14	5	4	5	14	5
1	1	2	1	1	5	5	5	5	5	25	5	5	5	5	5	25	5	5	5	5	5	25	5	5	5	15	5	5	5	15	5
1	1	2	2	1	5	3	5	5	5	23	5	4	4	4	5	22	5	4	5	5	5	24	4	5	4	13	5	5	5	15	4
1	1	2	2	1	4	5	4	5	4	22	5	3	4	4	5	21	4	5	3	2	4	18	5	4	4	13	3	3	5	11	4
1	1	2	2	1	4	4	4	4	4	20	4	5	5	5	5	24	4	4	4	4	5	21	5	5	5	15	5	4	4	13	4
1	1	2	2	1	5	4	5	5	5	24	4	4	4	4	4	20	5	5	4	5	5	24	5	5	4	14	3	3	3	9	4
1	1	2	2	1	5	5	5	5	5	25	4	4	4	4	3	19	4	4	5	4	4	21	4	3	5	12	5	4	4	13	5
1	1	2	2	1	5	5	5	5	5	25	5	5	5	5	5	25	5	5	5	5	5	25	5	5	5	15	5	5	5	15	5
1	1	2	2	1	5	5	5	4	4	23	4	5	5	4	4	22	4	4	4	4	4	20	4	4	5	13	5	4	4	13	4
1	1	2	2	1	4	4	4	4	4	20	5	4	5	3	4	21	5	5	4	3	5	22	5	5	4	14	5	3	3	11	3
1	1	2	2	1	1	5	3	1	3	13	3	5	5	3	5	21	4	4	3	3	1	15	5	4	4	13	4	4	4	12	5
1	1	2	2	1	5	5	5	5	5	25	5	5	5	5	5	25	5	5	5	5	5	25	5	5	5	15	5	5	5	15	5
1	1	2	2	1	5	5	5	5	5	25	5	5	5	5	5	25	5	5	5	5	5	25	5	5	5	15	5	5	5	15	5
1	1	2	2	1	4	4	4	4	5	21	3	4	5	5	5	22	5	5	4	4	5	23	4	4	5	13	4	5	4	13	4
1	1	2	2	1	4	4	4	4	4	20	4	4	4	4	4	20	4	4	4	4	4	20	4	4	4	12	4	4	4	12	4
1	1	2	2	1	5	5	5	5	4	24	4	4	4	4	4	20	5	5	5	5	4	24	5	5	5	15	5	4	4	13	4
1	1	2	2	1	5	5	5	5	5	25	5	5	5	5	5	25	5	5	5	5	5	25	5	5	5	15	5	5	5	15	5
1	1	2	2	1	5	4	4	5	5	23	5	4	5	4	5	23	4	5	5	3	5	22	4	5	4	13	5	5	4	14	4
1	1	2	2	1	4	4	5	5	5	23	5	5	4	4	4	22	4	4	5	5	4	22	4	4	4	12	3	5	3	11	4
1	1	2	2	1	5	5	5	5	5	25	5	5	5	5	5	25	5	5	5	5	5	25	5	5	5	15	5	5	5	15	5
1	1	2	2	1	4	4	4	4	4	20	4	4	4	4	4	20	4	4	4	4	4	20	4	4	4	12	4	4	4	12	4
1	1	2	2	1	5	5	4	5	5	24	4	4	4	5	5	22	5	5	5	5	4	24	5	5	5	15	4	3	4	11	5
1	1	2	2	1	4	4	5	5	4	22	4	4	4	5	5	22	5	5	5	5	5	25	4	5	4	13	5	5	5	15	4
1	1	2	2	1	4	4	5	5	4	22	4	5	5	5	5	24	4	4	4	5	4	21	4	4	4	12	4	4	4	12	4
1	1	2	2	1	5	4	5	5	5	24	5	4	5	4	4	22	5	5	4	4	5	23	5	4	4	13	4	4	4	12	4
2	1	2	2	1	5	5	4	5	4	23	5	5	4	5	5	24	4	4	4	4	4	20	4	4	5	13	5	5	4	14	5
2	1	2	2	1	5	5	4	5	4	23	4	4	5	4	4	21	5	5	5	5	5	25	5	4	4	13	5	4	4	13	4
2	1	2	2	1	5	4	4	5	5	23	4	4	4	3	4	19	4	4	4	4	4	20	4	5	5	14	5	4	5	14	4
2	1	2	2	1	5	4	4	5	5	23	5	4	5	4	5	23	4	5	5	4	4	22	4	5	5	14	5	4	4	13	4
2	1	2	2	1	4	5	5	4	3	21	4	5	4	5	4	22	5	5	4	5	5	24	5	4	5	14	5	5	4	14	4
2	1	2	2	1	4	5	5	4	4	22	5	5	4	5	4	23	4	4	5	4	4	21	5	4	4	13	5	4	5	14	4
2	1	2	2	1	4	5	5	5	5	24	5	4	5	4	4	22	5	5	4	5	5	24	5	5	4	14	5	4	4	13	5
2	1	2	2	1	4	4	4	5	5	22	4	5	5	4	5	23	4	4	5	5	4	22	5	4	4	13	5	5	4	14	5
2	1	2	2	1	4	4	5	5	4	22	4	5	4	4	4	21	5	5	5	4	5	24	5	5	5	15	5	4	5	14	4
2	1	2	2	1	5	4	4	4	5	22	5	4	5	5	3	22	5	4	4	5	4	22	4	4	4	12	5	5	4	14	5
2	1	2	2	1	5	5	5	4	4	23	5	4	5	4	4	22	4	5	5	4	4	22	4	4	4	12	5	4	5	14	4
2	1	2	2	1	5	5	4	5	5	24	4	5	4	5	5	23	5	3	4	5	5	22	4	4	4	12	5	5	4	14	5
2	1	2	2	1	5	5	5	5	5	25	5	5	5	5	5	25	5	5	5	5	5	25	5	5	5	15	5	5	5	15	5
2	1	2	2	1	4	4	4	5	4	21	4	5	4	4	4	21	4	4	3	4	4	19	3	4	5	12	5	4	5	14	4
2	1	2	2	1	5	5	5	4	5	24	4	5	3	2	3	17	5	4	5	2	2	18	5	2	4	11	1	4	3	8	5
2	1	2	2	1	5	5	4	5	5	24	5	5	4	4	5	23	5	5	4	4	5	23	5	5	4	14	3	5	5	13	5
2	1	2	2	1	5	5	5	4	5	24	4	5	3	2	3	17	4	5	4	2	2	17	5	2	4	11	1	4	3	8	5
2	1	2	2	1	5	5	4	5	5	24	4	5	4	4	5	22	5	5	4	4	5	23	5	5	4	14	3	5	5	13	5
2	1	2	2	1	5	5	4	5	5	24	4	5	4	4	5	22	5	5	5	5	5	25	5	5	4	14	3	5	5	13	5
2	1	2	2	1	5	5	5	5	5	25	4	5	4	4	4	21	4	5	4	4	4	21	5	4	4	13	4	4	4	12	5
2	1	2	2	1	5	5	5	5	5	25	5	5	5	5	5	25	5	5	5	5	5	25	5	5	5	15	5	5	5	15	5
2	1	2	2	1	4	5	5	5	5	24	5	4	5	5	5	24	4	4	4	5	5	22	5	5	5	15	4	5	4	13	5
2	1	2	2	1	5	5	5	4	5	24	5	5	4	2	5	21	5	5	2	5	4	21	5	5	5	15	5	5	4	14	5
2	1	2	2	1	4	4	4	4	4	20	4	4	4	4	4	20	4	4	4	4	4	20	4	4	4	12	4	4	5	13	5
2	1	2	2	1	5	5	5	5	5	25	5	5	5	5	5	25	5	5	5	5	5	25	5	5	5	15	5	5	5	15	5
2	1	2	2	1	4	5	4	5	4	22	3	5	4	3	5	20	4	4	4	5	3	20	5	4	5	14	4	4	3	11	5
2	1	2	2	1	5	5	3	2	5	20	5	2	4	4	3	18	5	4	4	4	4	21	3	3	4	10	4	4	4	12	5
2	1	2	2	2	5	5	5	5	5	25	5	5	5	5	5	25	5	5	5	5	5	25	5	5	5	15	5	5	5	15	5
2	1	2	2	2	5	5	5	5	5	25	5	5	5	5	5	25	5	5	5	5	5	25	5	5	5	15	5	5	5	15	5
2	1	2	2	2	5	5	4	4	4	22	5	4	4	4	4	21	4	4	4	5	4	21	5	5	4	14	3	4	4	11	4
2	1	2	2	2	5	5	4	5	5	24	4	5	4	4	5	22	5	5	5	5	5	25	5	5	4	14	3	5	5	13	5
2	1	2	2	2	5	5	4	5	5	24	4	5	4	4	5	22	5	5	4	4	5	23	5	5	4	14	5	5	5	15	5
2	1	2	2	2	5	5	4	5	5	24	4	5	4	4	5	22	5	5	4	4	5	23	5	5	4	14	3	5	5	13	5
2	1	2	2	2	5	5	5	5	5	25	5	5	5	5	5	25	5	3	4	3	4	19	4	3	3	10	4	4	4	12	3
2	1	2	2	2	5	5	4	5	5	24	4	5	4	4	5	22	5	5	4	5	5	24	5	5	4	14	3	5	5	13	5
2	1	2	2	2	5	5	5	5	5	25	4	5	4	4	4	21	4	5	4	4	4	21	5	4	4	13	4	4	4	12	5
2	1	2	2	2	5	5	4	5	5	24	4	5	4	4	5	22	5	5	5	5	5	25	5	5	4	14	3	5	5	13	5
2	1	2	2	2	4	5	3	5	4	21	5	4	4	5	4	22	5	5	5	4	4	23	4	5	3	12	4	5	5	14	5
2	1	2	2	2	4	4	4	4	4	20	4	4	4	4	4	20	4	4	4	4	4	20	4	4	4	12	4	4	4	12	4
2	1	2	2	2	5	5	5	5	5	25	4	3	3	3	3	16	4	5	4	5	5	23	3	4	4	11	3	4	4	11	3
2	1	2	2	2	5	5	5	5	5	25	5	5	5	5	5	25	5	5	5	5	5	25	5	5	5	15	5	5	5	15	5
2	1	2	2	2	5	5	4	5	5	24	4	5	4	4	5	22	5	5	4	5	5	24	5	5	4	14	3	5	5	13	5
2	1	2	2	2	5	5	4	5	5	24	4	5	4	4	5	22	5	5	4	5	5	24	5	5	4	14	3	5	5	13	5
2	1	2	2	2	4	4	4	4	4	20	5	4	5	3	4	21	5	5	4	3	5	22	5	5	4	14	5	3	3	11	3
2	1	2	2	2	5	5	4	5	5	24	4	5	4	4	5	22	5	5	4	5	5	24	5	5	4	14	3	5	5	13	5
2	1	2	2	2	5	5	4	5	5	24	4	5	4	4	5	22	5	5	4	5	5	24	5	5	4	14	3	5	5	13	5
2	1	2	2	2	5	5	4	5	5	24	4	5	4	4	5	22	5	5	4	5	5	24	5	5	4	14	3	5	5	13	5
2	2	2	2	2	5	5	4	5	5	24	4	5	4	4	5	22	5	5	4	5	5	24	5	5	4	14	3	5	5	13	5
2	2	2	2	2	5	5	4	5	5	24	4	5	4	4	5	22	5	5	5	5	5	25	5	5	4	14	3	5	5	13	5
2	2	2	2	2	5	5	4	5	5	24	4	5	4	4	5	22	5	5	4	5	5	24	5	5	4	14	3	5	5	13	5
2	2	2	2	2	5	5	4	5	5	24	4	5	4	4	5	22	5	5	5	5	5	25	5	5	4	14	3	5	5	13	5
2	2	2	2	2	5	5	4	5	4	23	5	4	5	4	4	22	4	5	5	5	5	24	5	5	4	14	3	5	5	13	5
2	2	2	2	2	5	5	4	5	5	24	4	5	4	4	5	22	4	5	4	4	5	22	5	4	4	13	3	4	5	12	5
2	2	2	2	2	5	5	4	5	5	24	4	5	4	4	5	22	5	5	4	5	5	24	5	5	4	14	3	5	5	13	5
2	2	2	2	2	5	5	5	5	5	25	5	5	5	4	5	24	5	5	5	5	4	24	5	5	5	15	4	4	5	13	5
2	2	2	2	2	5	5	5	5	3	23	4	4	3	4	3	18	4	4	4	4	5	21	5	4	4	13	3	4	4	11	4
2	2	2	2	2	5	5	5	5	3	23	4	4	3	4	3	18	4	4	4	4	5	21	5	4	4	13	3	4	4	11	4
2	2	2	2	2	5	5	5	4	3	22	4	5	3	2	3	17	5	4	5	2	2	18	5	2	4	11	1	4	3	8	5
2	2	2	2	2	5	5	5	4	3	22	5	3	2	3	2	15	5	4	5	3	2	19	5	2	4	11	1	4	3	8	5
2	2	2	2	2	4	5	3	5	4	21	4	5	5	4	4	22	4	5	3	5	3	20	5	5	5	15	5	4	4	13	5
2	2	2	2	2	2	5	5	2	4	18	3	4	5	2	2	16	4	4	3	4	3	18	4	4	5	13	4	3	5	12	5
2	2	2	2	2	3	5	5	2	4	19	3	5	4	1	2	15	5	5	3	4	5	22	3	3	4	10	3	5	5	13	5
2	2	2	2	2	5	5	4	5	5	24	4	5	4	4	5	22	5	5	5	5	5	25	5	5	4	14	3	5	5	13	5
2	2	2	2	2	5	5	4	5	5	24	4	5	4	4	5	22	5	5	4	4	5	23	5	5	4	14	3	5	5	13	5
2	2	2	2	2	5	5	4	5	5	24	4	5	4	4	5	22	5	5	4	5	5	24	5	5	4	14	3	5	5	13	5
2	2	2	2	2	5	5	4	5	5	24	4	5	4	5	4	22	5	5	5	5	5	25	5	5	4	14	3	5	5	13	5
2	2	2	2	2	5	5	4	5	5	24	4	5	4	4	5	22	5	5	5	5	5	25	5	5	4	14	3	5	5	13	5
2	2	2	2	2	5	5	4	5	5	24	4	5	4	4	5	22	5	5	4	5	5	24	5	5	4	14	3	5	5	13	5
2	2	2	2	2	4	5	3	5	4	21	4	5	5	4	4	22	4	5	5	3	3	20	5	5	5	15	5	4	4	13	5
2	2	2	2	2	5	5	4	5	5	24	4	5	4	4	5	22	5	5	4	4	5	23	5	5	4	14	3	5	5	13	5
2	2	2	2	2	4	5	5	4	5	23	5	4	3	5	3	20	3	5	5	5	4	22	5	5	4	14	5	3	5	13	4
2	2	2	2	2	5	5	4	5	5	24	4	5	4	4	5	22	5	5	4	4	5	23	5	5	4	14	5	5	5	15	5
2	2	2	2	2	5	5	4	5	5	24	4	5	4	4	5	22	5	5	4	5	5	24	5	5	4	14	3	5	5	13	5
2	2	2	2	2	4	5	5	5	5	24	4	5	5	4	4	22	5	5	4	4	5	23	5	5	5	15	4	4	5	13	5
2	2	2	2	2	5	5	5	4	3	22	4	5	3	5	3	20	3	4	5	5	5	22	5	4	3	12	4	5	3	12	3
2	2	2	2	2	5	5	5	4	3	22	5	3	5	3	5	21	5	4	5	5	5	24	5	4	3	12	5	3	3	11	3
2	2	2	2	2	4	5	4	3	4	20	5	5	4	3	4	21	5	5	4	5	4	23	5	3	5	13	4	5	3	12	5
2	2	2	2	2	4	4	4	5	4	21	3	5	5	3	5	21	5	5	4	5	3	22	4	3	4	11	3	4	2	9	5
2	2	2	2	2	4	5	4	3	4	20	5	5	4	3	4	21	5	5	4	4	4	22	5	4	5	14	4	4	4	12	3
2	2	2	2	2	5	5	5	5	5	25	5	5	5	5	5	25	5	5	5	5	5	25	5	5	5	15	5	5	5	15	5
2	2	2	2	2	4	4	4	4	4	20	4	4	4	4	4	20	4	4	4	4	5	21	4	5	5	14	4	4	3	11	3
2	2	2	2	2	5	5	5	4	4	23	4	5	4	4	5	22	4	4	4	4	4	20	5	5	4	14	4	4	5	13	5
2	2	2	2	2	4	4	5	5	5	23	4	4	5	5	5	23	5	5	5	5	5	25	4	5	4	13	4	5	5	14	4
2	2	2	2	2	5	5	5	5	4	24	4	5	4	3	3	19	3	3	3	3	4	16	4	4	4	12	5	4	4	13	3
2	2	2	2	2	5	5	5	5	5	25	5	5	5	5	5	25	5	5	5	5	5	25	5	5	5	15	5	5	5	15	5
2	2	2	2	2	5	4	5	3	3	20	4	5	4	2	4	19	5	4	3	5	2	19	5	5	5	15	2	3	2	7	5
2	2	2	2	2	5	4	5	3	3	20	4	5	4	2	4	19	5	4	3	5	2	19	5	5	5	15	2	3	2	7	5
2	2	2	2	2	4	5	4	4	5	22	5	5	3	3	4	20	4	5	3	4	3	19	4	4	4	12	2	4	2	8	5
2	2	2	2	2	1	4	3	1	2	11	2	2	2	2	3	11	3	3	4	5	5	20	5	4	3	12	4	5	3	12	4
2	2	2	2	2	5	5	5	4	5	24	4	5	3	2	3	17	2	4	5	2	2	15	5	2	4	11	1	4	3	8	5
2	2	2	2	2	5	5	5	4	5	24	4	5	3	2	3	17	5	4	5	2	2	18	5	3	4	12	1	4	3	8	5
2	2	2	2	2	5	5	5	4	5	24	4	5	3	2	3	17	5	5	5	2	2	19	5	2	5	12	1	4	3	8	5
2	2	2	2	2	1	4	3	1	1	10	1	1	1	1	3	7	1	1	4	5	3	14	5	5	3	13	5	5	3	13	4
2	2	2	2	2	5	5	5	4	5	24	5	5	5	3	3	21	5	5	3	5	1	19	5	5	5	15	5	5	5	15	5
2	2	2	2	2	5	5	5	5	5	25	5	5	5	5	5	25	5	5	5	5	5	25	5	5	5	15	5	5	5	15	5
2	2	2	2	2	5	5	4	4	5	23	5	4	4	3	3	19	5	4	4	5	1	19	5	5	5	15	4	4	4	12	5
2	2	2	2	2	4	4	4	4	4	20	4	4	4	4	4	20	4	4	4	4	5	21	5	5	5	15	5	5	5	15	5
2	2	2	2	2	4	5	4	4	5	22	5	5	3	3	4	20	4	5	3	4	3	19	4	4	4	12	2	4	2	8	5
2	2	2	2	2	4	5	5	3	4	21	4	4	4	3	5	20	5	5	5	5	4	24	5	3	5	13	5	4	3	12	5
2	2	2	2	2	4	5	5	3	4	21	4	4	4	3	5	20	5	5	5	5	4	24	5	3	5	13	5	4	3	12	5
2	2	2	2	2	4	4	4	5	4	21	3	5	5	2	3	18	5	5	4	5	3	22	4	3	4	11	3	4	2	9	3
2	2	2	2	2	4	5	4	3	4	20	4	3	4	3	4	18	5	4	4	5	5	23	2	3	4	9	3	5	3	11	5
2	2	2	2	2	4	5	4	3	4	20	4	3	4	3	4	18	5	4	4	5	5	23	2	3	4	9	3	5	3	11	5
2	2	2	2	2	5	5	5	4	5	24	4	5	3	2	3	17	5	4	5	2	2	18	5	2	4	11	1	4	3	8	5
2	2	2	2	2	4	4	4	4	4	20	4	4	4	4	4	20	4	4	4	4	4	20	4	4	4	12	4	4	4	12	4
2	2	2	2	2	5	5	5	4	4	23	4	5	3	5	5	22	3	3	4	4	3	17	4	4	5	13	5	4	3	12	5
2	2	3	2	2	5	5	5	5	5	25	4	5	4	5	5	23	3	3	4	4	3	17	4	4	5	13	5	4	3	12	5
2	2	3	3	3	5	5	5	4	5	24	5	3	3	2	3	16	5	4	5	2	2	18	5	2	4	11	1	4	3	8	5
2	2	3	3	3	5	5	5	4	5	24	5	4	3	2	3	17	5	4	5	2	2	18	5	2	4	11	1	4	3	8	5
2	2	3	3	3	4	5	3	5	4	21	4	4	5	4	4	21	4	5	4	5	5	23	4	4	4	12	5	4	4	13	5
2	2	3	3	3	4	5	4	3	4	20	5	5	4	3	4	21	5	5	4	5	4	23	5	3	5	13	5	3	3	11	5
2	2	3	3	3	3	4	4	2	3	16	3	5	5	2	1	16	5	4	4	4	3	20	5	3	5	13	4	3	3	10	5
2	2	3	3	3	1	3	1	3	1	9	1	4	1	1	3	10	1	1	4	5	4	15	1	1	4	6	4	4	4	12	4
2	2	3	3	3	2	5	3	1	3	14	4	5	1	2	2	14	5	5	4	5	2	21	5	2	4	11	4	4	4	12	5
2	2	3	3	3	5	5	5	4	5	24	5	5	5	3	3	21	5	5	2	3	1	16	5	5	5	15	5	5	5	15	5
2	2	3	3	3	2	5	3	1	3	14	4	5	1	2	2	14	5	5	4	5	2	21	5	2	4	11	4	4	2	10	5
2	2	3	3	3	2	5	3	1	3	14	4	5	1	2	2	14	4	4	5	5	2	20	5	4	4	13	4	4	4	12	4
2	2	3	3	3	4	4	4	4	4	20	4	4	4	4	4	20	4	4	4	4	4	20	4	4	4	12	4	4	4	12	4
2	2	3	3	3	5	5	5	4	5	24	4	5	3	2	3	17	5	4	5	2	2	18	5	2	4	11	1	4	3	8	5
2	2	3	3	3	4	5	4	5	4	22	4	5	4	4	5	22	5	5	4	4	4	22	5	4	4	13	4	5	4	13	5
2	2	3	3	3	5	5	5	5	5	25	5	5	5	5	5	25	5	4	5	4	5	23	4	5	4	13	4	5	4	13	5
2	2	3	3	3	5	5	5	5	5	25	5	5	5	5	5	25	5	5	5	5	5	25	5	5	5	15	5	5	5	15	5
2	2	3	3	3	4	5	5	4	5	23	4	4	4	5	4	21	5	5	4	5	4	23	4	5	4	13	5	5	5	15	4
2	2	3	3	3	4	5	4	5	4	22	4	3	2	2	2	13	5	4	4	4	5	22	4	4	4	12	3	3	3	9	4
2	2	3	3	3	4	4	4	4	4	20	4	5	4	4	4	21	4	4	4	4	4	20	4	4	4	12	4	4	4	12	4
2	2	3	3	3	4	4	4	4	4	20	4	5	4	4	3	20	4	4	4	4	4	20	5	4	5	14	4	4	3	11	4
2	2	3	3	3	4	4	4	4	4	20	4	4	4	4	4	20	4	4	4	4	4	20	4	4	5	13	5	5	5	15	4
2	2	3	3	3	4	4	4	4	4	20	4	4	4	4	4	20	4	4	4	4	4	20	4	4	4	12	4	4	4	12	4
2	2	3	3	3	4	4	4	4	4	20	4	4	4	4	4	20	4	4	4	4	4	20	4	4	4	12	4	4	4	12	4
2	2	3	3	3	4	4	4	4	4	20	4	4	4	4	4	20	4	4	4	4	4	20	4	4	4	12	4	4	4	12	4
2	2	3	3	3	4	4	4	4	4	20	4	5	4	4	4	21	4	4	4	4	4	20	4	4	4	12	4	4	4	12	5
2	2	3	3	3	1	5	2	2	3	13	3	3	3	4	2	15	3	4	4	3	3	17	4	2	3	9	4	5	4	13	3
2	2	3	3	3	4	5	4	3	4	20	4	4	4	4	3	19	4	4	5	4	4	21	4	4	4	12	4	4	4	12	4
2	2	3	3	3	4	4	5	5	4	22	5	5	4	4	4	22	5	5	3	4	2	19	4	3	5	12	4	5	4	13	5
2	2	3	3	3	4	5	5	4	4	22	4	4	4	4	3	19	4	4	4	4	4	20	4	4	4	12	4	4	4	12	4
2	2	3	3	3	4	4	4	4	4	20	4	4	4	4	4	20	4	4	4	4	4	20	4	4	4	12	4	4	4	12	4
2	2	3	3	3	4	4	4	4	5	21	4	4	4	5	4	21	4	4	4	4	4	20	4	4	4	12	4	4	4	12	4
2	2	3	3	3	4	5	5	5	5	24	4	5	4	4	4	21	5	5	4	4	5	23	5	4	5	14	5	5	4	14	5
2	2	3	3	3	4	5	5	5	5	24	5	4	5	4	5	23	4	5	5	4	4	22	4	4	3	11	3	4	3	10	4
2	2	3	3	3	4	5	5	5	5	24	4	5	4	4	4	21	5	5	4	4	5	23	5	4	5	14	5	5	4	14	5
2	2	3	3	3	5	5	5	5	4	24	5	5	5	5	5	25	5	5	5	5	5	25	5	4	5	14	4	5	4	13	5
2	2	3	3	3	4	5	4	5	4	22	4	5	4	4	5	22	5	5	4	4	4	22	5	4	4	13	4	5	4	13	5
2	2	3	3	3	4	5	4	5	4	22	4	5	4	4	5	22	5	5	4	4	4	22	5	4	4	13	4	5	4	13	5
2	2	3	3	3	5	5	5	5	5	25	5	5	5	5	5	25	5	5	5	5	5	25	5	5	5	15	5	5	5	15	5
2	2	3	3	3	5	5	5	5	5	25	5	5	4	4	4	22	4	4	5	5	5	23	5	4	5	14	5	5	5	15	5
2	2	3	3	3	4	5	5	4	4	22	4	3	4	4	5	20	4	3	3	4	4	18	5	5	5	15	4	3	3	10	4
2	2	3	3	3	5	5	5	5	4	24	5	5	5	4	4	23	5	5	4	5	4	23	4	5	5	14	4	4	4	12	4
2	2	3	3	3	4	5	4	5	3	21	5	3	4	4	3	19	5	4	4	4	5	22	4	5	5	14	5	3	4	12	3
2	2	3	3	3	4	4	5	5	4	22	4	4	4	4	4	20	4	4	4	4	4	20	4	4	4	12	4	5	4	13	4
2	2	3	3	3	4	4	4	5	4	21	4	5	4	4	4	21	4	4	4	4	4	20	4	4	4	12	4	4	3	11	4
2	2	3	3	3	5	5	5	5	4	24	5	5	5	5	5	25	4	4	3	3	1	15	5	2	5	12	3	5	3	11	5
2	2	3	3	3	5	4	4	5	4	22	4	4	4	4	4	20	4	4	4	4	3	19	3	3	3	9	3	3	3	9	4
2	2	3	3	3	4	4	4	4	5	21	5	5	5	4	4	23	5	5	5	5	4	24	5	4	4	13	4	4	4	12	4
2	2	3	3	3	5	5	5	5	5	25	5	5	5	5	5	25	5	5	5	5	5	25	5	5	5	15	5	5	5	15	5
2	2	3	3	3	4	4	4	4	4	20	5	5	4	4	4	22	4	4	4	4	4	20	4	4	4	12	4	4	4	12	4
2	2	3	3	3	4	4	4	4	4	20	4	4	4	4	4	20	4	4	4	4	4	20	4	4	4	12	4	4	4	12	4
2	2	3	3	3	4	5	5	5	5	24	4	5	4	4	4	21	5	5	4	4	5	23	5	4	5	14	5	5	4	14	5
2	2	3	3	3	4	4	4	4	4	20	4	5	4	4	4	21	4	4	4	4	4	20	4	4	4	12	4	4	3	11	4
2	2	3	3	3	4	5	5	4	4	22	4	3	4	4	3	18	4	3	3	4	4	18	5	5	5	15	4	3	3	10	4
2	2	3	3	3	4	4	5	5	4	22	5	5	4	4	4	22	5	5	3	4	2	19	4	3	5	12	4	5	4	13	5
2	2	3	3	3	4	5	5	4	4	22	4	4	4	4	3	19	4	4	4	4	4	20	4	4	4	12	4	4	4	12	4
2	2	3	3	3	4	5	4	3	4	20	4	4	4	4	3	19	4	4	5	4	4	21	4	4	4	12	4	4	4	12	4
2	2	3	3	3	4	4	4	4	4	20	4	4	4	4	4	20	4	4	4	4	4	20	4	4	4	12	4	4	4	12	4
2	2	3	3	3	5	4	5	5	4	23	4	5	4	3	4	20	3	4	4	4	3	18	5	4	3	12	4	5	3	12	4
2	2	3	3	3	5	5	5	5	5	25	5	5	5	5	5	25	5	5	5	5	5	25	5	5	5	15	5	5	5	15	5
2	2	3	3	3	4	4	4	4	4	20	4	4	4	4	4	20	4	4	4	4	4	20	4	4	4	12	4	4	4	12	4
2	2	3	3	3	4	5	3	4	4	20	5	3	4	3	4	19	5	4	4	3	5	21	4	3	5	12	4	4	3	11	4
2	2	3	3	3	4	4	4	4	4	20	4	4	4	4	4	20	4	4	4	4	4	20	4	4	4	12	4	4	4	12	4
2	2	3	3	3	5	5	5	5	5	25	5	5	5	5	5	25	5	5	5	5	5	25	5	5	5	15	5	5	5	15	5
2	2	3	3	3	4	4	4	4	4	20	4	4	4	4	4	20	4	4	4	4	4	20	4	4	4	12	4	4	4	12	4
2	2	3	3	3	5	4	4	5	5	23	5	4	5	4	4	22	5	5	5	5	4	24	4	4	4	12	4	4	4	12	5
2	2	3	3	3	4	5	5	3	4	21	5	4	3	4	5	21	5	4	2	4	5	20	3	4	5	12	3	4	5	12	3
2	2	3	3	3	4	5	5	3	4	21	5	4	3	4	5	21	5	4	2	4	5	20	3	4	5	12	3	4	5	12	3
2	2	3	3	3	4	5	5	3	4	21	5	4	3	4	5	21	5	4	2	4	5	20	3	4	5	12	3	4	5	12	3
2	2	3	3	3	4	4	5	3	3	19	4	4	4	4	4	20	4	3	3	4	4	18	5	3	3	11	3	3	3	9	3
2	2	3	3	3	4	5	5	3	4	21	5	4	3	4	5	21	5	4	2	4	5	20	3	4	5	12	3	4	3	10	3
2	2	3	3	3	4	5	5	3	4	21	4	3	3	5	5	20	4	4	4	4	4	20	5	5	4	14	3	3	4	10	4
2	2	3	3	3	3	3	3	3	3	15	3	3	3	3	3	15	3	3	3	3	3	15	3	3	3	9	3	3	3	9	3
2	2	3	3	3	4	4	4	4	4	20	4	4	4	4	4	20	4	4	4	4	4	20	4	4	4	12	4	4	4	12	4
2	2	3	3	3	4	4	4	4	4	20	4	4	4	4	4	20	4	4	4	4	4	20	4	4	4	12	4	4	4	12	4
2	2	3	3	3	4	4	4	4	4	20	4	4	4	4	4	20	4	4	4	4	4	20	4	4	4	12	4	4	4	12	4
2	2	3	3	3	5	5	5	5	5	25	5	5	5	5	5	25	5	5	5	5	5	25	5	5	5	15	5	5	5	15	5
2	2	3	3	3	2	5	5	3	5	20	5	5	5	5	4	24	4	4	5	4	4	21	5	5	5	15	5	4	4	13	4
2	2	3	3	3	4	5	4	5	4	22	4	4	4	4	5	21	4	4	4	4	4	20	4	5	5	14	4	4	5	13	3
2	2	3	3	3	4	5	4	3	5	21	4	5	5	5	4	23	4	5	4	5	4	22	3	4	5	12	4	5	4	13	5
2	2	3	3	3	4	5	3	5	4	21	3	4	5	5	4	21	5	4	2	1	2	14	5	4	3	12	5	4	4	13	3
2	2	3	3	3	4	5	3	4	3	19	5	4	4	5	5	23	3	3	4	4	4	18	4	4	4	12	5	5	5	15	5
2	2	3	3	3	4	4	5	4	3	20	4	3	5	4	5	21	4	5	4	4	4	21	4	4	5	13	4	5	4	13	5
2	2	3	3	3	4	4	5	4	3	20	4	3	5	4	5	21	4	5	4	4	4	21	4	4	5	13	4	5	4	13	5
2	2	3	3	3	4	5	3	4	3	19	5	4	4	5	5	23	3	3	4	4	4	18	4	4	4	12	5	5	5	15	5
2	2	3	3	3	4	5	3	5	4	21	3	4	5	5	4	21	5	4	2	1	2	14	5	4	3	12	5	4	4	13	3
2	2	3	3	3	4	5	4	3	5	21	4	5	5	5	4	23	4	5	4	5	4	22	3	4	5	12	4	5	4	13	5
2	2	3	3	3	4	5	4	5	4	22	4	4	4	4	5	21	4	4	4	4	4	20	4	5	5	14	4	4	5	13	3
2	2	3	3	3	2	5	5	3	5	20	5	5	5	5	4	24	4	4	5	4	4	21	5	5	5	15	5	4	4	13	4
2	2	3	3	3	1	4	3	2	4	14	4	5	3	4	5	21	4	5	4	4	4	21	5	3	2	10	5	4	4	13	5
2	2	3	3	3	4	5	5	4	3	21	3	4	4	4	3	18	5	5	4	4	4	22	5	3	3	11	3	5	4	12	4
2	2	3	3	3	3	5	4	3	4	19	5	5	5	4	4	23	4	4	4	4	4	20	3	4	5	12	3	3	3	9	5
2	2	3	3	3	5	4	5	3	3	20	5	5	4	5	5	24	4	4	3	3	5	19	4	4	4	12	4	4	5	13	5
2	2	3	3	3	4	5	5	3	4	21	4	5	4	3	5	21	4	4	3	3	2	16	4	5	4	13	3	5	4	12	3
2	2	3	3	3	4	4	4	4	4	20	4	4	4	5	5	22	5	5	4	4	5	23	5	5	5	15	5	5	5	15	5
2	2	3	3	3	5	5	5	5	5	25	4	4	4	4	5	21	4	4	4	4	5	21	5	5	5	15	5	4	4	13	4
2	2	3	3	3	5	4	2	2	3	16	5	3	4	5	4	21	4	5	5	5	4	23	4	4	4	12	4	4	4	12	4
2	2	3	3	3	4	4	4	4	4	20	4	4	4	4	4	20	4	4	4	4	4	20	4	4	4	12	4	4	4	12	4
2	2	3	3	3	4	4	4	4	4	20	4	4	4	4	4	20	4	4	4	4	4	20	4	4	4	12	4	4	4	12	4
2	2	3	3	3	4	4	4	4	4	20	5	5	5	5	5	25	4	4	5	5	5	23	5	4	4	13	4	4	4	12	4
2	2	3	3	3	5	5	5	5	5	25	5	5	5	5	4	24	4	4	5	5	5	23	5	5	5	15	5	5	5	15	5
2	2	3	3	3	5	5	5	5	5	25	5	5	5	5	5	25	5	5	5	5	5	25	5	5	5	15	5	5	5	15	5
2	3	4	3	3	4	4	4	4	4	20	4	4	4	4	4	20	4	4	4	4	4	20	4	4	4	12	4	4	4	12	4
2	3	4	3	3	4	4	2	2	2	14	4	2	2	4	2	14	4	2	4	2	4	16	2	2	4	8	2	2	4	8	4
2	3	4	3	3	4	4	4	4	4	20	2	4	2	4	2	14	4	2	2	2	2	12	2	4	4	10	3	4	3	10	2
2	3	4	3	3	4	4	3	2	3	16	4	4	4	4	4	20	4	2	4	4	4	18	4	4	4	12	4	4	4	12	2
2	3	4	3	3	4	4	4	4	3	19	3	4	3	4	3	17	3	4	2	2	4	15	4	4	4	12	4	4	4	12	4
2	3	4	4	3	4	4	4	4	3	19	3	4	3	4	3	17	3	3	4	4	2	16	2	4	4	10	4	4	4	12	2
2	3	4	4	3	4	4	4	4	2	18	4	2	2	2	2	12	2	2	2	2	4	12	2	2	4	8	2	4	2	8	4
2	3	4	4	3	4	4	4	2	4	18	4	2	4	2	4	16	4	2	4	4	4	18	2	4	2	8	2	4	2	8	2
2	3	4	4	3	4	2	4	4	2	16	3	4	2	3	2	14	4	2	2	2	2	12	2	4	2	8	3	2	4	9	4
2	3	4	4	3	4	2	4	2	2	14	2	4	2	4	2	14	2	2	4	2	4	14	2	2	4	8	2	2	2	6	2
2	3	4	4	3	4	4	4	4	2	18	4	2	4	2	4	16	4	2	4	4	4	18	2	2	4	8	2	4	2	8	4
2	3	4	4	3	4	4	4	4	2	18	4	2	2	4	2	14	2	4	4	2	2	14	2	2	4	8	3	3	3	9	2
2	3	4	4	3	4	4	4	2	2	16	2	4	2	4	2	14	4	2	4	2	4	16	4	4	2	10	4	2	4	10	2
2	3	4	4	3	4	2	4	4	4	18	2	4	2	4	2	14	2	2	4	4	2	14	2	2	4	8	2	4	2	8	4
2	3	4	4	3	4	2	2	2	2	12	2	4	2	4	2	14	4	2	2	2	4	14	4	4	2	10	4	4	4	12	2
2	3	4	4	3	2	2	3	4	3	14	4	2	3	3	4	16	4	4	3	4	3	18	4	4	4	12	4	2	2	8	4
2	3	4	4	3	4	2	4	4	2	16	2	2	4	4	4	16	4	2	2	2	4	14	4	3	3	10	4	2	2	8	4
2	3	4	4	3	4	4	3	3	4	18	4	4	4	2	4	18	4	2	4	4	4	18	4	2	4	10	2	3	4	9	3
2	3	4	4	3	4	4	2	2	4	16	4	3	4	4	2	17	4	4	4	4	4	20	4	2	4	10	3	2	3	8	3
2	3	4	4	3	4	4	2	2	4	16	2	2	2	2	2	10	4	2	2	2	2	12	2	2	4	8	2	2	2	6	2
2	3	4	4	3	4	4	4	4	4	20	4	4	4	4	4	20	4	4	4	4	4	20	4	4	4	12	4	4	4	12	4
2	3	4	4	3	4	4	4	4	2	18	2	4	2	2	2	12	4	2	4	4	2	16	2	2	2	6	4	2	2	8	4
2	3	4	4	3	2	2	2	2	4	12	4	4	4	4	4	20	2	4	2	2	4	14	4	4	4	12	2	4	4	10	2
2	3	4	4	3	4	2	2	4	2	14	2	4	2	4	2	14	2	4	4	2	2	14	2	2	2	6	3	4	2	9	2
2	3	4	4	3	2	2	2	2	4	12	2	2	2	2	2	10	2	2	2	2	2	10	2	2	2	6	2	4	2	8	2
2	3	4	4	3	4	2	2	2	4	14	4	2	2	2	4	14	2	2	4	2	2	12	4	2	2	8	2	4	2	8	2
2	3	4	4	3	4	4	2	4	4	18	4	4	4	4	4	20	4	4	4	4	4	20	4	4	4	12	4	4	4	12	4
2	3	4	4	3	4	4	4	4	4	20	4	2	4	4	4	18	4	4	4	4	4	20	4	4	4	12	4	2	4	10	4
2	3	4	4	3	4	2	4	4	4	18	4	2	4	4	2	16	4	4	4	2	4	18	4	4	4	12	4	4	2	10	4
2	3	4	4	3	4	2	4	4	4	18	4	2	4	4	4	18	4	4	4	4	2	18	4	4	4	12	4	4	2	10	4
2	3	4	4	4	2	2	2	2	2	10	2	2	2	2	4	12	2	2	2	4	2	12	4	2	2	8	2	4	2	8	4
2	3	4	4	4	4	3	2	4	2	15	4	3	2	4	3	16	4	4	2	2	4	16	4	4	4	12	4	4	4	12	4
2	3	4	4	4	4	3	2	4	4	17	4	4	4	4	4	20	4	4	4	4	2	18	2	2	2	6	2	2	4	8	4
2	3	4	4	4	2	2	2	2	2	10	2	2	2	2	2	10	2	2	2	2	2	10	2	2	2	6	2	2	2	6	2
2	3	4	4	4	4	4	4	4	4	20	4	2	4	4	4	18	4	4	4	4	4	20	4	4	4	12	4	4	4	12	2
2	3	4	4	4	3	4	2	4	2	15	2	2	2	4	3	13	3	4	4	4	2	17	2	2	4	8	4	3	2	9	4
2	3	4	4	4	4	2	2	2	2	12	3	3	3	3	2	14	2	2	2	2	4	12	4	4	4	12	2	2	4	8	4
2	3	4	4	4	4	4	4	4	4	20	4	4	4	4	4	20	4	4	4	4	4	20	4	4	4	12	4	4	4	12	4
2	3	4	4	4	4	4	4	4	4	20	3	3	3	4	3	16	4	4	4	4	4	20	2	4	4	10	4	4	4	12	4
2	3	4	4	4	2	2	2	4	2	12	2	4	2	2	4	14	2	2	2	2	4	12	2	2	2	6	4	2	2	8	4
2	3	4	4	4	2	2	2	4	2	12	2	4	2	2	4	14	2	4	2	2	2	12	4	2	2	8	4	2	2	8	2
2	3	4	4	4	4	4	4	4	4	20	4	4	4	4	4	20	4	4	4	4	4	20	4	4	4	12	4	4	4	12	4
2	3	4	4	4	4	2	3	3	3	15	2	2	3	2	3	12	3	3	2	2	4	14	4	4	2	10	2	3	3	8	2
2	3	4	4	4	2	3	3	2	4	14	2	4	2	4	4	16	4	4	4	4	4	20	3	4	4	11	3	2	4	9	2
2	3	4	4	4	4	3	3	3	3	16	2	2	3	2	3	12	3	3	4	4	2	16	3	3	3	9	3	2	2	7	2
2	3	4	4	4	3	3	3	2	2	13	2	2	3	3	3	13	4	4	4	4	3	19	3	3	2	8	4	4	2	10	2
2	3	4	4	4	4	4	4	4	4	20	4	4	4	4	4	20	4	4	4	4	4	20	4	4	4	12	4	4	4	12	4
2	3	4	4	4	4	4	4	4	4	20	4	4	4	4	4	20	3	3	2	3	2	13	3	3	3	9	3	3	2	8	3
2	3	4	4	4	4	2	3	3	3	15	3	2	2	2	2	11	3	3	2	2	2	12	3	3	3	9	3	3	2	8	2
2	3	4	4	4	4	4	4	4	4	20	4	4	4	4	4	20	4	4	4	4	4	20	4	4	4	12	4	4	4	12	4
2	3	4	4	4	2	2	2	2	2	10	2	2	2	2	2	10	2	2	2	2	2	10	2	2	2	6	2	2	2	6	2
2	3	4	4	4	4	2	2	2	2	12	2	2	2	2	2	10	3	3	2	3	3	14	3	3	3	9	3	2	2	7	3
2	3	4	4	4	4	2	2	2	2	12	2	3	3	2	2	12	2	1	1	2	1	7	1	1	2	4	2	3	2	7	1
2	3	4	4	4	2	2	2	4	4	14	4	4	2	2	2	14	2	2	2	2	2	10	2	2	2	6	2	2	2	6	2
2	3	4	4	4	2	2	2	2	2	10	2	2	2	2	2	10	2	2	2	2	2	10	2	2	2	6	2	2	2	6	2
2	3	4	4	4	4	4	4	4	4	20	4	4	4	4	4	20	4	4	4	4	4	20	4	4	4	12	4	4	4	12	4
2	3	4	4	4	2	2	2	2	2	10	2	2	2	2	2	10	2	2	2	2	2	10	2	2	2	6	2	2	2	6	2
2	3	4	4	4	4	2	3	3	3	15	2	2	2	2	2	10	3	3	4	2	4	16	2	2	2	6	2	2	2	6	2
2	3	4	4	4	2	2	2	2	2	10	3	3	3	3	3	15	3	2	2	3	3	13	3	3	3	9	3	3	3	9	3
2	3	4	4	4	2	2	2	2	2	10	2	2	2	2	2	10	2	2	2	2	2	10	2	2	2	6	2	2	2	6	2
2	3	4	4	4	4	4	4	2	2	16	4	2	4	2	3	15	4	2	4	2	2	14	2	2	4	8	4	2	2	8	2
2	3	4	4	4	2	2	4	4	3	15	3	4	3	3	3	16	2	4	3	4	4	17	3	2	2	7	2	4	4	10	2
2	3	4	4	4	4	4	4	4	2	18	4	4	4	2	4	18	4	4	4	4	4	20	4	4	4	12	4	4	4	12	2
2	3	4	4	4	4	2	2	4	2	14	2	4	2	4	2	14	2	4	4	2	2	14	2	2	2	6	3	4	2	9	2
2	3	4	4	4	4	4	4	4	4	20	4	4	4	4	4	20	4	4	4	4	4	20	4	4	4	12	4	4	4	12	4
2	3	4	4	4	4	4	3	4	4	19	4	4	3	3	4	18	4	4	2	2	4	16	4	2	2	8	2	2	3	7	3
2	3	4	4	4	4	4	4	4	4	20	4	4	4	4	4	20	4	2	4	2	4	16	2	4	2	8	2	4	2	8	4
2	3	4	4	4	4	4	4	4	4	20	4	4	2	4	4	18	4	4	4	4	4	20	4	4	4	12	4	4	4	12	4
2	3	4	4	4	4	4	2	2	4	16	4	4	2	2	2	14	2	2	4	2	2	12	2	2	2	6	2	2	4	8	2
2	3	4	4	4	2	2	3	4	3	14	3	2	2	3	4	14	2	4	4	4	2	16	4	2	4	10	4	4	4	12	2
2	3	4	4	4	4	2	4	4	2	16	2	4	2	2	2	12	2	3	2	2	4	13	2	4	2	8	2	2	2	6	3
2	3	4	4	4	2	2	2	2	2	10	2	2	2	4	4	14	4	4	4	4	2	18	4	4	4	12	4	2	2	8	2
2	3	4	4	4	2	2	4	4	2	14	2	2	3	2	4	13	2	4	2	2	2	12	2	4	2	8	4	2	2	8	2
2	3	4	4	4	4	4	4	4	4	20	4	4	4	4	4	20	4	4	4	4	4	20	4	4	4	12	4	4	4	12	4
2	3	4	4	4	4	2	3	2	2	13	3	2	4	2	4	15	2	2	2	2	2	10	2	4	4	10	4	2	2	8	2

## Sheet: Sheet2
Demographic Variable	Category	Frequency
Gender	Male	188	470
	Female	282
Teaching Specialization	English as a Foreign Language (EFL)	235
	Arabic Language Teaching	160
	French Language Teaching	75
Teaching Level	Primary School	85
	Secondary School	210
	University/Higher Education	100
	Other (e.g., language institutes)	75
Teaching Experience	0-5 Years	165
	6-10 Years	130
	11-20 Years	105
	20+ Years	70
Highest Qualification	Bachelor's Degree	215
	Postgraduate Diploma	80
	Master's Degree	130
	Doctorate	45
