# Supplementary material
Source: Research Square preprint supplement (doi:10.21203/rs.3.rs-9540613/v1)
Supplement: Supplementary file 3 [file 42019f796f0c967210cd6e3b.xlsx]

## Sheet: Sheet1
CORRELATIONS
/VARIABLES=totalArabicLanguageAttitudes totalEnglishLanguageAttitudes totalFrenchLanguageAttitudes ReportedPractices
/PRINT=TWOTAIL NOSIG
/MISSING=PAIRWISE.
Correlations
Notes
Output Created		15-JUL-2025 17:04:57
Comments
Input	Active Dataset	DataSet1
	Filter	<none>
	Weight	<none>
	Split File	<none>
	N of Rows in Working Data File	470
Missing Value Handling	Definition of Missing	User-defined missing values are treated as missing.
	Cases Used	Statistics for each pair of variables are based on all the cases with valid data for that pair.
Syntax		CORRELATIONS /VARIABLES=totalArabicLanguageAttitudes totalEnglishLanguageAttitudes totalFrenchLanguageAttitudes ReportedPractices /PRINT=TWOTAIL NOSIG /MISSING=PAIRWISE.
Resources	Processor Time	00:00:00.03
	Elapsed Time	00:00:00.03
Correlations
		total Arabic Language Attitudes	total English Language Attitudes	total French Language Attitudes	Reported Practices
total Arabic Language Attitudes	Pearson Correlation	1	.799**	.784**	.753**
	Sig. (2-tailed)		1.5477e-105	6.04869e-99	5.86992e-87
	N	470	470	470	470
total English Language Attitudes	Pearson Correlation	.799**	1	.785**	.763**
	Sig. (2-tailed)	1.5477e-105		1.59082e-99	9.11819e-91
	N	470	470	470	470
total French Language Attitudes	Pearson Correlation	.784**	.785**	1	.789**
	Sig. (2-tailed)	6.04869e-99	1.59082e-99		4.64336e-101
	N	470	470	470	470
Reported Practices	Pearson Correlation	.753**	.763**	.789**	1
	Sig. (2-tailed)	5.86992e-87	9.11819e-91	4.64336e-101
	N	470	470	470	470
**. Correlation is significant at the 0.01 level (2-tailed).
REGRESSION
/MISSING LISTWISE
/STATISTICS COEFF OUTS R ANOVA
/CRITERIA=PIN(.05) POUT(.10)
/NOORIGIN
/DEPENDENT ReportedPractices
/METHOD=STEPWISE totalArabicLanguageAttitudes totalEnglishLanguageAttitudes totalFrenchLanguageAttitudes.
Regression
Notes
Output Created		15-JUL-2025 17:05:27
Comments
Input	Active Dataset	DataSet1
	Filter	<none>
	Weight	<none>
	Split File	<none>
	N of Rows in Working Data File	470
Missing Value Handling	Definition of Missing	User-defined missing values are treated as missing.
	Cases Used	Statistics are based on cases with no missing values for any variable used.
Syntax		REGRESSION /MISSING LISTWISE /STATISTICS COEFF OUTS R ANOVA /CRITERIA=PIN(.05) POUT(.10) /NOORIGIN /DEPENDENT ReportedPractices /METHOD=STEPWISE totalArabicLanguageAttitudes totalEnglishLanguageAttitudes totalFrenchLanguageAttitudes.
Resources	Processor Time	00:00:00.05
	Elapsed Time	00:00:00.06
	Memory Required	2684 bytes
	Additional Memory Required for Residual Plots	0 bytes
Variables Entered/Removeda
Model	Variables Entered	Variables Removed	Method
1	total French Language Attitudes		Stepwise (Criteria: Probability-of-F-to-enter <= .050, Probability-of-F-to-remove >= .100).
2	total English Language Attitudes		Stepwise (Criteria: Probability-of-F-to-enter <= .050, Probability-of-F-to-remove >= .100).
3	total Arabic Language Attitudes		Stepwise (Criteria: Probability-of-F-to-enter <= .050, Probability-of-F-to-remove >= .100).
a. Dependent Variable: Reported Practices
Model Summary
Model	R	R Square	Adjusted R Square	Std. Error of the Estimate
1	.789a	0.622503	0.621696	1.39996
2	.822b	0.676216	0.674829	1.29793
3	.831c	0.690571	0.688579	1.27019
a. Predictors: (Constant), total French Language Attitudes
b. Predictors: (Constant), total French Language Attitudes, total English Language Attitudes
c. Predictors: (Constant), total French Language Attitudes, total English Language Attitudes, total Arabic Language Attitudes
ANOVAa
Model		Sum of Squares	df	Mean Square	F	Sig.
1	Regression	1512.52	1	1512.52	771.744	.000b
	Residual	917.223	468	1.95988
	Total	2429.75	469
2	Regression	1643.03	2	821.516	487.659	.000c
	Residual	786.714	467	1.68461
	Total	2429.75	469
3	Regression	1677.91	3	559.304	346.666	.000d
	Residual	751.835	466	1.61338
	Total	2429.75	469
a. Dependent Variable: Reported Practices
b. Predictors: (Constant), total French Language Attitudes
c. Predictors: (Constant), total French Language Attitudes, total English Language Attitudes
d. Predictors: (Constant), total French Language Attitudes, total English Language Attitudes, total Arabic Language Attitudes
Coefficientsa
Model		Unstandardized Coefficients		Standardized Coefficients	t	Sig.
		B	Std. Error	Beta
1	(Constant)	2.46744	0.362948		6.79832	3.23656e-11
	total French Language Attitudes	0.483896	0.0174187	0.788988	27.7803	4.64336e-101
2	(Constant)	1.6633	0.348678		4.77031	2.46298e-06
	total French Language Attitudes	0.303574	0.0260867	0.494974	11.6371	1.16572e-27
	total English Language Attitudes	0.223388	0.0253799	0.374376	8.80179	2.63242e-17
3	(Constant)	1.25842	0.352162		3.57342	0.000389053
	total French Language Attitudes	0.248634	0.0281311	0.405396	8.83842	2.00032e-17
	total English Language Attitudes	0.160613	0.0282699	0.26917	5.68139	2.35648e-08
	total Arabic Language Attitudes	0.133852	0.028788	0.219658	4.64957	4.33776e-06
a. Dependent Variable: Reported Practices
Excluded Variablesa
Model		Beta In	t	Sig.	Partial Correlation	Collinearity Statistics
						Tolerance
1	total Arabic Language Attitudes	.348b	8.11317	4.39617e-15	0.351479	0.385425
	total English Language Attitudes	.374b	8.80179	2.63242e-17	0.37721	0.383234
2	total Arabic Language Attitudes	.220c	4.64957	4.33776e-06	0.210559	0.297513
a. Dependent Variable: Reported Practices
b. Predictors in the Model: (Constant), total French Language Attitudes
c. Predictors in the Model: (Constant), total French Language Attitudes, total English Language Attitudes
