# Supplementary material
Source: Research Square preprint supplement (doi:10.21203/rs.3.rs-9540613/v1)
Supplement: Supplementary file 4 [file 5388be77686422b3acc40aa9.xlsx]

## Sheet: Sheet1
T-TEST GROUPS=Gender(1 2)
/MISSING=ANALYSIS
/VARIABLES=totalArabicLanguageAttitudes totalEnglishLanguageAttitudes totalFrenchLanguageAttitudes @1.Howoftendoyoucorrectnonstandardformsinstudents’oralproducti @1.Howoftendoyouincorporatediscussionsoflinguisticvariatione.g.d
@1.Howoftendoyouusenonstandardlanguagevarietiesinyourteachingtoi ReportedPractices Correctingnonstandardlanguagefeaturesimprovesstudents’proficie Incorporatingdiverselanguagevarietiesinlessonsenhancesstudenteng
Teachingculturalcontextsalongsidelanguagevarietiesimproveslearni PerceivedEffectiveness @1.Howprepareddoyoufeeltohandlelinguisticvariationinyourclassroo
/CRITERIA=CI(.95).
T-Test
Notes
Output Created		15-JUL-2025 16:57:46
Comments
Input	Active Dataset	DataSet1
	Filter	<none>
	Weight	<none>
	Split File	<none>
	N of Rows in Working Data File	470
Missing Value Handling	Definition of Missing	User defined missing values are treated as missing.
	Cases Used	Statistics for each analysis are based on the cases with no missing or out-of-range data for any variable in the analysis.
Syntax		T-TEST GROUPS=Gender(1 2) /MISSING=ANALYSIS /VARIABLES=totalArabicLanguageAttitudes totalEnglishLanguageAttitudes totalFrenchLanguageAttitudes @1.Howoftendoyoucorrectnonstandardformsinstudents’oralproducti @1.Howoftendoyouincorporatediscussionsoflinguisticvariatione.g.d @1.Howoftendoyouusenonstandardlanguagevarietiesinyourteachingtoi ReportedPractices Correctingnonstandardlanguagefeaturesimproves…
Resources	Processor Time	00:00:00.03
	Elapsed Time	00:00:00.06
Group Statistics
Gender		N	Mean	Std. Deviation	Std. Error Mean
total Arabic Language Attitudes	male	188	21.8777	3.10441	0.226412
	female	282	20.234	3.97347	0.236617
total English Language Attitudes	male	188	21.4096	3.40608	0.248414
	female	282	19.3121	3.84696	0.229083
total French Language Attitudes	male	188	21.6968	3.08673	0.225123
	female	282	19.7092	3.88086	0.231102
1. How often do you correct non-standard forms in students’ oral production?	male	188	4.41489	0.729949	0.053237
	female	282	4.09574	1.02359	0.060954
1. How often do you incorporate discussions of linguistic variation (e.g., dialects, accents) into your lessons?	male	188	4.29787	0.77155	0.0562711
	female	282	3.85461	1.03848	0.0618403
1. How often do you use non-standard language varieties in your teaching to illustrate cultural or contextual differences?	male	188	4.35638	0.720674	0.0525605
	female	282	3.98582	0.880681	0.0524438
Reported Practices	male	188	13.0691	1.83563	0.133877
	female	282	11.9362	2.42676	0.144511
Correcting non-standard language features improves students’ proficiency in the standard variety.	male	188	4.37766	0.80169	0.0584692
	female	282	3.66667	1.07158	0.0638116
Incorporating diverse language varieties in lessons enhances student engagement.	male	188	4.28723	0.841724	0.061389
	female	282	4.01064	0.922182	0.0549152
Teaching cultural contexts alongside language varieties improves learning outcomes.	male	188	4.17553	0.893253	0.0651472
	female	282	3.7766	1.014	0.0603831
Perceived Effectiveness	male	188	12.8404	2.08536	0.152091
	female	282	11.4539	2.40396	0.143154
1. How prepared do you feel to handle linguistic variation in your classroom?	male	188	4.35638	0.798134	0.0582099
	female	282	4.06383	1.03815	0.0618211
Independent Samples Test
		Levene's Test for Equality of Variances		t-test for Equality of Means
		F	Sig.	t	df	Sig. (2-tailed)	Mean Difference	Std. Error Difference	95% Confidence Interval of the Difference
									Lower	Upper
total Arabic Language Attitudes	Equal variances assumed	20.6636	6.97916e-06	4.78112	468	2.33858e-06	1.64362	0.343772	0.968089	2.31915
	Equal variances not assumed			5.01883	456.309	7.46487e-07	1.64362	0.32749	1.00004	2.28719
total English Language Attitudes	Equal variances assumed	13.6445	0.000246964	6.05829	468	2.83036e-09	2.09752	0.346223	1.41717	2.77786
	Equal variances not assumed			6.20718	432.258	1.26582e-09	2.09752	0.337918	1.43335	2.76168
total French Language Attitudes	Equal variances assumed	13.3572	0.000286587	5.8888	468	7.43401e-09	1.98759	0.33752	1.32435	2.65083
	Equal variances not assumed			6.16064	453.583	1.5996e-09	1.98759	0.322627	1.35356	2.62162
1. How often do you correct non-standard forms in students’ oral production?	Equal variances assumed	11.017	0.000973267	3.69397	468	0.000246848	0.319149	0.0863973	0.149374	0.488924
	Equal variances not assumed			3.94355	465.866	9.26304e-05	0.319149	0.0809294	0.160117	0.478181
1. How often do you incorporate discussions of linguistic variation (e.g., dialects, accents) into your lessons?	Equal variances assumed	11.6857	0.000684873	5.00323	468	7.99161e-07	0.443262	0.0885953	0.269169	0.617356
	Equal variances not assumed			5.30154	462.507	1.78215e-07	0.443262	0.0836101	0.27896	0.607565
1. How often do you use non-standard language varieties in your teaching to illustrate cultural or contextual differences?	Equal variances assumed	0.233552	0.629128	4.79672	468	2.17161e-06	0.370567	0.0772544	0.218759	0.522376
	Equal variances not assumed			4.99085	448.717	8.61609e-07	0.370567	0.0742493	0.224648	0.516487
Reported Practices	Equal variances assumed	13.1032	0.000326943	5.44579	468	8.345e-08	1.13298	0.208047	0.724157	1.5418
	Equal variances not assumed			5.75135	460.553	1.61515e-08	1.13298	0.196994	0.745861	1.5201
Correcting non-standard language features improves students’ proficiency in the standard variety.	Equal variances assumed	16.6653	5.2434e-05	7.7627	468	5.27638e-14	0.710993	0.0915909	0.531013	0.890973
	Equal variances not assumed			8.21501	461.785	2.15175e-15	0.710993	0.0865481	0.540916	0.88107
Incorporating diverse language varieties in lessons enhances student engagement.	Equal variances assumed	0.385181	0.535146	3.29738	468	0.00105023	0.276596	0.0838836	0.111761	0.441431
	Equal variances not assumed			3.3581	424.941	0.000855525	0.276596	0.0823668	0.114699	0.438493
Teaching cultural contexts alongside language varieties improves learning outcomes.	Equal variances assumed	6.61724	0.0104069	4.37903	468	1.47202e-05	0.398936	0.0911015	0.219918	0.577955
	Equal variances not assumed			4.49115	433.433	9.09567e-06	0.398936	0.0888272	0.224351	0.573522
Perceived Effectiveness	Equal variances assumed	12.0891	0.000554475	6.45308	468	2.7418e-10	1.38652	0.214862	0.96431	1.80874
	Equal variances not assumed			6.63839	436.906	9.42588e-11	1.38652	0.208865	0.97602	1.79703
1. How prepared do you feel to handle linguistic variation in your classroom?	Equal variances assumed	12.7152	0.000400012	3.2722	468	0.00114605	0.292553	0.0894057	0.116867	0.468239
	Equal variances not assumed			3.44532	458.536	0.000622835	0.292553	0.0849132	0.125686	0.45942
