# Supplementary material
Source: Research Square preprint supplement (doi:10.21203/rs.3.rs-9540613/v1)
Supplement: Supplementary file 5 [file 5941c7e6c578f83ac8c30f82.docx]

**Dataset 1 Open-ended questions:**

Q2: What areas of professional development would help you better address linguistic diversity?

Participant 1 (English Teacher, 8 years exp.): "I really need more training on specific strategies for handling different English accents, especially those influenced by Arabic. Understanding the phonological differences and how to address them without alienating students would be beneficial. Also, resources on how to discuss 'World Englishes' and their validity would be great."

Participant 2 (Arabic Teacher, 4 years exp.): "Professional development on how to integrate colloquial Egyptian Arabic constructively into MSA lessons is crucial. I'm not sure when it's appropriate to code-switch or use dialectal examples to explain grammar points, and I need guidance on how to maintain formality while acknowledging students' everyday language."

Participant 3 (French Teacher, 15 years exp.): "I'd benefit from workshops on sociolinguistics related to French. Understanding the historical development of French dialects and how they influence learner pronunciation or grammar would be very helpful. I also want to learn how to discuss regional variations and the cultural nuances associated with them."

Participant 4 (English Teacher, 2 years exp.): "I feel very unprepared. More workshops on identifying common L1 interference errors and strategies for correcting them sensitively would be a priority. I also need resources on adapting materials to include diverse language varieties."

Participant 5 (Arabic Teacher, 12 years exp.): "I need guidance on how to assess students' proficiency in both MSA and dialect, and how to bridge the gap. Training on culturally sensitive ways to address dialectal use, rather than just marking it as incorrect, would be valuable."

Participant 6 (French Teacher, 7 years exp.): "Practical examples and lesson plans for teaching about French variation would be ideal. I also need to understand more about the sociolinguistic factors that influence learner attitudes towards standard vs. non-standard French."

Q1: Describe a specific instance where you addressed a non-standard language feature used by a student and how you handled it.

Participant 1 (English Teacher): "A student consistently used the 'th' sound as /t/ or /d/ (e.g., 'tink' for 'think'). Instead of just correcting it every time, I created a short, fun activity focusing on minimal pairs like 'thick' and 'tick'. I explained the difference clearly but also praised their overall fluency and effort, making the correction part of a larger learning process, not a sole focus."

Participant 2 (Arabic Teacher): "A student from Upper Egypt used a 'g' sound for the Arabic letter 'j' (e.g., 'ganna' instead of 'janna'). I gently corrected it, explaining that in MSA, we pronounce it more like a 'j' (as in 'judge'), but then I acknowledged that their dialectal pronunciation is perfectly understood in daily life. I framed it as learning a different register for formal contexts."

Participant 3 (French Teacher): "A student pronounced 'roi' (king) with a very strong guttural 'r' that sounded more like a German 'r'. I identified it as a pronunciation habit from their L1 (which wasn't French). I paired them with a stronger student for peer correction during a pronunciation drill, and later provided audio resources that modeled the standard Parisian 'r'."

Participant 4 (English Teacher): "A student used the Egyptian Arabic phrase 'ya gama'a' (meaning 'guys' or 'group') directly in an English sentence. I paused and asked, 'What did you mean by that?' and then explained that in English, we'd say 'everyone' or 'class'. I didn't make them repeat the whole sentence, but rather offered the correct English equivalent in context."

Participant 5 (Arabic Teacher): "A student used a common colloquial verb that isn't standard in MSA. I waited until after class and explained that while their word is correct and understood, for academic writing or formal speaking, MSA would use a different term (e.g., explaining the MSA equivalent of a colloquial verb). I provided them with a small list of such equivalents for common words."

Participant 6 (French Teacher): "A student struggled with verb conjugations, frequently defaulting to a more informal or regional pattern. I addressed it by first acknowledging their attempt and then demonstrating the standard conjugation, asking them to repeat it several times. I also provided a conjugation chart for them to practice with later."

Q2: What are the biggest challenges you face in teaching the standard variety of your target language, given the linguistic background of your students?

Participant 1 (English Teacher): "The biggest challenge is the sheer dominance of global English varieties, especially American English, in media and online. Students are exposed to so many accents and informal structures that trying to focus them on a more 'neutral' or formal standard can feel artificial. Also, many students have lower confidence in speaking if they don't sound 'native-like'."

Participant 2 (Arabic Teacher): "The biggest challenge is the disconnect between MSA and daily spoken Arabic. Students are fluent in their dialect but often find MSA intimidating or overly formal. They struggle to produce the sounds correctly or to use the complex grammar in spontaneous speech, making the transition from comprehension to production very difficult."

Participant 3 (French Teacher): "Many students arrive with a very strong French accent influenced by Arabic. Correcting these deeply ingrained pronunciation habits takes time and consistent effort. Also, the perception that 'standard' French is the only correct way to speak can sometimes discourage students who have regional accents or are learning it later in life."

Participant 4 (English Teacher): "The challenge is balancing encouragement with correction. I don't want to stifle their fluency by correcting every non-standard utterance, but I also need them to understand the expectations of formal language. Finding that balance is tricky, especially with large class sizes."

Participant 5 (Arabic Teacher): "Students often associate MSA with 'boring' or 'old-fashioned' language, while their dialect is 'real' and 'cool.' Shifting their perception to see MSA's value in formal contexts, literature, and pan-Arab communication is tough. They sometimes feel their dialect is looked down upon in the classroom, which is not my intention."

Participant 6 (French Teacher): "Motivating students to master complex grammar and formal vocabulary when they are more comfortable with simpler, perhaps more colloquial, structures is a constant challenge. The fear of making mistakes with the standard can also lead to reticence in speaking."

Q3: Do you believe there is a role for non-standard varieties in your language classroom? Please explain your reasoning.

Participant 1 (English Teacher): "Yes, absolutely. Non-standard varieties, like students' L1 influences or even different World Englishes, are already present. Ignoring them is unrealistic. I think acknowledging them helps build rapport, makes learning more relevant, and can be used as a springboard to discuss standard forms and register. It's about building awareness, not necessarily endorsement of all non-standard features in every context."

Participant 2 (Arabic Teacher): "Yes, there is a role, but a carefully managed one. I believe acknowledging colloquial Arabic can make learning MSA less daunting. For example, using dialectal examples to explain a grammatical concept that's similar across both registers can be effective. However, the primary goal remains proficiency in MSA for formal settings, so the balance is key."

Participant 3 (French Teacher): "Yes, definitely for cultural understanding and awareness. Discussing regional accents or historical dialectal influences helps students appreciate the richness of the French language and the diversity of its speakers. It can also normalize their own accents and reduce anxiety about speaking."

Participant 4 (English Teacher): "I think there's a role in making the classroom a safe space. If students use non-standard features that are common in their community or L1, I try to address it as a language difference, not an error, and then introduce the standard form as an alternative for specific purposes. It helps them see language as flexible and contextual."

Participant 5 (Arabic Teacher): "Yes, it is essential. Non-standard varieties are the students' lived reality. Ignoring them creates a disconnect. I believe we can use them to bridge gaps, show linguistic evolution, and even analyze differences. It fosters respect for their linguistic heritage while guiding them toward standard forms for wider communication."

Participant 6 (French Teacher): "Yes, for comprehension and exposure. If students can understand different accents or colloquialisms, they'll be better prepared for real-world French. My role is to expose them to these variations and then guide them on how to use the standard form effectively when needed, making them more versatile communicators."

Q4: What recommendations would you offer for improving teacher preparation in handling linguistic variation in foreign language education?

Participant 1 (English Teacher): "Teacher training programs should include dedicated modules on sociolinguistics, focusing on dialectal variation within major global languages like English. Practical workshops on how to analyze and address common learner errors stemming from L1 transfer would be invaluable."

Participant 2 (Arabic Teacher): "I recommend incorporating more content on diglossia and bidialectalism in Arabic language teacher education. Providing practical strategies for integrating colloquial Arabic into MSA instruction, along with clear guidelines on register shifting, would be highly beneficial."

Participant 3 (French Teacher): "Teacher preparation needs to move beyond just the Parisian standard. Including modules on the sociolinguistics of French, exposure to various regional and international varieties, and practical ways to teach pronunciation and grammar variation are essential."

Participant 4 (English Teacher): "More emphasis on critical language awareness and less on prescriptivism. Teacher training should empower us to view all linguistic varieties as legitimate communication systems and teach students how to navigate different registers and audiences, rather than solely focusing on a single 'correct' form."

Participant 5 (Arabic Teacher): "Teacher education should actively challenge linguistic prejudice and promote a more nuanced understanding of Arabic diglossia. Providing case studies and practical teaching materials that demonstrate effective ways to honor and leverage colloquial Arabic within the MSA curriculum is crucial."

Participant 6 (French Teacher): "Include more content on the history and social context of French dialects. Practical workshops on error analysis and differentiated instruction for students with varying linguistic backgrounds would greatly improve preparedness."

**Q2: What areas of professional development would help you better address linguistic diversity?**

1. **Participant 7 (English Teacher, 10 years exp.):** "Workshops on translanguaging strategies and how to leverage students' full linguistic repertoire in the classroom would be fantastic. I want to understand how to make their entire linguistic experience a resource, not a barrier."
2. **Participant 8 (Arabic Teacher, 6 years exp.):** "More explicit training on the differences between MSA and key Egyptian dialects, and how these differences manifest in grammar and vocabulary, would be very helpful. I need practical tools for comparison and contrast."
3. **Participant 9 (French Teacher, 3 years exp.):** "I need resources and training on assessing pronunciation accurately across different learner backgrounds without imposing a single ideal accent. Also, understanding common errors from Arabic speakers learning French pronunciation."
4. **Participant 10 (English Teacher, 18 years exp.):** "Training on how to use authentic materials that feature diverse English speakers and varieties, and then critically analyzing those materials with students. How to teach intelligibility over native-like accent."
5. **Participant 11 (Arabic Teacher, 2 years exp.):** "More guidance on the pedagogical implications of diglossia – when to insist on MSA, when to allow colloquialisms, and how to explain these choices to students and parents."
6. **Participant 12 (French Teacher, 20+ years exp.):** "Advanced sociolinguistics courses that delve into the prestige of different French varieties globally and how to navigate these perceptions with students in an Egyptian context."

**Q1: Describe a specific instance where you addressed a non-standard language feature used by a student and how you handled it.**

1. **Participant 7 (English Teacher):** "A student said 'I am *agree*' instead of 'I agree.' I praised their sentence structure and then said, 'In English, for this verb, we often just use 'agree' directly. So, 'I agree.' Your sentence was almost perfect!' This positive framing made the correction feel less like an error."
2. **Participant 8 (Arabic Teacher):** "A student from Upper Egypt used the verb 'أشوف' (ashuf - I see) where MSA would prefer 'أرى' (ara). I acknowledged that 'ashuf' is perfectly fine and very common. Then, I said, 'In formal contexts, like reading classical poetry or writing an essay, 'ara' is often used. Let's practice saying 'ara' together: أَرىٰ.' It was about offering an alternative for a specific context."
3. **Participant 9 (French Teacher):** "A student consistently pronounced 'h' as silent, as is common in Arabic. For example, 'otel' instead of 'hotel.' I introduced the 'h' sound with a visual aid, explaining that in French, it's usually silent too, except for 'h aspiré' and 'h muet.' We did a quick drill with words where 'h' is silent in French but pronounced in English, clarifying that this is a case where their L1 might actually align with the target language."
4. **Participant 10 (English Teacher):** "A student used African American Vernacular English (AAVE) phrasing like 'He be tired' to mean he is generally tired. I explained that in standard academic English, we'd use 'He is always tired' or 'He tends to be tired' to express habitual states. I validated their meaning but offered the standard convention."
5. **Participant 11 (Arabic Teacher):** "A student used a colloquial phrase that omits a required preposition in MSA. I didn't stop them mid-sentence. After they finished, I said, 'That's a great way to express that in Egyptian Arabic. In MSA, we would typically add the preposition 'بـ' (bi) here to make it 'أكتب بـ القلم' (aktub bil-qalam - I write with the pen). Let's try that structure.'"
6. **Participant 12 (French Teacher):** "A student omitted the 'ne' in negation ('Je sais pas' instead of 'Je ne sais pas'). I let them finish their thought and then rephrased, 'Ah, so you don't know. In French, we say 'Je ne sais pas.' It's important to include the 'ne' in formal French.' I made it a simple re-statement rather than a direct correction."

**Q2: What are the biggest challenges you face in teaching the standard variety of your target language, given the linguistic background of your students?**

1. **Participant 7 (English Teacher):** "Students' L1 Arabic often influences their intonation and stress patterns, which can sometimes affect comprehensibility. While I focus on clarity, it's challenging to address every subtle nuance without sounding overly critical of their natural speech."
2. **Participant 8 (Arabic Teacher):** "The biggest challenge is maintaining the students' interest in MSA when they are so comfortable and expressive in their dialect. They see MSA as an academic exercise, not a living language, and it's hard to convey its importance for formal communication and wider regional understanding."
3. **Participant 9 (French Teacher):** "The pronunciation of certain French sounds, like 'u' vs. 'ou,' or nasal vowels, can be difficult for Arabic speakers. Students also sometimes struggle with the gender agreement in French, which doesn't exist in Arabic, leading to persistent errors."
4. **Participant 10 (English Teacher):** "I find that students often struggle with verb tenses, particularly the past tense and perfect tenses, as Arabic has a different aspect system. Also, prepositions are a constant hurdle due to direct translation from Arabic."
5. **Participant 11 (Arabic Teacher):** "The sheer volume of vocabulary and grammatical structures in MSA that differ from the dialect is a challenge. Students need to memorize a lot, and it's difficult to make them internalize it for spontaneous use, especially in speaking."
6. **Participant 12 (French Teacher):** "The subjunctive mood in French is notoriously difficult. Students often revert to the indicative because it's simpler and more direct, which is understandable given their linguistic background, but mastering the subjunctive is crucial for advanced fluency."

**Q3: Do you believe there is a role for non-standard varieties in your language classroom? Please explain your reasoning.**

1. **Participant 7 (English Teacher):** "Yes, definitely. It's crucial for building confidence and validating students' identities. I use it to explain linguistic relativity – how different varieties serve different communicative functions. It opens discussions about audience and register."
2. **Participant 8 (Arabic Teacher):** "Absolutely. Non-standard Arabic is their identity. I use it to build bridges to MSA, showing similarities and differences, and to illustrate linguistic evolution. It makes the learning process more relatable and less intimidating."
3. **Participant 9 (French Teacher):** "Yes, for cultural context and to normalize accents. Understanding that French has many variations helps students feel less anxious about their own speech and more appreciative of Francophone diversity. It's about communicative competence, not just linguistic purity."
4. **Participant 10 (English Teacher):** "Yes, it makes the classroom more authentic. I can use student-generated non-standard utterances as teaching points, explaining why a standard form might be preferred in a formal essay or presentation. It promotes critical thinking about language use."
5. **Participant 11 (Arabic Teacher):** "Yes, it's vital for building rapport and addressing the students' immediate linguistic reality. I see it as a tool to make MSA more accessible, not as a replacement for it. We can compare and contrast, which deepens their understanding of both."
6. **Participant 12 (French Teacher):** "Yes, absolutely. It helps them understand that language is dynamic and serves various purposes. It also makes them more aware of the sociolinguistic context of French, preparing them for real-world interactions where they'll encounter diverse forms of the language."

**Q4: What recommendations would you offer for improving teacher preparation in handling linguistic variation in foreign language education?**

1. **Participant 7 (English Teacher):** "Teacher training should incorporate more practical, hands-on workshops on sociolinguistics and the teaching of English as a lingua franca (ELF). We need strategies for teaching intelligibility, not just accent reduction."
2. **Participant 8 (Arabic Teacher):** "Programs should include specialized tracks or modules on diglossia, dialectology for Arabic, and comparative pedagogy between MSA and Egyptian dialects. Providing authentic materials and lesson plans would be very beneficial."
3. **Participant 9 (French Teacher):** "More focus on phonetics and phonology for non-native speakers, specifically addressing common pronunciation challenges for Arabic learners of French. Also, understanding the sociolinguistic status of various French varieties."
4. **Participant 10 (English Teacher):** "Teacher training needs to challenge the 'native speaker fallacy' and embrace World Englishes. We need to be equipped to teach English as an international language and to foster critical language awareness in students about language variation."
5. **Participant 11 (Arabic Teacher):** "Teacher education programs should actively promote the idea that dialects are not 'wrong,' but different registers. Training should provide teachers with the linguistic tools and confidence to discuss these differences respectfully and pedagogically."
6. **Participant 12 (French Teacher):** "Include more content on the history and sociolinguistics of French, showcasing its diverse varieties. Practical teaching strategies for managing learner errors related to French pronunciation and grammar, considering their L1 background, would be highly beneficial."

**Q2: What areas of professional development would help you better address linguistic diversity?**

1. **(Arabic Teacher, Primary School, 3 yrs exp.):** "I need very basic workshops on identifying and classifying different Arabic dialects in Egypt. Knowing the main differences beyond Cairo/Upper Egypt would help me understand where my students are coming from."
2. **(English Teacher, Secondary, 15 yrs exp.):** "Training on World Englishes and how to present them as valid alternatives to native-speaker standards, rather than just 'mistakes'. Resources for teaching these varieties would be useful."
3. **(French Teacher, University, 7 yrs exp.):** "Advanced workshops on the sociolinguistics of French, specifically how regional variations are perceived and how to teach them critically. I need to feel confident discussing the 'Académie Française' versus colloquial French."
4. **(English Teacher, Secondary, 5 yrs exp.):** "Practical strategies for error correction that don't demotivate students. How to give feedback on non-standard forms without making them feel their current language is 'bad'."
5. **(Arabic Teacher, Secondary, 10 yrs exp.):** "I need to understand the linguistic basis of diglossia in Arabic better. Training on how to teach the grammatical differences between MSA and dialects systematically."
6. **(English Teacher, University, 12 yrs exp.):** "Understanding how to integrate translanguaging into an EFL curriculum that still requires adherence to standard forms for exams. Balancing fluidity with accuracy."
7. **(French Teacher, Secondary, 8 yrs exp.):** "Resources on teaching French pronunciation variations and common L1 transfer issues from Arabic speakers learning French. How to address sounds that don't exist in Arabic."
8. **(Arabic Teacher, Secondary, 4 yrs exp.):** "More content on the cultural significance of different Arabic dialects. Understanding why certain expressions are used and how they reflect identity."
9. **(English Teacher, Primary, 1 yr exp.):** "Basic awareness of common L1 (Arabic) influences on English phonology and grammar for young learners. Simple strategies to address these gently."
10. **(French Teacher, University, 18 yrs exp.):** "Advanced training on discourse analysis across different French varieties – how formality, politeness, and register vary, and how to teach these nuances."
11. **(Arabic Teacher, Secondary, 7 yrs exp.):** "How to assess students' progress in MSA without penalizing their dialectal fluency. Clear guidelines on what constitutes a 'language error' versus a 'dialectal feature' for assessment purposes."
12. **(English Teacher, Secondary, 12 yrs exp.):** "Workshops on critical language awareness, helping students understand how language varieties are positioned socially and why standards exist, but also why diversity is valuable."
13. **(French Teacher, Secondary, 5 yrs exp.):** "Practical lesson plans for teaching regional French vocabulary and expressions, and how to explain their context and usage."
14. **(English Teacher, Secondary, 20+ yrs exp.):** "More on teaching English as a Lingua Franca (ELF) principles – focusing on intelligibility, clarity, and mutual understanding rather than native-like accuracy."
15. **(Arabic Teacher, University, 15 yrs exp.):** "Training on how to handle situations where students use 'Arabizi' or code-switch heavily between English and Arabic in an Arabic class. Strategies to guide them back to MSA."
16. **(English Teacher, Secondary, 9 yrs exp.):** "Understanding the linguistic landscape of English in Egypt specifically – common learner errors, prevailing attitudes among students, and how to best support their learning journey."
17. **(French Teacher, Preparatory, 3 yrs exp.):** "Basic pronunciation and grammar workshops specifically for teaching French to Arabic speakers. Simple, actionable strategies for common difficulties."
18. **(Arabic Teacher, Secondary, 11 yrs exp.):** "How to use authentic media (films, songs, social media) that feature dialectal Arabic in a way that supports MSA learning."
19. **(English Teacher, Secondary, 6 yrs exp.):** "Training on how to create inclusive classroom environments where students don't feel ashamed of their accents or native language features."
20. **(French Teacher, University, 10 yrs exp.):** "More comparative linguistic analysis between Arabic and French to better explain pronunciation or grammatical differences."

**Q1: Describe a specific instance where you addressed a non-standard language feature used by a student and how you handled it.**

1. **(English Teacher):** "A student used 'for' instead of 'to' in an infinitive structure ('I want for go'). I smiled and said, 'That's a common mistake, it's easy to do. In English, after 'want,' we usually use 'to,' so 'I want to go.' Your meaning was perfectly clear, though!'"
2. **(Arabic Teacher):** "A student said 'مرحباً يا ولاد' (Marhaban ya 'wlad' - Hello, boys/guys) to the whole class when addressing them formally. I responded, 'Ahlan bikum, students,' and then later, during a quiet moment, explained that 'wlad' is colloquial and for the whole class, 'ayyuha al-tullab' (O students) is more formal MSA."
3. **(French Teacher):** "A student pronounced 'pas' (not) as 'pa', dropping the 's', which is common in spoken French but less formal. I waited for a natural pause and said, 'Remember, in formal French, we include the 'ne' and pronounce the 's' here, 'ne pas.' But 'pa' is very common, so it's good you know both!'"
4. **(English Teacher):** "A student used the phrasal verb 'make' where 'do' would be standard (e.g., 'make homework'). I validated their meaning and then offered the standard phrasing: 'Ah, you mean *doing* homework. So, 'I do my homework.' It's a subtle difference but important for formal writing.'"
5. **(Arabic Teacher):** "A student used a very specific dialectal verb form. I simply repeated the sentence with the MSA equivalent, saying, 'So, you mean you *will write* it like this: سأكتب (sa'aktub)?' The repetition and slight rephrasing served as a model without direct correction."
6. **(French Teacher):** "A student used 'je m'appelle Mohammed' for their name, which is a direct Arabic structure. I confirmed their name and then said, 'And in French, we say 'Je m'appelle Mohammed.' You have it almost perfect!' The validation and slight rephrasing were key."
7. **(English Teacher):** "A student said 'It is more better.' I said, 'Yes, it's better. 'More better' is a common way to say it, but in standard English, we just use 'better' because it's already comparative.' Then we practiced a few 'irregular' comparatives."
8. **(Arabic Teacher):** "A student pronounced the emphatic 'ص' (Saad) as a regular 'س' (Seen) in a word. I didn't interrupt, but later, when reviewing common pronunciation challenges, I used that specific word as an example of the emphatic sound, contrasting it with the non-emphatic version."
9. **(French Teacher):** "A student used a colloquial 'ça va?' as a formal greeting. I responded with a slightly more formal greeting back, 'Bonjour,' and then, later, showed them alternatives like 'Comment allez-vous?' for more formal situations."
10. **(English Teacher):** "A student used the plural form 'childs' instead of 'children'. I smiled and said, 'Children! Yes, it's an irregular plural, but you used the right idea. Let's practice 'child' and 'children' a few times.'"
11. **(Arabic Teacher):** "A student used a colloquial demonstrative pronoun. I responded by using the MSA demonstrative pronoun in my reply, essentially modeling the standard form without directly correcting theirs. The context provided the necessary clue."
12. **(French Teacher):** "A student pronounced 'beaucoup' (much/many) as 'bokoo', dropping the 'u'. I simply repeated it correctly, 'Boh-coo,' emphasizing the sound. No explicit mention of error, just modeling."
13. **(English Teacher):** "A student used 'He go' for the third person singular present tense. I said, 'He *goes*! That's right. We add an 's' for 'he,' 'she,' and 'it.' Good job remembering the context!' Positive reinforcement for the correct part of their attempt."
14. **(Arabic Teacher):** "A student used a common colloquial connective phrase. I let them finish, then offered, 'A very common way to connect these ideas in formal Arabic is using 'و' (wa - and) or 'ولكن' (walakin - but).' It was about providing options."

**Q2: What are the biggest challenges you face in teaching the standard variety of your target language, given the linguistic background of your students?**

1. **(English Teacher):** "The sheer volume of English they're exposed to daily via music, social media, and games is overwhelming. It's often informal, grammatically simplified, and filled with slang. Trying to teach them formal grammar and pronunciation standards feels like fighting a tsunami."
2. **(Arabic Teacher):** "Students associate MSA with formality and sometimes dryness, while their dialects are vibrant and expressive. Convincing them that MSA has its own beauty and power, especially in classical literature and formal discussions, is a constant uphill battle."
3. **(French Teacher):** "The French 'r' sound is a frequent challenge for Arabic speakers, often pronounced more like the Arabic 'ق' (Qaf) or guttural 'خ' (Kha). Also, distinguishing between 'u' and 'ou' sounds is difficult."
4. **(English Teacher):** "Students' confidence is a major issue. Many are hesitant to speak for fear of making errors, especially pronunciation errors that might mark them as non-native or from a particular dialect. I need to create a very supportive environment."
5. **(Arabic Teacher):** "The sheer difference in vocabulary and verb conjugations between MSA and their daily dialect is vast. Students have to learn a whole new lexicon and grammatical system, which is very demanding."
6. **(French Teacher):** "Getting students to consistently use correct gender and number agreement with nouns and adjectives is tough. Arabic doesn't have grammatical gender in the same way, so it's a new concept they often forget."
7. **(English Teacher):** "Idioms and phrasal verbs. English is rich with them, and their meanings are often not literal, making them hard to grasp for learners who are already dealing with basic grammar and vocabulary."
8. **(Arabic Teacher):** "The continuous, present tense aspect is expressed differently. In MSA, there's a particle 'سوف' (sawfa) or 'سـ' (sa-) for future, but the present continuous in English or French has no direct, simple equivalent in MSA that students can easily apply."
9. **(French Teacher):** "The subjunctive mood! It's so prevalent in French for expressing doubt, desire, emotion, etc., but it's a complex concept that Arabic speakers often find difficult to master and apply correctly."
10. **(English Teacher):** "Articles ('a,' 'an,' 'the'). English has them, Arabic doesn't in the same way, so students often omit them or use them incorrectly."
11. **(Arabic Teacher):** "The concept of 'diglossia' itself. Explaining why they need MSA when they speak a dialect perfectly well, and making them see the practical and cultural necessity of mastering it."
12. **(French Teacher):** "The liaison rules – when to pronounce the final consonant that would normally be silent when the next word starts with a vowel. It's an intricate aspect of spoken French."
13. **(English Teacher):** "Many students default to direct translations from Arabic for sentence structure, which can sound unnatural in English, especially with word order or verb placement."
14. **(Arabic Teacher):** "Students sometimes perceive MSA as 'rigid' or 'uncreative' compared to their dialect, which is rich in expressions for daily life. Making MSA feel dynamic and relevant is a challenge."

**Q3: Do you believe there is a role for non-standard varieties in your language classroom? Please explain your reasoning.**

1. **(English Teacher):** "Yes, absolutely. It's crucial for building confidence and validating students' identities. I use it to explain linguistic relativity—how different varieties serve different communicative functions. It opens discussions about audience and register."
2. **(Arabic Teacher):** "Yes, it's essential. Non-standard varieties are students' lived reality. I use them to build bridges to MSA, showing similarities and differences, and to illustrate linguistic evolution. It fosters respect for their linguistic heritage while guiding them toward standard forms for wider communication."
3. **(French Teacher):** "Yes, for cultural context and to normalize accents. Understanding that French has many variations helps students feel less anxious about their own speech and more appreciative of Francophone diversity. It's about communicative competence, not just linguistic purity."
4. **(English Teacher):** "Yes, it makes the classroom more authentic. I can use student-generated non-standard utterances as teaching points, explaining why a standard form might be preferred in a formal essay or presentation. It promotes critical thinking about language use."
5. **(Arabic Teacher):** "Yes, it is essential. Non-standard varieties are the students' lived reality. Ignoring them creates a disconnect. I believe we can use them to bridge gaps, show linguistic evolution, and even analyze differences. It fosters respect for their linguistic heritage while guiding them toward standard forms for wider communication."
6. **(French Teacher):** "Yes, absolutely. It helps them understand that language is dynamic and serves various purposes. It also makes them more aware of the sociolinguistic context of French, preparing them for real-world interactions where they'll encounter diverse forms of the language."
7. **(English Teacher):** "Yes, for building confidence. When students hear their own phrasing, slightly modified, used as a teaching example, they feel seen. It validates their background while guiding them towards the target standard."
8. **(Arabic Teacher):** "Yes, it is a must. To deny the reality of their dialect is to alienate them. I use it for contrastive analysis—showing how MSA expresses certain concepts differently, which can be very effective for learning."
9. **(French Teacher):** "Yes, for comprehensibility. If students can understand different accents or colloquialisms, they'll be better prepared for real-world French. My role is to expose them to these variations and then guide them on how to use the standard form effectively when needed, making them more versatile communicators."
10. **(English Teacher):** "Absolutely. It helps demystify 'standard' English and shows that language is a social construct. I use it to discuss register and audience appropriateness."
11. **(Arabic Teacher):** "Yes, as a gateway. When students are struggling with an MSA concept, I might use a dialectal parallel to explain it first, then introduce the MSA term and context. It lowers the barrier to entry."
12. **(French Teacher):** "Yes, to foster critical thinking about language. We can discuss why certain forms are considered 'standard' and what happens to the varieties that aren't."
13. **(English Teacher):** "Yes, for error analysis. Understanding *why* they make certain mistakes (often due to L1 transfer) helps me teach more effectively. Acknowledging the non-standard form first can make the correction more palatable."
14. **(Arabic Teacher):** "Yes, it is part of their linguistic identity. I find that acknowledging and even sometimes subtly incorporating some common, inoffensive dialectal phrases can make the classroom more welcoming and less intimidating."
15. **(French Teacher):** "Yes, for cultural appreciation. Learning about the regional origins of certain French expressions or pronunciations enriches their understanding of the language's diversity."
16. **(English Teacher):** "Yes, as a diagnostic tool. It helps me pinpoint specific areas where students need support, especially if their errors are consistent and relate to L1 interference."
17. **(Arabic Teacher):** "Yes, especially for speaking. We can practice role-playing where they use their dialect among themselves and then switch to MSA for a 'formal presentation' scenario."
18. **(French Teacher):** "Yes, for building confidence. When students can express themselves naturally, even with a non-standard accent, it encourages them to communicate more freely."
19. **(English Teacher):** "Yes, to discuss language change. It's interesting to show students how languages evolve, and dialects are a part of that natural process."
20. **(Arabic Teacher):** "Yes, as a comparative linguistic tool. Understanding the 'why' behind MSA differences helps them internalize it better than rote memorization."
21. **(French Teacher):** "Yes, it humanizes the language. It shows them that language isn't just rules, but a living, breathing thing with regional flavors."
22. **(English Teacher):** "Yes, for metacognitive awareness. Helping them understand that different languages and varieties have different rules and social implications."
23. **(Arabic Teacher):** "Yes, to make the classroom feel less like a foreign place and more connected to their lives. It builds an immediate bridge of understanding."
24. **(French Teacher):** "Yes, to prepare them for real-world situations where they will encounter a range of French speakers, not just one idealized standard."

**Q4: What recommendations would you offer for improving teacher preparation in handling linguistic variation in foreign language education?**

1. **(English Teacher):** "Teacher training should include more explicit modules on sociolinguistics, phonetics for second language learners, and practical error analysis specific to Arabic speakers learning English."
2. **(Arabic Teacher):** "Pre-service training needs to address diglossia in Arabic more directly, offering comparative linguistic studies and practical classroom strategies for integrating colloquial Arabic into MSA instruction."
3. **(French Teacher):** "More emphasis on the sociolinguistics of French, including exposure to and analysis of various regional and international French varieties, and specific pronunciation training for Arabic speakers."
4. **(English Teacher):** "Trainers should challenge the native-speaker norm and focus on World Englishes, intelligibility, and critical language awareness. We need to feel empowered to validate students' linguistic backgrounds."
5. **(Arabic Teacher):** "Programs should aim to destigmatize dialects and teach prospective teachers how to discuss linguistic variation respectfully, providing them with practical resources and lesson plans."
6. **(French Teacher):** "Include more historical and sociolinguistic context for French dialects. Practical workshops on error correction and assessment strategies that account for linguistic diversity are crucial."
7. **(English Teacher):** "Offer courses on 'Teaching English as a Lingua Franca' (ELF) and the role of translanguaging in the classroom."
8. **(Arabic Teacher):** "Teacher education should explicitly cover the linguistic features of major Egyptian Arabic dialects and provide strategies for comparative teaching with MSA."
9. **(French Teacher):** "More practical training on managing multilingual classrooms and addressing common L1 interference in pronunciation and grammar for Arabic speakers."
10. **(English Teacher):** "Focus on developing teachers' ability to analyze student language use critically, understanding the social and linguistic factors behind their choices."
11. **(Arabic Teacher):** "Provide teachers with tools to help students navigate the diglossic situation in Arabic, explaining the value of MSA in formal contexts."
12. **(French Teacher):** "Include practical guidance on how to introduce and discuss regional French variations without prioritizing one over the others."
13. **(English Teacher):** "Emphasize the role of formative assessment that acknowledges communicative competence, not just grammatical accuracy in the standard."
14. **(Arabic Teacher):** "Teacher training should explicitly address the challenges of vocabulary acquisition and grammatical differences between MSA and dialects, offering pedagogical solutions."
15. **(French Teacher):** "More on adapting authentic materials that contain varied French registers and accents, and how to teach students to comprehend them."
16. **(English Teacher):** "Focus on building teacher confidence in discussing language variation, including slang, idioms, and register shifts."
17. **(Arabic Teacher):** "Provide teachers with clear frameworks for discussing the concept of 'standard' vs. 'colloquial' in Arabic, emphasizing their respective domains and functions."
18. **(French Teacher):** "Training on how to create positive classroom attitudes towards all accents and varieties of French spoken by learners."
19. **(English Teacher):** "More explicit focus on teaching the 'why' behind standard English conventions, rather than just the 'what'."
20. **(Arabic Teacher):** "Develop practical strategies for teaching MSA verb conjugations and sentence structures that are significantly different from colloquial usage."
21. **(French Teacher):** "Include modules on the history of the French language and how regional varieties developed, to provide context for learners."
22. **(English Teacher):** "Training on how to leverage students' L1, rather than seeing it as an obstacle, to build bridges to English learning."
23. **(Arabic Teacher):** "Provide teachers with strategies to make MSA feel relevant and engaging for younger generations, perhaps through modern media or relatable topics."
24. **(French Teacher):** "Focus on building communicative competence, which includes understanding and using appropriate registers and formality levels."

**Q2: What areas of professional development would help you better address linguistic diversity?**

1. **(English Teacher, Primary, 2 yrs exp.):** "Understanding how to introduce basic pronunciation differences without making young children self-conscious about their accent."
2. **(Arabic Teacher, Secondary, 10 yrs exp.):** "Practical workshops on comparative phonetics between Arabic dialects and MSA."
3. **(French Teacher, University, 15 yrs exp.):** "Training on incorporating global Francophonie varieties and their socio-linguistic relevance into the curriculum."
4. **(English Teacher, Secondary, 7 yrs exp.):** "Strategies for teaching common grammatical errors arising from Arabic interference in English syntax."
5. **(Arabic Teacher, Preparatory, 4 yrs exp.):** "Guidance on how to teach the historical development of Arabic dialects and their relationship to MSA."
6. **(French Teacher, Secondary, 12 yrs exp.):** "More resources on teaching French verb conjugations, particularly the subjunctive, considering L1 interference."
7. **(English Teacher, University, 20+ yrs exp.):** "Advanced training on critical discourse analysis of media texts featuring varied English usage."
8. **(Arabic Teacher, Primary, 3 yrs exp.):** "Basic Arabic linguistics refresher for teachers, focusing on dialectal variation and MSA distinctions."
9. **(French Teacher, Secondary, 5 yrs exp.):** "Workshops on how to assess oral proficiency fairly, acknowledging different accents and linguistic backgrounds."
10. **(English Teacher, Secondary, 8 yrs exp.):** "How to teach idiomatic expressions and phrasal verbs that are highly culture-specific or register-dependent."
11. **(Arabic Teacher, Secondary, 9 yrs exp.):** "Training on teaching the passive voice and other grammatical structures that differ significantly between dialects and MSA."
12. **(French Teacher, University, 11 yrs exp.):** "Strategies for teaching formal vs. informal French vocabulary and registers effectively."
13. **(English Teacher, Primary, 1 yr exp.):** "Understanding common errors in article usage ('a', 'an', 'the') for Arabic speakers."
14. **(Arabic Teacher, Secondary, 6 yrs exp.):** "How to conduct effective contrastive analysis between colloquial and MSA grammar for students."
15. **(French Teacher, Secondary, 10 yrs exp.):** "Practical methods for teaching French liaison and elision rules."
16. **(English Teacher, Secondary, 18 yrs exp.):** "Training on teaching English as a Lingua Franca (ELF) principles and the concept of mutual intelligibility."
17. **(Arabic Teacher, University, 15 yrs exp.):** "Guidance on addressing 'Arabizi' and code-switching in the classroom context."
18. **(French Teacher, Secondary, 3 yrs exp.):** "Resources on teaching French gender and number agreement for Arabic speakers."
19. **(English Teacher, Secondary, 7 yrs exp.):** "Developing lessons that explicitly compare and contrast standard English with learner varieties, highlighting function and context."
20. **(Arabic Teacher, Secondary, 10 yrs exp.):** "Strategies for teaching MSA vocabulary that has no direct equivalent in students' dialects."
21. **(French Teacher, University, 12 yrs exp.):** "Advanced training on teaching the French subjunctive mood, focusing on common learner errors."
22. **(English Teacher, Secondary, 5 yrs exp.):** "Workshops on teaching appropriate formality and politeness levels in English for different situations."
23. **(Arabic Teacher, Preparatory, 4 yrs exp.):** "Understanding the historical linguistic roots of common dialectal variations."
24. **(French Teacher, Secondary, 8 yrs exp.):** "How to use authentic French media that showcase different accents and sociolects."
25. **(English Teacher, University, 20+ yrs exp.):** "Developing critical language awareness: teaching students about language attitudes and prestige."
26. **(Arabic Teacher, Primary, 3 yrs exp.):** "Basic phonics for MSA, focusing on sounds absent or different in common Egyptian dialects."
27. **(French Teacher, Secondary, 15 yrs exp.):** "Strategies for addressing students' Arabic-influenced rhythm and intonation in French."
28. **(English Teacher, Secondary, 10 yrs exp.):** "Training on how to use error correction effectively without demotivating students."
29. **(Arabic Teacher, Secondary, 6 yrs exp.):** "Guidance on assessing spoken MSA in a way that reflects authentic communicative needs."
30. **(French Teacher, University, 7 yrs exp.):** "How to discuss the role of the 'h aspiré' in French pronunciation and its exceptions."

**Q1: Describe a specific instance where you addressed a non-standard language feature used by a student and how you handled it.**

1. **(English Teacher):** "A student used 'very big' instead of 'very large' or 'huge'. I responded, 'Yes, it's very big. Sometimes we say 'enormous' or 'huge' to express that. 'Very big' is perfectly understandable though!'"
2. **(Arabic Teacher):** "A student used a common colloquial filler word in an MSA sentence. I gently rephrased their sentence without the filler, saying, 'So, you mean *this* way. In MSA, we might use 'إذًا' (idhan - therefore) or simply continue the sentence.' It was about offering alternatives."
3. **(French Teacher):** "A student said 'Je vais aller' (I am going to go), which is grammatically correct but a bit redundant. I said, 'Yes, you will go! And in French, we often shorten that to 'Je vais y aller' or just 'J'irai' (I will go). You've got the idea!'"
4. **(English Teacher):** "A student used 'He don't' instead of 'He doesn't.' I followed up with, 'Yes, he *doesn't*. Remember, for 'he,' 'she,' 'it,' we add that 's' to 'do' making it 'doesn't.' Good try!' Focusing on the rule positively."
5. **(Arabic Teacher):** "A student used a dialectal plural for a word where MSA has a different, often more classical, plural. I said, 'Yes, that's the way we say it every day. In formal Arabic, the plural is often *this* way (demonstrating). Both are useful to know for different situations.'"
6. **(French Teacher):** "A student confused 'savoir' (to know facts) and 'connaître' (to know people/places). I didn't interrupt, but later, I used their sentence as an example in a mini-lesson, explaining the difference clearly with their context."
7. **(English Teacher):** "A student used 'more better'. I said, 'Yes, better! 'Better' is already the comparative, so we don't need 'more.' It's a common slip.'"
8. **(Arabic Teacher):** "A student used a very specific colloquial negation that is less common or considered less formal in MSA. I responded with the MSA negation and a slight nod, allowing them to continue, and then later reinforced the MSA negation in a controlled practice activity."
9. **(French Teacher):** "A student used 'beaucoup de' (a lot of) with an uncountable noun where a different structure would be standard. I accepted the meaning and then offered, 'Yes, *beaucoup de* is good. We also often say *très* (very) *much* with these words, like *très chaud* (very hot).'"
10. **(English Teacher):** "A student said 'I am boring' when they meant 'I am bored.' I clarified, 'Ah, so you're not bored, you're *boring* others! That means you make them bored. If you feel bored, you say 'I am bored.'' Gentle clarification of meaning."
11. **(Arabic Teacher):** "A student used a dialectal phrase that implied future action without the standard MSA future prefix. I responded using the MSA future prefix and continued the conversation, modeling the standard form."
12. **(French Teacher):** "A student used 'je veux' (I want) where 'I would like' ('je voudrais') was more appropriate for politeness. I said, 'Yes, you want it! And to ask politely, we can say 'Je voudrais...'."
13. **(English Teacher):** "A student used 'He have' instead of 'He has.' I said, 'Right, he *has*. Remember 's' for 'he,' 'she,' 'it' in the present tense. Good try!'"
14. **(Arabic Teacher):** "A student used a colloquial imperative. I responded with the MSA imperative and a small smile, then used that MSA form in my next question to them."
15. **(French Teacher):** "A student used a colloquial expression that was too informal for the context. I simply translated it into the standard French equivalent without pointing out the 'error'."
16. **(English Teacher):** "A student used 'There is' with a plural noun. I responded, 'Yes, there *are* more books. Remember, we use 'are' with plural nouns.' It was a quick, embedded correction."
17. **(Arabic Teacher):** "A student used a dialectal possessive pronoun. I acknowledged it and then offered, 'In formal Arabic, it would be *this* way (demonstrating the MSA possessive).'"
18. **(French Teacher):** "A student confused 'c'est' and 'il est' in a sentence. I rephrased their sentence correctly, focusing on the standard usage for that specific context."
19. **(English Teacher):** "A student used 'very fastly'. I smiled and said, 'Fast is already an adverb, so we just say 'very fast.' It's a common one!'"
20. **(Arabic Teacher):** "A student omitted a short vowel ending in MSA reading. I gently repeated the word with the correct ending, emphasizing the vowel sound."
21. **(French Teacher):** "A student used a colloquial verb for 'to leave' when MSA/standard French prefers 'partir' or 'quitter'. I accepted their meaning and offered the standard alternative in my response."
22. **(English Teacher):** "A student used 'I am agree' instead of 'I agree.' I validated their statement and then offered, 'Yes, 'I agree.' That's the standard way.'"
23. **(Arabic Teacher):** "A student used a dialectal word for 'to know' (a specific verb). I acknowledged their meaning and provided the MSA equivalent, explaining it was for more formal contexts."
24. **(French Teacher):** "A student used a more informal pronoun for 'you' ('tu') in a situation where 'vous' was appropriate. I simply responded using 'vous' when addressing them, modeling the standard formality."

**Q2: What are the biggest challenges you face in teaching the standard variety of your target language, given the linguistic background of your students?**

1. **(English Teacher):** "Bridging the gap between the students' highly colloquial, often code-switched, English and the formal English required for academic settings and exams."
2. **(Arabic Teacher):** "The emotional and social attachment students have to their dialects; they often perceive MSA as a 'foreign' or 'prestigious' dialect rather than their own formal register."
3. **(French Teacher):** "Students' low confidence in their pronunciation, often due to the influence of Arabic sounds, making them reluctant to speak without fear of judgment."
4. **(English Teacher):** "Managing the diverse levels of English proficiency within a single classroom, especially when some students are significantly influenced by their L1 grammar."
5. **(Arabic Teacher):** "The perceived lack of utility or 'coolness' of MSA among young learners compared to their highly expressive and contextually relevant dialects."
6. **(French Teacher):** "The sheer volume of new grammatical structures (like the subjunctive, passive voice, and complex agreement rules) that have no direct parallel in Arabic."
7. **(English Teacher):** "Teaching the nuances of subtle meaning differences between synonyms and the appropriate contexts for using more formal vocabulary."
8. **(Arabic Teacher):** "The challenges of teaching MSA phonemes that are not present or are realized differently in their native dialect (e.g., emphatic consonants)."
9. **(French Teacher):** "Students' difficulty in internalizing gender and number agreement, which requires a constant cognitive shift from their Arabic linguistic background."
10. **(English Teacher):** "The prevalence of informal or non-standard forms in the media and online resources students consume, which can overshadow formal instruction."
11. **(Arabic Teacher):** "The resistance some students show to MSA, viewing it as 'artificial' or 'less authentic' than their everyday language."
12. **(French Teacher):** "Explaining abstract grammatical concepts like the subjunctive mood clearly and making it seem relevant to their communicative needs."
13. **(English Teacher):** "Teaching the correct usage of articles ('a', 'an', 'the') which are often omitted or used differently in Arabic."
14. **(Arabic Teacher):** "Making MSA relevant and interesting when the dialect is so much more expressive for their daily lives and social interactions."
15. **(French Teacher):** "The complexity of French verb conjugations, especially in different tenses and moods, which requires extensive memorization and practice."
16. **(English Teacher):** "Ensuring students understand and correctly use prepositions, which often don't map directly from Arabic."
17. **(Arabic Teacher):** "Helping students navigate the extensive vocabulary and formal sentence structures of MSA that are absent in their dialects."
18. **(French Teacher):** "Teaching the concept of 'liaison' and 'enchaînement' in spoken French, which is crucial for fluency but absent in Arabic."
19. **(English Teacher):** "Addressing the challenge of students directly translating sentence structures from Arabic, leading to unidiomatic English."
20. **(Arabic Teacher):** "Demonstrating the value of MSA for broader communication, literature, and academic pursuits beyond their local dialect."
21. **(French Teacher):** "The historical evolution of French and how it led to the current standard and regional variations, which can be a lot to cover."
22. **(English Teacher):** "Helping students differentiate between formal and informal registers in English for various communicative tasks."
23. **(Arabic Teacher):** "Making MSA feel dynamic and engaging rather than a rigid, outdated form of language."
24. **(French Teacher):** "Ensuring students understand the nuances of politeness and formality in French address terms and verb usage."

**Q3: Do you believe there is a role for non-standard varieties in your language classroom? Please explain your reasoning.**

1. **(English Teacher):** "Yes, for building bridges. It validates students' existing linguistic knowledge and makes them more receptive to learning standard forms by seeing the connections or differences."
2. **(Arabic Teacher):** "Absolutely. It fosters a more inclusive learning environment and helps students feel their linguistic identity is respected, which can reduce anxiety and increase participation."
3. **(French Teacher):** "Yes, for cultural awareness. It opens up discussions about diversity within the French-speaking world and helps students appreciate that language is not monolithic."
4. **(English Teacher):** "Yes, as a tool for contrastive analysis. We can compare L1 features with target language features to highlight specific learning points."
5. **(Arabic Teacher):** "Crucial for rapport-building. Acknowledging their dialect shows empathy and makes the learning process more relatable, easing the cognitive load of learning MSA."
6. **(French Teacher):** "Yes, for developing metalinguistic awareness—understanding what language is, how it varies, and why standard forms are prioritized in certain contexts."
7. **(English Teacher):** "It helps students understand register. We can discuss when and why a non-standard form might be acceptable among peers but not in a formal essay."
8. **(Arabic Teacher):** "It's a vital bridge for comprehension. If students understand a concept via their dialect, it's easier to transfer that understanding to MSA."
9. **(French Teacher):** "Yes, for demystifying language. It shows students that variations aren't necessarily 'wrong,' but functional within specific communities."
10. **(English Teacher):** "It fosters confidence. When students see their existing language used as a resource, they are more willing to take risks and learn."
11. **(Arabic Teacher):** "Yes, for making MSA feel 'alive.' We can discuss how MSA influences dialects and vice-versa, showing a dynamic linguistic connection."
12. **(French Teacher):** "It normalizes accents and can reduce the anxiety associated with pronunciation, encouraging more speaking practice."
13. **(English Teacher):** "It aids in error analysis. Understanding the source of an error (e.g., L1 transfer) helps in targeted correction."
14. **(Arabic Teacher):** "It's essential for identity validation. Acknowledging their dialect shows respect for their background and makes them more receptive to learning MSA."
15. **(French Teacher):** "It helps students appreciate the diversity within the Francophone world, making their learning more culturally rich."
16. **(English Teacher):** "It promotes critical thinking about language choices and their social implications."
17. **(Arabic Teacher):** "Yes, for comprehension. Using dialectal parallels can make abstract MSA concepts more concrete."
18. **(French Teacher):** "It humanizes the language; showing that formal standards exist alongside living, evolving varieties."
19. **(English Teacher):** "It helps teach about language change and variation as natural linguistic phenomena."
20. **(Arabic Teacher):** "It's a tool for comparative linguistics, helping students internalize MSA differences."
21. **(French Teacher):** "It prepares students for real-world interactions where they will encounter many different French accents and registers."
22. **(English Teacher):** "It can be used to teach pragmatics – how meaning is conveyed beyond literal words."
23. **(Arabic Teacher):** "It validates their existing communicative competence before introducing new forms."
24. **(French Teacher):** "It provides natural points of comparison for grammar and vocabulary, making learning more intuitive."

**Q4: What recommendations would you offer for improving teacher preparation in handling linguistic variation in foreign language education?**

1. **(English Teacher):** "More practical workshops on sociolinguistics, World Englishes, and strategies for teaching intelligibility over native-like accuracy."
2. **(Arabic Teacher):** "Dedicated modules on Arabic diglossia, dialectology, and comparative pedagogy between MSA and Egyptian dialects."
3. **(French Teacher):** "Training on the sociolinguistics of French, including regional variations and their perception, with practical pronunciation and assessment strategies for Arabic speakers."
4. **(English Teacher):** "Challenge the native-speaker ideal; incorporate critical language awareness and provide resources for teaching English as a Lingua Franca (ELF)."
5. **(Arabic Teacher):** "Programs should actively destigmatize dialects and offer teachers tools to discuss linguistic variation respectfully and pedagogically."
6. **(French Teacher):** "Include practical methods for teaching French phonetics, agreement rules, and the subjunctive mood, with attention to L1 interference."
7. **(English Teacher):** "Focus on translanguaging and leveraging students' entire linguistic repertoires as a resource."
8. **(Arabic Teacher):** "Provide teachers with explicit linguistic analysis of MSA vs. dialectal differences and comparative teaching techniques."
9. **(French Teacher):** "Offer practical guidance on adapting authentic materials featuring diverse French varieties and accents."
10. **(English Teacher):** "Develop curriculum that integrates discussion of register, politeness, and the social function of different language features."
11. **(Arabic Teacher):** "Train teachers on how to address 'Arabizi' and code-switching, offering strategies to navigate these phenomena constructively."
12. **(French Teacher):** "Provide teachers with assessment strategies that are fair to all linguistic backgrounds and acknowledge diverse forms of communicative competence."
13. **(English Teacher):** "Include more on teaching idiomatic expressions and phrasal verbs, focusing on contextual understanding."
14. **(Arabic Teacher):** "Offer teachers specific strategies for making MSA feel relevant and engaging to younger learners, perhaps through modern media."
15. **(French Teacher):** "Training on the historical development of French and its regional variations to provide context for students."
16. **(English Teacher):** "Focus on building teachers' confidence in discussing language variation and challenging linguistic prejudice."
17. **(Arabic Teacher):** "Provide concrete examples of how to use dialectal features to explain MSA grammar or vocabulary."
18. **(French Teacher):** "Develop practical frameworks for error analysis and feedback that are sensitive to L1 interference."
19. **(English Teacher):** "Train teachers on assessing intelligibility and communicative effectiveness over native-like pronunciation."
20. **(Arabic Teacher):** "Include modules on the sociolinguistics of Arabic dialects in Egypt and their role in national identity."
21. **(French Teacher):** "Provide strategies for teaching French liaison and elision, common pronunciation challenges for Arabic speakers."
22. **(English Teacher):** "Offer guidance on using authentic materials featuring a range of English varieties and how to analyze them with students."
23. **(Arabic Teacher):** "Focus on making MSA feel 'alive' and useful, perhaps through contemporary literature or media analysis."
24. **(French Teacher):** "Train teachers on how to foster positive attitudes towards different French accents among students."

**Q2: What areas of professional development would help you better address linguistic diversity?**

1. **(English Teacher, Secondary, 7 yrs exp.):** "Understanding how to code-switch effectively myself as a teacher to model appropriate language use."
2. **(Arabic Teacher, University, 18 yrs exp.):** "Training on the grammatical divergences between major Egyptian dialects and MSA that are most likely to impede formal communication."
3. **(French Teacher, Primary, 4 yrs exp.):** "Practical activities for teaching French verb agreement, a common difficulty for Arabic speakers."
4. **(English Teacher, Secondary, 10 yrs exp.):** "Strategies for teaching discourse markers and connectors that differ across English varieties and registers."
5. **(Arabic Teacher, Secondary, 5 yrs exp.):** "More on the impact of regional dialects on students' written Arabic in formal academic contexts."
6. **(French Teacher, Secondary, 12 yrs exp.):** "How to teach French politeness markers and formal address ('vous' vs. 'tu') effectively for different social contexts."
7. **(English Teacher, University, 15 yrs exp.):** "Workshops on the sociolinguistics of English globally – how varieties are perceived and valued."
8. **(Arabic Teacher, Secondary, 3 yrs exp.):** "Basic Arabic phonetics refresher: teaching the specific articulatory features of emphatic consonants in MSA."
9. **(French Teacher, Primary, 6 yrs exp.):** "Methods for teaching French articles ('le', 'la', 'les', 'un', 'une') given their absence in similar forms in Arabic."
10. **(English Teacher, Secondary, 11 yrs exp.):** "Teaching common errors in sentence formation due to direct translation from Arabic sentence structures."
11. **(Arabic Teacher, Secondary, 9 yrs exp.):** "Guidance on the nuances of MSA vocabulary that differ from everyday dialect, especially abstract concepts."
12. **(French Teacher, University, 10 yrs exp.):** "Strategies for teaching the formation and usage of the French subjunctive mood."
13. **(English Teacher, Primary, 2 yrs exp.):** "Understanding common mistakes with English auxiliaries (do/does/did) for Arabic speakers."
14. **(Arabic Teacher, Secondary, 7 yrs exp.):** "How to explain and teach the use of MSA demonstrative pronouns correctly."
15. **(French Teacher, Secondary, 14 yrs exp.):** "Practical ways to teach correct French pronoun usage, especially object pronouns."
16. **(English Teacher, Secondary, 5 yrs exp.):** "Resources on teaching the differences between countable and uncountable nouns in English."
17. **(Arabic Teacher, Secondary, 10 yrs exp.):** "More on the cultural implications of using specific dialectal expressions versus MSA in different social settings."
18. **(French Teacher, Primary, 5 yrs exp.):** "Activities for practicing French adverb placement, which can be tricky for Arabic speakers."
19. **(English Teacher, University, 15 yrs exp.):** "Training on teaching English for academic purposes (EAP), focusing on formal writing and speaking conventions."
20. **(Arabic Teacher, Secondary, 8 yrs exp.):** "How to explain the grammatical role of case endings in MSA verbs and nouns."
21. **(French Teacher, Secondary, 12 yrs exp.):** "Strategies for teaching French adjective agreement rules, a common challenge."
22. **(English Teacher, Secondary, 6 yrs exp.):** "Workshops on teaching the correct use of the modal verbs in English and their subtle meaning differences."
23. **(Arabic Teacher, Secondary, 10 yrs exp.):** "Guidance on the rules of sound assimilation and elision in MSA, as opposed to dialect."
24. **(French Teacher, University, 18 yrs exp.):** "More on teaching French relative pronouns ('qui', 'que', 'dont', 'où')."
25. **(English Teacher, Secondary, 9 yrs exp.):** "Training on the use of reported speech and the challenges of tense shifts."
26. **(Arabic Teacher, Secondary, 3 yrs exp.):** "How to use MSA proverbs and idioms to illustrate cultural points and vocabulary."
27. **(French Teacher, Secondary, 7 yrs exp.):** "Practical methods for teaching the imperative mood and its different forms in French."
28. **(English Teacher, University, 15 yrs exp.):** "Developing teacher skills in identifying and addressing 'false friends' between Arabic and English vocabulary."
29. **(Arabic Teacher, Secondary, 11 yrs exp.):** "Guidance on teaching the nuances of MSA rhetorical devices and literary expressions."
30. **(French Teacher, Secondary, 5 yrs exp.):** "Strategies for teaching the passive voice in French and its common uses."
31. **(English Teacher, Primary, 2 yrs exp.):** "How to teach children about different English-speaking cultures and their associated language varieties."
32. **(Arabic Teacher, Secondary, 10 yrs exp.):** "Training on the impact of diglossia on students' literacy skills in MSA."
33. **(French Teacher, University, 15 yrs exp.):** "More on teaching the specific sounds of French that are not present in Arabic (e.g., French 'r', nasal vowels)."
34. **(English Teacher, Secondary, 7 yrs exp.):** "How to foster independent learning strategies for vocabulary acquisition, especially for abstract terms."
35. **(Arabic Teacher, Secondary, 4 yrs exp.):** "Guidance on teaching Arabic sentence structure variations and word order."
36. **(French Teacher, Secondary, 12 yrs exp.):** "Practical lesson ideas for teaching French agreement rules (adjective-noun, subject-verb) systematically."
37. **(English Teacher, University, 18 yrs exp.):** "Training on teaching academic writing conventions in English, including citation and formal tone."
38. **(Arabic Teacher, Secondary, 5 yrs exp.):** "More on the socio-historical context of MSA and its development."
39. **(French Teacher, Primary, 3 yrs exp.):** "Simple techniques for introducing French question formation and negation."
40. **(English Teacher, Secondary, 10 yrs exp.):** "How to teach the nuances of verb tense usage, particularly past tenses and perfect tenses."
41. **(Arabic Teacher, Secondary, 7 yrs exp.):** "Guidance on the rules of Arabic verb conjugation and their different forms."
42. **(French Teacher, Secondary, 12 yrs exp.):** "Strategies for teaching the use of common French adverbs and their placement."
43. **(English Teacher, Primary, 1 yr exp.):** "Understanding common errors in English plurals and possessives for Arabic speakers."
44. **(Arabic Teacher, Secondary, 10 yrs exp.):** "How to explain the role of case endings in MSA for grammatical function."
45. **(French Teacher, Secondary, 5 yrs exp.):** "Practical methods for teaching French reflexive verbs."
46. **(English Teacher, University, 15 yrs exp.):** "Workshops on teaching argumentation and coherence in academic English writing."
47. **(Arabic Teacher, Secondary, 8 yrs exp.):** "More on teaching Arabic sentence connectors and discourse markers."
48. **(French Teacher, Secondary, 10 yrs exp.):** "Strategies for teaching the French conditional mood."
49. **(English Teacher, Secondary, 7 yrs exp.):** "How to teach the subtle differences between 'since' and 'for' in English."
50. **(Arabic Teacher, Secondary, 12 yrs exp.):** "Guidance on teaching Arabic sentence inversion and its stylistic purposes."

**Q1: Describe a specific instance where you addressed a non-standard language feature used by a student and how you handled it.**

1. **(English Teacher):** "A student used 'I am going' for a habitual action instead of the simple present. I said, 'Yes, you are going now. If you do that every day, we say 'I go.' Your meaning is clear, but 'I go' is how we talk about regular things.'"
2. **(Arabic Teacher):** "A student used a dialectal verb meaning 'to be able to' where MSA requires 'يستطيع' (yastatee'). I acknowledged their meaning and said, 'Yes, that's understood. In formal Arabic, we use 'yastatee'' often. Let's try it: 'استطيع أن أكتب' (astatee' an aktub - I can write).'"
3. **(French Teacher):** "A student said 'Je parle français très bien' with a flattened 'a' sound. I gently modelled the standard French 'a' sound separately and then within a word, 'parle,' encouraging them to try it."
4. **(English Teacher):** "A student used 'He is more taller' instead of 'He is taller.' I corrected it by saying, 'Taller! Yes, you're right. 'Taller' already has 'more' in it. Good job!' Positive reinforcement on the correct part."
5. **(Arabic Teacher):** "A student used a dialectal construction that implies possession using a pronoun attached to the noun, common in dialects but less formal in MSA. I responded using the MSA possessive suffix attached to the verb or a preposition, effectively modeling the standard."
6. **(French Teacher):** "A student confused 'il y a' (there is/are) with 'c'est' (it is). I let them finish and then said, 'Ah, so 'there is a book on the table.' In French, for 'there is,' we say 'Il y a.' 'C'est' is more for identifying something.'"
7. **(English Teacher):** "A student said 'I like read books.' I responded, 'Oh, you like reading books! Yes, after 'like,' we often use the -ing form. 'I like reading.'"
8. **(Arabic Teacher):** "A student used a dialectal past tense verb form. I followed up with a sentence using the MSA past tense, 'Then he wrote it,' implicitly modeling the standard."
9. **(French Teacher):** "A student used 'J'ai mangé' (I ate) when describing a past action that continued for a period, where 'J'avais mangé' (I had eaten) might be more precise. I didn't stop them but later introduced the 'plus-que-parfait' tense for prior past actions."
10. **(English Teacher):** "A student used 'He don't have' instead of 'He doesn't have.' I corrected it by saying, 'He *doesn't* have! Good job with the 'have' part, just remember the 's' for 'he.'"
11. **(Arabic Teacher):** "A student used a colloquial interjection in a formal sentence. I simply omitted it in my response, allowing the standard sentence to stand on its own as a model."
12. **(French Teacher):** "A student used 'très chaud' (very hot) for 'It is hot' when the standard would be 'Il fait chaud'. I confirmed their meaning and said, 'Yes, 'Il fait chaud' is how we say it.'"
13. **(English Teacher):** "A student said 'They is happy' instead of 'They are happy.' I responded, 'They *are* happy! Yes, good. 'Are' for 'they' and 'is' for 'he/she/it.'"
14. **(Arabic Teacher):** "A student used a dialectal possessive structure that omits the standard MSA possessive suffix. I responded using the possessive suffix to model it correctly."
15. **(French Teacher):** "A student used a participle form incorrectly. I said, 'Almost there! The past participle here needs to agree with the direct object when it comes before the verb.'"
16. **(English Teacher):** "A student used 'I am forget' instead of 'I forgot' or 'I have forgotten.' I asked, 'Did you forget? Or are you forgetting something now?' to prompt the correct tense."
17. **(Arabic Teacher):** "A student used a colloquial pronunciation for the letter 'ق' (Qaf). I waited for a pause and then said, 'Let's practice that sound: ق' (Qaf) with the emphasis.'"
18. **(French Teacher):** "A student used 'Je suis fatigué' (I am tired) when describing a general state. I confirmed their meaning and offered, 'Yes, *je suis fatigué* is good. We can also say *j'ai de la fatigue* (I have tiredness) depending on nuance.'"
19. **(English Teacher):** "A student used 'This books' instead of 'These books'. I said, 'These books! Yes, plural 'these' for plural 'books.' Good recall!'"
20. **(Arabic Teacher):** "A student used a dialectal word for 'to want' where MSA prefers a different root. I responded using the MSA verb, effectively modeling it."
21. **(French Teacher):** "A student used 'parce que' (because) too often. I introduced alternatives like 'car' or 'puisque' to show variety in formal expression."
22. **(English Teacher):** "A student used 'very bigly' instead of 'very largely' or 'greatly'. I corrected it by offering the standard adverb 'largely' or 'greatly'."
23. **(Arabic Teacher):** "A student used a colloquial phrase that implied a conditional without the standard MSA conditional particle. I responded using the standard particle, 'لو' (law - if)."
24. **(French Teacher):** "A student used 'Tu es gentil' (You are kind) when addressing an elder, where 'Vous êtes gentil' would be more polite. I simply responded with 'vous' when addressing them."

**Q2: What are the biggest challenges you face in teaching the standard variety of your target language, given the linguistic background of your students?**

1. **(English Teacher):** "Students' limited exposure to formal English outside the classroom, making it difficult to internalize correct grammar and pronunciation when media constantly bombards them with informal variants."
2. **(Arabic Teacher):** "The prevalent social attitude that MSA is 'boring' or 'old-fashioned' makes it a struggle to motivate students to master its complexities, as they feel more expressive and 'real' in their dialect."
3. **(French Teacher):** "Pronunciation is a significant challenge. Students often carry over Arabic phonological features, making it difficult for them to produce certain French sounds accurately."
4. **(English Teacher):** "Maintaining student confidence when repeatedly correcting errors, especially with a large class where individual attention is limited."
5. **(Arabic Teacher):** "The vast difference in vocabulary and idiomatic expressions between MSA and students' daily dialects requires extensive explicit teaching."
6. **(French Teacher):** "The abstract nature of grammatical concepts like the subjunctive mood, which require significant cognitive effort to internalize for speakers of languages with different grammatical structures."
7. **(English Teacher):** "Teaching the correct usage of articles ('a', 'an', 'the') and prepositions, which have no direct equivalents or are used differently in Arabic."
8. **(Arabic Teacher):** "Students' perception that MSA is a separate language entirely, rather than a formal register of their own language, leading to resistance in learning it."
9. **(French Teacher):** "Ensuring consistent application of gender and number agreement for adjectives and nouns, as this grammatical feature is less prominent or structured differently in Arabic."
10. **(English Teacher):** "The constant need to re-teach or reinforce basic grammar rules that are often overlooked due to informal L1 or peer group language use."
11. **(Arabic Teacher):** "Making MSA feel relevant and 'alive' for students who primarily use their dialect for all social and emotional expression."
12. **(French Teacher):** "The complexity and frequency of the subjunctive mood and its varied triggers pose a significant challenge for many learners."
13. **(English Teacher):** "Teaching the correct use of English phrasal verbs and idioms, which are highly context-dependent and often culturally specific."
14. **(Arabic Teacher):** "The challenge of ensuring students can produce MSA spontaneously in speech, not just in writing or reading."
15. **(French Teacher):** "Explaining and drilling the correct pronunciation of specific French sounds and intonation patterns that are absent in Arabic."
16. **(English Teacher):** "Students often default to direct translation of Arabic sentence structures, leading to awkward or incorrect English phrasing."
17. **(Arabic Teacher):** "The task of teaching the vast number of MSA verb conjugations and their associated meanings."
18. **(French Teacher):** "The subtlety of formality levels in French, and when to use 'tu' versus 'vous'."
19. **(English Teacher):** "Helping students master the different past tenses in English and when to use each appropriately."
20. **(Arabic Teacher):** "Ensuring students grasp the role of emphatic consonants and other specific Arabic sounds not present in standard English or French."
21. **(French Teacher):** "Teaching the rules of liaison and sentence-linking sounds in spoken French."
22. **(English Teacher):** "Focusing on the correct use of auxiliary verbs ('do,' 'does,' 'did') in questions and negatives."
23. **(Arabic Teacher):** "Making the classical roots of MSA vocabulary accessible and understandable to modern learners."
24. **(French Teacher):** "Teaching the nuances of French adjective placement and agreement."

**Q3: Do you believe there is a role for non-standard varieties in your language classroom? Please explain your reasoning.**

1. **(English Teacher):** "Yes, for demonstrating register. I can show how a more informal phrase is used among friends versus a formal one for an essay."
2. **(Arabic Teacher):** "Yes, to foster a sense of linguistic belonging. When I occasionally use a common dialectal phrase to illustrate a point, students feel more comfortable and engaged."
3. **(French Teacher):** "Yes, for pronunciation awareness. We can analyze the subtle differences in sounds across regions and discuss how it impacts understanding."
4. **(English Teacher):** "Absolutely. It's a chance to discuss language variation itself – how languages change and adapt, making learning more dynamic."
5. **(Arabic Teacher):** "Yes, as a diagnostic tool. It helps me understand where students are struggling with MSA by seeing what they naturally use."
6. **(French Teacher):** "Yes, to build critical thinking skills. Students can analyze why a standard form is preferred in formal settings versus why a dialect is used socially."
7. **(English Teacher):** "Yes, it validates their existing communicative skills and builds confidence before introducing new, standard forms."
8. **(Arabic Teacher):** "Crucial for making MSA feel less like a foreign entity and more like a part of their own linguistic heritage."
9. **(French Teacher):** "Yes, for cultural understanding. It broadens their appreciation for the diversity within the Francophone world."
10. **(English Teacher):** "It helps them understand that language is context-dependent. I can show how informal language is acceptable in some situations but not others."
11. **(Arabic Teacher):** "Yes, as a tool to make MSA grammar concepts more accessible by finding dialectal parallels where they exist."
12. **(French Teacher):** "It demystifies the 'ideal' standard, showing that language is flexible and human."
13. **(English Teacher):** "Yes, for metacognitive awareness. Helping students reflect on their own language use and choices."
14. **(Arabic Teacher):** "It fosters a more respectful classroom, where all their linguistic resources are implicitly valued."
15. **(French Teacher):** "It prepares them for real-world communication where they will encounter many different accents and registers."
16. **(English Teacher):** "Yes, to teach about language change and how dialects are born and evolve."
17. **(Arabic Teacher):** "It's a pedagogical tool to illustrate abstract MSA concepts by relating them to familiar dialectal forms."
18. **(French Teacher):** "Yes, to normalize their own accents and reduce performance anxiety."
19. **(English Teacher):** "It provides authentic examples of language use that can be analyzed for communicative effectiveness."
20. **(Arabic Teacher):** "It validates their current linguistic identity, making the learning of MSA a more welcoming process."
21. **(French Teacher):** "Yes, for comparative analysis: how a concept is expressed in their dialect versus standard French."
22. **(English Teacher):** "It helps students see language not as right/wrong, but as functional and contextual."
23. **(Arabic Teacher):** "Yes, as a means to illustrate the richness and expressiveness of their own dialect, then contrasting it with MSA's formal register."
24. **(French Teacher):** "It makes the language feel more accessible when they can connect standard forms to familiar colloquial ones."

**Q4: What recommendations would you offer for improving teacher preparation in handling linguistic variation in foreign language education?**

1. **(English Teacher):** "More practical training on phonetics and phonology for specific L1 interference patterns common among Egyptian learners of English."
2. **(Arabic Teacher):** "Teacher education should include applied dialectology and sociolinguistics, focusing on practical strategies for integrating dialect in MSA instruction."
3. **(French Teacher):** "More emphasis on the history and diversity of French, providing teachers with knowledge and resources on various regional and global varieties."
4. **(English Teacher):** "Training that explicitly challenges the native-speaker ideal and promotes teaching English as a Lingua Franca (ELF)."
5. **(Arabic Teacher):** "Programs should encourage teachers to view dialects as legitimate communication systems and provide tools to discuss linguistic variation respectfully."
6. **(French Teacher):** "Include modules on French phonetics for Arabic speakers, focusing on common pronunciation challenges."
7. **(English Teacher):** "More workshops on critical language awareness, empowering teachers to discuss language ideologies and societal attitudes towards different varieties."
8. **(Arabic Teacher):** "Provide teachers with clear frameworks and sample lessons for contrastive analysis between MSA and Egyptian dialects."
9. **(French Teacher):** "Offer practical guidance on assessing oral proficiency in a way that is sensitive to diverse accents and backgrounds."
10. **(English Teacher):** "Training on how to teach idiomatic language and phrasal verbs in context, rather than in isolation."
11. **(Arabic Teacher):** "Focus on making MSA feel relevant by connecting it to modern media and student interests."
12. **(French Teacher):** "Provide practical strategies for teaching abstract grammar concepts like the subjunctive mood effectively."
13. **(English Teacher):** "More emphasis on teaching the correct use of articles and prepositions, common problem areas for Arabic speakers."
14. **(Arabic Teacher):** "Teacher training should include explicit instruction on the grammatical differences between MSA and common Egyptian dialects."
15. **(French Teacher):** "Include guidance on teaching French gender and number agreement, with strategies for Arabic L1 speakers."
16. **(English Teacher):** "Develop skills in analyzing L1 interference for common sentence structure and verb tense errors."
17. **(Arabic Teacher):** "Provide teachers with methods to discuss the socio-historical development of Arabic dialects and their relation to MSA."
18. **(French Teacher):** "Offer practical lesson plans for teaching French liaison and enchaînement rules."
19. **(English Teacher):** "Training on teaching register and formality in English for different communicative situations."
20. **(Arabic Teacher):** "More on how to create positive classroom attitudes towards all Arabic dialects while emphasizing MSA's formal role."
21. **(French Teacher):** "Provide teachers with strategies to help students internalize complex French verb conjugations."
22. **(English Teacher):** "Workshops on teaching academic writing skills and English for Specific Purposes (ESP)."
23. **(Arabic Teacher):** "Guidance on teaching Arabic sentence structure and the function of particles."
24. **(French Teacher):** "Focus on teaching polite address forms ('tu' vs. 'vous') and their social implications."

**Q2: What areas of professional development would help you better address linguistic diversity?**

1. **(English Teacher, Secondary, 6 yrs exp.):** "Intercultural communication training to understand how cultural background influences language use and interpretation of 'non-standard' forms."
2. **(Arabic Teacher, Primary, 4 yrs exp.):** "Practical guides on how to use Arabic dialects for teaching MSA vocabulary, specifically focusing on cognates and differences."
3. **(French Teacher, Secondary, 10 yrs exp.):** "Workshops on common errors in French grammar for Arabic speakers, particularly verb tenses and adjective agreement."
4. **(English Teacher, University, 15 yrs exp.):** "Training on translanguaging pedagogy: how to leverage students' entire linguistic repertoire without compromising standard English goals."
5. **(Arabic Teacher, Secondary, 7 yrs exp.):** "More explicit instruction on the grammatical structure of MSA, focusing on aspects absent or different in dialects (e.g., case endings, specific verb forms)."
6. **(French Teacher, Secondary, 12 yrs exp.):** "Practical lesson plans demonstrating how to introduce French regionalisms for cultural context, not just standard forms."
7. **(English Teacher, Primary, 1 yr exp.):** "Basic phonics training for English sounds that are challenging for Arabic speakers (e.g., 'p', 'v', 'th')."
8. **(Arabic Teacher, Secondary, 9 yrs exp.):** "Guidance on teaching formal Arabic discourse markers and transition words."
9. **(French Teacher, University, 18 yrs exp.):** "Advanced training on assessing French pronunciation across diverse learner backgrounds, focusing on intelligibility."
10. **(English Teacher, Secondary, 5 yrs exp.):** "Strategies for teaching English idiomatic expressions and their cultural contexts."
11. **(Arabic Teacher, Secondary, 10 yrs exp.):** "More on the impact of dialect on students' understanding of MSA literary texts."
12. **(French Teacher, Secondary, 8 yrs exp.):** "How to teach politeness conventions in French formal vs. informal address."
13. **(English Teacher, University, 15 yrs exp.):** "Training on teaching academic writing, including citation styles and formal register."
14. **(Arabic Teacher, Preparatory, 4 yrs exp.):** "Guidance on teaching the historical evolution of Arabic dialects and their relation to MSA."
15. **(French Teacher, Secondary, 12 yrs exp.):** "Practical methods for teaching French verb tenses and moods, especially the subjunctive."
16. **(English Teacher, Secondary, 6 yrs exp.):** "More on teaching articles and prepositions, common issues for Arabic speakers."
17. **(Arabic Teacher, Secondary, 7 yrs exp.):** "Workshops on the sociolinguistics of Arabic, explaining the concept of diglossia and its implications for education."
18. **(French Teacher, University, 10 yrs exp.):** "Strategies for teaching French sentence structure and word order, highlighting differences from Arabic."
19. **(English Teacher, Primary, 2 yrs exp.):** "Training on adapting materials to include diverse English-speaking cultures and their language."
20. **(Arabic Teacher, Secondary, 9 yrs exp.):** "How to teach the different Arabic verb conjugation patterns and their meanings."
21. **(French Teacher, Secondary, 15 yrs exp.):** "Focus on teaching French gender and number agreement for nouns and adjectives."
22. **(English Teacher, Secondary, 10 yrs exp.):** "Workshops on teaching English as a Lingua Franca (ELF) and intelligibility."
23. **(Arabic Teacher, Secondary, 5 yrs exp.):** "Guidance on addressing common pronunciation challenges like emphatic consonants in MSA."
24. **(French Teacher, Secondary, 8 yrs exp.):** "Strategies for teaching French modal verbs and their nuances."
25. **(English Teacher, University, 18 yrs exp.):** "Training on teaching discourse markers and connectors in English for coherence."
26. **(Arabic Teacher, Primary, 3 yrs exp.):** "Basic understanding of Arabic phonetics and common dialectal variations."
27. **(French Teacher, Secondary, 12 yrs exp.):** "How to teach French relative pronouns and their functions."
28. **(English Teacher, Secondary, 6 yrs exp.):** "More on teaching idioms and phrasal verbs in context."
29. **(Arabic Teacher, Secondary, 10 yrs exp.):** "Guidance on the nuances of MSA vocabulary that differ from common dialectal usage."
30. **(French Teacher, University, 15 yrs exp.):** "Strategies for teaching the French subjunctive mood effectively."
31. **(English Teacher, Primary, 1 yr exp.):** "Training on addressing L1 interference errors in basic English sentence structure."
32. **(Arabic Teacher, Secondary, 7 yrs exp.):** "How to explain the value of MSA for literature and formal communication."
33. **(French Teacher, Secondary, 8 yrs exp.):** "Practical methods for teaching French negation and question formation."
34. **(English Teacher, Secondary, 10 yrs exp.):** "More on teaching the correct use of articles in English."
35. **(Arabic Teacher, Secondary, 5 yrs exp.):** "Guidance on the rules of Arabic verb conjugation and passive voice."
36. **(French Teacher, University, 18 yrs exp.):** "Strategies for teaching French adjective placement and agreement."
37. **(English Teacher, Secondary, 6 yrs exp.):** "Workshops on teaching formal register and politeness in English."

**Q2: What areas of professional development would help you better address linguistic diversity?**

1. **(English Teacher, Secondary, 4 yrs exp.):** "Strategies for teaching commonly confused vocabulary (e.g., 'affect' vs. 'effect', 'their' vs. 'there')."
2. **(Arabic Teacher, Preparatory, 12 yrs exp.):** "Training on the socio-historical context of MSA and how it evolved, to better explain its presence."
3. **(French Teacher, Secondary, 9 yrs exp.):** "How to teach French idiomatic expressions that might not translate directly from Arabic."
4. **(English Teacher, Primary, 1 yr exp.):** "Understanding basic phonological differences between Arabic and English pronunciation for beginners."
5. **(Arabic Teacher, Secondary, 15 yrs exp.):** "More on teaching the nuances of MSA prepositions and their correct usage."
6. **(French Teacher, University, 8 yrs exp.):** "Strategies for teaching French discourse markers and connectors for better coherence."
7. **(English Teacher, Secondary, 7 yrs exp.):** "How to address common errors in question formation in English for Arabic speakers."
8. **(Arabic Teacher, Secondary, 10 yrs exp.):** "Guidance on teaching the passive voice in MSA and its formal applications."
9. **(French Teacher, Secondary, 13 yrs exp.):** "Workshops on teaching French adverbs and their placement in sentences."
10. **(English Teacher, University, 20+ yrs exp.):** "Training on teaching paraphrasing and summarizing skills for academic English."
11. **(Arabic Teacher, Secondary, 5 yrs exp.):** "More on the impact of L1 diglossia on students' ability to produce fluent MSA speech."
12. **(French Teacher, Secondary, 4 yrs exp.):** "Practical methods for teaching French modal verbs and their meanings."
13. **(English Teacher, Primary, 3 yrs exp.):** "How to introduce English word stress and intonation patterns for Arabic speakers."
14. **(Arabic Teacher, Secondary, 9 yrs exp.):** "Guidance on teaching the nuances of MSA sentence structure and inversion."
15. **(French Teacher, University, 15 yrs exp.):** "Strategies for teaching French relative pronouns and their varied uses."
16. **(English Teacher, Secondary, 11 yrs exp.):** "More on teaching the correct use of English modal verbs."
17. **(Arabic Teacher, Secondary, 6 yrs exp.):** "Workshops on the historical development of Arabic dialects and their relationship to MSA."
18. **(French Teacher, Secondary, 10 yrs exp.):** "How to teach French sentence connectors and cohesive devices."
19. **(English Teacher, University, 18 yrs exp.):** "Training on teaching argumentative writing and essay structure in English."
20. **(Arabic Teacher, Secondary, 4 yrs exp.):** "Guidance on teaching Arabic verb conjugation nuances."
21. **(French Teacher, Secondary, 7 yrs exp.):** "Practical methods for teaching French imperative mood forms."
22. **(English Teacher, Primary, 1 yr exp.):** "Understanding common errors in English comparatives and superlatives for Arabic speakers."
23. **(Arabic Teacher, Secondary, 10 yrs exp.):** "More on teaching the specific sounds of Arabic that are challenging for English learners to differentiate."
24. **(French Teacher, Secondary, 15 yrs exp.):** "Strategies for teaching French possessive adjectives and pronouns."
25. **(English Teacher, Secondary, 7 yrs exp.):** "How to teach the different uses of the gerund and infinitive in English."
26. **(Arabic Teacher, Secondary, 9 yrs exp.):** "Guidance on teaching the role of negation in formal Arabic."
27. **(French Teacher, University, 12 yrs exp.):** "Workshops on teaching French word order, especially with adverbs and objects."
28. **(English Teacher, Secondary, 5 yrs exp.):** "More on teaching the correct usage of tenses for reported speech."
29. **(Arabic Teacher, Preparatory, 4 yrs exp.):** "How to teach Arabic morphology and word formation roots."
30. **(French Teacher, Secondary, 8 yrs exp.):** "Practical methods for teaching French determiners (articles, possessives, etc.)."
31. **(English Teacher, University, 18 yrs exp.):** "Training on teaching coherence and cohesion in English writing."
32. **(Arabic Teacher, Secondary, 10 yrs exp.):** "Guidance on the Arabic root system and its importance for vocabulary acquisition."
33. **(French Teacher, Secondary, 15 yrs exp.):** "Strategies for teaching French interrogative structures."
34. **(English Teacher, Primary, 1 yr exp.):** "How to introduce basic English sentence patterns (SVO) to beginners."
35. **(Arabic Teacher, Secondary, 7 yrs exp.):** "More on teaching the use of Arabic conjunctions and connectors."
36. **(French Teacher, Secondary, 12 yrs exp.):** "Practical methods for teaching common French irregular verbs."
37. **(English Teacher, Secondary, 5 yrs exp.):** "Training on teaching conditional sentences in English."
38. **(Arabic Teacher, Secondary, 9 yrs exp.):** "Guidance on teaching Arabic nominal sentences versus verbal sentences."
39. **(French Teacher, University, 18 yrs exp.):** "Strategies for teaching French synonyms and antonyms in context."
40. **(English Teacher, Secondary, 7 yrs exp.):** "How to teach the concept of 'register' and its importance in English communication."
41. **(Arabic Teacher, Secondary, 10 yrs exp.):** "More on teaching Arabic emphatic consonants and their pronunciation rules."
42. **(French Teacher, Secondary, 8 yrs exp.):** "Practical methods for teaching French negation structures."
43. **(English Teacher, Primary, 1 yr exp.):** "Understanding common errors in English comparatives and superlatives for Arabic speakers."
44. **(Arabic Teacher, Secondary, 10 yrs exp.):** "Guidance on teaching the role of case endings in MSA for grammatical function."
45. **(French Teacher, Secondary, 15 yrs exp.):** "Strategies for teaching French possessive adjectives and pronouns."
46. **(English Teacher, Secondary, 7 yrs exp.):** "How to teach the different uses of the gerund and infinitive in English."
47. **(Arabic Teacher, Secondary, 9 yrs exp.):** "Guidance on teaching the nuances of MSA sentence structure and inversion."
48. **(French Teacher, University, 12 yrs exp.):** "Strategies for teaching French adverb placement."
49. **(English Teacher, Secondary, 5 yrs exp.):** "More on teaching common errors in English verb tense usage."
50. **(Arabic Teacher, Secondary, 10 yrs exp.):** "How to teach MSA's rich system of verb conjugations and derivations."

**Q1: Describe a specific instance where you addressed a non-standard language feature used by a student and how you handled it.**

1. **(English Teacher):** "A student used 'He no like it' instead of 'He doesn't like it'. I responded, 'Ah, he doesn't like it. Yes, that's correct. Remember the 's' for he/she/it?'"
2. **(Arabic Teacher):** "A student used a colloquial demonstrative pronoun. I replied using the MSA demonstrative pronoun, 'Hādhā' (this, masculine) or 'Hādhihi' (this, feminine), subtly modeling the standard."
3. **(French Teacher):** "A student pronounced 'feu' (fire) as 'fow' (similar to English 'how'). I said, 'Good attempt! In French, it's more like 'fuh,' with the tongue in the front of the mouth. Let's try it: 'feu'."
4. **(English Teacher):** "A student said 'It is more big' instead of 'It is bigger.' I affirmed, 'Bigger! Yes, you're right. 'Bigger' already means 'more big,' so we just use 'bigger.'"
5. **(Arabic Teacher):** "A student used a colloquial way of expressing possession with a post-nominal pronoun. I responded using the MSA structure, 'This is *his* book,' rather than 'This book *his*,' modeling the standard word order."
6. **(French Teacher):** "A student said 'Je suis allé' (I went) for an action they just completed, where 'Je viens d'aller' (I have just gone) might be more precise. I said, 'You went! And if you just came back, you'd say 'Je viens d'arriver' (I have just arrived).'"
7. **(English Teacher):** "A student used 'I am forget' instead of 'I forgot.' I gently corrected: 'Oh, you forgot! Yes, the past tense of forget is 'forgot.' So, 'I forgot.'"
8. **(Arabic Teacher):** "A student used a colloquial pronunciation for 'ق' (Qaf). I said, 'That's how we say it in the dialect. In formal Arabic, it's a bit deeper in the throat: ق (Qaf).' Then I practiced the sound with them."
9. **(French Teacher):** "A student pronounced 'pomme' (apple) with a hard 'm' sound at the end. I repeated it correctly, 'pomme,' emphasizing the silent 'e' and the nasal vowel, then asked them to try again."
10. **(English Teacher):** "A student used 'He don't' instead of 'He doesn't.' I replied, 'He doesn't! Good job remembering the 's' rule for he/she/it.'"
11. **(Arabic Teacher):** "A student used a dialectal negation structure. I responded using the MSA negation, 'لم' (lam) or 'لن' (lan) with the jussive verb form, implicitly modeling the standard."
12. **(French Teacher):** "A student confused 'il y a' (there is/are) with 'c'est' (it is). I said, 'Ah, there is a book! So, 'Il y a un livre.' Good try!'"
13. **(English Teacher):** "A student said 'They is happy' instead of 'They are happy.' I responded, 'They *are* happy! Yes, you remembered the plural subject!'"
14. **(Arabic Teacher):** "A student used a colloquial plural form. I replied with the MSA plural, 'So, the books are *here*,' using the MSA form in my sentence."
15. **(French Teacher):** "A student used 'je peux' (I can) where 'je pourrais' (I could) was needed for politeness. I said, 'Yes, you can! And to ask politely, 'Je voudrais' (I would like) is better.'"
16. **(English Teacher):** "A student said 'I am boring' when they meant 'I am bored.' I clarified, 'You feel bored? Or you make others bored? Ah, you feel bored. So, 'I am bored.' That's right!'"
17. **(Arabic Teacher):** "A student used a dialectal verb form. I simply responded with the MSA equivalent in my next sentence, a subtle correction."
18. **(French Teacher):** "A student said 'Il parle français bon' instead of 'Il parle très bien français'. I said, 'Yes, he speaks it well! We can say 'très bien' (very well).'"
19. **(English Teacher):** "A student used 'He have' instead of 'He has.' I said, 'He *has*. Good job remembering the verb part!'"
20. **(Arabic Teacher):** "A student used a colloquial imperative. I responded with the MSA imperative, 'Write!' (Uktub!) clearly and calmly."
21. **(French Teacher):** "A student used 'Je suis d'accord' (I agree) when a more formal affirmation was needed. I offered, 'Yes, you agree. In a more formal setting, one might say 'Je suis tout à fait d'accord' (I completely agree).'"
22. **(English Teacher):** "A student used 'This books' instead of 'These books'. I responded, 'Yes, these books! Plural for plural. Excellent!'"
23. **(Arabic Teacher):** "A student used a dialectal phrase for 'why' when a more formal MSA interrogative was expected. I responded with the MSA version, 'Limaadha?' (Why?), gently modeling it."
24. **(French Teacher):** "A student said 'J'ai 30 ans' (I have 30 years) for their age, which is standard, but I wanted to reinforce the more formal 'J'ai trente ans' when they introduced themselves."

**Q2: What are the biggest challenges you face in teaching the standard variety of your target language, given the linguistic background of your students?**

1. **(English Teacher):** "Students' limited exposure to formal English outside the classroom, making it difficult to internalize correct grammar and pronunciation when media constantly bombards them with informal variants."
2. **(Arabic Teacher):** "The prevalent social attitude that MSA is 'boring' or 'old-fashioned' makes it a struggle to motivate students to master its complexities, as they feel more expressive and 'real' in their dialect."
3. **(French Teacher):** "Pronunciation is a significant challenge. Students often carry over Arabic phonological features, making it difficult for them to produce certain French sounds accurately."
4. **(English Teacher):** "Maintaining student confidence when repeatedly correcting errors, especially with a large class where individual attention is limited."
5. **(Arabic Teacher):** "The sheer difference in vocabulary and verb conjugations between MSA and students' daily dialects is vast. Students have to learn a whole new lexicon and grammatical system, which is very demanding."
6. **(French Teacher):** "The abstract nature of grammatical concepts like the subjunctive mood, which require significant cognitive effort to internalize for speakers of languages with different grammatical structures."
7. **(English Teacher):** "Teaching the correct usage of articles ('a', 'an', 'the') which are often omitted or used differently in Arabic."
8. **(Arabic Teacher):** "Students' resistance to MSA, viewing it as 'artificial' or 'less authentic' than their everyday language."
9. **(French Teacher):** "Ensuring consistent application of gender and number agreement for nouns and adjectives, as this grammatical feature is less prominent or structured differently in Arabic."
10. **(English Teacher):** "The constant need to re-teach or reinforce basic grammar rules that are often overlooked due to informal L1 or peer group language use."
11. **(Arabic Teacher):** "Making MSA feel relevant and 'alive' for students who primarily use their dialect for all social and emotional expression."
12. **(French Teacher):** "The complexity and frequency of the subjunctive mood and its varied triggers pose a significant challenge for many learners."
13. **(English Teacher):** "Teaching the correct use of English phrasal verbs and idioms, which are highly context-dependent and often culturally specific."
14. **(Arabic Teacher):** "The challenge of ensuring students can produce MSA spontaneously in speech, not just in writing or reading."
15. **(French Teacher):** "The correct pronunciation of specific French sounds and intonation patterns that are absent in Arabic."
16. **(English Teacher):** "Students' tendency to default to direct translations from Arabic sentence structures, leading to unidiomatic English phrasing."
17. **(Arabic Teacher):** "The task of teaching the vast number of MSA verb conjugations and their associated meanings."
18. **(French Teacher):** "The subtlety of formality levels in French, and when to use 'tu' versus 'vous'."
19. **(English Teacher):** "Helping students master the different past tenses in English and when to use each appropriately."
20. **(Arabic Teacher):** "Ensuring students grasp the role of emphatic consonants and other specific Arabic sounds not present in standard English or French."
21. **(French Teacher):** "Teaching the rules of liaison and sentence-linking sounds in spoken French."
22. **(English Teacher):** "Focusing on the correct use of auxiliary verbs ('do,' 'does,' 'did') in questions and negatives."
23. **(Arabic Teacher):** "Making the classical roots of MSA vocabulary accessible and understandable to modern learners."
24. **(French Teacher):** "Teaching the nuances of French adjective placement and agreement."
25. **(English Teacher):** "Managing student expectations when they are exposed to so many different English varieties online that may not align with academic standards."
26. **(Arabic Teacher):** "The perception among students that MSA is 'boring' and their preference for the more expressive and familiar dialect."
27. **(French Teacher):** "The difficulty students face with gender agreement, which is a concept they don't habitually apply from Arabic."
28. **(English Teacher):** "The challenge of teaching prepositions correctly, as their usage often differs significantly from Arabic."
29. **(Arabic Teacher):** "Motivating students to memorize and practice the extensive formal vocabulary of MSA."
30. **(French Teacher):** "Ensuring students master the complex system of French verb conjugations across different tenses."
31. **(English Teacher):** "The challenge of teaching the correct use of articles ('a', 'an', 'the') which are frequently omitted or misused."
32. **(Arabic Teacher):** "Helping students internalize the abstract rules of MSA grammar that are not apparent in colloquial speech."
33. **(French Teacher):** "The difficulty in teaching the subjunctive mood, its triggers, and its correct usage."
34. **(English Teacher):** "Balancing the correction of errors with the encouragement of fluency and communication."
35. **(Arabic Teacher):** "Making the formal registers of Arabic feel relevant and 'cool' to teenagers and young adults."
36. **(French Teacher):** "Teaching the correct pronunciation of sounds like the French 'r' and nasal vowels."
37. **(English Teacher):** "The challenge of teaching idiomatic expressions and phrasal verbs whose meanings are not literal."
38. **(Arabic Teacher):** "Ensuring students can produce MSA spontaneously in spoken contexts, not just in written or rote exercises."
39. **(French Teacher):** "Teaching the rules of liaison and enchaînement in spoken French for better flow."
40. **(English Teacher):** "Managing student expectations about achieving 'native-like' fluency versus effective communication."
41. **(Arabic Teacher):** "The perception that MSA is a 'foreign' language rather than a formal register of their own native language."
42. **(French Teacher):** "The consistent need to drill verb conjugations and agreements due to the high frequency of these grammatical features."
43. **(English Teacher):** "Helping students understand the subtle differences in meaning between very similar words or phrases."
44. **(Arabic Teacher):** "The challenge of using authentic MSA materials that are both engaging and linguistically appropriate for their level."

**Q3: Do you believe there is a role for non-standard varieties in your language classroom? Please explain your reasoning.**

1. **(English Teacher):** "Yes, for building rapport and validating students' identities. It makes the classroom feel more human and less intimidating when I acknowledge their existing linguistic assets."
2. **(Arabic Teacher):** "Absolutely. It's vital for creating a bridge to MSA. When students see their dialect acknowledged, they're more open to learning the standard form for formal contexts."
3. **(French Teacher):** "Yes, for cultural awareness and appreciation. Discussing regional accents helps students understand the diversity of the Francophone world and makes them more comfortable with their own potential accents."
4. **(English Teacher):** "Yes, as a tool for teaching register. We can explicitly discuss when informal language is okay and when formal language is required, using their own examples."
5. **(Arabic Teacher):** "Yes, it's essential for motivation. It shows students that their language is respected, which encourages them to engage with MSA more willingly."
6. **(French Teacher):** "Yes, to foster metalinguistic awareness—helping them think about language itself, how it changes, and how different forms are used."
7. **(English Teacher):** "It helps students understand that errors are often just different but functional linguistic systems, not necessarily 'wrong' in all contexts."
8. **(Arabic Teacher):** "Yes, it's a pedagogical asset. I can use dialectal parallels to explain difficult MSA concepts, making them more accessible and memorable."

**Q2: What areas of professional development would help you better address linguistic diversity?**

1. **(English Teacher, Secondary, 5 yrs exp.):** "Training on how to assess oral fluency and accuracy in a way that doesn't over-penalize dialectal variations."
2. **(Arabic Teacher, Primary, 3 yrs exp.):** "More resources on teaching Arabic root words and word families to aid vocabulary acquisition."
3. **(French Teacher, Secondary, 11 yrs exp.):** "How to integrate authentic French cultural content that showcases dialectal differences respectfully."
4. **(English Teacher, University, 16 yrs exp.):** "Workshops on teaching academic English writing conventions, including thesis statements and paragraph structure."
5. **(Arabic Teacher, Secondary, 6 yrs exp.):** "Guidance on teaching Arabic sentence connectors and discourse markers for coherent writing."
6. **(French Teacher, Secondary, 9 yrs exp.):** "Practical methods for teaching French adverbs and their varied placement."
7. **(English Teacher, Primary, 2 yrs exp.):** "Understanding common errors in English verb tense usage, particularly past simple vs. present perfect."
8. **(Arabic Teacher, Secondary, 10 yrs exp.):** "More on teaching the specific phonemes in MSA that differ from common Egyptian dialects."
9. **(French Teacher, University, 12 yrs exp.):** "Strategies for teaching French modal verbs like 'pouvoir,' 'vouloir,' 'devoir' and their nuances."
10. **(English Teacher, Secondary, 7 yrs exp.):** "How to teach indirect speech and the associated tense and pronoun shifts."
11. **(Arabic Teacher, Secondary, 15 yrs exp.):** "Guidance on teaching Arabic sentence structures that rely on verbal roots and derivations."
12. **(French Teacher, Secondary, 8 yrs exp.):** "Workshops on teaching French interrogative structures and word order."
13. **(English Teacher, Primary, 1 yr exp.):** "More on teaching common errors in English plurals and irregular verbs for Arabic speakers."
14. **(Arabic Teacher, Secondary, 10 yrs exp.):** "How to teach the Arabic root system to help students guess vocabulary meanings."
15. **(French Teacher, University, 18 yrs exp.):** "Strategies for teaching French determiners and their agreement rules."
16. **(English Teacher, Secondary, 5 yrs exp.):** "Training on teaching conditional sentences in English (Type 1, 2, 3)."
17. **(Arabic Teacher, Secondary, 7 yrs exp.):** "More on the impact of dialect on students' comprehension of MSA formal registers."
18. **(French Teacher, Secondary, 12 yrs exp.):** "Guidance on teaching French possessive adjectives and pronouns."
19. **(English Teacher, University, 15 yrs exp.):** "Workshops on teaching academic writing, including paragraph coherence and topic sentences."
20. **(Arabic Teacher, Secondary, 9 yrs exp.):** "How to teach the formal rules of Arabic sentence connectors and conjunctions."
21. **(French Teacher, Secondary, 8 yrs exp.):** "Practical methods for teaching French reflexive verbs."
22. **(English Teacher, Primary, 2 yrs exp.):** "Understanding common errors in English auxiliary verbs (do/does/did) for Arabic speakers."
23. **(Arabic Teacher, Secondary, 10 yrs exp.):** "More on teaching the specific phonemes in MSA that differ from common Egyptian dialects."
24. **(French Teacher, Secondary, 15 yrs exp.):** "Strategies for teaching French modal verbs and their nuances."
25. **(English Teacher, Secondary, 7 yrs exp.):** "How to teach indirect speech and the associated tense and pronoun shifts."
26. **(Arabic Teacher, Secondary, 4 yrs exp.):** "Guidance on teaching Arabic verb conjugation patterns and their meanings."
27. **(French Teacher, University, 12 yrs exp.):** "Workshops on teaching French gender and number agreement for nouns and adjectives."
28. **(English Teacher, Secondary, 5 yrs exp.):** "More on teaching the correct usage of articles ('a', 'an', 'the') in English."
29. **(Arabic Teacher, Secondary, 10 yrs exp.):** "How to teach the Arabic root system to help students guess vocabulary meanings."
30. **(French Teacher, Secondary, 8 yrs exp.):** "Practical methods for teaching French negation structures."
31. **(English Teacher, University, 18 yrs exp.):** "Training on teaching coherence and cohesion strategies in English writing."
32. **(Arabic Teacher, Secondary, 7 yrs exp.):** "Guidance on teaching the nuances of MSA sentence structure and inversion."
33. **(French Teacher, Secondary, 12 yrs exp.):** "Strategies for teaching French relative pronouns and their varied uses."
34. **(English Teacher, Primary, 1 yr exp.):** "How to introduce basic English sentence patterns (SVO) to beginners."
35. **(Arabic Teacher, Secondary, 10 yrs exp.):** "More on teaching the specific phonemes in MSA that differ from common Egyptian dialects."
36. **(French Teacher, University, 15 yrs exp.):** "Strategies for teaching French possessive adjectives and pronouns."
37. **(English Teacher, Secondary, 7 yrs exp.):** "How to teach the correct use of English modal verbs and their subtle meaning differences."
38. **(Arabic Teacher, Secondary, 5 yrs exp.):** "Guidance on teaching the nuances of MSA prepositions."
39. **(French Teacher, Secondary, 8 yrs exp.):** "Workshops on teaching French adverb placement."
40. **(English Teacher, University, 18 yrs exp.):** "Training on teaching academic writing conventions in English."
41. **(Arabic Teacher, Secondary, 10 yrs exp.):** "More on teaching the historical development of Arabic dialects and their relation to MSA."
42. **(French Teacher, Secondary, 7 yrs exp.):** "Practical methods for teaching French interrogative structures."
43. **(English Teacher, Primary, 2 yrs exp.):** "Understanding common errors in English comparatives and superlatives."
44. **(Arabic Teacher, Secondary, 9 yrs exp.):** "Guidance on teaching the Arabic root system for vocabulary acquisition."
45. **(French Teacher, Secondary, 12 yrs exp.):** "Strategies for teaching French sentence connectors."
46. **(English Teacher, University, 15 yrs exp.):** "More on teaching the correct use of tenses for reported speech."
47. **(Arabic Teacher, Secondary, 7 yrs exp.):** "How to teach the MSA verb conjugation patterns."
48. **(French Teacher, Secondary, 8 yrs exp.):** "Practical methods for teaching French reflexive verbs."
49. **(English Teacher, Primary, 1 yr exp.):** "How to introduce basic English sentence patterns (SVO)."
50. **(Arabic Teacher, Secondary, 10 yrs exp.):** "More on teaching the sociolinguistics of Arabic dialects in Egypt."

**Q1: Describe a specific instance where you addressed a non-standard language feature used by a student and how you handled it.**

1. **(English Teacher):** "A student used 'I am go' instead of 'I am going.' I responded, 'Ah, you are going now! Or, if it's something you do regularly, you say 'I go.' You're very close!'"
2. **(Arabic Teacher):** "A student used a dialectal phrase meaning 'you all' (plural, informal). I responded using the MSA formal plural, 'أيها الحاضرون' (Ayyuha al-hādhirūn - O attendees), after they finished their thought."
3. **(French Teacher):** "A student pronounced 'heure' (hour) as 'er', dropping the initial 'h'. I said, 'Ah, 'heure'! Remember, in French, the 'h' is silent, so it's more like 'eur.' Let's try it together.'"
4. **(English Teacher):** "A student said 'She don't know' instead of 'She doesn't know.' I affirmed their meaning and then gently corrected, 'Yes, she *doesn't* know. Remember the 's' for 'he, she, it'?'"
5. **(Arabic Teacher):** "A student used a dialectal word for 'to buy.' I responded with the MSA word, 'يشترى' (yashtari), by saying, 'So, he will *buy* it,' subtly modeling the standard term."
6. **(French Teacher):** "A student used 'C'est bon' (It's good) to describe a general action, where 'C'est bien' or 'C'est correct' might be more idiomatic. I rephrased their sentence with the standard idiom, 'Ah, yes, it's good! That's perfectly correct.'"
7. **(English Teacher):** "A student said 'I am interesting' when they meant 'I am interested.' I clarified, 'Ah, so you *feel* interested! If *you* make others interested, then you are interesting. But if you feel that way, it's 'I am interested.'"
8. **(Arabic Teacher):** "A student used a dialectal pronunciation for 'ث' (Tha) as 'س' (Seen). I waited for a pause and then used a word with 'ث' in my own explanation, saying, 'Think of 'ثلاثة' (thalatha - three) – the sound is like 'th' in English.'"
9. **(French Teacher):** "A student pronounced 'deux' (two) as 'dew'. I repeated it correctly, 'Duh,' emphasizing the French vowel sound, and asked them to try again."
10. **(English Teacher):** "A student said 'They has' instead of 'They have.' I replied, 'Yes, *they* have! Good job remembering the plural subject!'"
11. **(Arabic Teacher):** "A student used a dialectal way to express emphasis. I responded with an MSA emphatic phrase, 'حقاً!' (Haqqan! - Truly!) to model the standard usage."
12. **(French Teacher):** "A student used 'Je suis allé' (I went) for a recent past action, where 'Je viens d'aller' (I have just gone) would be more precise. I said, 'You went! And if it just happened, we say 'Je viens d'arriver' (I have just arrived).'"
13. **(English Teacher):** "A student used 'He go' instead of 'He goes.' I responded, 'Yes, he *goes*! Good recall of the 's' for he/she/it.'"
14. **(Arabic Teacher):** "A student used a dialectal verb for 'to search' when MSA prefers a different form. I simply used the MSA verb in my response, 'I searched for it,' modeling the standard."
15. **(French Teacher):** "A student said 'Ce bon' (This good) instead of 'C'est bon' (It's good). I rephrased, 'Ah, *c'est* bon! You are correct in meaning.'"
16. **(English Teacher):** "A student used 'They is happy' instead of 'They are happy.' I said, 'Yes, they *are* happy! Excellent remembering the plural subject.'"
17. **(Arabic Teacher):** "A student used a dialectal possessive construction. I responded with the MSA structure, 'This is *his* book,' modeling the standard possessive suffix."
18. **(French Teacher):** "A student used 'Tu es gentil' inappropriately for a formal context. I simply responded with 'Vous êtes...' (You are... formal) when addressing them."
19. **(English Teacher):** "A student used 'It is more better' instead of 'It is better.' I corrected, 'Better! Yes, 'better' already has 'more' in it. You got the idea!'"
20. **(Arabic Teacher):** "A student used a colloquial imperative. I responded with the MSA imperative, 'Write!' (Uktub!), clearly and calmly."
21. **(French Teacher):** "A student said 'Je parle français bon' instead of 'Je parle très bien français.' I replied, 'Yes, you speak it well! We say 'très bien' (very well).'"
22. **(English Teacher):** "A student used 'I am boring' when they meant 'I am bored.' I clarified, 'Ah, you *feel* bored? Then it's 'I am bored.' Good you understand the meaning!'"
23. **(Arabic Teacher):** "A student used a dialectal negation. I responded using the MSA negation 'لا' (la - no/not) with the appropriate verb form."
24. **(French Teacher):** "A student pronounced 'neuf' (nine) as 'neuf' (new). I said, 'Ah, *neuf* for the number! Let's practice that vowel sound.'"
25. **(English Teacher):** "A student used 'He don't' instead of 'He doesn't.' I responded, 'He *doesn't*! Good memory on the 'have' verb, just remember the 's' for 'he'."
26. **(Arabic Teacher):** "A student used a dialectal demonstrative pronoun. I responded using the MSA demonstrative pronoun 'ذلك' (dhalika - that, masculine) or 'تلك' (tilka - that, feminine)."
27. **(French Teacher):** "A student used 'Je veux' (I want) when politeness required 'Je voudrais' (I would like). I said, 'Yes, you want it! And to ask politely, 'Je voudrais' is best.'"
28. **(English Teacher):** "A student said 'They is happy' instead of 'They are happy.' I replied, 'They *are* happy! Excellent recall of the plural subject.'"
29. **(Arabic Teacher):** "A student used a dialectal possessive suffix. I responded with the MSA suffix structure, 'This is *his* book,' modeling the standard."
30. **(French Teacher):** "A student used 'C'est bon' when describing an action, where 'C'est bien' might be more standard. I said, 'Yes, it is good! Perfectly correct meaning.'"
31. **(English Teacher):** "A student used 'I am boring' when they meant 'I am bored.' I clarified, 'Ah, you *feel* bored? Then it's 'I am bored.' Good, you understand the difference!'"
32. **(Arabic Teacher):** "A student used a dialectal verb for 'to search.' I responded with the MSA verb 'يبحث عن' (yabḥath 'an) in my next sentence."
33. **(French Teacher):** "A student pronounced 'feu' (fire) with an incorrect vowel. I repeated it correctly, 'fuh,' and encouraged them to try."
34. **(English Teacher):** "A student used 'He go' instead of 'He goes.' I said, 'He *goes*! That's right, remember the 's' for he/she/it.'"
35. **(Arabic Teacher):** "A student used a dialectal imperative. I responded with the MSA imperative, 'Write!' (Uktub!), clearly."
36. **(French Teacher):** "A student said 'Je parle français bien' when 'très bien' was more appropriate for the context. I said, 'Yes, you speak it well! 'Très bien' is also very common.'"
37. **(English Teacher):** "A student used 'This books' instead of 'These books'. I said, 'These books! Good recall on the plural.'"
38. **(Arabic Teacher):** "A student used a dialectal demonstrative. I replied using the MSA 'هذا' (hādhā - this) or 'هذه' (hādhihi - this) to model the standard."
39. **(French Teacher):** "A student used 'Je veux' (I want) when 'Je voudrais' (I would like) was needed for politeness. I responded by saying, 'And to ask politely, 'Je voudrais' is best.'"
40. **(English Teacher):** "A student used 'It is more big' instead of 'It is bigger.' I corrected, 'Bigger! Yes, 'bigger' already has 'more' in it. Good try!'"
41. **(Arabic Teacher):** "A student used a dialectal way of expressing emphasis. I responded with an MSA emphatic phrase, 'حقاً!' (Haqqan! - Truly!)"
42. **(French Teacher):** "A student said 'C'est bon' for an action, where 'C'est bien' was more fitting. I replied, 'Ah, yes, *c'est* good! And for an action, 'c'est bien' works too.'"
43. **(English Teacher):** "A student used 'I am interesting' meaning 'I am bored.' I clarified, 'You feel bored? Then 'I am bored.' If you make others bored, then 'I am interesting.'"
44. **(Arabic Teacher):** "A student used a colloquial word for 'to search.' I responded using the MSA verb, 'أبحث عن' (abḥath 'an), in my next sentence."

**Q2: What are the biggest challenges you face in teaching the standard variety of your target language, given the linguistic background of your students?**

1. **(English Teacher):** "The difficulty of conveying the standard pronunciation of 'th' sounds (/θ/, /ð/) for Arabic speakers, who often substitute dental stops or 's'/'z'."
2. **(Arabic Teacher):** "Students' struggle with the Arabic imperative verb forms, especially their variations and context-specific uses in MSA."
3. **(French Teacher):** "The prevalence of informal contractions and elisions in spoken French that students naturally pick up, which are then hard to 'unlearn' for formal contexts."
4. **(English Teacher):** "The nuances of English verb tenses, particularly perfect tenses and their aspectual meanings, which are quite different from Arabic verb structure."
5. **(Arabic Teacher):** "The vast number of sound distinctions in MSA (e.g., emphatic consonants) that are absent in their spoken dialects and challenging to teach."
6. **(French Teacher):** "Students' difficulty in mastering the agreement of past participles with preceding direct objects in compound past tenses."
7. **(English Teacher):** "Teaching the correct usage of prepositions ('in', 'on', 'at', 'for') due to significant differences from Arabic prepositional usage."
8. **(Arabic Teacher):** "The abstract nature of MSA grammatical particles and conjunctions, which require extensive memorization and contextual practice."
9. **(French Teacher):** "Helping students internalize the concept of grammatical gender for nouns and its subsequent agreement with adjectives and articles."
10. **(English Teacher):** "Explaining and drilling the correct use of auxiliary verbs ('do,' 'does,' 'did') in questions and negatives."
11. **(Arabic Teacher):** "The challenge of making students see the practical value of MSA for academic and formal purposes, beyond everyday communication."
12. **(French Teacher):** "Teaching the complex rules of French pronoun placement and usage."
13. **(English Teacher):** "The difficulty of teaching English intonation patterns and stress that differ significantly from Arabic."
14. **(Arabic Teacher):** "Students often confuse MSA vocabulary with dialectal equivalents, or use dialectal terms in formal writing."
15. **(French Teacher):** "The challenge of teaching the subjunctive mood and the varied triggers that necessitate its use."
16. **(English Teacher):** "Students' reliance on informal abbreviations and slang from online communication that are inappropriate for formal settings."
17. **(Arabic Teacher):** "The extensive memorization required for Arabic verb roots, patterns, and derivations."
18. **(French Teacher):** "Teaching the correct pronunciation of nasal vowels and sounds like the French 'r'."
19. **(English Teacher):** "Addressing the frequent errors in adjective placement and agreement in English sentences."
20. **(Arabic Teacher):** "Making the abstract concept of MSA case endings ('i'raab') accessible and practical for learners."
21. **(French Teacher):** "Teaching the appropriate use of formal ('vous') versus informal ('tu') address."
22. **(English Teacher):** "Students' consistent errors with the third-person singular '-s' in the present simple tense."
23. **(Arabic Teacher):** "The challenge of teaching the difference between MSA imperative forms and their dialectal equivalents."
24. **(French Teacher):** "Helping students understand the concept of liaison and enchaînement in spoken French."
25. **(English Teacher):** "Teaching students how to differentiate between 'borrowing' words from their L1 and using appropriate English equivalents."
26. **(Arabic Teacher):** "Motivating students to appreciate the richness and historical depth of MSA literature."
27. **(French Teacher):** "The challenge of teaching French sentence connectors and discourse markers for coherent writing."
28. **(English Teacher):** "Students' tendency to omit auxiliary verbs in questions and negative statements."
29. **(Arabic Teacher):** "Ensuring students can produce correct verb conjugations spontaneously in spoken MSA."
30. **(French Teacher):** "Teaching the correct use of French interrogative words and sentence structures."
31. **(English Teacher):** "Addressing the common confusion between 'say' and 'tell' in reported speech."
32. **(Arabic Teacher):** "Making the rules of Arabic phonology, like assimilation, clear and applicable."
33. **(French Teacher):** "Teaching the correct use of French possessive adjectives and their agreement."
34. **(English Teacher):** "Helping students understand the difference between 'since' and 'for' in expressing time."
35. **(Arabic Teacher):** "Ensuring students grasp the distinction between nominal and verbal sentences in MSA."
36. **(French Teacher):** "The difficulty students have with French adverb placement, which can vary significantly."
37. **(English Teacher):** "Teaching the correct use of articles with abstract nouns."
38. **(Arabic Teacher):** "Making the value of MSA for accessing pan-Arab media and communication clear to students."
39. **(French Teacher):** "Helping students master the polite forms of address and verb agreement."
40. **(English Teacher):** "Addressing the use of slang and informal expressions from popular culture in formal writing."
41. **(Arabic Teacher):** "Ensuring students understand the system of Arabic word roots and derivations for vocabulary building."
42. **(French Teacher):** "Teaching the conditional mood and its various uses."
43. **(English Teacher):** "Making grammar rules feel less like arbitrary regulations and more like tools for effective communication."
44. **(Arabic Teacher):** "The challenge of making MSA feel like a 'living' language, not just a set of rules from a book."

**Q3: Do you believe there is a role for non-standard varieties in your language classroom? Please explain your reasoning.**

1. **(English Teacher):** "Yes, for validating students' existing linguistic resources. It helps them feel more comfortable and engaged when their own language patterns are acknowledged."
2. **(Arabic Teacher):** "Absolutely. It's a crucial bridge. I can use dialectal examples to explain MSA concepts, making them more accessible and reducing the 'foreignness' of MSA."
3. **(French Teacher):** "Yes, for building cultural bridges and fostering respect for diversity. Understanding that French varies regionally enriches their appreciation of the language."
4. **(English Teacher):** "Yes, as a tool for teaching register awareness. We can analyze *when* and *why* certain informal or non-standard features are used."
5. **(Arabic Teacher):** "It's essential for student motivation. Acknowledging their dialect shows respect and can make them more receptive to learning MSA."
6. **(French Teacher):** "Yes, to develop metalinguistic awareness—helping them think critically about language, its variation, and its social positioning."
7. **(English Teacher):** "It helps students understand that 'errors' are often systemic features of a different variety, promoting a more nuanced view of language."
8. **(Arabic Teacher):** "Yes, as a pedagogical asset. I can use dialectal parallels to explain complex MSA grammar points more intuitively."
9. **(French Teacher):** "It demystifies the standard and reduces anxiety about making 'mistakes,' encouraging more speaking practice."
10. **(English Teacher):** "It builds their confidence by showing that their current language skills are a valid starting point, not something to be discarded."
11. **(Arabic Teacher):** "It makes MSA feel 'alive' and connected to their identity, rather than a purely academic subject."
12. **(French Teacher):** "It normalizes accents and can make pronunciation practice less intimidating."
13. **(English Teacher):** "Yes, for error analysis. Understanding the L1 interference behind an error helps target instruction more effectively."
14. **(Arabic Teacher):** "It's vital for identity validation. Acknowledging their dialect shows respect for their background, making them more open to learning MSA."
15. **(French Teacher):** "Yes, for cultural enrichment, exposing them to the diverse ways French is spoken globally."
16. **(English Teacher):** "It promotes critical thinking about language choices and their social implications."
17. **(Arabic Teacher):** "It serves as a natural entry point for explaining linguistic evolution and the relationship between MSA and dialects."
18. **(French Teacher):** "It humanizes the language and demonstrates its dynamic nature."
19. **(English Teacher):** "Yes, to teach about language change and how varieties adapt over time."
20. **(Arabic Teacher):** "It can be a tool for contrastive linguistics, highlighting differences to deepen understanding."
21. **(French Teacher):** "It prepares them for real-world communication where they will encounter many different forms of French."
22. **(English Teacher):** "Yes, to teach pragmatics and sociolinguistic competence effectively."
23. **(Arabic Teacher):** "It validates their existing communicative competence before introducing formal alternatives."
24. **(French Teacher):** "It provides natural examples for discussing register and formality in French."
25. **(English Teacher):** "Yes, to introduce the concept of a linguistic continuum and the social positioning of varieties."
26. **(Arabic Teacher):** "It makes the classroom feel less alienating and more connected to their daily lives."
27. **(French Teacher):** "Yes, to help them understand the sociolinguistic factors behind language variation."
28. **(English Teacher):** "It can be used to discuss slang and informal language in a structured way."
29. **(Arabic Teacher):** "It provides a tangible link between their spoken dialect and the formal MSA structures they need to learn."
30. **(French Teacher):** "Yes, to expose them to regional vocabulary and expressions, enriching their cultural knowledge."
31. **(English Teacher):** "It helps illustrate the concept of 'appropriacy' in language use—when different forms are suitable."
32. **(Arabic Teacher):** "It allows for demonstrating how MSA can enrich dialectal expression and vice versa."
33. **(French Teacher):** "It makes learning less about 'correctness' and more about communicative effectiveness across contexts."
34. **(English Teacher):** "Yes, to discuss the historical relationship between standard and non-standard forms."
35. **(Arabic Teacher):** "It validates their identity as speakers of a living language, fostering a more positive attitude towards formal learning."
36. **(French Teacher):** "It serves as a bridge to understanding nuances in meaning and politeness."
37. **(English Teacher):** "Yes, to show that languages are not static but constantly evolving."
38. **(Arabic Teacher):** "It offers a way to make grammar more relatable by comparing familiar dialectal patterns to MSA rules."
39. **(French Teacher):** "It helps students understand the prestige associated with different language varieties."
40. **(English Teacher):** "Yes, to foster an understanding of language variation as a normal linguistic phenomenon."
41. **(Arabic Teacher):** "It provides a pedagogical advantage by leveraging students' existing linguistic repertoire."
42. **(French Teacher):** "It helps build confidence by starting from what they already know and are comfortable with."
43. **(English Teacher):** "Yes, to discuss the concept of 'language purity' and its limitations."
44. **(Arabic Teacher):** "It can be used to illustrate the process of language standardization and its historical context."
45. **(French Teacher):** "It provides a natural context for teaching formal greetings and polite requests."
46. **(English Teacher):** "Yes, to discuss the sociolinguistic impact of language attitudes on speakers of non-standard varieties."

**Q4: What recommendations would you offer for improving teacher preparation in handling linguistic variation in foreign language education?**

1. **(English Teacher):** "More practical training on phonetics and phonology for specific L1 interference patterns common among Egyptian learners of English."
2. **(Arabic Teacher):** "Dedicated modules on Arabic dialectology and diglossia, with practical strategies for integrating dialect into MSA instruction."
3. **(French Teacher):** "Workshops on the sociolinguistics of French, including regional variations and their perceptions, and how to address them in class."
4. **(English Teacher):** "Challenge the native-speaker ideal; focus on ELF principles, intelligibility, and critical language awareness."
5. **(Arabic Teacher):** "Teacher education should actively destigmatize dialects and equip us with tools to discuss linguistic variation respectfully and pedagogically."
6. **(French Teacher):** "Include more practical training on teaching challenging French grammar, like the subjunctive, considering L1 Arabic background."
7. **(English Teacher):** "Provide resources and strategies for implementing translanguaging and leveraging students' entire linguistic repertoire."
8. **(Arabic Teacher):** "Offer comparative linguistic analysis modules between MSA and Egyptian dialects, focusing on practical teaching applications."
9. **(French Teacher):** "Train teachers on fair assessment methods for oral proficiency, acknowledging diverse accents."
10. **(English Teacher):** "Include training on teaching idiomatic language and phrasal verbs in context."
11. **(Arabic Teacher):** "Guidance on how to make MSA feel relevant and engaging by connecting it to modern media and student interests."
12. **(French Teacher):** "Provide practical methods for teaching abstract grammar concepts like the subjunctive mood effectively."
13. **(English Teacher):** "More focus on teaching articles and prepositions, common error areas for Arabic speakers."
14. **(Arabic Teacher):** "Train teachers on how to address student resistance to MSA by validating their dialectal background."
15. **(French Teacher):** "Focus on practical strategies for teaching French gender and number agreement."
16. **(English Teacher):** "Provide training on teaching formality, politeness, and register in English communication."
17. **(Arabic Teacher):** "Include modules on the historical context of MSA and its development."
18. **(French Teacher):** "Offer practical methods for teaching French pronunciation challenges and common L1 interference."
19. **(English Teacher):** "Train teachers on assessing communicative competence, not just grammatical accuracy."
20. **(Arabic Teacher):** "More emphasis on the socio-historical context of Arabic dialects and their relationship to MSA."
21. **(French Teacher):** "Guidance on teaching French sentence structures and word order variations."
22. **(English Teacher):** "Focus on developing skills in analyzing L1 interference for common errors."
23. **(Arabic Teacher):** "Provide teachers with strategies for teaching MSA vocabulary acquisition effectively."
24. **(French Teacher):** "Training on teaching French modal verbs and their nuances."
25. **(English Teacher):** "More practical sessions on teaching coherence and cohesion in academic writing."
26. **(Arabic Teacher):** "Guidance on teaching the nuances of MSA sentence connectors."
27. **(French Teacher):** "Strategies for teaching French interrogative structures."
28. **(English Teacher):** "How to introduce basic English sentence patterns (SVO) to beginners."
29. **(Arabic Teacher):** "More on teaching the correct usage of Arabic verb conjugations."
30. **(French Teacher):** "Focus on teaching French possessive adjectives and their agreement."
31. **(English Teacher):** "Training on teaching conditional sentences in English."
32. **(Arabic Teacher):** "Guidance on teaching Arabic nominal and verbal sentences."
33. **(French Teacher):** "Strategies for teaching French adverb placement."
34. **(English Teacher):** "More on teaching the correct usage of tenses for reported speech."
35. **(Arabic Teacher):** "How to teach the Arabic root system for vocabulary building."
36. **(French Teacher):** "Practical methods for teaching French negation and question formation."
37. **(English Teacher):** "Understanding common errors in English comparatives and superlatives."
38. **(Arabic Teacher):** "More on the impact of dialect on students' comprehension of MSA literary texts."
39. **(French Teacher):** "Guidance on teaching French liaison and enchaînement."
40. **(English Teacher):** "Training on teaching the concept of register in English."
41. **(Arabic Teacher):** "Focus on making MSA feel relevant to students' lives through modern examples."
42. **(French Teacher):** "Provide teachers with strategies for addressing students' fear of making mistakes."
43. **(English Teacher):** "Workshops on teaching the difference between 'say' and 'tell'."
44. **(Arabic Teacher):** "Guidance on teaching the function of Arabic emphatic consonants."

**Q2: What areas of professional development would help you better address linguistic diversity?**

1. **(English Teacher, Secondary, 8 yrs exp.):** "Training on teaching advanced vocabulary and collocations in English, especially those that are context-specific."
2. **(Arabic Teacher, Preparatory, 5 yrs exp.):** "More on the semantic differences between MSA words and their dialectal counterparts."
3. **(French Teacher, Secondary, 10 yrs exp.):** "How to teach the nuances of French verb tenses and moods beyond the basics, like the passé simple or subjunctive."
4. **(English Teacher, University, 12 yrs exp.):** "Strategies for teaching critical thinking skills through analyzing language use in diverse media."
5. **(Arabic Teacher, Secondary, 7 yrs exp.):** "Guidance on teaching formal Arabic sentence connectors and discourse markers for written cohesion."
6. **(French Teacher, Secondary, 9 yrs exp.):** "Practical methods for teaching French adverbs and their placement, which can be tricky."
7. **(English Teacher, Primary, 3 yrs exp.):** "Understanding common errors in English prepositions for Arabic speakers."
8. **(Arabic Teacher, Secondary, 11 yrs exp.):** "More on teaching Arabic verb roots and derivations to aid vocabulary acquisition."
9. **(French Teacher, University, 15 yrs exp.):** "Strategies for teaching French relative pronouns and their different functions."
10. **(English Teacher, Secondary, 5 yrs exp.):** "How to teach modal verbs correctly and their subtle differences in meaning."
11. **(Arabic Teacher, Secondary, 10 yrs exp.):** "Guidance on teaching the rules of Arabic phonology, like assimilation and elision."
12. **(French Teacher, Secondary, 8 yrs exp.):** "Workshops on teaching French sentence structure and word order."
13. **(English Teacher, Primary, 1 yr exp.):** "More on teaching common errors in English plurals and irregular verbs."
14. **(Arabic Teacher, Secondary, 7 yrs exp.):** "How to teach the MSA verb conjugation patterns and their meanings."
15. **(French Teacher, University, 12 yrs exp.):** "Strategies for teaching French gender and number agreement."
16. **(English Teacher, Secondary, 10 yrs exp.):** "More on teaching the correct use of articles ('a', 'an', 'the')."
17. **(Arabic Teacher, Secondary, 9 yrs exp.):** "Guidance on teaching the historical development of Arabic dialects and their relation to MSA."
18. **(French Teacher, Secondary, 15 yrs exp.):** "Practical methods for teaching French negation structures."
19. **(English Teacher, University, 18 yrs exp.):** "Training on teaching coherence and cohesion in English writing."
20. **(Arabic Teacher, Secondary, 5 yrs exp.):** "More on the impact of dialect on students' comprehension of MSA literary texts."
21. **(French Teacher, Secondary, 8 yrs exp.):** "How to teach French modal verbs and their nuances."
22. **(English Teacher, Primary, 3 yrs exp.):** "Understanding common errors in English comparatives and superlatives."
23. **(Arabic Teacher, Secondary, 10 yrs exp.):** "More on teaching the specific phonemes in MSA that differ from common Egyptian dialects."
24. **(French Teacher, Secondary, 12 yrs exp.):** "Strategies for teaching French possessive adjectives and pronouns."
25. **(English Teacher, Secondary, 7 yrs exp.):** "How to teach the correct use of tenses for reported speech."
26. **(Arabic Teacher, Secondary, 9 yrs exp.):** "Guidance on teaching Arabic sentence structure variations and word order."
27. **(French Teacher, University, 15 yrs exp.):** "Workshops on teaching French interrogative structures."
28. **(English Teacher, Secondary, 5 yrs exp.):** "More on teaching the correct usage of articles ('a', 'an', 'the')."
29. **(Arabic Teacher, Secondary, 10 yrs exp.):** "How to teach the Arabic root system to help students guess vocabulary meanings."
30. **(French Teacher, Secondary, 8 yrs exp.):** "Practical methods for teaching French adverb placement."
31. **(English Teacher, University, 18 yrs exp.):** "Training on teaching coherence and cohesion strategies in English writing."
32. **(Arabic Teacher, Secondary, 7 yrs exp.):** "Guidance on teaching the nuances of MSA sentence structure and inversion."
33. **(French Teacher, Secondary, 12 yrs exp.):** "Strategies for teaching French relative pronouns and their varied uses."
34. **(English Teacher, Primary, 1 yr exp.):** "How to introduce basic English sentence patterns (SVO) to beginners."
35. **(Arabic Teacher, Secondary, 10 yrs exp.):** "More on teaching the specific phonemes in MSA that differ from common Egyptian dialects."
36. **(French Teacher, University, 15 yrs exp.):** "Strategies for teaching French gender and number agreement for nouns and adjectives."
37. **(English Teacher, Secondary, 7 yrs exp.):** "How to teach the correct use of modal verbs in English and their subtle meaning differences."
38. **(Arabic Teacher, Secondary, 5 yrs exp.):** "Guidance on teaching the nuances of MSA prepositions."
39. **(French Teacher, Secondary, 8 yrs exp.):** "Workshops on teaching French sentence connectors and cohesive devices."
40. **(English Teacher, University, 18 yrs exp.):** "Training on teaching argumentative writing and essay structure in English."
41. **(Arabic Teacher, Secondary, 10 yrs exp.):** "More on teaching the historical development of Arabic dialects and their relation to MSA."
42. **(French Teacher, Secondary, 7 yrs exp.):** "Practical methods for teaching French negation structures."
43. **(English Teacher, Primary, 2 yrs exp.):** "Understanding common errors in English comparatives and superlatives for Arabic speakers."
44. **(Arabic Teacher, Secondary, 9 yrs exp.):** "Guidance on teaching the Arabic root system for vocabulary acquisition."
45. **(French Teacher, Secondary, 12 yrs exp.):** "Strategies for teaching French possessive adjectives and pronouns."
46. **(English Teacher, Secondary, 5 yrs exp.):** "Training on teaching conditional sentences in English (Type 1, 2, 3)."
47. **(Arabic Teacher, Secondary, 10 yrs exp.):** "More on teaching the specific phonemes in MSA that differ from common Egyptian dialects."
48. **(French Teacher, University, 15 yrs exp.):** "Strategies for teaching French modal verbs and their nuances."
49. **(English Teacher, Secondary, 7 yrs exp.):** "How to teach indirect speech and the associated tense and pronoun shifts."
50. **(Arabic Teacher, Secondary, 4 yrs exp.):** "Guidance on teaching Arabic verb conjugation patterns and their meanings."

**Q1: Describe a specific instance where you addressed a non-standard language feature used by a student and how you handled it.**

1. **(English Teacher):** "A student used 'I am going' for a habitual action. I responded, 'Ah, you are going *now*! If it's something you do *every day*, we say 'I go.'' It was a simple clarification."
2. **(Arabic Teacher):** "A student used a dialectal demonstrative pronoun when referring to something far. I responded using the MSA 'ذلك' (dhalika - that), then asked them to repeat it."
3. **(French Teacher):** "A student pronounced 'soeur' (sister) like 'sour'. I gently modeled the correct French vowel sound, 'suhr,' and had them repeat it a few times."
4. **(English Teacher):** "A student said 'He no like' instead of 'He doesn't like'. I corrected it by saying, 'He *doesn't* like. Remember the 's' for he/she/it?'"
5. **(Arabic Teacher):** "A student used a dialectal verb for 'to buy' where MSA prefers 'يشتري' (yashtari). I acknowledged their meaning and offered, 'In formal contexts, we often use 'yashtari' here. Let's try it: 'أشتري' (ashtari - I buy).'"
6. **(French Teacher):** "A student used 'C'est bon' to mean something was okay, where a more specific expression might be better. I said, 'Yes, it's good! Or maybe it's 'correct' or 'appropriate' here.'"
7. **(English Teacher):** "A student said 'I am interesting' when they meant 'I am interested.' I clarified, 'Ah, you *feel* interested! That's right. If *you* make others feel interested, *then* you are interesting.'"
8. **(Arabic Teacher):** "A student used a dialectal pronunciation for 'ق' (Qaf). I waited for a natural pause and then demonstrated the correct MSA pronunciation of the sound."
9. **(French Teacher):** "A student pronounced 'feu' (fire) with an incorrect vowel. I repeated it correctly, 'fuh,' and asked them to try again with that sound."
10. **(English Teacher):** "A student said 'They has' instead of 'They have.' I responded, 'Yes, *they* have! Good job remembering the plural subject.'"
11. **(Arabic Teacher):** "A student used a dialectal negation. I responded with the MSA negation, 'لا' (la), in my next sentence."
12. **(French Teacher):** "A student used 'Je veux' (I want) when 'Je voudrais' (I would like) was more polite. I said, 'Yes, you want it! And to ask politely, 'Je voudrais' is better.'"
13. **(English Teacher):** "A student used 'He go' instead of 'He goes.' I said, 'He *goes*! Remember the 's' for he/she/it?'"
14. **(Arabic Teacher):** "A student used a dialectal imperative. I responded with the MSA imperative, 'Write!' (Uktub!) clearly."
15. **(French Teacher):** "A student said 'Je parle français bien' when 'très bien' was more appropriate. I replied, 'Yes, you speak it well! 'Très bien' is also common.'"
16. **(English Teacher):** "A student said 'This books' instead of 'These books'. I responded, 'Yes, *these* books! Plural for plural. Good memory!'"
17. **(Arabic Teacher):** "A student used a dialectal demonstrative pronoun. I replied using the MSA 'هذا' (hādhā - this)."
18. **(French Teacher):** "A student confused 'savoir' and 'connaître'. I used their sentence as an example later in a mini-lesson."
19. **(English Teacher):** "A student used 'I am boring' meaning 'I am bored.' I clarified, 'Ah, you *feel* bored? Then 'I am bored.' Good distinction!'"
20. **(Arabic Teacher):** "A student used a dialectal verb form. I simply responded with the MSA equivalent in my next sentence, modeling it."
21. **(French Teacher):** "A student pronounced 'feu' (fire) with an incorrect vowel. I repeated it correctly, 'fuh,' and asked them to try again."
22. **(English Teacher):** "A student said 'He don't know' instead of 'He doesn't know.' I corrected, 'He *doesn't* know. Remember the 's' rule for he/she/it.'"
23. **(Arabic Teacher):** "A student used a dialectal phrase for 'why.' I responded with the MSA interrogative, 'Limaadha?' (Why?)"
24. **(French Teacher):** "A student used 'Je veux' when 'Je voudrais' was more polite. I said, 'You want it! And to ask politely, 'Je voudrais' is better.'"
25. **(English Teacher):** "A student said 'They is happy' instead of 'They are happy.' I replied, 'They *are* happy! Excellent, you remembered the plural subject.'"
26. **(Arabic Teacher):** "A student used a dialectal possessive construction. I responded using the MSA possessive suffix, 'his book.'"
27. **(French Teacher):** "A student used 'C'est bon' when 'C'est bien' was more appropriate for an action. I said, 'Yes, it's good! Or 'C'est bien' fits here.'"
28. **(English Teacher):** "A student used 'I am boring' when they meant 'I am bored.' I clarified, 'You *feel* bored? Then it's 'I am bored.' Good, you understand the meaning.'"
29. **(Arabic Teacher):** "A student used a dialectal verb. I responded with the MSA equivalent, 'abḥath 'an' (to search)."
30. **(French Teacher):** "A student pronounced 'feu' (fire) with an incorrect vowel. I repeated it correctly, 'fuh,' and asked them to try again."
31. **(English Teacher):** "A student said 'He go' instead of 'He goes.' I corrected, 'He *goes*! Remember the 's' for he/she/it.'"
32. **(Arabic Teacher):** "A student used a dialectal imperative. I responded with the MSA imperative, 'Uktub!' (Write!) clearly."
33. **(French Teacher):** "A student said 'Je parle français bien' when 'très bien' was more appropriate. I replied, 'Yes, you speak it well! 'Très bien' is also common.'"
34. **(English Teacher):** "A student used 'This books' instead of 'These books.' I replied, 'Yes, *these* books! Plural for plural. Good recall!'"
35. **(Arabic Teacher):** "A student used a dialectal demonstrative pronoun. I replied using the MSA 'هذا' (hādhā - this)."
36. **(French Teacher):** "A student confused 'savoir' and 'connaître'. I used their sentence later as an example in a mini-lesson."
37. **(English Teacher):** "A student used 'I am interesting' when they meant 'I am bored.' I clarified, 'You *feel* bored? Then 'I am bored.' Good distinction!'"
38. **(Arabic Teacher):** "A student used a dialectal pronunciation for 'ق' (Qaf). I demonstrated the correct MSA sound, 'Qaf,' during a phonetics review."
39. **(French Teacher):** "A student used 'Je veux' when 'Je voudrais' was more polite. I said, 'You want it! And to ask politely, 'Je voudrais' is better.'"
40. **(English Teacher):** "A student said 'They is happy' instead of 'They are happy.' I replied, 'They *are* happy! Excellent remembering the plural subject.'"
41. **(Arabic Teacher):** "A student used a dialectal possessive construction. I responded with the MSA structure, 'This is *his* book,' modeling the standard."
42. **(French Teacher):** "A student said 'C'est bon' for an action, where 'C'est bien' was more standard. I said, 'Yes, it's good! Or 'C'est bien' works here too.'"
43. **(English Teacher):** "A student used 'I am boring' when they meant 'I am bored.' I clarified, 'You *feel* bored? Then 'I am bored.' Good, you understand the meaning!'"
44. **(Arabic Teacher):** "A student used a dialectal verb. I responded with the MSA equivalent, 'abḥath 'an' (to search), in my next sentence."

**Q2: What are the biggest challenges you face in teaching the standard variety of your target language, given the linguistic background of your students?**

1. **(English Teacher):** "Students' limited exposure to formal English outside the classroom, making it hard to internalize correct grammar and pronunciation when media uses informal variants."
2. **(Arabic Teacher):** "The prevalent social attitude that MSA is 'boring' or 'old-fashioned,' making motivation a struggle compared to their expressive dialects."
3. **(French Teacher):** "Pronunciation is a major challenge, with students often carrying over Arabic phonological features that are difficult to correct."
4. **(English Teacher):** "Maintaining student confidence when repeatedly correcting errors, especially in large classes where individual attention is limited."
5. **(Arabic Teacher):** "The vast difference in vocabulary and verb conjugations between MSA and students' daily dialects requires extensive memorization."
6. **(French Teacher):** "The abstract nature of grammatical concepts like the subjunctive mood, which are challenging for speakers of languages with different structures."
7. **(English Teacher):** "Teaching the correct usage of articles ('a', 'an', 'the') and prepositions, which often don't map directly from Arabic."
8. **(Arabic Teacher):** "Students' resistance to MSA, viewing it as 'artificial' or 'less authentic' than their everyday language."
9. **(French Teacher):** "Ensuring consistent application of gender and number agreement for nouns and adjectives, a concept often less emphasized in Arabic."
10. **(English Teacher):** "The constant need to re-teach basic grammar rules overlooked due to informal L1 or peer group language use."
11. **(Arabic Teacher):** "Making MSA feel relevant and 'alive' for students who primarily use their dialect for social and emotional expression."
12. **(French Teacher):** "The complexity and frequency of the subjunctive mood and its varied triggers pose a significant challenge."
13. **(English Teacher):** "Teaching English idioms and phrasal verbs, which are highly context-dependent and culturally specific."
14. **(Arabic Teacher):** "The challenge of ensuring students can produce MSA spontaneously in speech, not just in writing."
15. **(French Teacher):** "The correct pronunciation of specific French sounds and intonation patterns absent in Arabic."
16. **(English Teacher):** "Students' tendency to default to direct translation of Arabic sentence structures, leading to unidiomatic English."
17. **(Arabic Teacher):** "The task of teaching the vast number of MSA verb conjugations and their associated meanings."
18. **(French Teacher):** "The subtlety of formality levels in French, and when to use 'tu' versus 'vous'."
19. **(English Teacher):** "Helping students master the different past tenses in English and their correct application."
20. **(Arabic Teacher):** "Ensuring students grasp the role of emphatic consonants and other specific Arabic sounds absent in standard English or French."
21. **(French Teacher):** "Teaching the rules of liaison and sentence-linking sounds in spoken French."
22. **(English Teacher):** "Addressing the frequent errors in adjective placement and agreement in English sentences."
23. **(Arabic Teacher):** "Making the abstract concept of MSA case endings ('i'raab') accessible and practical."
24. **(French Teacher):** "The difficulty in teaching the subjunctive mood and its varied triggers."
25. **(English Teacher):** "Managing student expectations when they are exposed to many informal English varieties online."
26. **(Arabic Teacher):** "The perception among students that MSA is 'boring' compared to their expressive dialect."
27. **(French Teacher):** "Students' difficulty in internalizing grammatical gender agreement for nouns."
28. **(English Teacher):** "Teaching the correct usage of prepositions, which differ significantly from Arabic usage."
29. **(Arabic Teacher):** "The sheer volume of MSA vocabulary and formal structures absent in dialects."
30. **(French Teacher):** "Ensuring students master complex French verb conjugations across different tenses."
31. **(English Teacher):** "The challenge of teaching articles ('a', 'an', 'the') correctly."
32. **(Arabic Teacher):** "Making MSA feel relevant and 'alive' for students who primarily use their dialect socially."
33. **(French Teacher):** "Teaching the correct pronunciation of French nasal vowels."
34. **(English Teacher):** "Helping students master idiomatic expressions and phrasal verbs."
35. **(Arabic Teacher):** "Ensuring students can produce MSA spontaneously in spoken contexts."
36. **(French Teacher):** "The correct pronunciation of the French 'r' sound."
37. **(English Teacher):** "Addressing errors in sentence formation due to direct L1 translation."
38. **(Arabic Teacher):** "Making MSA feel less like a foreign language and more like a part of their heritage."
39. **(French Teacher):** "Teaching the concept of 'liaison' and 'enchaînement' in spoken French."
40. **(English Teacher):** "Managing student confidence when repeatedly correcting errors."
41. **(Arabic Teacher):** "The perception that MSA is 'artificial' or 'less authentic' than their dialect."
42. **(French Teacher):** "The challenge of teaching formal vs. informal address ('tu' vs. 'vous')."
43. **(English Teacher):** "Focusing on teaching clarity and intelligibility over native-like accent."
44. **(Arabic Teacher):** "Making the value of MSA for accessing broader cultural and academic resources clear to students."

**Q3: Do you believe there is a role for non-standard varieties in your language classroom? Please explain your reasoning.**

1. **(English Teacher):** "Yes, to discuss register. It helps students understand when informal language is appropriate and when formal language is necessary."
2. **(Arabic Teacher):** "Absolutely. It validates students' existing linguistic identity and can be used as a pedagogical tool to bridge to MSA concepts."
3. **(French Teacher):** "Yes, for cultural appreciation. It exposes students to the diversity within the Francophone world and normalizes their own accents."
4. **(English Teacher):** "Yes, as a tool for error analysis, helping to understand L1 interference rather than just marking errors."
5. **(Arabic Teacher):** "Crucial for motivation. Acknowledging their dialect shows respect and encourages engagement with MSA learning."
6. **(French Teacher):** "Yes, to develop metalinguistic awareness—helping students think about language variation and its social functions."
7. **(English Teacher):** "It helps students understand that 'errors' are often systemic features of a different variety, promoting a more nuanced view of language."
8. **(Arabic Teacher):** "Yes, as a pedagogical asset to make abstract MSA grammar points more accessible through dialectal parallels."
9. **(French Teacher):** "It demystifies the standard, showing that language isn't monolithic and reducing anxiety about 'mistakes'."
10. **(English Teacher):** "It builds their confidence by validating their current linguistic skills as a starting point."
11. **(Arabic Teacher):** "It makes MSA feel 'alive' and connected to their identity, rather than an academic exercise."
12. **(French Teacher):** "It can normalize accents and make pronunciation practice less intimidating."
13. **(English Teacher):** "Yes, for fostering critical thinking about language choices and their social implications."
14. **(Arabic Teacher):** "It provides a pedagogical advantage by leveraging students' existing linguistic repertoire for MSA acquisition."
15. **(French Teacher):** "It helps students appreciate the diversity within the Francophone world, enriching their cultural knowledge."
16. **(English Teacher):** "Yes, to discuss language change and how varieties evolve naturally."
17. **(Arabic Teacher):** "It serves as a bridge to understanding linguistic relativity and the context-dependency of language use."
18. **(French Teacher):** "It humanizes the language, showing it's dynamic and varied, not just rigid rules."
19. **(English Teacher):** "Yes, to teach the concept of 'appropriacy' in language use across different situations."
20. **(Arabic Teacher):** "It allows for demonstrating how MSA can enrich dialectal expression and vice versa."
21. **(French Teacher):** "It prepares them for real-world French where diverse accents and registers are common."
22. **(English Teacher):** "Yes, to discuss slang and informal language found in media."
23. **(Arabic Teacher):** "It provides a tangible link between their spoken dialect and formal MSA structures."
24. **(French Teacher):** "It helps students understand the prestige associated with different language varieties."
25. **(English Teacher):** "Yes, to teach about the social positioning of language varieties."
26. **(Arabic Teacher):** "It validates their existing communicative competence, making them more receptive to formal learning."
27. **(French Teacher):** "Yes, for comparative analysis of grammar and vocabulary between dialect and standard."
28. **(English Teacher):** "It helps explain why certain expressions are considered informal."
29. **(Arabic Teacher):** "It provides a pedagogical shortcut to understanding concepts via dialectal parallels."
30. **(French Teacher):** "It makes the learning process less intimidating by starting with what they know."
31. **(English Teacher):** "Yes, to discuss the historical relationship between standard and non-standard forms."
32. **(Arabic Teacher):** "It fosters a more respectful classroom where their linguistic identity is acknowledged."
33. **(French Teacher):** "It can be used to teach comprehension of different accents and colloquialisms."
34. **(English Teacher):** "Yes, to promote metacognitive awareness about their own language choices."
35. **(Arabic Teacher):** "It makes the learning of MSA feel more accessible and less like a foreign imposition."
36. **(French Teacher):** "It helps students understand that language is not static but constantly evolving."
37. **(English Teacher):** "Yes, to discuss the sociolinguistic impact of language attitudes."
38. **(Arabic Teacher):** "It allows for demonstrating how MSA can enrich dialectal expression."
39. **(French Teacher):** "It prepares them for authentic communication scenarios with diverse speakers."
40. **(English Teacher):** "Yes, to teach the concept of 'appropriacy' in language use."
41. **(Arabic Teacher):** "It provides a pedagogical tool for error analysis, identifying L1 transfer."
42. **(French Teacher):** "It makes the language feel more human and less purely academic."
43. **(English Teacher):** "Yes, to discuss the origins of certain non-standard features."
44. **(Arabic Teacher):** "It creates a more inclusive environment where students feel their linguistic identity is valued."

**Q4: What recommendations would you offer for improving teacher preparation in handling linguistic variation in foreign language education?**

1. **(English Teacher):** "More practical sessions on teaching pronunciation, focusing on intelligibility and common L1 interference from Arabic phonology."
2. **(Arabic Teacher):** "Dedicated courses on Arabic dialectology and sociolinguistics, including comparative grammar modules between MSA and Egyptian dialects."
3. **(French Teacher):** "Training on the history and diversity of French, with practical strategies for teaching regional variations and accents."
4. **(English Teacher):** "Challenge the native-speaker ideal; focus on ELF principles and critical language awareness regarding English varieties."
5. **(Arabic Teacher):** "Programs should equip teachers to challenge linguistic prejudice and provide tools for discussing dialectal variation respectfully."
6. **(French Teacher):** "Include more on teaching abstract grammar like the subjunctive, with specific strategies for Arabic speakers."
7. **(English Teacher):** "Provide resources and training on translanguaging and leveraging students' full linguistic repertoires."
8. **(Arabic Teacher):** "Offer practical comparative linguistic analysis of MSA vs. dialectal Arabic for vocabulary and grammar."
9. **(French Teacher):** "Train teachers on fair assessment methods for oral proficiency that acknowledge diverse accents."
10. **(English Teacher):** "Focus on teaching English idioms and phrasal verbs in context, with cultural relevance."
11. **(Arabic Teacher):** "Guidance on making MSA feel relevant through modern examples and media."
12. **(French Teacher):** "Provide practical methods for teaching French gender/number agreement and verb conjugations."
13. **(English Teacher):** "More focus on teaching articles and prepositions, common difficulties for Arabic speakers."
14. **(Arabic Teacher):** "Train teachers on the socio-historical context of MSA and its development."
15. **(French Teacher):** "Strategies for teaching French sentence structures and common learner errors."
16. **(English Teacher):** "Include modules on teaching formality, politeness, and register in English."
17. **(Arabic Teacher):** "Focus on making MSA feel 'alive' and connected to students' identities."
18. **(French Teacher):** "Provide teachers with practical strategies for teaching French pronunciation challenges."
19. **(English Teacher):** "Training on error analysis to identify L1 interference patterns in English."
20. **(Arabic Teacher):** "Guidance on teaching the Arabic root system for vocabulary acquisition."
21. **(French Teacher):** "More on teaching French modal verbs and their nuances."
22. **(English Teacher):** "Workshops on teaching coherence and cohesion in English academic writing."
23. **(Arabic Teacher):** "How to teach Arabic sentence connectors and discourse markers."
24. **(French Teacher):** "Strategies for teaching French relative pronouns."
25. **(English Teacher):** "More on teaching English verb tenses, particularly the perfect tenses."
26. **(Arabic Teacher):** "Guidance on the rules of Arabic phonology, like assimilation."
27. **(French Teacher):** "Practical methods for teaching French possessive adjectives."
28. **(English Teacher):** "Training on teaching conditional sentences in English."
29. **(Arabic Teacher):** "More on teaching Arabic nominal vs. verbal sentence structures."
30. **(French Teacher):** "Strategies for teaching French adverb placement."
31. **(English Teacher):** "How to teach indirect speech in English."
32. **(Arabic Teacher):** "Guidance on the Arabic root system and its importance for vocabulary."
33. **(French Teacher):** "Workshops on teaching French imperative forms."
34. **(English Teacher):** "More on teaching the correct use of articles in English."
35. **(Arabic Teacher):** "How to explain MSA verb conjugations and their functions."
36. **(French Teacher):** "Strategies for teaching French gender and number agreement."
37. **(English Teacher):** "Training on teaching English idioms and phrasal verbs in context."
38. **(Arabic Teacher):** "Guidance on the socio-historical context of MSA and its development."
39. **(French Teacher):** "More on teaching French sentence connectors."
40. **(English Teacher):** "How to teach the concept of register in English."
41. **(Arabic Teacher):** "Providing teachers with practical methods to discuss dialectal variations constructively."
42. **(French Teacher):** "Training on assessing oral proficiency fairly, considering different accents."
43. **(English Teacher):** "Focus on teaching intelligibility over native-like accent."
44. **(Arabic Teacher):** "Guidance on making MSA feel relevant and engaging for younger learners."

**Q2: What areas of professional development would help you better address linguistic diversity?**

1. **(English Teacher, Secondary, 6 yrs exp.):** "Training on how to use authentic media that feature a wide range of English accents and their cultural contexts."
2. **(Arabic Teacher, Preparatory, 10 yrs exp.):** "More detailed information on the specific phonological differences between Cairene, Sa'idi, and Alexandrian dialects of Arabic."
3. **(French Teacher, University, 12 yrs exp.):** "Workshops on teaching French vocabulary specific to different regions of France and the Francophone world."
4. **(English Teacher, Secondary, 4 yrs exp.):** "Strategies for teaching common errors in English sentence structure resulting from Arabic interference."
5. **(Arabic Teacher, Primary, 5 yrs exp.):** "Guidance on how to introduce MSA script and orthography to students who primarily use Latin script for informal communication (Arabizi)."
6. **(French Teacher, Secondary, 9 yrs exp.):** "Practical methods for teaching French question formation and negation structures clearly."
7. **(English Teacher, University, 16 yrs exp.):** "Training on teaching English discourse markers and cohesive devices for academic writing."
8. **(Arabic Teacher, Secondary, 7 yrs exp.):** "More on the impact of dialect on students' comprehension of MSA literary texts and classical Arabic."
9. **(French Teacher, Secondary, 10 yrs exp.):** "How to teach the nuances of French modal verbs and their implications for politeness."
10. **(English Teacher, Secondary, 8 yrs exp.):** "Strategies for teaching English idioms and phrasal verbs that are culturally specific."
11. **(Arabic Teacher, Preparatory, 15 yrs exp.):** "Guidance on teaching Arabic verb roots and their derivation patterns for vocabulary building."
12. **(French Teacher, University, 12 yrs exp.):** "Workshops on teaching French relative pronouns and their correct usage in various sentence structures."
13. **(English Teacher, Primary, 1 yr exp.):** "Understanding common errors in English comparatives and superlatives for Arabic speakers."
14. **(Arabic Teacher, Secondary, 10 yrs exp.):** "More on teaching the specific phonemes in MSA that differ from common Egyptian dialects."
15. **(French Teacher, Secondary, 8 yrs exp.):** "Practical methods for teaching French adverb placement."
16. **(English Teacher, Secondary, 7 yrs exp.):** "How to teach the correct use of tenses for reported speech in English."
17. **(Arabic Teacher, Secondary, 9 yrs exp.):** "Guidance on teaching Arabic sentence structure variations and word order conventions."
18. **(French Teacher, University, 15 yrs exp.):** "Strategies for teaching French gender and number agreement for nouns and adjectives."
19. **(English Teacher, Secondary, 5 yrs exp.):** "More on teaching the nuances of English modal verbs."
20. **(Arabic Teacher, Primary, 3 yrs exp.):** "Understanding basic Arabic phonetics and common dialectal variations."
21. **(French Teacher, Secondary, 10 yrs exp.):** "How to teach French negation structures and question formation."
22. **(English Teacher, Secondary, 6 yrs exp.):** "Training on teaching English idiomatic expressions and phrasal verbs in context."
23. **(Arabic Teacher, Secondary, 11 yrs exp.):** "Guidance on teaching the historical development of Arabic dialects and their relation to MSA."
24. **(French Teacher, University, 12 yrs exp.):** "Practical methods for teaching French sentence connectors and cohesive devices."
25. **(English Teacher, Secondary, 7 yrs exp.):** "More on teaching the correct use of articles ('a', 'an', 'the') for Arabic speakers."
26. **(Arabic Teacher, Secondary, 9 yrs exp.):** "How to teach the Arabic root system to help students guess vocabulary meanings."
27. **(French Teacher, Secondary, 15 yrs exp.):** "Strategies for teaching French possessive adjectives and pronouns."
28. **(English Teacher, Primary, 1 yr exp.):** "More on teaching common errors in English verb tense usage."
29. **(Arabic Teacher, Secondary, 10 yrs exp.):** "Guidance on teaching the nuances of MSA sentence structure and inversion."
30. **(French Teacher, University, 18 yrs exp.):** "Workshops on teaching French connectors and discourse markers."
31. **(English Teacher, Secondary, 5 yrs exp.):** "How to teach French modal verbs and their nuances."
32. **(Arabic Teacher, Secondary, 7 yrs exp.):** "More on the impact of dialect on students' comprehension of MSA literary texts."
33. **(French Teacher, Secondary, 8 yrs exp.):** "Practical methods for teaching French adverb placement."
34. **(English Teacher, University, 15 yrs exp.):** "Training on teaching academic English writing conventions."
35. **(Arabic Teacher, Secondary, 10 yrs exp.):** "Guidance on teaching the rules of Arabic phonology, like assimilation."
36. **(French Teacher, Secondary, 12 yrs exp.):** "Strategies for teaching French relative pronouns."
37. **(English Teacher, Primary, 2 yrs exp.):** "Understanding common errors in English comparatives and superlatives."
38. **(Arabic Teacher, Secondary, 9 yrs exp.):** "How to teach the Arabic root system for vocabulary acquisition."
39. **(French Teacher, University, 15 yrs exp.):** "More on teaching French gender and number agreement."
40. **(English Teacher, Secondary, 7 yrs exp.):** "Training on teaching the correct use of tenses for reported speech."
41. **(Arabic Teacher, Secondary, 10 yrs exp.):** "Guidance on teaching the nuances of MSA sentence structure and inversion."
42. **(French Teacher, Secondary, 8 yrs exp.):** "Practical methods for teaching French negation structures."
43. **(English Teacher, Primary, 1 yr exp.):** "How to introduce basic English sentence patterns (SVO) to beginners."
44. **(Arabic Teacher, Secondary, 7 yrs exp.):** "More on teaching the MSA verb conjugation patterns and their meanings."
45. **(French Teacher, University, 12 yrs exp.):** "Strategies for teaching French possessive adjectives and pronouns."
46. **(English Teacher, Secondary, 5 yrs exp.):** "Training on teaching conditional sentences in English."
47. **(Arabic Teacher, Secondary, 10 yrs exp.):** "Guidance on teaching the sociolinguistics of Arabic dialects in Egypt."
48. **(French Teacher, Secondary, 8 yrs exp.):** "More on teaching French modal verbs."
49. **(English Teacher, University, 15 yrs exp.):** "Workshops on teaching coherence and cohesion in English writing."
50. **(Arabic Teacher, Secondary, 7 yrs exp.):** "How to teach the Arabic root system for vocabulary building."

**Q1: Describe a specific instance where you addressed a non-standard language feature used by a student and how you handled it.**

1. **(English Teacher):** "A student used 'He no like it' for 'He doesn't like it.' I replied, 'Ah, he *doesn't* like it. Remember the 's' for he/she/it?'"
2. **(Arabic Teacher):** "A student used a dialectal demonstrative pronoun. I responded with the MSA 'هذا' (hādhā - this), subtly modeling the standard."
3. **(French Teacher):** "A student pronounced 'feu' (fire) like 'fow'. I corrected by saying, 'Try 'fuh', with the sound more in the front of your mouth.'"
4. **(English Teacher):** "A student said 'It is more big' instead of 'It is bigger.' I replied, 'Bigger! Yes, 'bigger' already has 'more' in it. Good try!'"
5. **(Arabic Teacher):** "A student used a dialectal possessive structure. I responded using the MSA possessive suffix, 'This is *his* book,' modeling the standard construction."
6. **(French Teacher):** "A student said 'Je veux' (I want) when 'Je voudrais' (I would like) was more polite. I responded, 'You want it! And to ask politely, 'Je voudrais' is better.'"
7. **(English Teacher):** "A student said 'They is happy' instead of 'They are happy.' I replied, 'They *are* happy! Yes, excellent recall on the plural subject.'"
8. **(Arabic Teacher):** "A student used a dialectal pronunciation for 'ق' (Qaf). I demonstrated the correct MSA pronunciation during a review of challenging sounds."
9. **(French Teacher):** "A student used 'C'est bon' to mean 'it's okay', where 'C'est bien' or 'C'est correct' might be more fitting. I rephrased, 'Yes, it's good! Or 'C'est bien' works here too.'"
10. **(English Teacher):** "A student said 'I am boring' when they meant 'I am bored.' I clarified, 'Ah, you *feel* bored? Then 'I am bored.' Good distinction!'"
11. **(Arabic Teacher):** "A student used a dialectal negation. I responded with the MSA negation 'لا' (la) with the correct verb form."
12. **(French Teacher):** "A student pronounced 'feu' (fire) with an incorrect vowel sound. I repeated it correctly, 'fuh,' and encouraged them to try again."
13. **(English Teacher):** "A student said 'He go' instead of 'He goes.' I corrected, 'He *goes*! Remember the 's' for he/she/it.'"
14. **(Arabic Teacher):** "A student used a dialectal verb for 'to buy.' I responded using the MSA verb, 'yashtari,' in my next sentence."
15. **(French Teacher):** "A student used 'Je suis allé' (I went) for an action that just happened, where 'Je viens d'aller' (I have just gone) is more precise. I said, 'You went! And if it just happened, 'Je viens d'arriver' (I have just arrived).'"
16. **(English Teacher):** "A student used 'I am interesting' when they meant 'I am interested.' I clarified, 'Ah, you *feel* interested? Then 'I am interested.' Good!'"
17. **(Arabic Teacher):** "A student used a dialectal phrase for 'why.' I responded using the MSA interrogative, 'Limaadha?' (Why?)"
18. **(French Teacher):** "A student said 'Je parle français bien' when 'très bien' was more appropriate for a formal context. I replied, 'Yes, you speak it well! 'Très bien' is also common.'"
19. **(English Teacher):** "A student said 'They is happy' instead of 'They are happy.' I replied, 'They *are* happy! Excellent recall on the plural subject.'"
20. **(Arabic Teacher):** "A student used a dialectal possessive construction. I responded with the MSA structure, 'This is *his* book,' modeling the standard."
21. **(French Teacher):** "A student used 'C'est bon' when 'C'est bien' was more fitting for an action. I said, 'Yes, it's good! Or 'C'est bien' works here too.'"
22. **(English Teacher):** "A student used 'He don't' instead of 'He doesn't.' I corrected, 'He *doesn't*! Remember the 's' rule for he/she/it.'"
23. **(Arabic Teacher):** "A student used a dialectal negation. I responded with the MSA negation 'لا' (la) with the correct verb form."
24. **(French Teacher):** "A student used 'Je veux' (I want) when 'Je voudrais' (I would like) was more polite. I said, 'You want it! And to ask politely, 'Je voudrais' is better.'"
25. **(English Teacher):** "A student used 'I am boring' when they meant 'I am bored.' I clarified, 'Ah, you *feel* bored? Then 'I am bored.' Good distinction!'"
26. **(Arabic Teacher):** "A student used a dialectal verb. I responded with the MSA equivalent, 'abḥath 'an' (to search), in my next sentence."
27. **(French Teacher):** "A student pronounced 'feu' (fire) with an incorrect vowel. I repeated it correctly, 'fuh,' and asked them to try again."
28. **(English Teacher):** "A student said 'He go' instead of 'He goes.' I corrected, 'He *goes*! Remember the 's' for he/she/it.'"
29. **(Arabic Teacher):** "A student used a dialectal imperative. I responded with the MSA imperative, 'Uktub!' (Write!) clearly."
30. **(French Teacher):** "A student said 'Je parle français bien' when 'très bien' was more appropriate for a formal context. I replied, 'Yes, you speak it well! 'Très bien' is also common.'"
31. **(English Teacher):** "A student said 'They is happy' instead of 'They are happy.' I replied, 'They *are* happy! Excellent recall on the plural subject.'"
32. **(Arabic Teacher):** "A student used a dialectal possessive construction. I responded with the MSA structure, 'This is *his* book,' modeling the standard construction."
33. **(French Teacher):** "A student said 'C'est bon' when 'C'est bien' was more fitting for an action. I said, 'Yes, it's good! Or 'C'est bien' works here too.'"
34. **(English Teacher):** "A student used 'I am boring' when they meant 'I am bored.' I clarified, 'Ah, you *feel* bored? Then 'I am bored.' Good, you understand the meaning.'"
35. **(Arabic Teacher):** "A student used a dialectal phrase for 'why.' I responded using the MSA interrogative, 'Limaadha?' (Why?)"
36. **(French Teacher):** "A student used 'Je veux' (I want) when 'Je voudrais' (I would like) was more polite. I said, 'You want it! And to ask politely, 'Je voudrais' is better.'"
37. **(English Teacher):** "A student used 'This books' instead of 'These books.' I replied, 'Yes, *these* books! Plural for plural. Good memory!'"
38. **(Arabic Teacher):** "A student used a dialectal verb for 'to buy.' I responded with the MSA verb, 'yashtari,' in my next sentence."
39. **(French Teacher):** "A student said 'Je suis allé' (I went) for an action that just happened, where 'Je viens d'aller' (I have just gone) is more precise. I said, 'You went! And if it just happened, 'Je viens d'arriver' (I have just arrived).'"
40. **(English Teacher):** "A student used 'He go' instead of 'He goes.' I corrected, 'He *goes*! Remember the 's' for he/she/it.'"
41. **(Arabic Teacher):** "A student used a dialectal imperative. I responded with the MSA imperative, 'Uktub!' (Write!) clearly."
42. **(French Teacher):** "A student said 'Je parle français bien' when 'très bien' was more appropriate for a formal context. I replied, 'Yes, you speak it well! 'Très bien' is also common.'"
43. **(English Teacher):** "A student said 'They is happy' instead of 'They are happy.' I replied, 'They *are* happy! Excellent recall on the plural subject.'"
44. **(Arabic Teacher):** "A student used a dialectal possessive construction. I responded with the MSA structure, 'This is *his* book,' modeling the standard construction."

**Q2: What are the biggest challenges you face in teaching the standard variety of your target language, given the linguistic background of your students?**

1. **(English Teacher):** "Students' limited exposure to formal English outside the classroom, making it hard to internalize correct grammar and pronunciation when media uses informal variants."
2. **(Arabic Teacher):** "The prevalent social attitude that MSA is 'boring' or 'old-fashioned,' making motivation a struggle compared to their expressive dialects."
3. **(French Teacher):** "Pronunciation is a significant challenge. Students often carry over Arabic phonological features, making it difficult for them to produce certain French sounds accurately."
4. **(English Teacher):** "Maintaining student confidence when repeatedly correcting errors, especially in large classes where individual attention is limited."
5. **(Arabic Teacher):** "The sheer difference in vocabulary and verb conjugations between MSA and students' daily dialects requires extensive explicit teaching."
6. **(French Teacher):** "The abstract nature of grammatical concepts like the subjunctive mood, which are challenging for speakers of languages with different structures."
7. **(English Teacher):** "Teaching the correct usage of articles ('a', 'an', 'the') which are often omitted or used differently in Arabic."
8. **(Arabic Teacher):** "Students' resistance to MSA, viewing it as 'artificial' or 'less authentic' than their everyday language."
9. **(French Teacher):** "Ensuring consistent application of gender and number agreement for nouns and adjectives, a concept often less emphasized in Arabic."
10. **(English Teacher):** "The constant need to re-teach or reinforce basic grammar rules that are often overlooked due to informal L1 or peer group language use."
11. **(Arabic Teacher):** "Making MSA feel relevant and 'alive' for students who primarily use their dialect for social and emotional expression."
12. **(French Teacher):** "The complexity and frequency of the subjunctive mood and its varied triggers pose a significant challenge for many learners."
13. **(English Teacher):** "Teaching English idioms and phrasal verbs, which are highly context-dependent and often culturally specific."
14. **(Arabic Teacher):** "The challenge of ensuring students can produce MSA spontaneously in speech, not just in writing."
15. **(French Teacher):** "The correct pronunciation of specific French sounds and intonation patterns absent in Arabic."
16. **(English Teacher):** "Students' tendency to default to direct translations from Arabic sentence structures, leading to unidiomatic English phrasing."
17. **(Arabic Teacher):** "The task of teaching the vast number of MSA verb conjugations and their associated meanings."
18. **(French Teacher):** "The subtlety of formality levels in French, and when to use 'tu' versus 'vous'."
19. **(English Teacher):** "Helping students master the different past tenses in English and their correct application."
20. **(Arabic Teacher):** "Ensuring students grasp the role of emphatic consonants and other specific Arabic sounds not present in standard English or French."
21. **(French Teacher):** "Teaching the rules of liaison and sentence-linking sounds in spoken French."
22. **(English Teacher):** "Focusing on the correct use of auxiliary verbs ('do,' 'does,' 'did') in questions and negatives."
23. **(Arabic Teacher):** "Making the classical roots of MSA vocabulary accessible and understandable to modern learners."
24. **(French Teacher):** "Teaching the nuances of French adjective placement and agreement."
25. **(English Teacher):** "Managing student expectations when they are exposed to many different English varieties online that may not align with academic standards."
26. **(Arabic Teacher):** "The perception among students that MSA is 'boring' compared to their expressive dialect."
27. **(French Teacher):** "Students' difficulty in internalizing grammatical gender agreement for nouns."
28. **(English Teacher):** "Teaching the correct usage of prepositions, which often don't map directly from Arabic."
29. **(Arabic Teacher):** "The sheer volume of MSA vocabulary and formal structures absent in dialects."
30. **(French Teacher):** "Ensuring students master the complex system of French verb conjugations across different tenses."
31. **(English Teacher):** "The challenge of teaching articles ('a', 'an', 'the') correctly."
32. **(Arabic Teacher):** "Making MSA feel relevant and 'alive' for students who primarily use their dialect for social and emotional expression."
33. **(French Teacher):** "The difficulty in teaching the subjunctive mood and its varied triggers."
34. **(English Teacher):** "Balancing the correction of errors with the encouragement of fluency and communication."
35. **(Arabic Teacher):** "The perception that MSA is 'artificial' or 'less authentic' than their everyday language."
36. **(French Teacher):** "Ensuring consistent application of gender and number agreement for nouns and adjectives."
37. **(English Teacher):** "The constant need to re-teach basic grammar rules overlooked due to informal L1 or peer group language use."
38. **(Arabic Teacher):** "Making the value of MSA for accessing broader cultural and academic resources clear to students."
39. **(French Teacher):** "Providing teachers with practical methods for teaching French pronunciation challenges like specific vowels and nasal sounds."
40. **(English Teacher):** "Training on teaching coherence and cohesion strategies in English academic writing."
41. **(Arabic Teacher):** "Guidance on teaching the nuances of MSA sentence structure and inversion."
42. **(French Teacher):** "Strategies for teaching French relative pronouns and their varied uses."
43. **(English Teacher):** "More on teaching the correct use of modal verbs in English and their subtle meaning differences."
44. **(Arabic Teacher):** "How to teach the Arabic root system to help students guess vocabulary meanings."

**Q3: Do you believe there is a role for non-standard varieties in your language classroom? Please explain your reasoning.**

1. **(English Teacher):** "Yes, for building rapport and validating students' identities. It makes the classroom feel more human and less intimidating."
2. **(Arabic Teacher):** "Absolutely. It's a crucial bridge. I can use dialectal examples to explain MSA concepts, making them more accessible and reducing the 'foreignness' of MSA."
3. **(French Teacher):** "Yes, for cultural context and to normalize accents. Understanding that French varies regionally helps students appreciate diversity."
4. **(English Teacher):** "Yes, as a tool for teaching register. We can analyze *when* and *why* certain informal features are used."
5. **(Arabic Teacher):** "It's essential for motivation. Acknowledging their dialect shows respect and encourages engagement with MSA learning."
6. **(French Teacher):** "Yes, to develop metalinguistic awareness—helping them think about language variation and its social functions."
7. **(English Teacher):** "It helps students understand that 'errors' are often systemic features of a different variety, promoting a more nuanced view of language."
8. **(Arabic Teacher):** "Yes, as a pedagogical asset. I can use dialectal parallels to explain complex MSA grammar points more intuitively."
9. **(French Teacher):** "It demystifies the standard and reduces anxiety about 'mistakes,' encouraging more speaking practice."
10. **(English Teacher):** "It builds their confidence by showing that their current language skills are a valid starting point."
11. **(Arabic Teacher):** "It makes MSA feel 'alive' and connected to their identity, rather than an academic exercise."
12. **(French Teacher):** "It normalizes accents and can make pronunciation practice less intimidating."
13. **(English Teacher):** "Yes, for error analysis. Understanding the L1 interference behind an error helps target instruction more effectively."
14. **(Arabic Teacher):** "It's crucial for identity validation. Acknowledging their dialect shows respect for their background."
15. **(French Teacher):** "Yes, for cultural enrichment, showing the diverse ways French is spoken globally."
16. **(English Teacher):** "It helps students understand that language choices are context-dependent."
17. **(Arabic Teacher):** "Yes, as a tool to make MSA more accessible by finding dialectal parallels."
18. **(French Teacher):** "It shows them that language isn't just static rules but a living, evolving entity."
19. **(English Teacher):** "Yes, to discuss language change and the natural evolution of varieties."
20. **(Arabic Teacher):** "It serves as a practical tool for comparative linguistics, highlighting differences for better retention."
21. **(French Teacher):** "It prepares them for real-world French where diverse accents and registers are common."
22. **(English Teacher):** "Yes, to teach pragmatics and sociolinguistic competence."
23. **(Arabic Teacher):** "It validates their existing communicative competence, making them more receptive to formal learning."
24. **(French Teacher):** "It provides natural examples for teaching register and formality in French."
25. **(English Teacher):** "Yes, to introduce the concept of a linguistic continuum and the social positioning of varieties."
26. **(Arabic Teacher):** "It makes the classroom feel less alienating and more connected to their daily lives."
27. **(French Teacher):** "Yes, to help them understand the sociolinguistic factors behind language variation."
28. **(English Teacher):** "It can be used to discuss slang and informal language in a structured way."
29. **(Arabic Teacher):** "It provides a tangible link between their spoken dialect and formal MSA structures they need to learn."
30. **(French Teacher):** "Yes, to expose them to regional vocabulary and expressions, enriching their cultural knowledge."
31. **(English Teacher):** "It helps students see language not as right/wrong, but as functional and contextual."
32. **(Arabic Teacher):** "It validates their identity as speakers of a living language, fostering a positive attitude towards formal learning."
33. **(French Teacher):** "It provides a pedagogical advantage by leveraging students' existing linguistic repertoire."
34. **(English Teacher):** "Yes, to discuss the historical relationship between standard and non-standard forms."
35. **(Arabic Teacher):** "It allows for demonstrating how MSA can enrich dialectal expression and vice versa."
36. **(French Teacher):** "It makes the learning process less intimidating by starting with what they already know and are comfortable with."
37. **(English Teacher):** "Yes, to discuss the concept of 'language purity' and its limitations."
38. **(Arabic Teacher):** "It provides a pedagogical tool for error analysis, identifying L1 transfer."
39. **(French Teacher):** "It helps students understand that language is not static but constantly evolving."
40. **(English Teacher):** "Yes, to discuss the sociolinguistic impact of language attitudes on speakers of non-standard varieties."
41. **(Arabic Teacher):** "It serves as a bridge to understanding linguistic relativity and the context-dependency of language use."
42. **(French Teacher):** "It makes the language feel more accessible when they can connect standard forms to familiar colloquial ones."
43. **(English Teacher):** "Yes, to teach about language change and how varieties adapt over time."
44. **(Arabic Teacher):** "It validates their existing communicative competence, making them more receptive to formal learning."

**Q4: What recommendations would you offer for improving teacher preparation in handling linguistic variation in foreign language education?**

1. **(English Teacher):** "More practical training on phonetics and phonology specifically for Arabic speakers learning English, focusing on common sound substitutions."
2. **(Arabic Teacher):** "Dedicated modules on Arabic dialectology and diglossia, including comparative linguistic analysis of MSA and Egyptian dialects."
3. **(French Teacher):** "Workshops on the sociolinguistics of French, focusing on regional variations, their social perceptions, and how to teach them."
4. **(English Teacher):** "Teacher training should challenge the native-speaker ideal and promote teaching English as a Lingua Franca (ELF), focusing on intelligibility."
5. **(Arabic Teacher):** "Programs should equip teachers to destigmatize dialects and provide practical strategies for integrating colloquial Arabic into MSA instruction."
6. **(French Teacher):** "Include more on teaching abstract grammar concepts like the subjunctive mood, with specific strategies for Arabic L1 speakers."
7. **(English Teacher):** "Provide resources and training on translanguaging pedagogy and leveraging students' entire linguistic repertoire."
8. **(Arabic Teacher):** "Offer comparative analysis of MSA and dialectal Arabic grammar and vocabulary, with practical teaching applications."
9. **(French Teacher):** "Train teachers on fair assessment methods for oral proficiency that acknowledge diverse accents and backgrounds."
10. **(English Teacher):** "Focus on teaching English idioms and phrasal verbs in context, emphasizing cultural relevance."
11. **(Arabic Teacher):** "Guidance on making MSA feel relevant to students by connecting it to modern media and their interests."
12. **(French Teacher):** "Provide practical methods for teaching French gender and number agreement, a common challenge."
13. **(English Teacher):** "More focus on teaching the correct usage of articles ('a', 'an', 'the') and prepositions for Arabic speakers."
14. **(Arabic Teacher):** "Train teachers on the socio-historical context of MSA and its development."
15. **(French Teacher):** "Strategies for teaching French sentence structure and common learner errors."
16. **(English Teacher):** "More on teaching the nuances of English modal verbs."
17. **(Arabic Teacher):** "Guidance on teaching the Arabic root system for vocabulary acquisition."
18. **(French Teacher):** "Practical methods for teaching French negation and question formation."
19. **(English Teacher):** "Training on teaching coherence and cohesion in English academic writing."
20. **(Arabic Teacher):** "More on teaching the specific phonemes in MSA that differ from common Egyptian dialects."
21. **(French Teacher):** "Strategies for teaching French possessive adjectives and pronouns."
22. **(English Teacher):** "How to teach the correct use of tenses for reported speech in English."
23. **(Arabic Teacher):** "Guidance on teaching Arabic sentence structure variations and word order conventions."
24. **(French Teacher):** "Workshops on teaching French connectors and discourse markers for coherent writing."
25. **(English Teacher):** "More on teaching the nuances of French modal verbs."
26. **(Arabic Teacher):** "Focus on making MSA feel relevant to students' lives through modern examples."
27. **(French Teacher):** "Training on teaching French pronunciation challenges like specific vowels and nasal sounds."
28. **(English Teacher):** "Strategies for teaching common errors in English comparatives and superlatives."
29. **(Arabic Teacher):** "More on teaching the impact of dialect on students' comprehension of MSA literary texts."
30. **(French Teacher):** "Guidance on teaching French verb conjugation patterns and their meanings."
31. **(English Teacher):** "How to teach the Arabic root system to help students guess vocabulary meanings."
32. **(Arabic Teacher):** "More on teaching the specific phonemes in MSA that differ from common Egyptian dialects."
33. **(French Teacher):** "Practical methods for teaching French adverb placement."
34. **(English Teacher):** "Training on teaching coherence and cohesion strategies in English academic writing."
35. **(Arabic Teacher):** "Guidance on teaching the nuances of MSA sentence structure and inversion."
36. **(French Teacher):** "Strategies for teaching French relative pronouns and their varied uses."
37. **(English Teacher):** "More on teaching the correct use of articles ('a', 'an', 'the') for Arabic speakers."
38. **(Arabic Teacher):** "How to teach the Arabic root system for vocabulary acquisition."
39. **(French Teacher):** "Practical methods for teaching French negation structures."
40. **(English Teacher):** "Training on teaching the correct use of tenses for reported speech."
41. **(Arabic Teacher):** "More on teaching the specific phonemes in MSA that differ from common Egyptian dialects."
42. **(French Teacher):** "Strategies for teaching French gender and number agreement for nouns and adjectives."
43. **(English Teacher):** "How to teach English idioms and phrasal verbs in context."
44. **(Arabic Teacher):** "Guidance on making MSA feel relevant and engaging for younger learners."

Okay, here are 50 more *hypothetical* responses to the open-ended questions, designed to offer further variety in pedagogical challenges, attitudes, and professional development needs.

**Hypothetical Responses to Open-Ended Questions (LVECQ - Section 3) - Set 10 (50 Responses)**

**Q2: What areas of professional development would help you better address linguistic diversity?**

1. **(English Teacher, Secondary, 6 yrs exp.):** "Training on assessing speaking proficiency in a way that distinguishes dialectal variation from actual errors."
2. **(Arabic Teacher, Preparatory, 10 yrs exp.):** "More on the sociolinguistic impact of MSA vs. dialectal Arabic on students' self-identity and academic performance."
3. **(French Teacher, University, 15 yrs exp.):** "Workshops on teaching advanced French vocabulary and idiomatic expressions suitable for academic contexts."
4. **(English Teacher, Secondary, 4 yrs exp.):** "Strategies for teaching English phrasal verbs and their contextual meanings."
5. **(Arabic Teacher, Primary, 5 yrs exp.):** "Guidance on using comparative linguistics to illustrate differences between dialect and MSA grammar, making it less abstract."
6. **(French Teacher, Secondary, 9 yrs exp.):** "Practical methods for teaching French formal writing conventions and essay structures."
7. **(English Teacher, University, 16 yrs exp.):** "Training on teaching paraphrasing and summarizing skills effectively for academic English."
8. **(Arabic Teacher, Secondary, 7 yrs exp.):** "More on the impact of dialect on students' understanding of MSA formal registers and literary texts."
9. **(French Teacher, Secondary, 10 yrs exp.):** "How to teach the nuances of French modal verbs and their varied implications for politeness and tone."
10. **(English Teacher, Secondary, 8 yrs exp.):** "Strategies for teaching English idioms and phrasal verbs that are culturally specific."
11. **(Arabic Teacher, Preparatory, 4 yrs exp.):** "Guidance on teaching Arabic verb roots and their derivation patterns for vocabulary acquisition."
12. **(French Teacher, Secondary, 12 yrs exp.):** "Workshops on teaching French relative pronouns and their correct usage in various sentence structures."
13. **(English Teacher, Primary, 1 yr exp.):** "Understanding common errors in English comparatives and superlatives for Arabic speakers."
14. **(Arabic Teacher, Secondary, 10 yrs exp.):** "More on teaching the specific phonemes in MSA that differ from common Egyptian dialects."
15. **(French Teacher, University, 15 yrs exp.):** "Strategies for teaching French adverb placement, which can be tricky."
16. **(English Teacher, Secondary, 7 yrs exp.):** "How to teach the correct use of tenses for reported speech in English."
17. **(Arabic Teacher, Secondary, 9 yrs exp.):** "Guidance on teaching Arabic sentence structure variations and word order conventions."
18. **(French Teacher, Secondary, 8 yrs exp.):** "Practical methods for teaching French negation structures."
19. **(English Teacher, University, 18 yrs exp.):** "Training on teaching coherence and cohesion strategies in English academic writing."
20. **(Arabic Teacher, Secondary, 5 yrs exp.):** "More on the impact of dialect on students' comprehension of MSA formal registers."
21. **(French Teacher, Secondary, 10 yrs exp.):** "How to teach the nuances of French modal verbs and their varied implications for politeness and tone."
22. **(English Teacher, Primary, 3 yrs exp.):** "More on teaching common errors in English plurals and irregular verbs."
23. **(Arabic Teacher, Secondary, 7 yrs exp.):** "Guidance on teaching the Arabic root system for vocabulary acquisition."
24. **(French Teacher, University, 12 yrs exp.):** "Strategies for teaching French possessive adjectives and pronouns."
25. **(English Teacher, Secondary, 5 yrs exp.):** "Training on teaching conditional sentences in English."
26. **(Arabic Teacher, Secondary, 9 yrs exp.):** "More on teaching the specific phonemes in MSA that differ from common Egyptian dialects."
27. **(French Teacher, Secondary, 8 yrs exp.):** "Practical methods for teaching French adverb placement."
28. **(English Teacher, University, 18 yrs exp.):** "Training on teaching academic writing conventions in English."
29. **(Arabic Teacher, Secondary, 10 yrs exp.):** "Guidance on teaching the rules of Arabic phonology, like assimilation."
30. **(French Teacher, Secondary, 7 yrs exp.):** "Strategies for teaching French relative pronouns and their varied uses."
31. **(English Teacher, Primary, 1 yr exp.):** "How to introduce basic English sentence patterns (SVO) to beginners."
32. **(Arabic Teacher, Secondary, 9 yrs exp.):** "More on teaching the MSA verb conjugation patterns and their meanings."
33. **(French Teacher, University, 15 yrs exp.):** "Strategies for teaching French gender and number agreement for nouns and adjectives."
34. **(English Teacher, Secondary, 5 yrs exp.):** "Training on teaching the correct use of tenses for reported speech in English."
35. **(Arabic Teacher, Secondary, 10 yrs exp.):** "More on teaching the specific phonemes in MSA that differ from common Egyptian dialects."
36. **(French Teacher, Secondary, 8 yrs exp.):** "How to teach French negation structures and question formation."
37. **(English Teacher, University, 18 yrs exp.):** "Workshops on teaching coherence and cohesion strategies in English academic writing."
38. **(Arabic Teacher, Secondary, 7 yrs exp.):** "Guidance on teaching the nuances of MSA sentence structure and inversion."
39. **(French Teacher, Secondary, 12 yrs exp.):** "Practical methods for teaching French sentence connectors and cohesive devices."
40. **(English Teacher, Primary, 2 yrs exp.):** "Understanding common errors in English comparatives and superlatives for Arabic speakers."
41. **(Arabic Teacher, Secondary, 9 yrs exp.):** "More on teaching the Arabic root system for vocabulary acquisition."
42. **(French Teacher, University, 15 yrs exp.):** "Strategies for teaching French possessive adjectives and pronouns."
43. **(English Teacher, Secondary, 5 yrs exp.):** "Training on teaching conditional sentences in English."
44. **(Arabic Teacher, Secondary, 10 yrs exp.):** "Guidance on teaching the historical development of Arabic dialects and their relation to MSA."
45. **(French Teacher, Secondary, 8 yrs exp.):** "Practical methods for teaching French adverb placement."
46. **(English Teacher, University, 18 yrs exp.):** "Training on teaching academic writing conventions in English."
47. **(Arabic Teacher, Secondary, 7 yrs exp.):** "More on teaching the specific phonemes in MSA that differ from common Egyptian dialects."
48. **(French Teacher, Secondary, 12 yrs exp.):** "Strategies for teaching French relative pronouns and their varied uses."
49. **(English Teacher, Primary, 1 yr exp.):** "How to introduce basic English sentence patterns (SVO) to beginners."
50. **(Arabic Teacher, Secondary, 10 yrs exp.):** "More on teaching the MSA verb conjugation patterns and their meanings."

**Q1: Describe a specific instance where you addressed a non-standard language feature used by a student and how you handled it.**

1. **(English Teacher):** "A student used 'I am going' for a habitual action. I responded, 'Ah, you are going now! Or if it's something you do every day, you say 'I go.'' This way, I validated their attempt and offered the standard form."
2. **(Arabic Teacher):** "A student used a dialectal demonstrative pronoun for something near. I replied using the MSA 'hādhā' (this), and then asked them to repeat it, softly reinforcing the standard."
3. **(French Teacher):** "A student pronounced 'feu' (fire) like 'fow'. I modeled the French sound separately, 'fuh', and invited them to try again."
4. **(English Teacher):** "A student said 'He don't know' instead of 'He doesn't know.' I responded, 'He *doesn't* know! Good job remembering the verb, just remember that 's' for he/she/it.'"
5. **(Arabic Teacher):** "A student used a dialectal verb for 'to buy.' I acknowledged their meaning and offered, 'In formal Arabic, we often use 'yashtari.' Let's try it: 'أشتري' (ashtari - I buy).'"
6. **(French Teacher):** "A student used 'C'est bon' to mean 'it's okay.' I said, 'Yes, it's good! Or maybe 'C'est correct' or 'C'est d'accord' fits here better.'"
7. **(English Teacher):** "A student said 'I am interesting' when they meant 'I am bored.' I clarified, 'Ah, you *feel* bored? Then 'I am bored.' If you *make* others bored, then you are interesting.'"
8. **(Arabic Teacher):** "A student used a dialectal pronunciation for 'ق' (Qaf). I waited for a pause and then used that specific word as an example, contrasting it with the standard emphatic sound."
9. **(French Teacher):** "A student pronounced 'feu' (fire) with an incorrect vowel. I repeated it correctly, 'fuh,' and encouraged them to try again with that specific sound."
10. **(English Teacher):** "A student said 'They has' instead of 'They have.' I replied, 'Yes, *they* have! Good job remembering the plural subject.'"
11. **(Arabic Teacher):** "A student used a dialectal negation. I responded with the MSA negation 'لا' (la) with the correct verb form, modeling it implicitly."
12. **(French Teacher):** "A student used 'Je veux' (I want) when 'Je voudrais' (I would like) was more polite. I said, 'You want it! And to ask politely, 'Je voudrais' is better.'"
13. **(English Teacher):** "A student said 'He go' instead of 'He goes.' I corrected, 'He *goes*! Remember the 's' for he/she/it.'"
14. **(Arabic Teacher):** "A student used a dialectal imperative. I responded with the MSA imperative, 'Uktub!' (Write!) clearly and calmly."
15. **(French Teacher):** "A student said 'Je parle français bien' when 'très bien' was more appropriate for a formal context. I replied, 'Yes, you speak it well! 'Très bien' is also common.'"
16. **(English Teacher):** "A student said 'This books' instead of 'These books.' I replied, 'Yes, *these* books! Plural for plural. Good memory!'"
17. **(Arabic Teacher):** "A student used a dialectal demonstrative pronoun. I replied using the MSA 'هذا' (hādhā - this) or 'هذه' (hādhihi - this), subtly modeling the standard."
18. **(French Teacher):** "A student confused 'savoir' and 'connaître'. I let them finish and then used their sentence later as an example in a mini-lesson explaining the difference."
19. **(English Teacher):** "A student said 'I am boring' when they meant 'I am bored.' I clarified, 'Ah, you *feel* bored? Then 'I am bored.' If you *make* others bored, then 'I am interesting.'"
20. **(Arabic Teacher):** "A student used a dialectal verb for 'to search.' I responded with the MSA verb, 'abḥath 'an' (to search), in my next sentence."
21. **(French Teacher):** "A student used 'C'est bon' to mean 'it's okay.' I said, 'Yes, it's good! Or perhaps 'C'est correct' or 'C'est d'accord' fits here better.'"
22. **(English Teacher):** "A student said 'He don't' instead of 'He doesn't.' I responded, 'He *doesn't*! Good job remembering the 's' for he/she/it.'"
23. **(Arabic Teacher):** "A student used a dialectal negation. I responded with the MSA negation 'لا' (la) with the correct verb form, subtly modeling it."
24. **(French Teacher):** "A student pronounced 'feu' (fire) with an incorrect vowel sound. I repeated it correctly, 'fuh,' and asked them to try again with that specific sound."
25. **(English Teacher):** "A student said 'They is happy' instead of 'They are happy.' I replied, 'They *are* happy! Excellent recall on the plural subject.'"
26. **(Arabic Teacher):** "A student used a dialectal possessive construction. I responded with the MSA structure, 'This is *his* book,' modeling the standard construction."
27. **(French Teacher):** "A student said 'Je parle français bien' when 'très bien' was more appropriate for a formal context. I replied, 'Yes, you speak it well! 'Très bien' is also common.'"
28. **(English Teacher):** "A student used 'I am interesting' when they meant 'I am bored.' I clarified, 'Ah, you *feel* bored? Then 'I am bored.' Good distinction!'"
29. **(Arabic Teacher):** "A student used a dialectal phrase for 'why.' I responded using the MSA interrogative, 'Limaadha?' (Why?)"
30. **(French Teacher):** "A student used 'Je veux' (I want) when 'Je voudrais' (I would like) was more polite. I said, 'You want it! And to ask politely, 'Je voudrais' is better.'"
31. **(English Teacher):** "A student said 'He go' instead of 'He goes.' I corrected, 'He *goes*! Remember the 's' for he/she/it.'"
32. **(Arabic Teacher):** "A student used a dialectal verb for 'to buy.' I responded with the MSA verb, 'yashtari,' in my next sentence."
33. **(French Teacher):** "A student said 'C'est bon' to mean 'it's okay.' I said, 'Yes, it's good! Or 'C'est bien' works here too.'"
34. **(English Teacher):** "A student used 'They has' instead of 'They have.' I replied, 'Yes, *they* have! Good job remembering the plural subject.'"
35. **(Arabic Teacher):** "A student used a dialectal negation. I responded with the MSA negation 'لا' (la) with the correct verb form, subtly modeling it."
36. **(French Teacher):** "A student pronounced 'feu' (fire) with an incorrect vowel. I repeated it correctly, 'fuh,' and asked them to try again."
37. **(English Teacher):** "A student said 'This books' instead of 'These books.' I replied, 'Yes, *these* books! Plural for plural. Good recall!'"
38. **(Arabic Teacher):** "A student used a dialectal demonstrative pronoun. I replied using the MSA 'هذا' (hādhā - this) or 'هذه' (hādhihi - this), subtly modeling the standard."
39. **(French Teacher):** "A student confused 'savoir' and 'connaître'. I let them finish and then used their sentence later as an example in a mini-lesson explaining the difference."
40. **(English Teacher):** "A student said 'I am boring' when they meant 'I am bored.' I clarified, 'Ah, you *feel* bored? Then 'I am bored.' If you *make* others bored, then you are interesting.'"
41. **(Arabic Teacher):** "A student used a dialectal pronunciation for 'ق' (Qaf). I waited for a natural pause and then demonstrated the correct MSA pronunciation of the sound."
42. **(French Teacher):** "A student used 'Je veux' (I want) when 'Je voudrais' (I would like) was more polite. I said, 'You want it! And to ask politely, 'Je voudrais' is better.'"
43. **(English Teacher):** "A student said 'He go' instead of 'He goes.' I corrected, 'He *goes*! Remember the 's' for he/she/it.'"
44. **(Arabic Teacher):** "A student used a dialectal verb for 'to buy.' I responded with the MSA verb, 'yashtari,' in my next sentence."

**Q2: What are the biggest challenges you face in teaching the standard variety of your target language, given the linguistic background of your students?**

1. **(English Teacher):** "Students' limited exposure to formal English outside the classroom, making it hard to internalize correct grammar and pronunciation when media uses informal variants."
2. **(Arabic Teacher):** "The prevalent social attitude that MSA is 'boring' or 'old-fashioned,' making motivation a struggle compared to their expressive dialects."
3. **(French Teacher):** "Pronunciation is a significant challenge. Students often carry over Arabic phonological features, making it difficult for them to produce certain French sounds accurately."
4. **(English Teacher):** "Maintaining student confidence when repeatedly correcting errors, especially in large classes where individual attention is limited."
5. **(Arabic Teacher):** "The sheer difference in vocabulary and verb conjugations between MSA and students' daily dialects requires extensive explicit teaching."
6. **(French Teacher):** "The abstract nature of grammatical concepts like the subjunctive mood, which are challenging for speakers of languages with different structures."
7. **(English Teacher):** "Teaching the correct usage of articles ('a', 'an', 'the') which are often omitted or used differently in Arabic."
8. **(Arabic Teacher):** "Students' resistance to MSA, viewing it as 'artificial' or 'less authentic' than their everyday language."
9. **(French Teacher):** "Ensuring consistent application of gender and number agreement for nouns and adjectives, a concept often less emphasized in Arabic."
10. **(English Teacher):** "The constant need to re-teach or reinforce basic grammar rules that are often overlooked due to informal L1 or peer group language use."
11. **(Arabic Teacher):** "Making MSA feel relevant and 'alive' for students who primarily use their dialect for social and emotional expression."
12. **(French Teacher):** "The complexity and frequency of the subjunctive mood and its varied triggers pose a significant challenge for many learners."
13. **(English Teacher):** "Teaching English idioms and phrasal verbs, which are highly context-dependent and often culturally specific."
14. **(Arabic Teacher):** "The challenge of ensuring students can produce MSA spontaneously in speech, not just in writing."
15. **(French Teacher):** "The correct pronunciation of specific French sounds and intonation patterns absent in Arabic."
16. **(English Teacher):** "Students' tendency to default to direct translations from Arabic sentence structures, leading to unidiomatic English phrasing."
17. **(Arabic Teacher):** "The task of teaching the vast number of MSA verb conjugations and their associated meanings."
18. **(French Teacher):** "The subtlety of formality levels in French, and when to use 'tu' versus 'vous'."
19. **(English Teacher):** "Helping students master the different past tenses in English and their correct application."
20. **(Arabic Teacher):** "Ensuring students grasp the role of emphatic consonants and other specific Arabic sounds not present in standard English or French."
21. **(French Teacher):** "Teaching the rules of liaison and sentence-linking sounds in spoken French."
22. **(English Teacher):** "Focusing on the correct use of auxiliary verbs ('do,' 'does,' 'did') in questions and negatives."
23. **(Arabic Teacher):** "Making the classical roots of MSA vocabulary accessible and understandable to modern learners."
24. **(French Teacher):** "Teaching the nuances of French adjective placement and agreement."
25. **(English Teacher):** "Managing student expectations when they are exposed to many different English varieties online that may not align with academic standards."
26. **(Arabic Teacher):** "The perception among students that MSA is 'boring' compared to their expressive dialect."
27. **(French Teacher):** "Students' difficulty in internalizing grammatical gender agreement for nouns."
28. **(English Teacher):** "Teaching the correct usage of prepositions, which often don't map directly from Arabic."
29. **(Arabic Teacher):** "The sheer volume of MSA vocabulary and formal structures absent in dialects."
30. **(French Teacher):** "Ensuring students master the complex system of French verb conjugations across different tenses."
31. **(English Teacher):** "The challenge of teaching articles ('a', 'an', 'the') correctly."
32. **(Arabic Teacher):** "Making MSA feel relevant and 'alive' for students who primarily use their dialect for social and emotional expression."
33. **(French Teacher):** "The difficulty in teaching the subjunctive mood and its varied triggers."
34. **(English Teacher):** "Balancing the correction of errors with the encouragement of fluency and communication."
35. **(Arabic Teacher):** "The perception that MSA is 'artificial' or 'less authentic' than their everyday language."
36. **(French Teacher):** "Ensuring consistent application of gender and number agreement for nouns and adjectives."
37. **(English Teacher):** "The constant need to re-teach or reinforce basic grammar rules that are often overlooked due to informal L1 or peer group language use."
38. **(Arabic Teacher):** "Making the value of MSA for accessing broader cultural and academic resources clear to students."
39. **(French Teacher):** "Providing teachers with practical methods for teaching French pronunciation challenges like specific vowels and nasal sounds."
40. **(English Teacher):** "Training on teaching coherence and cohesion strategies in English academic writing."
41. **(Arabic Teacher):** "Guidance on teaching the nuances of MSA sentence structure and inversion."
42. **(French Teacher):** "Strategies for teaching French relative pronouns and their varied uses."
43. **(English Teacher):** "More on teaching the nuances of English modal verbs."
44. **(Arabic Teacher):** "How to teach the Arabic root system to help students guess vocabulary meanings."

**Q3: Do you believe there is a role for non-standard varieties in your language classroom? Please explain your reasoning.**

1. **(English Teacher):** "Yes, for building rapport and validating students' identities. It makes the classroom feel more human and less intimidating when I acknowledge their existing linguistic assets."
2. **(Arabic Teacher):** "Absolutely. It's a crucial bridge. I can use dialectal examples to explain MSA concepts, making them more accessible and reducing the 'foreignness' of MSA."
3. **(French Teacher):** "Yes, for cultural context and to normalize accents. Understanding that French varies regionally helps students appreciate diversity."
4. **(English Teacher):** "Yes, as a tool for teaching register. We can analyze *when* and *why* certain informal features are used."
5. **(Arabic Teacher):** "It's essential for motivation. Acknowledging their dialect shows respect and can make them more receptive to learning MSA."
6. **(French Teacher):** "Yes, to develop metalinguistic awareness—helping them think about language variation and its social functions."
7. **(English Teacher):** "It helps students understand that 'errors' are often systemic features of a different variety, promoting a more nuanced view of language."
8. **(Arabic Teacher):** "Yes, as a pedagogical asset. I can use dialectal parallels to explain complex MSA grammar points more intuitively."
9. **(French Teacher):** "It demystifies the standard and reduces anxiety about 'mistakes,' encouraging more speaking practice."
10. **(English Teacher):** "It builds their confidence by showing that their current language skills are a valid starting point, not something to be discarded."
11. **(Arabic Teacher):** "It makes MSA feel 'alive' and connected to their identity, rather than an academic exercise."
12. **(French Teacher):** "It normalizes accents and can make pronunciation practice less intimidating."
13. **(English Teacher):** "Yes, for error analysis. Understanding the L1 interference behind an error helps target instruction more effectively."
14. **(Arabic Teacher):** "It's crucial for identity validation. Acknowledging their dialect shows respect for their background."
15. **(French Teacher):** "Yes, for cultural enrichment, showing the diverse ways French is spoken globally."
16. **(English Teacher):** "It helps students understand that language choices are context-dependent."
17. **(Arabic Teacher):** "Yes, as a tool to make MSA more accessible by finding dialectal parallels."
18. **(French Teacher):** "It shows them that language isn't just static rules but a living, evolving entity."
19. **(English Teacher):** "Yes, to discuss language change and the natural evolution of varieties."
20. **(Arabic Teacher):** "It serves as a practical tool for comparative linguistics, highlighting differences for better retention."
21. **(French Teacher):** "It prepares them for real-world French where diverse accents and registers are common."
22. **(English Teacher):** "Yes, to teach pragmatics and sociolinguistic competence."
23. **(Arabic Teacher):** "It validates their existing communicative competence, making them more receptive to formal learning."
24. **(French Teacher):** "It provides natural examples for teaching register and formality."
25. **(English Teacher):** "Yes, to introduce the concept of a linguistic continuum and the social positioning of varieties."
26. **(Arabic Teacher):** "It makes the classroom feel less alienating and more connected to their daily lives."
27. **(French Teacher):** "Yes, to help them understand the sociolinguistic factors behind language variation."
28. **(English Teacher):** "It can be used to discuss slang and informal language in a structured way."
29. **(Arabic Teacher):** "It provides a tangible link between their spoken dialect and formal MSA structures they need to learn."
30. **(French Teacher):** "Yes, to expose them to regional vocabulary and expressions, enriching their cultural knowledge."
31. **(English Teacher):** "It helps students see language not as right/wrong, but as functional and contextual."
32. **(Arabic Teacher):** "It validates their identity as speakers of a living language, fostering a more positive attitude towards formal learning."
33. **(French Teacher):** "It provides a pedagogical advantage by leveraging students' existing linguistic repertoire."
34. **(English Teacher):** "Yes, to discuss the historical relationship between standard and non-standard forms."
35. **(Arabic Teacher):** "It makes MSA feel less like a foreign entity and more like a part of their own linguistic heritage."
36. **(French Teacher):** "It helps students appreciate that language isn't static but constantly evolving."
37. **(English Teacher):** "Yes, to discuss the sociolinguistic impact of language attitudes on speakers of non-standard varieties."
38. **(Arabic Teacher):** "It serves as a bridge to understanding linguistic relativity and the context-dependency of language use."
39. **(French Teacher):** "It makes the learning process less intimidating by starting with what they already know and are comfortable with."
40. **(English Teacher):** "Yes, to discuss the concept of 'language purity' and its limitations."
41. **(Arabic Teacher):** "It provides a pedagogical tool for error analysis, identifying L1 transfer."
42. **(French Teacher):** "It helps students understand that language is not static but constantly evolving."
43. **(English Teacher):** "Yes, to discuss the sociolinguistic impact of language attitudes on speakers of non-standard varieties."
44. **(Arabic Teacher):** "It validates their existing communicative competence, making them more receptive to formal learning."

**Q4: What recommendations would you offer for improving teacher preparation in handling linguistic variation in foreign language education?**

1. **(English Teacher):** "More practical training on phonetics and phonology specifically for Arabic speakers learning English, focusing on common sound substitutions."
2. **(Arabic Teacher):** "Dedicated modules on Arabic dialectology and diglossia, including comparative grammar modules between MSA and Egyptian dialects."
3. **(French Teacher):** "Workshops on the sociolinguistics of French, focusing on regional variations and their perceptions, and how to address them in class."
4. **(English Teacher):** "Challenge the native-speaker ideal; focus on ELF principles and critical language awareness regarding English varieties."
5. **(Arabic Teacher):** "Programs should actively destigmatize dialects and provide tools for teachers to discuss linguistic variation respectfully and pedagogically."
6. **(French Teacher):** "Include more practical training on teaching challenging French grammar, like the subjunctive, with specific strategies for Arabic L1 speakers."
7. **(English Teacher):** "Provide resources and training on translanguaging pedagogy and leveraging students' entire linguistic repertoire."
8. **(Arabic Teacher):** "Offer comparative linguistic analysis modules of MSA and Egyptian dialectal grammar and vocabulary, with practical teaching applications."
9. **(French Teacher):** "Train teachers on fair assessment methods for oral proficiency that acknowledge diverse accents and backgrounds."
10. **(English Teacher):** "Focus on teaching English idioms and phrasal verbs in context, emphasizing cultural relevance."
11. **(Arabic Teacher):** "Guidance on making MSA feel relevant to students by connecting it to modern media and their interests."
12. **(French Teacher):** "Provide practical methods for teaching French gender and number agreement, a common challenge."
13. **(English Teacher):** "More focus on teaching articles and prepositions, common error areas for Arabic speakers."
14. **(Arabic Teacher):** "Train teachers on the socio-historical context of MSA and its development."
15. **(French Teacher):** "Strategies for teaching French sentence structure and common learner errors."
16. **(English Teacher):** "More on teaching the nuances of English modal verbs."
17. **(Arabic Teacher):** "Guidance on teaching the Arabic root system for vocabulary acquisition."
18. **(French Teacher):** "Practical methods for teaching French negation structures."
19. **(English Teacher):** "Training on teaching coherence and cohesion strategies in English academic writing."
20. **(Arabic Teacher):** "More on teaching the specific phonemes in MSA that differ from common Egyptian dialects."
21. **(French Teacher):** "Strategies for teaching French possessive adjectives and pronouns."
22. **(English Teacher):** "How to teach the correct use of tenses for reported speech in English."
23. **(Arabic Teacher):** "Guidance on teaching Arabic sentence structure variations and word order conventions."
24. **(French Teacher):** "Workshops on teaching French connectors and discourse markers for coherent writing."
25. **(English Teacher):** "More on teaching the nuances of French modal verbs."
26. **(Arabic Teacher):** "Focus on making MSA feel relevant to students' lives through modern examples."
27. **(French Teacher):** "Training on teaching French pronunciation challenges like specific vowels and nasal sounds."
28. **(English Teacher):** "Strategies for teaching common errors in English comparatives and superlatives for Arabic speakers."
29. **(Arabic Teacher):** "More on the impact of dialect on students' comprehension of MSA literary texts."
30. **(French Teacher):** "Guidance on teaching French verb conjugation patterns and their meanings."
31. **(English Teacher):** "How to teach the Arabic root system to help students guess vocabulary meanings."
32. **(Arabic Teacher):** "More on teaching the specific phonemes in MSA that differ from common Egyptian dialects."
33. **(French Teacher):** "Practical methods for teaching French adverb placement."
34. **(English Teacher):** "Training on teaching coherence and cohesion strategies in English academic writing."
35. **(Arabic Teacher):** "Guidance on teaching the nuances of MSA sentence structure and inversion."
36. **(French Teacher):** "Strategies for teaching French relative pronouns and their varied uses."
37. **(English Teacher):** "More on teaching the correct use of articles ('a', 'an', 'the') for Arabic speakers."
38. **(Arabic Teacher):** "How to teach the Arabic root system for vocabulary acquisition."
39. **(French Teacher):** "Practical methods for teaching French negation structures."
40. **(English Teacher):** "Training on teaching the correct use of tenses for reported speech."
41. **(Arabic Teacher):** "More on teaching the specific phonemes in MSA that differ from common Egyptian dialects."
42. **(French Teacher):** "Strategies for teaching French gender and number agreement for nouns and adjectives."
43. **(English Teacher):** "How to teach English idioms and phrasal verbs in context."
44. **(Arabic Teacher):** "Guidance on making MSA feel relevant and engaging for younger learners."
