# Supplementary material
Source: Research Square preprint supplement (doi:10.21203/rs.3.rs-9540613/v1)
Supplement: Supplementary file 6 [file 74c3b407ccccb6ee1d71c014.docx]

**The Linguistic Variation in Egyptian Classrooms Questionnaire (LVECQ)**

**Instructions for Respondents**:
Thank you for participating in this questionnaire, designed to explore linguistic variation in Egyptian classrooms. Your responses will provide valuable insights into attitudes, practices, and challenges related to teaching standard and non-standard language varieties. Please complete all sections honestly and to the best of your ability. The questionnaire consists of three parts: Demographic Information, Attitudinal Scales, and Pedagogical Practices with Open-Ended Questions. It should take approximately 15-20 minutes to complete. All responses are confidential and will be used solely for research purposes. For Likert-scale questions, select the option that best reflects your opinion or practice. For open-ended questions, provide detailed responses where possible to share your experiences and perspectives.

**Section 1: Demographic Information**

Please provide the following background information to help us understand your context.

1. **Gender**:
   - Male
   - Female
   - Other
   - Prefer not to say
2. **Age Group**:
   - Under 25
   - 25–34
   - 35–44
   - 45–54
   - 55 or older
3. **Teaching Specialization**:
   Please specify your primary teaching subject (e.g., Arabic, English, French, etc.):
4. **Current Teaching Level**:
   - Primary
   - Preparatory
   - Secondary
   - University
   - Other (please specify): ___________
5. **Years of Teaching Experience**:
   - Less than 1 year
   - 1–5 years
   - 6–10 years
   - 11–20 years
   - More than 20 years
6. **Highest Educational Qualification**:
   - Bachelor’s degree
   - Master’s degree
   - Doctorate
   - Other (please specify): ___________
7. **Languages Taught**:
   List all languages you currently teach:
8. **L1 Arabic Dialect (Primary Daily Use)**:
   Describe the primary Arabic dialect you use in daily life (e.g., Cairene, Sa’idi):

**Section 2: Attitudinal Scales**

This section measures your attitudes toward standard and non-standard language varieties in your teaching. Please rate each statement based on the language(s) you teach, using the following 5-point scale:

- 1 = Strongly Disagree (SD)
- 2 = Disagree (D)
- 3 = Neutral (N)
- 4 = Agree (A)
- 5 = Strongly Agree (SA)

**Arabic Language Attitudes**

| **Item code** | **Statement** | **SD** | **D** | **N** | **A** | **SA** |
| --- | --- | --- | --- | --- | --- | --- |
| A1 | Standard Arabic is inherently more correct than colloquial Egyptian Arabic. | [ ] | [ ] | [ ] | [ ] | [ ] |
| A2 | Colloquial Egyptian Arabic should be acknowledged in Arabic language classrooms. | [ ] | [ ] | [ ] | [ ] | [ ] |
| A3 | Teaching only Modern Standard Arabic (MSA) is sufficient for learners. | [ ] | [ ] | [ ] | [ ] | [ ] |
| A4 | Awareness of different Arabic dialects enriches cultural understanding in language learning. | [ ] | [ ] | [ ] | [ ] | [ ] |
| A5 | Teachers’ use of colloquial Arabic features in their native Arabic teaching is acceptable. | [ ] | [ ] | [ ] | [ ] | [ ] |

**English Language Attitudes**

| **Item code** | **Statement** | **SD** | **D** | **N** | **A** | **SA** |
| --- | --- | --- | --- | --- | --- | --- |
| B1 | Standard British English is the most appropriate variety for formal academic settings. | [ ] | [ ] | [ ] | [ ] | [ ] |
| B2 | Exposure to diverse English varieties (e.g., American, British) is beneficial for EFL learners. | [ ] | [ ] | [ ] | [ ] | [ ] |
| B3 | Understanding different English accents helps learners become more culturally aware. | [ ] | [ ] | [ ] | [ ] | [ ] |
| B4 | Understanding different English accents helps learners become more culturally aware. | [ ] | [ ] | [ ] | [ ] | [ ] |
| B5 | Teachers with non-native accents are as effective as native-speaking teachers. | [ ] | [ ] | [ ] | [ ] | [ ] |

**French Language Attitudes**

| **Item code** | **Statement** | **SD** | **D** | **N** | **A** | **SA** |
| --- | --- | --- | --- | --- | --- | --- |
| C1 | Standard French is the only acceptable form for formal written French. | [ ] | [ ] | [ ] | [ ] | [ ] |
| C2 | Learners of French should be exposed to regional French variations. | [ ] | [ ] | [ ] | [ ] | [ ] |
| C3 | Non-standard French features used by learners should be corrected to ensure adherence to the standard. | [ ] | [ ] | [ ] | [ ] | [ ] |
| C4 | Learning about the cultural contexts of different French varieties fosters a broader understanding of the language. | [ ] | [ ] | [ ] | [ ] | [ ] |
| C5 | A teacher’s dialect or accent in French significantly impacts student learning. | [ ] | [ ] | [ ] | [ ] | [ ] |

**Section 3: Pedagogical Practices and Open-Ended Questions**

This section explores your classroom practices and beliefs about teaching strategies related to linguistic variation.

**Reported Practices**

Please indicate the frequency of the following teaching behaviors using this scale:

- Never (N)
- Rarely (R)
- Sometimes (S)
- Often (O)
- Always (A)

1. How often do you correct non-standard forms in students’ oral production?
   - N [ ] R [ ] S [ ] O [ ] A
2. How often do you incorporate discussions of linguistic variation (e.g., dialects, accents) into your lessons?
   - N [ ] R [ ] S [ ] O [ ] A
3. How often do you use non-standard language varieties in your teaching to illustrate cultural or contextual differences?
   - N [ ] R [ ] S [ ] O [ ] A

**Perceived Effectiveness**

Rate the following statements about teaching strategies using the 5-point Likert scale (SD to SA):

| **Statement** | **SD** | **D** | **N** | **A** | **SA** |
| --- | --- | --- | --- | --- | --- |
| Correcting non-standard language features improves students’ proficiency in the standard variety. | [ ] | [ ] | [ ] | [ ] | [ ] |
| Incorporating diverse language varieties in lessons enhances student engagement. | [ ] | [ ] | [ ] | [ ] | [ ] |
| Teaching cultural contexts alongside language varieties improves learning outcomes. | [ ] | [ ] | [ ] | [ ] | [ ] |

**Professional Development Needs**

1. How prepared do you feel to handle linguistic variation in your classroom?
   - Not prepared
   - Slightly prepared
   - Moderately prepared
   - Well prepared
   - Very well prepared
2. What areas of professional development would help you better address linguistic diversity?

**Open-Ended Questions**

Please provide detailed responses to the following questions:

1. Describe a specific instance where you addressed a non-standard language feature used by a student and how you handled it.
2. What are the biggest challenges you face in teaching the standard variety of your target language, given the linguistic background of your students?
3. Do you believe there is a role for non-standard varieties in your language classroom? Please explain your reasoning.
4. What recommendations would you offer for improving teacher preparation in handling linguistic variation in foreign language education?

**Semi-structured Interview Guide: Linguistic Variation in Egyptian Classrooms**

**Research Topic:** Pedagogical Approaches to Standard and Non-Standard Varieties in Arabic, English, and French Classrooms.

**Interviewer:**
**Interviewee:**
**Date:**
**Location:**
**Language of Interview:**

**Introduction to the Interviewee:**

"Thank you for agreeing to participate in this interview. As you know, our research is exploring how teachers in Egypt approach the use of different language varieties – standard, colloquial, and regional – in their Arabic, English, and French classrooms. Your experiences as a language educator are incredibly valuable to us. This interview is semistructured, meaning we have a set of questions to guide our conversation, but I might ask follow-up questions based on your responses to get a more in-depth understanding of your perspectives. There are no right or wrong answers; we are interested in your professional insights and experiences. The interview should take about 30-45 minutes. Your participation is voluntary, and all your responses will be kept confidential."

Section 1: Background and General Views on Language

**(To establish rapport and understand their general linguistic context)**

1. **Could you please briefly describe your teaching background, including the languages you teach, the levels you teach at, and your years of teaching experience?**
   - *Follow-up:* How does your own L1 dialect influence your perception of language?
2. **In your opinion, what is the role of a 'standard' language variety in language education? Why do you think it's often emphasized in curricula?**
3. **How do you view the relationship between standard language varieties and non-standard or colloquial varieties of a language? Do you see them as distinct, or do they interact in your experience?**

Section 2: Attitudes Towards Language Varieties

**(To explore their beliefs and perceptions)**

1. **Let's talk about the language(s) you primarily teach.** *(Tailor the next few questions to the interviewee's specialization: Arabic, English, or French)*
   - **[For Arabic Teachers]:**
     - How do you perceive the difference between Modern Standard Arabic (MSA) and the colloquial Egyptian dialects your students use daily?
     - Do you believe one variety is more appropriate or effective for educational settings than the other? Why?
     - What are your personal attitudes towards the colloquial Egyptian dialects? How might these attitudes influence your teaching of MSA?
   - **[For English Teachers]:**
     - How do you view the various English dialects (e.g., British English, American English, World Englishes) that your students may encounter or use?
     - Do you have a preference for a particular English variety as the target for your students? If so, why?
     - What are your attitudes towards the non-standard English features your students might produce, perhaps influenced by their L1?
   - **[For French Teachers]:**
     - How do you perceive the differences between Standard French and regional or colloquial French variations that students might be exposed to?
     - Do you believe it is important for your students to be aware of or even learn about these variations?
     - What are your personal attitudes towards non-standard French varieties? How might this influence your teaching?
2. **When you hear a student using a language variety that differs from the standard you teach, how do you typically react, both internally and in terms of your immediate classroom response?**
   - *Follow-up:* Can you recall a specific instance of this and how you handled it? What was the outcome?
3. **Do you think a teacher's own dialect or accent can influence students' learning or their attitudes towards the language? How so?**

Section 3: Pedagogical Approaches and Practices

**(To understand how attitudes translate into teaching)**

1. **How do you approach the teaching of the standard variety of the language you teach? What are your primary methods or strategies?**
2. **In your classroom, how do you address or manage the use of non-standard or colloquial language features by your students?**
   - *Follow-up:* Do you actively correct these features? If so, how? Or do you focus on other aspects?
   - *Follow-up:* Do you use any materials or activities that acknowledge or incorporate non-standard varieties? If yes, can you give an example? If no, why not?
3. **In your experience, what are the advantages or disadvantages of focusing solely on the standard language variety in your teaching?**
4. **What are the perceived advantages or disadvantages of acknowledging or integrating non-standard varieties into your teaching practice?**
5. **How do you think your pedagogical choices regarding language variation affect your students' overall confidence and their ability to communicate effectively in the target language?**
6. **When preparing teaching materials, how do you decide which language varieties to include or exclude? What factors influence this decision?**

Section 4: Teacher Training and Professional Development

**(To explore preparedness and future needs)**

1. **Thinking about your own teacher training, how well were you prepared to address linguistic variations (dialects, accents, non-standard forms) in your target language?**
   - *Follow-up:* Were there specific courses or modules that addressed this, or was it largely absent?
2. **What kind of professional development or further training would be most beneficial for you in effectively teaching about or managing linguistic variation in your classroom?**
3. **Are there specific resources, materials, or strategies you wish you had access to or were trained on regarding standard and non-standard language varieties?**

Section 5: Closing Remarks

1. **Do you have any final thoughts or recommendations regarding the teaching of standard and non-standard language varieties in Egyptian classrooms that we haven't covered?**

**Interviewer's Closing:**

"Thank you very much for your time and for sharing your valuable insights. Your contribution is greatly appreciated."
