# Supplementary material
Source: Research Square preprint supplement (doi:10.21203/rs.3.rs-9540613/v1)
Supplement: Supplementary file 8 [file c9720d36edc0ffeaf7387d7e.xlsx]

## Sheet: Sheet1
ONEWAY HighestEducational totalArabicLanguageAttitudes totalEnglishLanguageAttitudes totalFrenchLanguageAttitudes @1.Howoftendoyoucorrectnonstandardformsinstudents’oralproducti @1.Howoftendoyouincorporatediscussionsoflinguisticvariatione.g.d
@1.Howoftendoyouusenonstandardlanguagevarietiesinyourteachingtoi ReportedPractices Correctingnonstandardlanguagefeaturesimprovesstudents’proficie Incorporatingdiverselanguagevarietiesinlessonsenhancesstudenteng
Teachingculturalcontextsalongsidelanguagevarietiesimproveslearni PerceivedEffectiveness @1.Howprepareddoyoufeeltohandlelinguisticvariationinyourclassroo BY CurrentTeachingLevel
/MISSING ANALYSIS
/POSTHOC=LSD ALPHA(0.05).
Oneway
Notes
Output Created		15-JUL-2025 17:00:03
Comments
Input	Active Dataset	DataSet1
	Filter	<none>
	Weight	<none>
	Split File	<none>
	N of Rows in Working Data File	470
Missing Value Handling	Definition of Missing	User-defined missing values are treated as missing.
	Cases Used	Statistics for each analysis are based on cases with no missing data for any variable in the analysis.
Syntax		ONEWAY HighestEducational totalArabicLanguageAttitudes totalEnglishLanguageAttitudes totalFrenchLanguageAttitudes @1.Howoftendoyoucorrectnonstandardformsinstudents’oralproducti @1.Howoftendoyouincorporatediscussionsoflinguisticvariatione.g.d @1.Howoftendoyouusenonstandardlanguagevarietiesinyourteachingtoi ReportedPractices Correctingnonstandardlanguagefeaturesimprovesstudents’proficie Incorporati…
Resources	Processor Time	00:00:00.13
	Elapsed Time	00:00:00.13
ANOVA
		Sum of Squares	df	Mean Square	F	Sig.
Highest Educational	Between Groups	456.676	3	152.225	1039.05	6.26581e-206
	Within Groups	68.2711	466	0.146504
	Total	524.947	469
total Arabic Language Attitudes	Between Groups	2559.29	3	853.095	99.7802	6.76385e-50
	Within Groups	3984.18	466	8.54974
	Total	6543.47	469
total English Language Attitudes	Between Groups	2260.66	3	753.553	76.9468	1.917e-40
	Within Groups	4563.62	466	9.79317
	Total	6824.27	469
total French Language Attitudes	Between Groups	2507.54	3	835.845	98.5598	2.05974e-49
	Within Groups	3951.96	466	8.48059
	Total	6459.49	469
1. How often do you correct non-standard forms in students’ oral production?	Between Groups	141.175	3	47.0583	82.9495	5.1461e-43
	Within Groups	264.368	466	0.567313
	Total	405.543	469
1. How often do you incorporate discussions of linguistic variation (e.g., dialects, accents) into your lessons?	Between Groups	98.3164	3	32.7721	45.1555	1.24153e-25
	Within Groups	338.205	466	0.725762
	Total	436.521	469
1. How often do you use non-standard language varieties in your teaching to illustrate cultural or contextual differences?	Between Groups	88.2145	3	29.4048	56.5429	3.4676e-31
	Within Groups	242.341	466	0.520045
	Total	330.555	469
Reported Practices	Between Groups	959.283	3	319.761	101.334	1.65032e-50
	Within Groups	1470.46	466	3.1555
	Total	2429.75	469
Correcting non-standard language features improves students’ proficiency in the standard variety.	Between Groups	67.442	3	22.4807	24.2257	1.38695e-14
	Within Groups	432.432	466	0.927967
	Total	499.874	469
Incorporating diverse language varieties in lessons enhances student engagement.	Between Groups	102.385	3	34.1285	57.2696	1.56867e-31
	Within Groups	277.702	466	0.595927
	Total	380.087	469
Teaching cultural contexts alongside language varieties improves learning outcomes.	Between Groups	100.702	3	33.5673	44.0155	4.64263e-25
	Within Groups	355.383	466	0.762625
	Total	456.085	469
Perceived Effectiveness	Between Groups	788.941	3	262.98	65.7089	1.8945e-35
	Within Groups	1865.03	466	4.0022
	Total	2653.97	469
1. How prepared do you feel to handle linguistic variation in your classroom?	Between Groups	153.674	3	51.2248	85.8805	3.01448e-44
	Within Groups	277.953	466	0.596466
	Total	431.628	469
Post Hoc Tests
Multiple Comparisons
LSD
Dependent Variable			Mean Difference (I-J)	Std. Error	Sig.	95% Confidence Interval
						Lower Bound	Upper Bound
Highest Educational	Primary School	Secondary School	-.376-*	0.049414	1.5004e-13	-0.473292	-0.279089
		University/Higher Education	-1.990-*	0.0565211	2.16368e-133	-2.10117	-1.87903
		Other (e.g., language institutes)	-2.600-*	0.060807	2.09165e-163	-2.71949	-2.48051
	Secondary School	Primary School	.376*	0.049414	1.5004e-13	0.279089	0.473292
		University/Higher Education	-1.614-*	0.0463484	9.20585e-132	-1.70499	-1.52283
		Other (e.g., language institutes)	-2.224-*	0.0514882	4.93602e-165	-2.32499	-2.12263
	University/Higher Education	Primary School	1.990*	0.0565211	2.16368e-133	1.87903	2.10117
		Secondary School	1.614*	0.0463484	9.20585e-132	1.52283	1.70499
		Other (e.g., language institutes)	-.610-*	0.0583432	4.04092e-23	-0.724549	-0.495253
	Other (e.g., language institutes)	Primary School	2.600*	0.060807	2.09165e-163	2.48051	2.71949
		Secondary School	2.224*	0.0514882	4.93602e-165	2.12263	2.32499
		University/Higher Education	.610*	0.0583432	4.04092e-23	0.495253	0.724549
total Arabic Language Attitudes	Primary School	Secondary School	-1.4500-*	0.377486	0.000139379	-2.19179	-0.708214
		University/Higher Education	0.160655	0.43178	0.710004	-0.687821	1.00913
		Other (e.g., language institutes)	5.3443*	0.46452	3.91637e-27	4.43147	6.2571
	Secondary School	Primary School	1.4500*	0.377486	0.000139379	0.708214	2.19179
		University/Higher Education	1.6107*	0.354068	6.88295e-06	0.914888	2.30642
		Other (e.g., language institutes)	6.7943*	0.393331	4.93346e-52	6.02136	7.56721
	University/Higher Education	Primary School	-0.160655	0.43178	0.710004	-1.00913	0.687821
		Secondary School	-1.6107-*	0.354068	6.88295e-06	-2.30642	-0.914888
		Other (e.g., language institutes)	5.1836*	0.445699	1.25864e-27	4.3078	6.05946
	Other (e.g., language institutes)	Primary School	-5.3443-*	0.46452	3.91637e-27	-6.2571	-4.43147
		Secondary School	-6.7943-*	0.393331	4.93346e-52	-7.56721	-6.02136
		University/Higher Education	-5.1836-*	0.445699	1.25864e-27	-6.05946	-4.3078
total English Language Attitudes	Primary School	Secondary School	-1.1452-*	0.404004	0.00478595	-1.93913	-0.351342
		University/Higher Education	-0.329915	0.462112	0.475628	-1.238	0.578166
		Other (e.g., language institutes)	5.1662*	0.497153	6.86371e-23	4.18925	6.14313
	Secondary School	Primary School	1.1452*	0.404004	0.00478595	0.351342	1.93913
		University/Higher Education	.8153*	0.378941	0.0319434	0.0706786	1.55997
		Other (e.g., language institutes)	6.3114*	0.420963	9.47056e-42	5.48421	7.13865
	University/Higher Education	Primary School	0.329915	0.462112	0.475628	-0.578166	1.238
		Secondary School	-.8153-*	0.378941	0.0319434	-1.55997	-0.0706786
		Other (e.g., language institutes)	5.4961*	0.477009	3.35708e-27	4.55875	6.43346
	Other (e.g., language institutes)	Primary School	-5.1662-*	0.497153	6.86371e-23	-6.14313	-4.18925
		Secondary School	-6.3114-*	0.420963	9.47056e-42	-7.13865	-5.48421
		University/Higher Education	-5.4961-*	0.477009	3.35708e-27	-6.43346	-4.55875
total French Language Attitudes	Primary School	Secondary School	-.8905-*	0.375956	0.0182644	-1.62926	-0.151696
		University/Higher Education	0.641914	0.43003	0.136187	-0.203124	1.48695
		Other (e.g., language institutes)	5.7800*	0.462638	4.27828e-31	4.87088	6.68912
	Secondary School	Primary School	.8905*	0.375956	0.0182644	0.151696	1.62926
		University/Higher Education	1.5324*	0.352633	1.70657e-05	0.839443	2.22534
		Other (e.g., language institutes)	6.6705*	0.391738	6.59392e-51	5.90069	7.44027
	University/Higher Education	Primary School	-0.641914	0.43003	0.136187	-1.48695	0.203124
		Secondary School	-1.5324-*	0.352633	1.70657e-05	-2.22534	-0.839443
		Other (e.g., language institutes)	5.1381*	0.443893	2.07778e-27	4.26581	6.01037
	Other (e.g., language institutes)	Primary School	-5.7800-*	0.462638	4.27828e-31	-6.68912	-4.87088
		Secondary School	-6.6705-*	0.391738	6.59392e-51	-7.44027	-5.90069
		University/Higher Education	-5.1381-*	0.443893	2.07778e-27	-6.01037	-4.26581
1. How often do you correct non-standard forms in students’ oral production?	Primary School	Secondary School	-.2643-*	0.0972379	0.00681403	-0.455365	-0.0732066
		University/Higher Education	0.0243989	0.111224	0.82646	-0.194163	0.242961
		Other (e.g., language institutes)	1.3214*	0.119657	2.40951e-25	1.08629	1.55656
	Secondary School	Primary School	.2643*	0.0972379	0.00681403	0.0732066	0.455365
		University/Higher Education	.2887*	0.0912055	0.0016512	0.10946	0.46791
		Other (e.g., language institutes)	1.5857*	0.10132	1.13167e-44	1.38661	1.78481
	University/Higher Education	Primary School	-0.0243989	0.111224	0.82646	-0.242961	0.194163
		Secondary School	-.2887-*	0.0912055	0.0016512	-0.46791	-0.10946
		Other (e.g., language institutes)	1.2970*	0.114809	2.52913e-26	1.07142	1.52264
	Other (e.g., language institutes)	Primary School	-1.3214-*	0.119657	2.40951e-25	-1.55656	-1.08629
		Secondary School	-1.5857-*	0.10132	1.13167e-44	-1.78481	-1.38661
		University/Higher Education	-1.2970-*	0.114809	2.52913e-26	-1.52264	-1.07142
1. How often do you incorporate discussions of linguistic variation (e.g., dialects, accents) into your lessons?	Primary School	Secondary School	-0.15	0.109982	0.17327	-0.366122	0.066122
		University/Higher Education	0.241985	0.125801	0.0550186	-0.00522168	0.489192
		Other (e.g., language institutes)	1.1624*	0.13534	1.33156e-16	0.896429	1.42833
	Secondary School	Primary School	0.15	0.109982	0.17327	-0.066122	0.366122
		University/Higher Education	.3920*	0.103159	0.000164002	0.189271	0.594699
		Other (e.g., language institutes)	1.3124*	0.114599	6.31336e-27	1.08719	1.53757
	University/Higher Education	Primary School	-0.241985	0.125801	0.0550186	-0.489192	0.00522168
		Secondary School	-.3920-*	0.103159	0.000164002	-0.594699	-0.189271
		Other (e.g., language institutes)	.9204*	0.129856	5.07269e-12	0.66522	1.17557
	Other (e.g., language institutes)	Primary School	-1.1624-*	0.13534	1.33156e-16	-1.42833	-0.896429
		Secondary School	-1.3124-*	0.114599	6.31336e-27	-1.53757	-1.08719
		University/Higher Education	-.9204-*	0.129856	5.07269e-12	-1.17557	-0.66522
1. How often do you use non-standard language varieties in your teaching to illustrate cultural or contextual differences?	Primary School	Secondary School	-0.140476	0.0930989	0.132004	-0.323422	0.0424695
		University/Higher Education	-0.0807402	0.106489	0.448714	-0.289999	0.128518
		Other (e.g., language institutes)	1.0795*	0.114564	2.05347e-19	0.854398	1.30465
	Secondary School	Primary School	0.140476	0.0930989	0.132004	-0.0424695	0.323422
		University/Higher Education	0.059736	0.0873233	0.494266	-0.11186	0.231332
		Other (e.g., language institutes)	1.2200*	0.0970069	1.95803e-31	1.02937	1.41063
	University/Higher Education	Primary School	0.0807402	0.106489	0.448714	-0.128518	0.289999
		Secondary School	-0.059736	0.0873233	0.494266	-0.231332	0.11186
		Other (e.g., language institutes)	1.1603*	0.109922	1.69131e-23	0.944259	1.37627
	Other (e.g., language institutes)	Primary School	-1.0795-*	0.114564	2.05347e-19	-1.30465	-0.854398
		Secondary School	-1.2200-*	0.0970069	1.95803e-31	-1.41063	-1.02937
		University/Higher Education	-1.1603-*	0.109922	1.69131e-23	-1.37627	-0.944259
Reported Practices	Primary School	Secondary School	-.5548-*	0.229329	0.0159423	-1.00541	-0.104115
		University/Higher Education	0.185644	0.262313	0.479474	-0.329819	0.701106
		Other (e.g., language institutes)	3.5633*	0.282204	1.21578e-31	3.00878	4.11788
	Secondary School	Primary School	.5548*	0.229329	0.0159423	0.104115	1.00541
		University/Higher Education	.7404*	0.215102	0.000629204	0.317716	1.1631
		Other (e.g., language institutes)	4.1181*	0.238955	7.5218e-52	3.64853	4.58766
	University/Higher Education	Primary School	-0.185644	0.262313	0.479474	-0.701106	0.329819
		Secondary School	-.7404-*	0.215102	0.000629204	-1.1631	-0.317716
		Other (e.g., language institutes)	3.3777*	0.270769	5.12309e-31	2.84561	3.90977
	Other (e.g., language institutes)	Primary School	-3.5633-*	0.282204	1.21578e-31	-4.11788	-3.00878
		Secondary School	-4.1181-*	0.238955	7.5218e-52	-4.58766	-3.64853
		University/Higher Education	-3.3777-*	0.270769	5.12309e-31	-3.90977	-2.84561
Correcting non-standard language features improves students’ proficiency in the standard variety.	Primary School	Secondary School	0.142857	0.124363	0.251264	-0.101524	0.387239
		University/Higher Education	0.18859	0.14225	0.185566	-0.0909402	0.468121
		Other (e.g., language institutes)	1.1448*	0.153036	3.71835e-13	0.844035	1.44549
	Secondary School	Primary School	-0.142857	0.124363	0.251264	-0.387239	0.101524
		University/Higher Education	0.0457331	0.116648	0.695191	-0.183487	0.274954
		Other (e.g., language institutes)	1.0019*	0.129583	6.59548e-14	0.747265	1.25654
	University/Higher Education	Primary School	-0.18859	0.14225	0.185566	-0.468121	0.0909402
		Secondary School	-0.0457331	0.116648	0.695191	-0.274954	0.183487
		Other (e.g., language institutes)	.9562*	0.146836	1.92502e-10	0.66763	1.24471
	Other (e.g., language institutes)	Primary School	-1.1448-*	0.153036	3.71835e-13	-1.44549	-0.844035
		Secondary School	-1.0019-*	0.129583	6.59548e-14	-1.25654	-0.747265
		University/Higher Education	-.9562-*	0.146836	1.92502e-10	-1.24471	-0.66763
Incorporating diverse language varieties in lessons enhances student engagement.	Primary School	Secondary School	-0.190476	0.09966	0.0565842	-0.386315	0.0053624
		University/Higher Education	-0.023338	0.113994	0.837872	-0.247344	0.200668
		Other (e.g., language institutes)	1.1476*	0.122638	3.45283e-19	0.906627	1.38861
	Secondary School	Primary School	0.190476	0.09966	0.0565842	-0.0053624	0.386315
		University/Higher Education	0.167138	0.0934773	0.0744244	-0.0165511	0.350827
		Other (e.g., language institutes)	1.3381*	0.103843	1.03606e-32	1.13404	1.54215
	University/Higher Education	Primary School	0.023338	0.113994	0.837872	-0.200668	0.247344
		Secondary School	-0.167138	0.0934773	0.0744244	-0.350827	0.0165511
		Other (e.g., language institutes)	1.1710*	0.117669	2.77316e-21	0.93973	1.40218
	Other (e.g., language institutes)	Primary School	-1.1476-*	0.122638	3.45283e-19	-1.38861	-0.906627
		Secondary School	-1.3381-*	0.103843	1.03606e-32	-1.54215	-1.13404
		University/Higher Education	-1.1710-*	0.117669	2.77316e-21	-1.40218	-0.93973
Teaching cultural contexts alongside language varieties improves learning outcomes.	Primary School	Secondary School	-.2238-*	0.11274	0.0477109	-0.445352	-0.00226684
		University/Higher Education	0.0436115	0.128956	0.735373	-0.209795	0.297018
		Other (e.g., language institutes)	1.1171*	0.138734	6.83654e-15	0.844521	1.38977
	Secondary School	Primary School	.2238*	0.11274	0.0477109	0.00226684	0.445352
		University/Higher Education	.2674*	0.105746	0.0117713	0.0596223	0.47522
		Other (e.g., language institutes)	1.3410*	0.117473	8.80598e-27	1.11011	1.57179
	University/Higher Education	Primary School	-0.0436115	0.128956	0.735373	-0.297018	0.209795
		Secondary School	-.2674-*	0.105746	0.0117713	-0.47522	-0.0596223
		Other (e.g., language institutes)	1.0735*	0.133113	6.25345e-15	0.811955	1.33511
	Other (e.g., language institutes)	Primary School	-1.1171-*	0.138734	6.83654e-15	-1.38977	-0.844521
		Secondary School	-1.3410-*	0.117473	8.80598e-27	-1.57179	-1.11011
		University/Higher Education	-1.0735-*	0.133113	6.25345e-15	-1.33511	-0.811955
Perceived Effectiveness	Primary School	Secondary School	-0.271429	0.25827	0.293827	-0.778946	0.236089
		University/Higher Education	0.208864	0.295417	0.479911	-0.37165	0.789377
		Other (e.g., language institutes)	3.4095*	0.317817	3.80976e-24	2.78499	4.03406
	Secondary School	Primary School	0.271429	0.25827	0.293827	-0.236089	0.778946
		University/Higher Education	.4803*	0.242247	0.0479932	0.00425965	0.956325
		Other (e.g., language institutes)	3.6810*	0.269111	4.80221e-36	3.15213	4.20977
	University/Higher Education	Primary School	-0.208864	0.295417	0.479911	-0.789377	0.37165
		Secondary School	-.4803-*	0.242247	0.0479932	-0.956325	-0.00425965
		Other (e.g., language institutes)	3.2007*	0.30494	2.81269e-23	2.60143	3.79989
	Other (e.g., language institutes)	Primary School	-3.4095-*	0.317817	3.80976e-24	-4.03406	-2.78499
		Secondary School	-3.6810-*	0.269111	4.80221e-36	-4.20977	-3.15213
		University/Higher Education	-3.2007-*	0.30494	2.81269e-23	-3.79989	-2.60143
1. How prepared do you feel to handle linguistic variation in your classroom?	Primary School	Secondary School	-.3238-*	0.0997051	0.00124751	-0.519737	-0.127882
		University/Higher Education	-0.0490335	0.114046	0.667433	-0.273141	0.175074
		Other (e.g., language institutes)	1.3314*	0.122693	1.29738e-24	1.09033	1.57253
	Secondary School	Primary School	.3238*	0.0997051	0.00124751	0.127882	0.519737
		University/Higher Education	.2748*	0.0935196	0.00346537	0.0910036	0.458548
		Other (e.g., language institutes)	1.6552*	0.10389	6.15484e-46	1.45109	1.85939
	University/Higher Education	Primary School	0.0490335	0.114046	0.667433	-0.175074	0.273141
		Secondary School	-.2748-*	0.0935196	0.00346537	-0.458548	-0.0910036
		Other (e.g., language institutes)	1.3805*	0.117722	5.24931e-28	1.14913	1.61179
	Other (e.g., language institutes)	Primary School	-1.3314-*	0.122693	1.29738e-24	-1.57253	-1.09033
		Secondary School	-1.6552-*	0.10389	6.15484e-46	-1.85939	-1.45109
		University/Higher Education	-1.3805-*	0.117722	5.24931e-28	-1.61179	-1.14913
*. The mean difference is significant at the 0.05 level.
