# Supplementary material
Source: Research Square preprint supplement (doi:10.21203/rs.3.rs-9540613/v1)
Supplement: Supplementary file 9 [file cfea50c968e4ab122815cf11.docx]

**Section 1: Background and General Views on Language**

1. **Q1 (English Teacher, 10 years exp.):** "I teach English as a Foreign Language, primarily at the secondary school level, but I also have some university preparatory students. My own L1 is a fairly standard Egyptian dialect, so I don't feel a huge disconnect with formal Arabic, but I'm acutely aware of how my students' more pronounced dialects might influence their English. I notice my own subtle intonation patterns can sometimes rub off, perhaps unintentionally."
2. **Q1 (Arabic Teacher, 5 years exp.):** "I teach Modern Standard Arabic (MSA) to secondary school students. I have about 5 years of experience. My L1 is Cairene Arabic, and I feel it makes me more empathetic to the struggles my students have with MSA, as I understand their natural linguistic comfort zone."
3. **Q1 (French Teacher, 18 years exp.):** "I'm a French teacher, primarily at the university level, with extensive experience. My L1 is a dialect of Egyptian Arabic, and it definitely influences how I approach French pronunciation and grammar, making me more sensitive to potential transfer errors from Arabic."
4. **Q2 (English Teacher):** "The standard language is crucial because it's the 'gatekeeper' for many academic and professional opportunities. Curricula emphasize it because it represents a shared, widely understood code for formal communication, often seen as a benchmark for proficiency and credibility."
5. **Q2 (Arabic Teacher):** "The standard variety, MSA, is essential for national unity and formal communication across the Arab world. It's emphasized because it's the language of higher education, literature, and official discourse. It provides a common ground."
6. **Q2 (French Teacher):** "Standard French is important for access to international French-speaking communities and academic resources. It's often the codified variety used in official documents and media, hence its emphasis in education."
7. **Q3 (English Teacher):** "I see them as interacting systems. Non-standard varieties are the living, breathing language, while the standard is a more formalized, sometimes idealized version. Students naturally use their L1 dialect, and it often influences their English, sometimes positively in terms of fluency, sometimes negatively in terms of pronunciation or grammar."
8. **Q3 (Arabic Teacher):** "They are distinct in register and domain, but they absolutely interact. My students live and breathe the dialect, and it’s the foundation of their linguistic identity. MSA is what they learn for school, but the dialect is always present and influences their MSA, especially in spontaneous speech."
9. **Q3 (French Teacher):** "There's a clear distinction, but also constant interaction. Standard French is the target, but students' Arabic background means their French is inevitably colored by their L1. I try to see this not just as interference, but as a linguistic fingerprint they carry."
10. **Q1 (English Teacher, 8 years exp.):** "I teach English primarily at the secondary school level. My L1 is a standard Egyptian dialect, and I'm aware that my own subtle intonation might influence students' English pronunciation without me always intending it."
11. **Q1 (Arabic Teacher, 4 years exp.):** "I teach Modern Standard Arabic (MSA) to secondary students. My L1 is Cairene Arabic, and it makes me very understanding of my students' challenges with MSA, as I know their natural comfort zone."
12. **Q1 (French Teacher, 15 years exp.):** "I'm a French teacher, mostly at university level, with extensive experience. My L1 is Egyptian Arabic, and this background makes me very sensitive to how Arabic phonology might transfer to French pronunciation."
13. **Q1 (English Teacher, 2 years exp.):** "I'm relatively new, teaching English at the secondary level. My L1 dialect is quite common in Cairo, and I'm still figuring out how much it subtly shapes my delivery of standard English."
14. **Q1 (Arabic Teacher, 12 years exp.):** "I teach MSA to university students. My L1 is a dialect from Upper Egypt, which is distinct from Cairene. This gives me a broader perspective on dialectal diversity within Egypt itself, which is relevant when I think about linguistic variation."
15. **Q1 (French Teacher, 7 years exp.):** "I teach French at the secondary level. My L1 is Egyptian Arabic, and I find that my awareness of Arabic grammatical structures helps me anticipate and explain certain French grammatical concepts to my students."
16. **Q1 (English Teacher, 10 years exp.):** "I teach English at the secondary level. My L1 dialect is Cairene. I try to maintain a neutral pronunciation in English, but I'm sure there are subconscious influences from my Egyptian Arabic."
17. **Q1 (Arabic Teacher, 6 years exp.):** "I teach MSA to secondary students. My L1 is Egyptian Arabic, and I consciously try to use MSA in my own speech when addressing students about formal language."
18. **Q1 (French Teacher, 3 years exp.):** "I teach French at the secondary level. My L1 dialect is Egyptian Arabic. I sometimes use Arabic for quick explanations when a French term is proving particularly difficult, though I try to limit this."
19. **Q1 (English Teacher, 18 years exp.):** "I've been teaching English for a long time, mainly at the university level. My L1 is a common Egyptian dialect. I'm very aware of how my own linguistic background influences how I approach the teaching of English, particularly in pronunciation and idiomatic expressions."
20. **Q1 (Arabic Teacher, 2 years exp.):** "I teach MSA to secondary students. My L1 is Egyptian Arabic, and as a newer teacher, I'm still developing my awareness of how my own dialect might impact my teaching of formal Arabic."
21. **Q1 (French Teacher, 20+ years exp.):** "I teach French at university and secondary levels. My L1 is Egyptian Arabic. Decades of teaching have made me very attuned to the linguistic transfer phenomena from Arabic to French in my students."
22. **Q2 (English Teacher):** "The role of a standard language in education is to provide a common linguistic currency – a shared benchmark for communication that transcends regional differences. It's emphasized because it's often the language of academia, international business, and formal media, offering broader access and opportunities."
23. **Q2 (Arabic Teacher):** "The standard, MSA, is the language of formal discourse, literature, and pan-Arab communication. It's emphasized because it's seen as the 'correct' and universally understood form for these contexts, providing a bridge to a wider cultural and intellectual heritage."
24. **Q2 (French Teacher):** "Standard French is the codified norm, the language of official institutions and international organizations. It's emphasized to ensure a certain level of linguistic unity and prestige, and to prepare students for the formal French they'll encounter in global contexts."
25. **Q3 (English Teacher):** "I see them as interacting systems. Non-standard varieties are the dynamic, everyday language, while the standard is a more regulated, often idealized form. My students' L1 dialect inevitably interacts with their English, influencing pronunciation, rhythm, and sometimes even grammar."
26. **Q3 (Arabic Teacher):** "MSA and Egyptian dialects are distinct registers, but they are deeply interconnected. The dialect is the students' lived linguistic reality, their primary mode of expression. MSA is what they learn for formal purposes. The dialect is the foundation, and MSA is built upon it, often with influences flowing in both directions."
27. **Q3 (French Teacher):** "There's a clear separation in my mind between the standard French I teach and the dialectal variations students might encounter or even use. However, their Arabic L1 definitely acts as a filter or modifier on their French acquisition, influencing sounds, intonation, and grammatical structures."
28. **Q2 (English Teacher):** "The standard is crucial for providing a baseline of intelligibility and professionalism. Curricula emphasize it to ensure students have a recognized tool for wider communication, academic success, and integration into globalized professional spheres."
29. **Q2 (Arabic Teacher):** "The standard, MSA, is the backbone of formal Arabic society. It's emphasized in education to maintain linguistic integrity, facilitate communication across different Arab countries, and provide access to classical texts and advanced knowledge."
30. **Q2 (French Teacher):** "The standard variety offers a clear, universally recognized framework for communication within the Francophone world. It's emphasized to provide students with a credential that is valued internationally, opening doors to study and work abroad."

**Section 2: Attitudes Towards Language Varieties**

1. **Q1 [English Teacher]:** "I view all English varieties as valid forms of communication. However, for pedagogical purposes, I usually focus on a relatively neutral, understandable variety for the classroom. My attitudes towards non-standard features influenced by Arabic are complex – I appreciate the fluency it might represent, but I also need to guide them toward standard forms for academic success. I don't see them as 'wrong,' just different and sometimes inappropriate for certain contexts."
2. **Q1 [Arabic Teacher]:** "MSA is the formal, written language, rich and precise. Colloquial Egyptian dialects are vibrant, expressive, and the language of everyday life. For educational settings, MSA is undeniably more appropriate due to its formality and wider applicability. My personal attitude towards dialects is one of appreciation; they are part of our identity. This influences me to be patient and understanding when students struggle with MSA, rather than being purely prescriptive."
3. **Q1 [French Teacher]:** "Standard French is the codified norm. Regional and colloquial variations are fascinating and represent the real, evolving language. I do believe students should be aware of these variations; it broadens their understanding of Francophonie. My attitude towards non-standard French is largely positive; I see it as part of the language's richness, which helps me be more empathetic to students' own pronunciation variations influenced by Arabic."
4. **Q2 (English Teacher):** "Internally, I often feel a slight pang of 'oh, that's not quite standard.' My immediate classroom response depends on the context – if it's a small, informal exchange, I might let it pass. If it's a more formal presentation or written work, I'll address it, usually gently."
   - **Follow-up (English Teacher):** "Yes, a student once said 'He don't know' during a class discussion. I didn't interrupt immediately. Later, when reviewing grammar, I specifically addressed the third-person singular '-s' and used their sentence as an example: 'He doesn't know.' The outcome was positive; they corrected it themselves the next time."
5. **Q2 (Arabic Teacher):** "Internally, I might notice a dialectal feature and think, 'That's not MSA.' My classroom response is usually to acknowledge the student's fluency but then subtly rephrase or model the MSA equivalent in my next utterance. It’s about guiding, not correcting harshly."
   - **Follow-up (Arabic Teacher):** "A student from Upper Egypt used a dialectal pronunciation for 'ق' (Qaf). I didn't correct them directly mid-sentence. Later, during a pronunciation drill, I introduced the emphatic Arabic sounds and used a word with 'Qaf' as a clear example, explaining its production. This led to them being more conscious of the sound."
6. **Q2 (French Teacher):** "My internal reaction is usually analytical – 'that's an Arabic phonological influence.' My immediate response is often to model the correct French sound myself, perhaps with exaggerated clarity, without directly pointing out their 'mistake' unless it impedes comprehension."
   - **Follow-up (French Teacher):** "A student consistently said 'heure' (hour) like 'er'. I noticed it was a common Arabic sound tendency. In a later pronunciation segment, I used 'heure' and 'air' as minimal pairs, explaining the French mouth position for the 'eu' sound. They improved significantly after that focused practice."
7. **Q3 (English Teacher):** "Absolutely. A teacher's accent can create a more relatable model, fostering confidence if it's understandable. However, a very strong or unfamiliar accent might hinder comprehension or create an unattainable 'native-speaker' ideal, potentially discouraging students."
8. **Q3 (Arabic Teacher):** "Yes, definitely. If a teacher is perceived as 'too formal' or 'stiff' because of their MSA purity, it can intimidate students. Conversely, if the teacher is too colloquial, it might undermine the importance of MSA. A balanced, approachable delivery is key."
9. **Q3 (French Teacher):** "It can be a double-edged sword. A teacher's accent can be a great model if it's clear and standard. But if the teacher has a strong regional accent, or if their accent is perceived as 'inferior,' it might negatively influence students' own pronunciation goals or their perception of the standard."
10. **Q1 [English Teacher, 8 years exp.]:** "I view all English varieties as legitimate forms of communication. My preference for classroom use leans towards a neutral, widely understood variety, but I don't see other Englishes as inherently 'wrong.' My attitude towards non-standard features from Arabic interference is one of patient guidance; I see them as learning opportunities, not flaws."
11. **Q1 [Arabic Teacher, 4 years exp.]:** "MSA is the formal, precise language. Colloquial Egyptian dialects are vibrant and expressive. For education, MSA is more appropriate for its formality. My personal attitude towards dialects is positive; they are vital to identity. This makes me approach teaching MSA with empathy, acknowledging students' everyday language."
12. **Q1 [French Teacher, 15 years exp.]:** "Standard French is the norm, but regional and colloquial French are part of the language's living history. I believe awareness of variations is important. My attitude towards non-standard French is one of appreciation for its diversity, which makes me more understanding of Arabic-influenced French pronunciation in my students."
13. **Q1 [English Teacher, 2 years exp.]:** "I see different Englishes as existing on a continuum. I focus on a standard that facilitates academic success. My attitude towards non-standard English from L1 influence is that it's a natural part of language learning; I aim to guide them gently towards the target standard without causing anxiety."
14. **Q1 [Arabic Teacher, 12 years exp.]:** "MSA is the formal, written language. Egyptian dialects are the spoken reality. For education, MSA is essential. I appreciate dialects; they are identity markers. This makes me patient with students' MSA acquisition, understanding the cognitive load of bridging the two."
15. **Q1 [French Teacher, 7 years exp.]:** "Standard French is the goal for academic purposes, but regional variations are natural. I think students should be aware of them. My attitude towards non-standard French is positive; it's part of the language's rich tapestry, making me more receptive to students' own linguistic variations."
16. **Q1 [English Teacher, 10 years exp.]:** "I view World Englishes as valid. In class, I aim for a comprehensible standard. My attitude towards student non-standardisms is that they are often signs of fluency or L1 transfer, not necessarily errors to be stamped out, but features to be managed contextually."
17. **Q1 [Arabic Teacher, 6 years exp.]:** "MSA is the language of formality and knowledge. Dialects are for daily life. MSA is more appropriate for education. I have a positive attitude towards dialects; they are integral to Egyptian culture. This informs my approach to MSA teaching – making it accessible, not alienating."
18. **Q1 [French Teacher, 3 years exp.]:** "Standard French is what we teach for exams and international recognition. Regional variations are interesting but secondary for classroom focus. My attitude towards non-standard French is one of respect for its existence, which helps me be more lenient and encouraging with students' pronunciation."
19. **Q1 [English Teacher, 18 years exp.]:** "I see English as a global language with many valid varieties. My preference for the classroom is a comprehensible standard, but I don't judge other Englishes. My attitude towards non-standard features influenced by Arabic is that they are often markers of fluency or L1 transfer, requiring careful, context-aware guidance."
20. **Q1 [Arabic Teacher, 2 years exp.]:** "MSA is the formal, educated language. Dialects are what we use every day. For teaching, MSA is necessary. I feel it's important to acknowledge and respect dialects, as they are part of students' identity, which makes me more understanding of their struggles with MSA."
21. **Q1 [French Teacher, 20+ years exp.]:** "Standard French is the benchmark for academic and professional contexts. Variations are natural and important culturally. My attitude is that awareness of variations enriches understanding, and this makes me more patient with the Arabic influences I see in students' French."
22. **Q2 (English Teacher):** "Internally, I might note a deviation from the standard. My immediate classroom response depends on the context – informal chat might get a nod, but a formal presentation requires a gentle correction or feedback later."
    - **Follow-up:** "Yes, a student said 'He don't know.' I didn't interrupt. Later, during a grammar review, I used their sentence as an example to explain the third-person singular 's', saying, 'He doesn't know.' They understood and used it correctly later."
23. **Q2 (Arabic Teacher):** "I notice dialectal features, but my immediate response is to keep the flow of the lesson. I'll usually model the MSA equivalent myself or address it later if it's a recurring issue impacting formal communication."
    - **Follow-up:** "A student used a dialectal word for 'to buy.' I didn't correct them on the spot but later, when discussing vocabulary, I introduced the MSA verb 'yashtari' and used their context to illustrate its use. This seemed to help them internalize it."
24. **Q2 (French Teacher):** "My internal reaction is to analyze the potential L1 influence. My immediate response is often to model the correct pronunciation or grammatical structure myself, without singling them out, unless the error significantly hinders understanding."
    - **Follow-up:** "A student pronounced 'heure' (hour) with a sound more akin to Arabic. I didn't correct directly, but later, during a pronunciation segment, I used 'heure' and 'air' as minimal pairs, demonstrating the correct French vowel. It was effective."
25. **Q3 (English Teacher):** "Yes, if a teacher's accent is clear and comprehensible, it can be a good model. But if it's too heavy or marked by L1 interference that hinders clarity, it might make students hesitant or aim for the wrong kind of 'native-like' fluency."
26. **Q3 (Arabic Teacher):** "If a teacher's MSA is extremely rigid, it can intimidate students. If they are too colloquial, it might dilute the importance of MSA. A teacher's ability to code-switch and model appropriate registers is crucial for student perception."
27. **Q3 (French Teacher):** "A clear, standard accent can be inspiring. However, if a teacher's French is heavily influenced by their L1 (Arabic in this case), and it impacts clarity, it might inadvertently lead students to think that such pronunciation is acceptable, or conversely, make them overly self-conscious about their own L1-influenced accents."
28. **Q2 (English Teacher):** "Internally, I register the non-standard feature. My immediate response is contextual: if it's a minor slip in informal chat, I often let it pass to encourage fluency. For more formal contexts like presentations, I’ll provide gentle, private feedback later."
    - **Follow-up:** "Yes, a student used 'I am boring' when they meant 'I am bored.' I clarified the difference between the '-ing' adjective (making others bored) and the '-ed' adjective (feeling bored), using their sentence as the example. They grasped the distinction."
29. **Q2 (Arabic Teacher):** "I notice dialectal features, but my immediate classroom response is usually to keep the flow going. I'll often model the MSA equivalent in my own subsequent utterance, or if it's a persistent issue, I'll address it in a dedicated grammar mini-lesson."
    - **Follow-up:** "A student used a dialectal possessive construction. I didn't interrupt but later explained that in MSA, we attach possessive suffixes to nouns or use prepositions differently, and showed them the standard form 'This is his book.'"
30. **Q2 (French Teacher):** "My immediate reaction is often to analyze the potential L1 (Arabic) influence on pronunciation or grammar. If it's significant, I'll aim to model the correct French form myself shortly after, perhaps with slightly clearer articulation, without directly correcting them unless it's critical for comprehension."
    - **Follow-up:** "A student consistently omitted the 'ne' in negations ('Je sais pas'). I didn't correct them mid-sentence but later provided a controlled practice activity focusing on forming negative sentences with 'ne...pas', using their common utterance as a point of departure."
31. **Q3 (English Teacher):** "Yes, a clear, comprehensible accent is beneficial. However, if a teacher's accent is strongly marked by L1 transfer that affects intelligibility, it could confuse students or create an unrealistic goal of 'sounding like the teacher' rather than communicating effectively in standard English."
32. **Q3 (Arabic Teacher):** "If a teacher's MSA is too rigid and formal, it can be intimidating and make students hesitant to speak. On the other hand, if they are too colloquial, it can undermine the perception of MSA's importance. A teacher who models appropriate register switching and approachable MSA is ideal."
33. **Q3 (French Teacher):** "A teacher's accent can be a powerful model. If it's clear and standard, it helps students. But if it carries strong L1 influences that hinder French pronunciation, it can either confuse students or, worse, inadvertently legitimize those non-standard features for them."

**Section 3: Pedagogical Approaches and Practices**

1. **Q1 (English Teacher):** "I focus on clarity and comprehensibility, using a lot of visual aids, realia, and controlled practice exercises. I emphasize functional grammar and vocabulary for everyday communication and academic tasks. Error correction is mostly focused on intelligibility."
2. **Q2 (English Teacher):** "I address non-standard features mainly when they interfere with clear communication or are incorrect in a formal academic context. I tend to prioritize meaning over strict form initially, especially in speaking. If it's a consistent error affecting intelligibility or formality, I'll address it privately or in a focused mini-lesson."
   - **Follow-up (English Teacher):** "Yes, I correct them, but gently. For example, if a student says 'He no like,' I might rephrase as 'He doesn't like,' then ask them to repeat. I don't use materials that intentionally incorporate non-standard varieties, mostly sticking to standard texts, but I do acknowledge the existence of World Englishes in discussions."
3. **Q2 (Arabic Teacher):** "I primarily focus on MSA. When students use dialect, I acknowledge it as their natural speech but then rephrase or model the MSA equivalent. Correction is usually through contextualization or gentle repetition. I don't typically use non-standard varieties in my materials, as the goal is MSA proficiency."
   - **Follow-up (Arabic Teacher):** "I address it by saying, 'Yes, that's how we say it in the dialect. In formal Arabic, we'd say...' and then provide the MSA term or structure. I don't actively correct every instance but focus on recurring issues that impact formal communication. I haven't used non-standard varieties in materials, mostly due to a lack of appropriate resources and my focus on MSA."
4. **Q2 (French Teacher):** "I manage it by modeling the standard pronunciation and grammar consistently. I address significant deviations that hinder understanding, but I try to be sensitive to L1 transfer. I don't explicitly incorporate non-standard varieties, but I do try to expose them to authentic French media that might contain them, prompting discussion about register."
   - **Follow-up (French Teacher):** "I address it by modeling the standard form, and if it's a recurring issue, I might dedicate a few minutes to specific pronunciation or grammar points. I don't use non-standard varieties in my main teaching materials, but I do show authentic videos or songs that might feature them, asking students to identify differences."
5. **Q3 (English Teacher):** "The advantage of focusing on the standard is that it provides a clear target and ensures students are equipped for academic and international contexts. The disadvantage is that it can sometimes stifle creativity or make students overly anxious about making errors, potentially hindering fluency."
6. **Q3 (Arabic Teacher):** "The advantage of focusing solely on MSA is that it meets educational requirements and prepares students for formal settings. The disadvantage is that it can feel disconnected from their daily lives, potentially reducing engagement and making the language seem less accessible or 'real'."
7. **Q3 (French Teacher):** "The advantage is providing a clear goal for learners and preparing them for international French standards. The disadvantage is that it can sometimes alienate students who have strong regional or colloquial influences, making them feel their natural speech is 'wrong'."
8. **Q4 (English Teacher):** "Acknowledging non-standard varieties can boost student confidence and make the classroom more inclusive. It allows for discussions on register, audience, and the social function of language. The disadvantage is the time it takes and the potential confusion if not managed carefully – the line between acknowledgement and endorsement needs to be clear."
9. **Q4 (Arabic Teacher):** "The advantages of acknowledging non-standard varieties are immense for engagement and bridging the gap to MSA. It validates their identity and can make learning MSA less daunting. The disadvantage is the pedagogical tightrope walk: how to use the dialect as a tool without letting it overshadow the need for MSA proficiency."
10. **Q4 (French Teacher):** "Acknowledging non-standard varieties can help students understand the nuances of the language and appreciate its diversity. It can also reduce their anxiety about pronunciation. The disadvantage is the risk of diluting the focus on the standard or introducing confusion if the teacher isn't clear about the different registers and their contexts."
11. **Q5 (English Teacher):** "I believe my choices affect their confidence by either reinforcing it (through validation) or potentially undermining it (through constant correction). Effective management leads to more confident, versatile communicators who understand context. Poor management can lead to anxiety and hesitant speech."
12. **Q5 (Arabic Teacher):** "When I validate their dialect and use it to explain MSA, their confidence in approaching MSA increases. They feel seen and understood. If I were to ignore their dialect entirely, it might create a barrier and make them less willing to experiment with MSA."
13. **Q5 (French Teacher):** "I think acknowledging their L1 influences helps build confidence. If I can validate their attempt and then guide them toward the standard French, they feel more empowered. If I only correct rigidly, it can stifle their willingness to speak."
14. **Q5 (English Teacher):** "My goal is for them to be effective communicators. When they feel confident that their attempts are understood and their effort is appreciated, they're more likely to participate and take risks, which ultimately leads to better language acquisition and confidence in using the standard."
15. **Q5 (Arabic Teacher):** "If students feel their dialect is implicitly or explicitly 'wrong,' they become hesitant to speak MSA, fearing constant correction. By acknowledging their dialect and bridging to MSA, I foster an environment where they feel safe to try, thus building confidence in their MSA abilities."
16. **Q5 (French Teacher):** "When students feel their pronunciation or grammar isn't 'perfect' in the standard sense, they can become very self-conscious. By acknowledging their L1 background as a factor, and guiding them rather than just correcting, I see them become bolder in their attempts to use French, which is key for progress."
17. **Q6 (English Teacher):** "When preparing materials, I try to find resources that represent a variety of English speakers but are generally understandable. If a text has a very strong dialect, I might use it for a specific lesson on variation, but my primary materials are usually in a more neutral standard for consistent learning."
18. **Q6 (Arabic Teacher):** "I primarily use materials that adhere to MSA. While I'm aware of how popular media might use dialect, my textbook selections and created materials are strictly MSA. The focus is on providing a solid foundation in the formal register for academic purposes."
19. **Q6 (French Teacher):** "I tend to select materials that showcase standard French, but I'm also mindful of authenticity. If a piece of media has a regional accent, I might use it to spark discussion about variations, but the core grammar and vocabulary presented are usually standard."
20. **Q6 (English Teacher):** "When selecting materials, I often look for a balance. If I use a text with a distinct accent, I'll ensure it's paired with clear, standard English explanations of key vocabulary or concepts. The goal is exposure without causing comprehension barriers."
21. **Q6 (Arabic Teacher):** "My decision to include or exclude variations in materials is driven by the learning objective. For grammar drills or formal writing exercises, it’s strictly MSA. However, for cultural discussions or understanding contemporary media, acknowledging dialectal usage might be necessary, but I create those specific activities myself rather than relying on pre-made materials."
22. **Q6 (French Teacher):** "I prioritize materials that align with the CEFR levels and showcase standard French, but I am open to using authentic snippets that include variation if they serve a clear purpose, like illustrating a grammatical point or a cultural nuance. The core lesson remains standard-focused."
23. **Q1 (English Teacher):** "I focus on comprehensible input and output. My methods include using dialogues, role-plays, and grammar exercises that target specific standard forms. I emphasize listening comprehension and speaking fluency, with corrections usually focusing on intelligibility and accuracy in context."
24. **Q1 (Arabic Teacher):** "My approach is primarily grammar-translation and communicative. I use textbooks, drills for vocabulary and grammar, and encourage sentence formation. I also use reading passages and listening exercises, all in MSA."
25. **Q1 (French Teacher):** "I employ a mix of communicative language teaching and a more traditional approach for grammar. I use dialogues, role-plays, and grammar explanations, focusing on standard French pronunciation and sentence structure. Authentic materials are used sparingly but always with a focus on the standard."
26. **Q2 (English Teacher):** "I manage non-standard features by addressing them contextually. If it's a minor slip in informal class interaction, I might let it slide. For formal tasks like presentations or essays, I address recurring errors, usually by providing feedback privately or in a targeted mini-lesson. I don't actively encourage non-standard varieties but acknowledge their existence."
    * **Follow-up:** "I address them through gentle correction or by modeling the standard. For example, if a student says 'He no like,' I might rephrase as 'He doesn't like' and have them repeat. I tend to stick to standard English materials but might occasionally use authentic media with varied Englishes to discuss register."
27. **Q2 (Arabic Teacher):** "When students use dialect, I acknowledge their meaning but subtly rephrase or model the MSA equivalent in my next sentence or in a controlled practice activity. I avoid direct correction unless the dialectal feature significantly hinders formal communication or understanding of MSA."
    * **Follow-up:** "I address dialect by acknowledging the meaning and then offering the MSA form, e.g., 'That's how we say it in the dialect. In formal Arabic, we use...' I focus on recurring errors that impact formal contexts. My materials are strictly MSA."
28. **Q2 (French Teacher):** "I manage non-standard features by consistently modeling the standard. If a student uses a dialectal feature that affects clarity or is inappropriate for the task, I might address it privately or in a focused pronunciation or grammar session. I don't actively incorporate non-standard varieties, but I do use authentic media that might feature them for discussion."
    * **Follow-up:** "I address it by modeling the standard form. If it's a persistent pronunciation issue, I might dedicate a few minutes to specific sound drills. I don't use non-standard materials primarily, but authentic videos with variations can be useful for discussion on register."
29. **Q3 (English Teacher):** "The advantage of focusing solely on the standard is providing a clear target for academic and professional success, ensuring students are understood globally. The disadvantage is that it can sometimes create anxiety about errors, potentially hindering fluency and making language feel less accessible or 'real'."
30. **Q3 (Arabic Teacher):** "The advantage of focusing on MSA is meeting curriculum requirements and preparing students for formal settings. The disadvantage is that it can feel detached from their daily lives, potentially reducing engagement and making the language seem less dynamic or relevant to their immediate experiences."

**Section 4: Teacher Training and Professional Development**

1. **Q1 (English Teacher):** "My teacher training touched on general ESL methodology but had very little specific content on dialectal variations or how to handle L1 interference beyond basic error correction. It was largely absent."
2. **Q1 (Arabic Teacher):** "My training focused heavily on MSA pedagogy. We were taught grammar rules and teaching methods for MSA, but there was minimal discussion on diglossia or how to integrate colloquial Arabic into teaching, or even how to address dialectal influences on MSA."
3. **Q1 (French Teacher):** "It was very standard-focused, primarily on Parisian French. There was some mention of regional variations in linguistics courses, but no practical strategies were provided on how to teach them or manage students' L1 influences on French pronunciation."
4. **Q2 (English Teacher):** "I desperately need training on sociolinguistics, specifically the global landscape of World Englishes and how to teach English as a Lingua Franca (ELF). Practical workshops on analyzing and addressing common Arabic-to-English phonological and grammatical transfers would be invaluable."
5. **Q2 (Arabic Teacher):** "I would benefit greatly from professional development focused on applied Arabic dialectology, comparative linguistics between MSA and Egyptian dialects, and practical strategies for integrating colloquial Arabic into MSA instruction in a pedagogically sound way. Also, training on how to assess proficiency across both registers."
6. **Q2 (French Teacher):** "More in-depth training on the sociolinguistics of French, including exposure to and critical analysis of various regional and international varieties. Practical workshops on teaching pronunciation specifically for Arabic speakers, and how to discuss historical dialectal influences would be ideal."
7. **Q3 (English Teacher):** "Access to a toolkit of strategies for teaching intelligibility over native-like accent, resources for analyzing authentic materials with diverse English speakers, and clear guidelines on when and how to address dialectal features constructively."
8. **Q3 (Arabic Teacher):** "I wish I had more specific pedagogical resources and lesson plans that demonstrate how to use dialectal Arabic as a bridge to MSA, perhaps through comparative charts or guided discussions on linguistic evolution. Clear assessment rubrics that account for diglossia would also be helpful."
9. **Q3 (French Teacher):** "More access to authentic French materials showcasing regional variations and learner accents, along with practical teaching techniques for addressing pronunciation challenges specific to Arabic speakers learning French. Also, frameworks for discussing language prestige and attitudes."
10. **Q1 (English Teacher):** "My teacher training provided a solid foundation in general language pedagogy, but it was very theoretical regarding linguistic variation. There were some brief mentions of 'English as a Foreign Language' but not much on the sociolinguistics of English or practical ways to manage diverse learner Englishes."
11. **Q1 (Arabic Teacher):** "My university program was very traditional, focusing on MSA grammar and literature. We learned how to teach MSA, but there was no real engagement with the concept of diglossia or how to pedagogically address the interplay between MSA and colloquial Arabic. It was a significant gap."
12. **Q1 (French Teacher):** "The training was heavily focused on the standard French taught in France. While linguistics courses covered historical dialects, the practical application for managing L1 interference or teaching about Francophone variations was very limited. It felt like we were taught one version of French and expected to ignore the rest."
13. **Q2 (English Teacher):** "I'd love more practical, hands-on workshops on teaching English as a Lingua Franca (ELF). Specifically, strategies for developing students' intelligibility and communicative competence, rather than just accent reduction. Also, resources for analyzing authentic media with diverse English speakers would be great."
14. **Q2 (Arabic Teacher):** "Professional development focusing on comparative linguistics between MSA and Egyptian dialects would be incredibly beneficial. I need practical strategies and sample lesson plans for how to effectively introduce MSA vocabulary and grammar by leveraging students' dialectal knowledge, and how to assess them fairly."
15. **Q2 (French Teacher):** "I believe more in-depth training on the sociolinguistics of French globally is needed. This would include understanding the prestige associated with different varieties, and practical methods for teaching pronunciation challenges faced by Arabic speakers learning French, like specific vowels or the guttural 'r'."
16. **Q3 (English Teacher):** "I wish I had access to more diverse teaching materials that showcase different English varieties in a way that highlights their legitimacy and communicative functions. Also, a structured approach to error analysis that distinguishes between dialectal features and actual errors would be very helpful."
17. **Q3 (Arabic Teacher):** "I would greatly benefit from a resource bank of MSA materials that are engaging and relevant to young learners, and perhaps a guide on how to address the diglossic situation openly and constructively with students and parents. Practical examples of contrastive analysis are also desired."
18. **Q3 (French Teacher):** "More access to authentic French materials featuring various accents and regionalisms would be ideal, along with pedagogical frameworks for discussing language attitudes and the concept of 'standard' vs. 'non-standard' French in a balanced way."
19. **Q2 (English Teacher):** "I'd greatly appreciate training on how to effectively teach English as a Lingua Franca (ELF) principles, focusing on intelligibility, clarity, and mutual understanding across different English-speaking backgrounds, rather than just native-speaker norms."
20. **Q2 (Arabic Teacher):** "More practical training on comparative phonology between MSA and Egyptian dialects would be incredibly useful. Understanding the subtle differences in articulation and how to teach those specific sounds in MSA would be a game-changer."
21. **Q2 (French Teacher):** "I'd welcome modules on the sociolinguistics of French in the Francophone world, specifically examining how different varieties are perceived and valued. This knowledge would help me guide students in navigating those perceptions."
22. **Q3 (English Teacher):** "I really need a toolkit of strategies for fostering critical language awareness in students – helping them understand *why* standards exist, but also why variations are valid and how to critically engage with different forms of English."
23. **Q3 (Arabic Teacher):** "I wish for more practical resources that provide clear, concise comparative analyses of MSA and dialectal grammar. Having ready-made examples of how to bridge specific grammatical structures would save me a lot of preparation time and make my lessons more effective."
24. **Q3 (French Teacher):** "Access to a curated collection of authentic French audio and video materials featuring a range of accents and registers, accompanied by pedagogical notes on how to use them for teaching purposes, would be invaluable."

Here are 6 hypothetical responses for Section 4 of the interview guide, focusing on teacher training and professional development needs regarding linguistic variation. These responses are tailored for hypothetical teachers specializing in English, Arabic, and French in Egypt.

**Hypothetical Interview Responses for Section 4**

**Section 4: Teacher Training and Professional Development**

1. **Q1 (English Teacher):** "My teacher training was very theory-based regarding general ESL methods but lacked specific practical strategies for addressing dialectal variations or L1 interference patterns common among Egyptian learners of English. It was largely absent."
2. **Q1 (Arabic Teacher):** "My training was heavily focused on MSA pedagogy. While it covered grammar and literature, there was minimal discussion on diglossia or practical approaches to managing the interplay between MSA and colloquial Egyptian Arabic in the classroom."
3. **Q1 (French Teacher):** "The training was very standard-centric, focusing on Parisian French. While linguistics courses touched upon historical dialects, there were no practical modules on teaching regional variations or managing students' Arabic-influenced French pronunciation."
4. **Q2 (English Teacher):** "I would greatly benefit from workshops on teaching English as a Lingua Franca (ELF) principles, focusing on intelligibility and communicative competence rather than just accent reduction. Practical strategies for analyzing authentic materials with diverse English speakers are also needed."
5. **Q2 (Arabic Teacher):** "Professional development focusing on comparative linguistics between MSA and Egyptian dialects would be invaluable. I need practical strategies and resources for how to effectively integrate colloquial Arabic as a bridge to MSA, and for fair assessment of proficiency across both registers."
6. **Q2 (French Teacher):** "I'd welcome more in-depth training on the sociolinguistics of French globally, including understanding how different varieties are perceived. Practical workshops on addressing pronunciation challenges specific to Arabic speakers learning French are also a priority."

**Section 5: Closing Remarks**

1. **Q1 (English Teacher):** "I believe teacher training needs a significant overhaul to reflect the reality of linguistic diversity. We need to move away from a purely prescriptive, native-speaker-centric model towards one that embraces English as a global language and equips teachers to navigate variation with sensitivity and pedagogical skill."
2. **Q1 (Arabic Teacher):** "My main recommendation is for educational institutions to acknowledge the reality of diglossia and incorporate it into teacher training. We need to teach teachers how to leverage the students' L1 dialect as a strength in learning MSA, rather than treating it as an obstacle to be eradicated. This involves respecting students' identities and making MSA relevant."
3. **Q1 (French Teacher):** "It's crucial to foster a more nuanced understanding of French in teacher education. The focus should be not just on the Parisian standard but on the rich diversity of the Francophone world. Teachers need to be empowered to discuss variations, teach intelligibility, and create inclusive learning environments where all students feel their linguistic background is valued."
4. **Q1 (English Teacher):** "My final thought is that teacher education programs need to be more dynamic and reflective of the linguistic reality. We are teaching a global language, and our preparation should equip us to handle that diversity, fostering critical language awareness rather than just adherence to a single, often unattainable, standard."
5. **Q1 (Arabic Teacher):** "I strongly recommend that teacher preparation for Arabic should actively address diglossia. Teachers need to be trained to respect and leverage students' dialectal knowledge, guiding them towards MSA with empathy and clear pedagogical strategies, rather than creating a disconnect that can demotivate learners."
6. **Q1 (French Teacher):** "It's essential that future language teachers are trained to embrace the richness of linguistic variation. The focus should shift towards developing communicative competence in diverse contexts, equipping teachers with the tools to manage accents, address L1 influences, and foster an appreciation for the multifaceted nature of French."
7. **Q1 (English Teacher):** "Ultimately, my recommendation is for teacher education to embrace a more pluralistic view of language. We need to prepare teachers to be facilitators of communication in a diverse world, not just enforcers of a single standard. This includes understanding and valuing the linguistic repertoires our students bring."
8. **Q1 (Arabic Teacher):** "I believe that teacher training should actively encourage critical thinking about language attitudes and the sociology of Arabic. Instead of presenting MSA as the sole 'correct' form, it should be framed as one important register among others, with its specific domains and values clearly articulated."
9. **Q1 (French Teacher):** "My final thought is that the goal shouldn't be to erase students' linguistic backgrounds but to build upon them. Teacher preparation needs to reflect this, providing the skills to help students become proficient in standard French while respecting and understanding the broader linguistic landscape they inhabit."
10. **Q1 (English Teacher):** "A key takeaway for me is the need for teachers to feel empowered. If training focuses on developing a deep understanding of linguistic variation and provides practical tools, teachers can approach the topic with confidence, fostering more inclusive and effective learning environments."
11. **Q1 (English Teacher):** "My main recommendation is for teacher education programs to actively incorporate sociolinguistics and the realities of World Englishes. We need to equip teachers to be confident facilitators of communication in a diverse linguistic landscape, rather than solely prescribers of a single standard."
12. **Q1 (Arabic Teacher):** "I strongly believe that Arabic teacher training must explicitly address diglossia. We need to provide teachers with the skills to respect and leverage students' dialectal knowledge, guiding them towards MSA with empathy, fostering a connection between the two registers, not a divide."
13. **Q1 (French Teacher):** "The goal should be to build bridges, not walls, between standard and non-standard French. Teacher training needs to reflect this by emphasizing communicative competence across registers and preparing educators to foster an appreciation for the rich diversity of the Francophone world."
14. **Q1 (English Teacher):** "We need to move beyond the native-speaker ideal in training and embrace the concept of English as a Lingua Franca. Teachers should be equipped to teach intelligibility, clarity, and critical awareness of language variation, empowering them to create more inclusive classrooms."
15. **Q1 (Arabic Teacher):** "Teacher preparation should focus on making MSA relevant and accessible. This means actively challenging negative attitudes towards dialects and providing practical strategies for using the students' own language as a springboard for learning MSA, thereby validating their identities."
16. **Q1 (French Teacher):** "My final thought is about empowerment. If teachers feel confident and equipped to handle linguistic variation, they can create more supportive learning environments. Training should focus on practical tools for addressing L1 influences and fostering a positive attitude towards all French varieties."
17. **Q1 (English Teacher):** "The key is to foster critical language awareness. Teachers need to understand that language is a social construct and that variations have functions. Training should encourage this critical perspective, enabling teachers to guide students to make informed linguistic choices."
18. **Q1 (Arabic Teacher):** "We need to recognize that dialects are not 'wrong' but different registers with their own contexts. Teacher training should reflect this, offering practical frameworks for comparative linguistics between MSA and dialects, and for assessment that accounts for this dual reality."
19. **Q1 (French Teacher):** "The focus should be on broadening the understanding of French beyond the Parisian standard. Teachers need to be trained on the sociolinguistics of French globally and how to integrate diverse accents and regionalisms into the curriculum constructively, promoting cultural understanding alongside linguistic skill."
20. **Q1 (English Teacher):** "I'd recommend more practical, hands-on training in phonetics and phonology relevant to common L1 transfer errors for Egyptian learners of English. Understanding the 'why' behind pronunciation challenges makes addressing them much more effective."
21. **Q1 (Arabic Teacher):** "My biggest recommendation is for teacher education to include applied dialectology and sociolinguistics. Understanding the linguistic landscape of Egypt and the specific challenges of diglossia is crucial for effective MSA instruction."
22. **Q1 (French Teacher):** "More emphasis on the history and sociolinguistics of French dialects would be beneficial. Teachers need to understand the evolution of the language to better contextualize variations for their students and manage their own teaching approaches."
23. **Q1 (English Teacher):** "Teacher training should explicitly challenge the native-speaker fallacy and embrace the principles of English as a Lingua Franca. We need to be prepared to teach for intelligibility and effective communication in a global context."
24. **Q1 (Arabic Teacher):** "It's vital that teacher preparation programs destigmatize dialects. Teachers should be equipped with tools to discuss linguistic variation respectfully and pedagogically, making the classroom a safe space for all students' linguistic identities."
25. **Q1 (French Teacher):** "Practical strategies for teaching challenging French grammar, such as the subjunctive mood or complex agreement rules, tailored for Arabic L1 speakers, are essential in teacher training."
26. **Q1 (English Teacher):** "Resources and training on translanguaging pedagogy would be incredibly valuable. Learning how to leverage students' entire linguistic repertoire as a resource, rather than seeing it as an obstacle, can significantly enhance learning."
27. **Q1 (Arabic Teacher):** "Comparative linguistic analysis of MSA and Egyptian dialects, focusing on practical teaching applications for vocabulary and grammar, would be a significant asset in teacher preparation."
28. **Q1 (French Teacher):** "Teacher training should include robust modules on fair assessment methods for oral proficiency, which acknowledge and account for diverse accents and linguistic backgrounds, rather than solely penalizing deviation from a perceived standard."
29. **Q1 (English Teacher):** "More focus on teaching English idioms and phrasal verbs in context, emphasizing their cultural relevance, would improve preparedness for authentic communication tasks."
30. **Q1 (Arabic Teacher):** "Guidance on how to make MSA feel relevant and engaging for younger learners, perhaps by connecting it to modern media and students' interests, is crucial for effective pedagogy."
